# Supplementary material for: Microbial communities in pyrene amended soil–compost mixture and fertilized soil
Source: AMB Express. 2017 Jan 3;7:7. doi: 10.1186/s13568-016-0306-9 (PMC5209307; doi:10.1186/s13568-016-0306-9)
Supplement: Supplementary file 2 — Additional file 2. Supporting material on phylotype sequences related to Tables S1, S2, S4, and S5. [file 13568_2016_306_MOESM2_ESM.xlsx]

## Sheet: General Information
Supporting Material
AMB Express
Microbial communities in pyrene amended soil-compost mixture and fertilized soil
Iris K. U. Adam a, Márcia Duarte b, Jananan Pathmanathan c,d, Anja Miltner a, Thomas Brüls c,d, Matthias Kästner a#
a) Helmholtz-Centre for Environmental Research – UFZ, Department of Environmental Biotechnology, Leipzig, Germany.
b) Helmholtz Centre for Infection Research - HZI, Microbial Interactions and Processes Research Group, Braunschweig, Germany
c) Genoscope / Institut de Génomique du CEA, Evry, France
d) CNRS-UMR8030, Université d’Evry Val d’Essonne and Université Paris-Saclay, Evry, France
#) Corresponding author; phone: +49 341 235 1235 / fax: +49 341 235 451235; e-mail: matthias.kaestner@ufz.de

## Sheet: Table S1
TABLE S1 Phylotype sequences of isolated bacteria in liquid cultures from compost (C1) and soil-compost mixture (UC 2, 7, 8) obtained from Sanger sequencing targeting the 16S rRNA gene and phylogenetic affiliations based on annotation, using the SeqMatch analysis tool of the Ribosomal Database Project (uncultured bacteria and isolates, only good quality sequences >1200 bases) (Cole et al. 2013). …
		Phylogenetic affiliation
Culture designation	Sequence	Phylum	Class	Order	Family	Genus	Sequence full name of five matches displayed per sequence	S_ab Score	GenBank Accession number
C1	GGTTAGGCCACCGGCTTCGGGTGTTACCGACTTTCATGACGTGACGGGCGGTGTGTACAAGGCCCGGGAACGTATTCACCGCAGCGTTGCTGATCTGCGATTACTAGCGACTCCGACTTCACGGGGTCGAGTTGCAGACCCCGATCCGAACTGAGACCGGCTTTGAAAGGATTCGCTCCACCTCACGGCATCGCAGCCCTTTGTACCGGCCATTGTAGCATGTGTGAAGCCCTGGACATAAGGGGCATGATGACTTGACGTCATCCCCACCTTCCTCCGAGTTGACCCCGGCAGTCTCCCATGAGTCCCCACCATCACGTGCTGGCAACATGGGACAAGGGTTGCGCTCGTTGCGGGACTTAACCCAACATCTCACGACACGAGCTGACGACAGCCATG…	Actinobacteria	Actinobacteria	Actinomycetales	Mycobacteriaceae	Mycobacterium	Mycobacterium pulveris	0,929	AJ429046
							Mycobacterium fallax	0,924	AF480600
							Mycobacterium, uncultured bacterium	0,928	FJ479067
							Mycobacterium barrassiae	0,926	FN649460
							Mycobacterium, uncultured bacterium	0,925	JX133572
UC2	TGACGGGCGGTGTgtACAAGGCCCGGGAACGTATTCACCGCAGCGtTGCTGATCTGCGATTACTAGCGACTCCGACTTCACGGGGTCGAGTTGCAGACCCCGATCCGAACTGAGACCGGCTTTGAAAGGATTCGCTCCACCTCACGGCATCGCAGCCCTTTGTACCGGCCATTGTAGCATGTGTGAAGCCCTGGACATAAGGGGCATGATGACTTGACGTCATCCCCACCTTCCTCCGAGTTGACCCCGGCAGTCTCTCACGAGTCCCCGCCATTACGCGCTGGCAACATAAGATAAGGGTTGCGCTCGTTGCGGGACTTAACCCAACATCTCACGACACGAGCTGACGACAGCCATGCACCACCTGCACACAGGCCACAAGGGAATACCTATCTCTAG…	Actinobacteria	Actinobacteria	Actinomycetales	Mycobacteriaceae	Mycobacterium	Mycobacterium austroafricanum	0.976	X93182
							Mycobacterium sp.	1	AF544230
							Mycobacterium aichiense;	0.985	AF498656
							Mycobacterium sp.	0.985	U62889
							Mycobacterium sp.	0.985	U62890
UC7	ACGGGCGGtgtgtACAAGGCCCGGGAACGTATTCACCGCAGCGTTgCTGATCTGCGATTACTAGCGACTCCGACTTCACGGGgtCGAGTTGCAGACCCCGATCCGAACTGAGACCGGCTTTGAAAGGATTCGCTCCACCTCACGGCATCGCAGCCCTTTGTACCGGCCATTGTAGCATGTGTGAAGCCCTGGACATAAGGGGCATGATGACTTGACGTCATCCCCACCTTCCTCCGAGTTGACCCCGGCAGTCTCTCACGAGTCCCCGCCATTACGCGCTGGCAACATAAGATAAGGGTTGCGCTCGTTGCGGGACTTAACCCAACATCTCACGACACGAGCTGACGACAGCCATGCACCACCTGCACACAGGCCACAAGGGAATACCTATCTCTAGGC…	Actinobacteria	Actinobacteria	Actinomycetales	Mycobacteriaceae	Mycobacterium	Mycobacterium austroafricanum	0.993	X93182
							Mycobacterium sp. S65	1	AF544230
							Mycobacterium aichiense	1	AF498656
							Mycobacterium sp. T103	1	U62889
							Mycobacterium sp. T104	1	U62890
UC8	ACAAGGCCCGGGAAcGTATTCACCGCAGCGTTGCtGATCTGCGATTACTAGCGACTCCGACTTCACGGGGTCGAGTTGCagACCCCGATCCGAACtgagACCGGCTTTGAAAGGATTCGCTCCACCTCACGGCATCGCAGCCCTTTGTACCGGCCATTGTAGCATGTGTGAAGCCCTGGACATAAGGGGCATGATGACTTGAcGTCATCCCCACCTTCCTCCGAGTTGACCCCGGCAGTCTCTCACGAGTCCCCGCCATTACGCGCTGGCAACATAAGATAAGGGTTGCGCTCGTTGCGGGACTTAACCCAACATCTCACGACACGAGCTGACGACAGCCATGCACCACCTGCACACAGGCCACAAGGGAATACCTATCTCTAGGCACGTCCTGTGCAT…	Actinobacteria	Actinobacteria	Actinomycetales	Mycobacteriaceae	Mycobacterium	Mycobacterium austroafricanum	0.995	X93182
							Mycobacterium sp. S65	0.995	AF544230
							Mycobacterium vanbaalenii	0.995	X84977
							Mycobacterium vanbaalenii	0.995	AY636002
							Mycobacterium aichiense	0.995	AF498656

## Sheet: Table S2
TABLE S2 Phylotype sequences and phylotype relative abundances of bacteria liquid cultures from soil-compost mixture (UC 3, 4, 5, 9) obtained from Illumina sequencing targeting the 16S rRNA gene (amplicon library) and phylogenetic affiliations based on annotation, using the SeqMatch analysis tool of the Ribosomal Database Project (uncultured bacteria and isolates, only good quality sequences >120…
		Relative abundance (%)					Phylogenetic affiliation - smallest assignable taxonomic unit
OTU	Sequence	UC3	UC4	UC5	UC9	Domain	Phylum	Class	Order	Family	Genus
1	CACGCCGTAAACGGTGGGTACTAGGTGTGGGTTTCCTTCCTTGGGATCCGTGCCGTAGCTAACGCATTAAGTACCCCGCCTGGGGAGTAC	74.9131	73.4436	73.932	96.0277	Bacteria	Actinobacteria	Actinobacteria	Actinomycetales	Mycobacteriaceae	Mycobacterium
2	CACGCCGTAAACGATGAGTGCTAAGTGTTAGGGGGTTTCCGCCCCTTAGTGCTGCAGCTAACGCATTAAGCACTCCGCCTGGGGAGTACG	0.0178237	0.00691754	0.038373	0.106638	Bacteria	Firmicutes	Bacilli	Bacillales	Bacillaceae 1	Bacillus
3	CACGCCCTAAACGATGTCAACTAGCTGTTGGGGACTTCGGTCCTTGGTAGCGCAGCTAACGCGTGAAGTTGACCGCCTGGGGAGTACGGT	21.0498	24.1007	22.9854	0.466542	Bacteria	Proteobacteria	Betaproteobacteria	Burkholderiales	Alcaligenaceae	Bordetella
4	CACGCCGTAAACGGTGGGTACTAGGTGTGGGTTCTTTCCTAAGGATCCGTGCCGTAGCTAACGCATTAAGTACCCCGCCTGGGGAGTACG	0	0	0	0	Bacteria	Actinobacteria	Actinobacteria	Actinomycetales	Mycobacteriaceae	Mycobacterium
5	CACGCCCTAAACGATGCGAACTGGATGTTGGGTGCACTTTGGCACGCAGTATCGAAGCTAACGCGTTAAGTTCGCCGCCTGGGGAGTACG	0	0	0	0	Bacteria	Proteobacteria	Gammaproteobacteria	Xanthomonadales	Xanthomonadaceae	Stenotrophomonas
6	CATGCCGTAAACGGTGGGCGCTAGGTGTAGGGGCCTTTTGGGGTTTCTGTGCCGTAGCTAACGCATTAAGCGCCCCGCCTGGGGAGTACG	0	0	0	0.0133298	Bacteria	Actinobacteria	Actinobacteria	Actinomycetales	Corynebacteriaceae	Corynebacterium
7	CACGCCGTAAACGATGAGTGCTAAGTGTTGGGGGCTTTCCGGCCCTCGGTGCTGGAGCTAACGTATTAAGCACTCCGCCTGGGGATTACG	0	0	0	0.0199947	Bacteria	Firmicutes	Bacilli	Lactobacillales	Carnobacteriaceae	Dolosigranulum
8	CACGCCGTAAACGGTGGGTACTATGTGTGTGTTTCCTTCCTTGGGATCCGTGCCGTAGCTAACGCATTAAGTACCCCGCCTGGGGAGTAC	0.133678	0.131433	0.166283	0.233271	Bacteria	Actinobacteria	Actinobacteria	Actinomycetales	Mycobacteriaceae	Mycobacterium
9	CACGCCGTAAACGATGAGTGCTAAGTGTTGGAGGGTTTCCACCCTTCAGTGCTGCAGCTAACGCATTAAGCACTCCGCCTGGGGAGTACG	0.0534712	0.0345877	0.281402	0.533191	Bacteria	Firmicutes	Bacilli	Lactobacillales	Carnobacteriaceae	Trichococcus
10	CACGCCGTAAACGGTGGGTCCTATGTGTGGGTTTCCTTCCTTGGGATCCGTGCCGTAGCTAACGCATTAAGTACCCCGCCTGGGGAGTAC	0.0891186	0.138351	0.076746	0.193282	Bacteria	Actinobacteria	Actinobacteria	Actinomycetales	Mycobacteriaceae	Mycobacterium
11	CACGCCGTAAACGATGATAACTAGCTGTCCGGGTTCATAGAACTTGGGTGGCGCAGCTAACGCATTAAGTTATCCGCCTGGGGAGTACGG	1.87149	0	0	0	Bacteria	Proteobacteria	Alphaproteobacteria	Sphingomonadales
12	CACGCCGTAAACGATGGATACTAGCTGTTGGGAGCAATCTCAGTGGCTAAGCGAAAGTGATAAGTATCCCACCTGGGGAGTACGTTCGCA	0.0356474	0.0276702	0.281402	0.226606	Bacteria	Bacteroidetes	Flavobacteria	Flavobacteriales	Flavobacteriaceae	Flavobacterium
13	ATTGGAGGCCAGGTCGAGTTCGGTGGCCACCGCCGGCCGGGTGCGCAGCGAACGGCGCAGGCCGGCCTGCCGGCGCTGCTGCTCGACGGT	0.0712949	0.0553403	0.115119	0.186617	Bacteria					(uncultured bacterium; C15_B13; AY993691)
14	CACGCTGTAAACGATGTCGATTTGGAGTTTGTGCCATTATGAGCGTGGGTTCCGAAGCTAACGCGATAAATCGACCGCCTGGGGAGTACG	0.0445593	0	0.076746	0.146628	Bacteria	Proteobacteria	Gammaproteobacteria	Aeromonadales	Aeromonadaceae	Tolumonas
15	CACGCCGTAAACGGTGGGTACTAGGTGTGGGTTTCCTTCCTTGGGATCCGTGCCGTAGCTAACGCATTAAGTACCCCGCCTGGGAGTACG	0.0267356	0.0553403	0.038373	0.0866436	Bacteria	Actinobacteria	Actinobacteria	Actinomycetales	Mycobacteriaceae	Mycobacterium
16	CACGCCCTAAACGATGTCAACTAGCTGTTGGTGACTTCGGTCCTTGGTAGCGCAGCTCACGCGTGAAGTTGACCGCCTGGGGAGTACGGT	0.0445593	0.0691754	0.12791	0	Bacteria	Proteobacteria	Betaproteobacteria	Burkholderiales	Alcaligenaceae
17	CACGCCCTAAACGATGTCAACTATCTGTTTGGGACTTCGGTCCTTGGTAGCGCAGCTAACGCGTGAAGTTGACCGCCTGGGGAGTACGGT	0.0178237	0.110681	0.051164	0	Bacteria	Proteobacteria	Betaproteobacteria	Burkholderiales	Alcaligenaceae
18	CACGCAGTAAACGATGATTACTAGCTGTTTGCGATACACAGTAAGCGGCACAGCGAAAGCGTTAAGTAATCCACCTGGGGAGTACGCCGG	0.00891186	0	0.089537	0.119968	Bacteria	Bacteroidetes	Bacteroidia	Bacteroidales	Porphyromonadaceae	Parabacteroides
19	CGGCAAGTGGGGCGTGGGCTGCTCCTTCATCCGGTGCGCCAGCCACTGGCTTCCGTTGGTCTGAATCAGCGCATAGCGCCCGGAGATCCG	0	0.0138351	0	0.0666489	Bacteria					(Corynebacterium sp. 61722; AF227828)
20	CACGCCGTAAACGATGAGTGCTAGATGTAGGGAGCTATAAGTTCTCTGTATCGCAGCTAACGCAATAAGCACTCCGCCTGGGGAGTACGA	0	0.00691754	0.076746	0.0799787	Bacteria	Firmicutes	Bacilli	Lactobacillales	Streptococcaceae	Lactococcus
21	CACGCCGTAAACGGCGGGTACTAGGCGTGGGTTTCCTTCCTTGGGATCCGTGCCGTAGCTAACGCATTAAGTACCCCGCCTGGGGAGTAC	0.0267356	0.0622579	0.038373	0.0266596	Bacteria	Actinobacteria	Actinobacteria	Actinomycetales	Mycobacteriaceae	Mycobacterium
22	CACGCCGTAAACGGTGGGTACTATGTGTGGGTTTCCTTCCTTGGGATCCGTGCCGTAGCTAAAGCATTAAGTACCCCGCCTGGGGAGTAC	0	0.00691754	0	0.0266596	Bacteria	Actinobacteria	Actinobacteria	Actinomycetales	Mycobacteriaceae	Mycobacterium
23	GCGCATCGCATCCGGGTCGGTCATGAAATCGGACATCTATTTGCTCCTGGATTTGTTGGTGGAAGTGCTGGCCATTTGCTTGGACTCGTT	0.0178237	0.0138351	0	0.0133298	Bacteria					(Natronorubrum sp. Wadi Natrun-19; AB046926)
24	CACGCCGTAAACGATGTCAACTTGGAGCCTGTGCACTAGATGCGTGGGGTCCGAAGCTAACGCGATAAGTTGACCGCCTGGGGAGTACGG	0	0.00691754	0.025582	0.0866436	Bacteria	Proteobacteria	Gammaproteobacteria	Aeromonadales	Aeromonadaceae
25	CACGCCGTAAACGGTGGGCACTAGGCGTGGGTTTCCTTCCTTGGGATCCGTGCCGTAGCTAACGCATTAAGTACCCCGCCTGGGGAGTAC	0.0178237	0.0138351	0.012791	0	Bacteria	Actinobacteria	Actinobacteria	Actinomycetales	Mycobacteriaceae	Mycobacterium
26	CACGCCCTAAACGATGTCACCTATCTGTTGGGGACTTCGGTCCTTGGTAGCGCAGCTAACGCGTGAAGTTGACCGCCTGGGGAGTACGGT	0.0267356	0.0138351	0.051164	0	Bacteria	Proteobacteria	Betaproteobacteria	Burkholderiales	Alcaligenaceae
27	CACGCCCTAAACGATGTCCACTAGCTGTTGGTGACTTCGGTCCTTGGTAGCGCAGCTAACGCGTGAAGTTGACCGCCTGGGGAGTACGGT	0.0445593	0.0345877	0.025582	0	Bacteria	Proteobacteria	Betaproteobacteria	Burkholderiales	Alcaligenaceae
28	CACGCCGTAAACGGCGGGCACTAGGTGTGGGTTTCCTTCCTTGGGATCCGTGCCGTAGCTAACGCATTAAGTACCCCGCCTGGGGAGTAC	0.0178237	0.0138351	0.025582	0.0199947	Bacteria	Actinobacteria	Actinobacteria	Actinomycetales	Mycobacteriaceae	Mycobacterium
29	CACGCCGTAAACGGTGGGTACTAGGTGTGGGGGACTTCGGTCCTTGGTAGCGCAGCTAACGCGTGAAGTTGACCGCCTGGGGAGTACGGT	0.0445593	0.0622579	0.012791	0	Bacteria	Proteobacteria
30	CACGCCGTAAACGATGAGTGCTAGGTGTTAGACCCTTTCCGGGGTTTAGTGCCGCAGCTAACGCATTAAGCACTCCGCCTGGGGAGTACG	0	0	0.012791	0.0333244	Bacteria	Firmicutes	Bacilli	Lactobacillales	Streptococcaceae	Streptococcus
31	CACGCCCTAAACGATGTTAACTAGCTGTTGGGGACTTCGGTCCTTGGTAGCGCAGCTCACGCGTGAAGTTGACCGCCTGGGGAGTACGGT	0.0445593	0.0691754	0.012791	0	Bacteria	Proteobacteria	Betaproteobacteria	Burkholderiales	Alcaligenaceae	Bordetella
32	CACGCGGTAAACGATGAGTGCTAGGTGTTGGGGTGACTCAGTGCCGTAGTTAACACAATAAGCACTCCGCCTGGGGAGTACGGTCGCAAG	0	0	0	0.0266596	Bacteria	Firmicutes	Clostridia	Clostridiales

## Sheet: Table S4
TABLE S4 Sequences and relative abundances of phylotypes based on 16S rDNA amplicons from extracted DNA and RNA (cDNA) of controls (C) and pyrene treatment (P) of unfertilized soil-compost mixture (UC) at day 0, 35, 48 and 160 and phylogenetic affiliations based on annotation, using the SeqMatch analysis tool of the Ribosomal Database Project (uncultured bacteria and isolates, only good quality s…
		Phylotype relative abundance [%] based on RNA samples at days 0, 35, 48 and 160								Phylotype relative abudance [%] based on DNA samples at days 0, 35, 48 and 160																								Phylogenetic affiliation - smallest assignable taxonomic unit
OTU	Sequence	RC_UC_0	RP_UC_0	RC_UC_35	RP_UC_35	RC_UC_48	RP_UC_48	RC_UC_160	RP_UC_160	DC1_UC_0	DC2_UC_0	DC3_UC_0	DP1_UC_0	DP2_UC_0	DP3_UC_0	DC1_UC_35	DC2_UC_35	DC3_UC_35	DP1_UC_35	DP2_UC_35	DP3_UC_35	DC1_UC_48	DC2_UC_48	DC3_UC_48	DP1_UC_48	DP2_UC_48	DP3_UC_48	DC1_UC_160	DC2_UC_160	DC3_UC_160	DP1_UC_160	DP2_UC_160	DP3_UC_160	Domain	Phylum	Class	Order	Family	Genus
1	GATGAACGCTAGCGGCAGGCCTAACACATGCAAGTCGAGGGGTATAGATTAGCTTGCTAATCTAGAGACCGGCGCACGGGTGAGTAACGCGTATGCAACCTACCTTTCACAAAGGGATAG-ACGGTGAAAGATGGGCATGCGTCTTATTAGTTAGATGGTGTGGTAACGGCACACCATGACTACGATAAGTAGGGGTCCTGAGAGGGAGATCCCCCACACTGGAACTGAGACACGGACCAG	15.1333	12.3292	12.0363	13.2491	11.8024	12.567	6.42172	4.9452	12.1689	15.9578	8.35471	9.58732	9.86649	11.4501	11.7919	13.3378	13.519	15.0978	14.5849	13.9767	11.9003	11.8234	14.0058	13.2054	14.3387	9.94588	5.28937	4.70246	6.88676	5.40333	5.29534	6.27028	Bacteria	Bacteroidetes	Flavobacteria	Flavobacteriales	Flavobacteriaceae	un_Flavobacteriaceae
2	GATGAACGCTGGCGGCGTGCCTAATACATGCAAGTCGAACGCGAAAGGTCTGAAGCCTTCGGGCGGAGGGCCGAGTAGAGTGGCGAACGGGTGAGGAACACGTAGGTGACCTGCCCCGGA-GCGCTCCGGGAGGGGCCTGCGGCCCATCAGCTAGTTGGTAGGGTAAAGGCCTACCAAGGCGAAGACGGGTAGGGGGCCTGAGAGGGTGGTCCCCCACATGGGAACTGAGACACGGTCCCA	4.15225	6.12245	3.3565	2.89482	2.79666	1.47103	1.69205	2.98115	13.52	15.2367	13.0634	18.5204	18.4883	18.6179	9.26281	10.2121	9.58451	8.38311	9.64207	8.03113	7.30268	10.0997	7.98253	8.7276	8.77001	10.1778	7.04459	6.96885	3.85869	8.1015	9.1832	7.59158	Bacteria	Chloroflexi	Anaerolineae	Anaerolineales	Anaerolineaceae	un_Anaerolineaceae
3	GATGAACGCTAGCGGCAGGCCTAACACATGCAAGTCGAGGGGCATCACGGAAAAGCTTGCTTTTCCGGTGGCGACCGGCGCACGGGTGAGGAGCACGTATGGAACCTGCCCCTGTCAGGG-TCGGACAGGGATGGCCATGCGCACCATTAGCTTGTTGGGGGGGTAACGGCCCACCAAGGCTACGATGGTTAGGGGCCCTGAGAGGGGGATCCCCCACACTGGTACTGAGACACGGACCAG	1.01771	1.63603	3.94535	4.01841	4.70173	4.69113	5.69656	4.9189	1.11111	1.01701	1.0993	0.754907	1.01833	1.32329	4.07691	4.57007	4.59553	4.44902	4.6019	4.76265	4.9872	5.00629	5.49709	4.90848	5.45072	5.19435	4.72011	4.9085	6.28746	4.99091	4.53969	4.81921	Bacteria	Bacteroidetes	Flavobacteria	Flavobacteriales	Flavobacteriaceae	Muricauda
4	GATGAACGCTAGCGGCAGGCCTAATACATGCAAGTCGAACGGTAAGTATTTTAGCAATAGGATACGAGAGTGACGTACGGGTGCGTAACACGTATGCAACCTACCCAAAACAGGAGGATA-GTGGTTTTGGATGGGCATGCGTATGATTAGTTAGTTGGTAGTGTAACGGACTACCAAGACGATGATCATTAGGGGACCTGAGAGGGTGATCCCCCACACTGGCACTGAGATACGGGCCAG	0.0712396	0.067465	0.836179	0.187266	1.30853	0.540896	2.80396	1.54318	0.195556	0.129438	0.256504	0.201309	0.203666	0.220548	1.92277	1.62492	1.66824	0.968074	0.852204	0.871595	3.38417	3.14709	4.26556	1.95706	1.59225	1.79237	8.12381	9.25948	9.70455	5.90661	5.42801	5.49165	Bacteria	Bacteroidetes	Bacteroidetes_i.s.	Bacteroidetes_i.s.	Bacteroidetes_i.s.	Ohtaekwangia
5	AGTGAACGCTGGCGGCAGGCCTAACACATGCAAGTCGAACGGCAGCGGGTCCTTCGGGATGCCGGCGAGTGGCGGACGGGTGAGGAATGCGTCGGAATCTGCCTCTTTGTGGGGGATAAC-GCGCAGAGAGATGAGCCGACGCCGGATTAGCTAGTTGGCGGGGTAAAGGCCCACCAAGGCGACGATCCGTAGCTGGTCTGAGAGGATGATCAGCCACACTGGAACTGAGACACGGTCCAG	2.13719	1.70349	1.30727	2.29401	1.22514	2.23941	0.862138	1.06094	0.906667	0.869083	1.0077	0.880725	1.01833	0.735159	2.33764	2.09885	2.01448	3.15139	3.40881	3.23735	2.53813	2.23685	2.66458	2.97676	2.84751	3.05757	1.6129	1.40589	2.11334	2.20187	2.06507	1.95836	Bacteria	Proteobacteria	Gammaproteobacteria	Xanthomonadales	Xanthomonadaceae	Lysobacter
6	GATGAACGCTAGCGGGAGGCTTAATACATGCAAGTCGAACGGCAGCAGGTCCTTCGGGATGCTGGCGAGTGGCGAACGGGTGAGTAACGCGTACACGATCTGCCCATAAGTCTGGGATAG-CTGCTTATGGATGAGTGTGCGTCCTATTAGTTAGTTGGTGAGGTAACGGCTCACCAAGACGATGATAGGTAGGGGGCGTGAGAGCGTGGACCCCCACACGGGTACTGAGACACGGACCCG	1.85223	2.42874	2.74408	2.69975	3.29057	3.25548	2.95705	2.49014	2	1.59024	1.04434	2.23956	1.92351	2.04007	2.73656	3.02415	3.95027	3.31617	3.33577	2.98833	4.10776	3.63126	4.25437	3.50877	4.2123	3.2122	3.17837	3.16325	3.90075	2.87292	2.8784	2.66619	Bacteria	Bacteroidetes	Sphingobacteria	Sphingobacteriales	Saprospiraceae	Haliscomenobacter
7	GATGAACGCTAGCGGCAGGCCTAACACATGCAAGTCGAGGGGCATCACGGAAAAGCTTGCTTTTCTGGTGGCGACCGGCGCACGGGTGAGGACCACGTATGGAACCTGCCCCTGTCAGGG-TCGGACAGGGATGGCCATGCGCACCATTAGCTAGTTGGTAGGGTAACGGCCTACCAAGGCGACGATGGTTAGGGGCCCTGAGAGGGGGATCCCCCACACTGGTACTGAGACACGGACCAG	1.74028	1.61916	1.73124	1.61517	1.21873	1.25872	0.684876	0.762823	1.19111	0.813609	1.08098	0.855561	1.01833	0.992465	1.65949	1.9183	2.04596	1.79197	1.70441	1.58755	1.5251	1.743	1.79131	1.69105	1.87869	1.79237	0.960626	0.763544	1.37735	1.1953	1.01523	1.17383	Bacteria	Bacteroidetes	Flavobacteria	Flavobacteriales	Flavobacteriaceae	Muricauda
8	GACGAACGCTGGCGGCGTGCTTAACACATGCAAGTCGAACGATGAAGCCTTTCGGGGTGGATTAGTGGCGAACGGGTGAGTAACACGTGGGCAATCTGCCCTTCACTCTGGGACAAGCCC-GCGGTGAAGGATGAGCCCGCGGCCTATCAGCTAGTTGGTGGGGTGATGGCCTACCAAGGCGACGACGGGTAGCCGGCCTGAGAGGGCGACCGGCCACACTGGGACTGAGACACGGCCCAG	2.65622	1.95649	2.36721	2.34082	1.12893	1.46092	1.48256	2.13941	1.32444	1.90459	2.14364	1.13236	1.31251	0.992465	1.34035	1.2074	0.723953	2.24511	1.50962	1.49416	0.222643	1.12327	0.335871	1.38704	1.24684	1.56744	0.889469	0.860502	0.210283	1.6916	1.60937	1.92296	Bacteria	Actinobacteria	Actinobacteria	Actinomycetales	Streptomycetaceae	Streptomyces
9	AACGAACGCTGGCGGCAGGCTTAACACATGCAAGTCGAACGCACTCTTCGGAGTGAGTGGCAGACGGGTGAGTAATGCGTGGGAATCTACCTAGTTCTACGGAATAACAGTTGGAAACGA-TCGGAATTAGATGAGCCCACGTAAGATTAGCTAGTTGGTGAGGTAATGGCTCACCAAGGCGACGATCTTTAGCTGGTCTGAGAGGATGATCAGCCACACTGGGACTGAGACACGGCCCAG	1.41461	1.11317	0.447533	0.647628	0.45542	0.571226	0.233664	0.394564	1.76	1.84911	1.55735	1.76145	1.78773	1.78276	0.773895	0.823742	0.991501	1.5036	1.43657	1.12062	0.812646	0.658468	0.88446	0.931028	1.04465	0.773178	0.628558	0.569628	0.725476	0.692017	0.559529	0.701941	Bacteria	Proteobacteria	Alphaproteobacteria	Rhizobiales	Hyphomicrobiaceae	Devosia
10	AGTGAACGCTGGCGGCAGGCCTAACACATGCAAGTCGAACGGCAGCACAGGAGAGCTTGCTCTCTGGGTGGCGAGTGGCGGACGGGTGAGGAATACGTCGGAATCTGCCTTTTTGTGGGG-GCGCAGAAAGATGAGCCGACGTCGGATTAGCTAGTTGGAGGGGTAATGGCCCACCAAGGCGACGATCCGTAGCTGGTCTGAGAGGATGATCAGCCACACTGGGACTGAGACACGGCCCAG	1.36373	0.67465	0.423978	0.702247	0.538807	1.30422	0.709048	0.569925	0.871111	0.739645	0.714547	0.603926	0.769405	0.606506	0.957396	0.868878	0.83412	1.23584	0.92525	0.964981	0.801514	0.881185	1.2987	1.1527	1.14575	1.05433	0.664137	0.654466	0.956787	0.796868	0.824873	1.00277	Bacteria	Proteobacteria	Gammaproteobacteria	Xanthomonadales	Xanthomonadaceae	Lysobacter
11	GATGAACGCTGGCGGCGTGCCTAATGCATGCAAGTCGAGCGACGCATGCCGGAGGGGTAACCCACTGGTATGACGGAGCGGCGAACGGGTGAGTAACACGTGAGCAACCTGCCCCTCAGA-GCGCTGAGGGATGGGCTCGCGGCCTATCAGCTAGTTGGTGGGGTAACGGCCTACCAAGGCATCGACGGGTAGCTGGTCTGAGAGGACGATCAGCCACACTGGGACTGAGACACGGCCCAG	0.427437	0.371058	0.37687	0.546192	0.519564	0.702659	0.362582	0.36826	1.37778	1.36834	1.66728	1.6608	1.26726	1.28653	0.901548	0.914015	0.928549	0.556128	1.02264	0.933852	0.83491	0.910235	0.638155	0.810691	0.783488	1.11056	0.830171	0.642346	0.357481	1.0555	1.11906	1.05586	Bacteria	Actinobacteria	Actinobacteria	un_Actinobacteria	un_Actinobacteria	un_Actinobacteria
12	ATTGAACGCTGGCGGAATGCTTTACACATGCAAGTCGAACGGCAGCACGGAGAGCTTGCTCTCTGGTGGCGAGTGGCGAACGGGTGAGTAACATATCGGAACGTATCCAATAATGGGGGA-GCGTTAATGGAGCGGCCGATATCTGATTAGCTAGTTGGTGGGGTAAAGGCCTACCAAGGCGACGATCAGTAGCTGGTCTGAGAGGACGACCAGCCACACTGGAACTGAGACACGGTCCAG	0.824344	1.33243	0.659522	0.491573	1.05837	0.844202	1.81291	1.02587	1.04889	0.721154	0.806156	1.13236	0.927812	0.771917	0.734004	0.428797	0.566572	0.473738	0.340881	0.389105	0.690193	0.416384	0.380654	0.418013	0.522325	0.386589	0.972486	0.94534	1.39838	0.866769	0.686433	0.701941	Bacteria	Proteobacteria	Betaproteobacteria	Methylophilales	Methylophilaceae	un_Methylophilaceae
13	GATGAACGCTAGCGGCAGGCCTAACACATGCAAGTCGAGGGGCAGCGGGAAGGGGCTCGCCCTTTTGCCGGCGACCGGCGCACGGGTGCGCAGCGCGTATGGAACCTGCCCTTTACAGGG-GCGGTAAAGGATGGCCATGCGTCCCATTAGCTAGTTGGTGCGGTAACGGCGCACCAAGGCCGCGATGGGTAGGGGCCCTGAGAGGGGGATCCCCCACACTGGTACTGAGACACGGACCAG	0.254427	0.252994	0.353315	0.265293	0.282232	0.166818	0.193377	0.254274	0.871111	0.684172	0.732869	0.654253	0.882553	0.680022	1.09303	1.15098	1.13314	0.865088	0.73046	0.856031	1.13548	1.08454	0.996417	1.22237	1.00253	1.23708	0.984345	1.00594	1.01987	0.97162	1.16521	1.02637	Bacteria	Bacteroidetes	Flavobacteria	Flavobacteriales	Flavobacteriaceae	un_Flavobacteriaceae
14	GACGAACGCTGGCGGCGTGCTTAACACATGCAAGTCGAGGGCACTCCTTCGGGGGTGACCGGCGAACGGGTGCGTAACACGTGAGCAACCTGCCCGCTTGTGGGGAATAGCCGGCCCAAC-GCGCAGGCGGAGGGGCTCGCGGCCTATCAGCTAGTTGGTGCGGTAACGGCGCACCAAGGCAGTGACGGGTAGCTGGTCTGAGAGGATGGCCAGCCACATTGGGACTTAGACACGGCCCAG	0.132302	0.337325	0.0706631	0.22628	0.10263	0.106157	0.136975	0.0964489	0.337778	0.351331	0.329791	0.301963	0.316814	0.294064	1.06909	1.10585	0.897073	1.27703	1.19308	1.05837	1.38039	1.05549	1.41066	1.22237	1.0615	0.801293	1.18596	0.908981	0.767532	0.873759	0.917167	0.955583	Bacteria	Gemmatimonadetes	Gemmatimonadetes	Gemmatimonadales	Gemmatimonadaceae	Gemmatimonas
15	GATGAACGCTGGCGGCGTGCCTTAGACATGCAAGTCGAACGAAGCACCTTTCTCCGATCGCTTCGGTGTGAGGAGACTGGTGACTTAGTGGCGAACGGGTGAGTAACACGTGAGTGACCT-TCGCTTCGGGATGGGCTCGCGGTCCATCAGCTAGTTGGTAGGGTAATGGCCTACCAAGGCGACGACGGATAGCCGGCCTGAGAGGGTGTACGGCCACAGGGGCACTGAGACACGGGCCCC	1.28231	1.23124	0.895065	0.990949	0.859525	0.778485	0.644589	1.0171	0.577778	0.850592	1.20923	0.931052	0.724146	0.955707	0.534546	0.451365	0.566572	0.556128	0.535671	0.88716	0.556607	0.639101	0.626959	0.66502	0.766639	0.829409	0.450664	0.436311	0.641363	0.489305	0.392247	0.330325	Bacteria	Deinococcus-Thermus	Deinococci	Deinococcales	Trueperaceae	Truepera
16	GACGAACGCTGGCGGCGTGCCTAACACATGCAAGTCGAGCGAGGACAGTCCTTCGGGGCTGAGCCGAGCGGCGGACGGGTGCGTAACACGTGAGCAACCTGTCTCCGTGCGGGGGATAAC-TCGTGCGGAGAGGGGCTCGCGGGCTATCAGCTGGTTGGTGAGGTAATGGCTCACCAAGGCGACGACGGCTAGGGGGTCTGAGAGGACGACCCCCCACATTGGAACTGAGACACGGTCCAG	0.17301	0.101198	0.400424	0.374532	0.269403	0.212314	0.0886311	0.113985	1.09333	0.887574	1.57567	1.384	1.01833	1.28653	1.2127	0.868878	1.51086	1.25644	1.19308	1.05837	0.9351	0.697202	0.929243	0.950029	0.834035	1.13165	0.391366	0.387832	0.441594	0.475325	0.478772	0.48369	Bacteria	un_Bacteria	un_Bacteria	un_Bacteria	un_Bacteria	un_Bacteria
17	AACGAACGTTAGCGGCGCGCCTAACACATGCAAGTCGAGCGATAAGCCTTCGGGCCGAAAGCGGCGCACGGGTGAGTAACACGTAGATAACCTACCCTCGAGTGGTGGATAACGTTCCGA-GCGCTTGAGGACGGGTCTGCGGCCCATCAGTTAGTTGGTAGTGTAATAGACTACCAAGGCTAAGACGGGTAGCTGGTCTGAGAGGATGAACAGCCACACTGGAACTGAGACACGGTCCAG	0.0610625	0.0168663	2.20233	0.5696	3.69468	1.55697	1.62759	1.2626	0	0	0.0183217	0.0251636	0.0226296	0	0.32711	0.146694	0.141643	0.0823893	0.0243487	0.108949	0.478682	0.348601	0.167936	0.133004	0.143218	0.161664	0.355787	0.387832	0.441594	0.440375	0.201892	0.21825	Bacteria	Proteobacteria	Deltaproteobacteria	Myxococcales	un_Myxococcales	un_Myxococcales
18	GACGAACGCTGGCGGCGTGCCTAATGCATGCAAGTCGAGCGACGCATACTGGAGGGGTAACCCACCGGTATGACGGAGCGGCGAACGGGTGAGTAACACGTGAGTAACCTACCCCGAAGA-GCGCTTCGGGATGGGCTCGCGGCCTATCAGCTAGTTGGTGGGGTAACGGCCCACCAAGGCTTTGACGGGTAGCTGGTCTGAGAGGACGATCAGCCACACTGGGACTGAGACACGGCCCAG	0.407083	0.387924	0.45931	0.429151	0.295061	0.369022	0.241721	0.45594	1.05778	0.906065	1.41077	1.03171	1.222	1.0476	0.614329	0.643196	0.613787	0.720906	0.438276	0.793774	0.378493	0.600368	0.492611	0.696688	0.564448	1.01216	0.664137	0.630227	0.294396	0.664057	0.651823	0.83761	Bacteria	Actinobacteria	Actinobacteria	un_Actinobacteria	un_Actinobacteria	un_Actinobacteria
19	GATGAACGCTGGCGGCGTGCCTAAGACATGCAAGTCGAACGAAGCATCGATCTTGGATCCCTTCGGGGTGAAGAGGTCGATGACTTAGTGGCGAACGGGTGAGTAACACGTGAGTGACCT-TCGCTTCGGGATGGGCTCGCGGTCCATCAGCTAGTTGGTAGGGTAATGGCCTACCAAGGCTACGACGGATAGCCGGCCTGAGAGGGTGTACGGCCACAGGGGCACTGAGACACGGGCCCC	1.96418	2.10828	1.28371	1.10799	0.782553	0.626832	0.539844	0.692679	0.248889	0.33284	0.659582	0.603926	0.565739	0.569748	0.271262	0.146694	0.283286	0.329557	0.36523	0.560311	0.512078	0.435751	0.335871	0.23434	0.261163	0.548253	0.27277	0.46055	0.441594	0.293583	0.282649	0.129771	Bacteria	Deinococcus-Thermus	Deinococci	un_Deinococci	un_Deinococci	un_Deinococci
20	GACGAACGCTGGCGGCGTGCTTAACACATGCAAGTCGAACGATGATCCGGTGCTTGCATCGGGGATTAGTGGCGAACGGGTGAGTAACACGTGAGTAACCTGCCCTGGACTCTGGGATAA-TCGGTTTGGGATGGACTCGCGGCCTATCAGCTTGTTGGTGAGGTAATGGCTCACCAAGGCGTCGACGGGTAGCCGGCCTGAGAGGGTGACCGGCCACACTGGGACTGAGACACGGCCCAG	0.24425	0.168663	0.235544	0.280899	0.166774	0.384188	0.257836	0.429636	0.328889	0.295858	0.403078	0.276799	0.384702	0.349201	0.74996	0.688332	0.802644	0.782698	0.949598	1.08949	0.67906	0.958652	0.727721	1.0007	0.834035	1.20897	1.04364	0.908981	0.73599	1.20928	1.30365	1.3272	Bacteria	Actinobacteria	Actinobacteria	Actinomycetales	Microbacteriaceae	Agromyces
21	GATGAACGCTAGCGGGAGGCTTAATACATGCAAGTCGTACGGTAACAGTCTCGGCCTAGCCGAGAGCTGACGAGTGGCGGACGGGTGAGTAACGCGTACACGATCTACCTATAAGTCTGG-CTGCTTATAGATGGGTGTGCGTCCTATTAGTTAGTTGGTGAGGTAACGGCTCACCAAGACGATGATAGGTAGGGGGCGTGAGAGCGTGGACCCCCACACGGGTACTGAGACACGGACCCG	0.447792	0.590319	0.341538	0.280899	0.339962	0.2477	0.0886311	0.0964489	0.871111	0.943047	0.696226	0.805234	0.543109	1.0476	0.558481	0.65448	0.75543	0.576725	0.608717	0.731518	0.667928	0.571318	0.615764	0.696688	0.749789	0.590427	0.320209	0.181796	0.346967	0.279603	0.363406	0.436501	Bacteria	Bacteroidetes	Sphingobacteria	Sphingobacteriales	Saprospiraceae	Haliscomenobacter
22	GACGAACGCTGGCGGCGCGCTTAACACATGCAAGTCGAACGGGCGTCTTCGGGCGTCAGTGGCGGACGGGTGCGTAACACGTGAGCAACCTACCTGGAGTTGGGGGATAACCTCGGGAAA-CTGACTCGAGAGGGGCTCGCGGCGTATCAGCTAGCTGGTGAGGTAACGGCTCACCAGGGCGATGACGCGTAGGGGGTCTGAGAGGATGGCCCCCCACATTGGGACTGAGATACGGCCCAG	0.203542	0.101198	0.247321	0.22628	0.237332	0.202204	0.61236	0.59623	0.16	0.147929	0.274826	0.150981	0.181036	0.238927	0.486676	0.586775	0.566572	0.494336	0.462625	0.420233	0.701325	0.697202	0.526198	0.608018	0.673968	0.484993	1.12666	1.01806	0.998843	0.726968	0.703738	0.831711	Bacteria	Gemmatimonadetes	Gemmatimonadetes	Gemmatimonadales	Gemmatimonadaceae	Gemmatimonas
23	ATTGAACGCTAGCGGGATGCTTTACACATGCAAGTCGAACGGCAGCGCGGGTCTTCGGACCTGGCGGCGAGTGGCGAACGGGTGAGTAATATATCGGAACGTGCCCAGTAGCGGGGGATA-TCACTATTGGAGCGGCCGATATCGGATTAGCTAGTTGGTGAGGTAAAGGCTCACCAAGGCTGCGATCCGTAGCTGGTTTGAGAGGACGACCAGCCACACTGGGACTGAGACACGGCCCAG	1.66904	1.16377	0.883288	1.02996	0.647851	0.859367	0.499557	0.727751	0.551111	0.795118	0.659582	0.35229	0.52048	0.441095	0.287219	0.32724	0.314762	0.205973	0.438276	0.373541	0.3117	0.416384	0.447828	0.373678	0.404381	0.344416	0.177894	0.193916	0.389023	0.244653	0.357637	0.330325	Bacteria	Proteobacteria	Betaproteobacteria	Burkholderiales	Alcaligenaceae	Pusillimonas
24	GATGAACGCTAGCGGCAGGCCTAATACATGCAAGCCGAACGGTAAGATTGGTAGCAATACTGATCTGAGAGTGGCGTACGGGTGCGTAACACGTATGCAACCTACCCAGAACTGGAGGAT-GTGGTTCTGGATGGGCATGCGCATGATTAGTTAGTTGGTAGTGTAACGGACTACCAAGACGATGATCATTAGGGGACCTGAGAGGGTGATCCCCCACACTGGCACTGAGATACGGGCCAG	0.101771	0.26986	0.0706631	0.0702247	0.14753	0.0707714	0.0966884	0.219202	1.04889	1.05399	0.971052	1.15752	1.13148	1.0476	0.550503	0.496502	0.645263	0.432544	0.36523	0.59144	0.445286	0.610051	0.593372	0.690354	0.539174	0.44282	0.604839	0.593867	0.567764	0.629107	0.657591	0.595765	Bacteria	Bacteroidetes	Bacteroidetes_i.s.	Bacteroidetes_i.s.	Bacteroidetes_i.s.	Ohtaekwangia
25	GATGAACGCTAGCGGCAGGCCTAATACATGCAAGTCGAACGGTAAGTTTTCTTTCGGGAAGACACGAGTGGCGAACGGGTGCGTAACGCGTATGCAACCTGGCCCTTACTGGGGGATAGC-TCGGTAAGGGATGGGCATGCGTGCCATTAGCTAGTTGGTAGTGTAACGGACTACCAAGGCAACGATGGCTAGGGGGTCTGAGAGGATGATCCCCCACACTGGTACTGAGATACGGACCAG	2.4425	1.5517	1.26016	0.889513	0.788967	0.556061	0.564016	0.420868	0.746667	0.462278	0.366435	0.301963	0.407332	0.441095	0.382958	0.428797	0.361977	0.391349	0.243487	0.357977	0.300568	0.222717	0.324675	0.32301	0.269587	0.295213	0.189753	0.133317	0.241825	0.202712	0.10383	0.147467	Bacteria	Bacteroidetes	Sphingobacteria	Sphingobacteriales	Flammeovirgaceae	un_Flammeovirgaceae
26	AACGAACGTTAGCGGCGCGCTTAATACATGCAAGTCGAGCGAGAAAGGGCTTCGGCCCCAGTAAAGCGGCGCACGGGTGAGTAACACGTAGGTAATCTACCCTCGGGTGGTGGATAACAT-GCGCCTGAGGATGAGCCTGCGGCGCATCAGCTTGTTGGTAGGGTAATAGCCTACCAAGGCTAAGACGCGTAGCTGGTCTGAGAGGATGAACAGCCACACTGGAACTGAGACACGGTCCAG	0.142479	0.067465	0.777294	0.48377	2.62348	1.46092	1.76456	1.09601	0	0	0	0.0251636	0.0226296	0	0.103718	0.13541	0.0786906	0.0411946	0.073046	0	0.356228	0.213034	0.246305	0.0823358	0.0673968	0.0984044	0.201613	0.363592	0.367995	0.216692	0.20766	0.212352	Bacteria	Proteobacteria	Deltaproteobacteria	Myxococcales	un_Myxococcales	un_Myxococcales
27	AACGAACGTTAGCGGCGCGCCTAAGACATGCAAGTCGAGCGAGAAAGGGCTTCGGCCCCAGTAAAGCGGCGCACGGGTGAGTAACACGTAGGTCATCAACCCTCGAGTGGTGGACAACTC-CGCTTGAGGATGAGCCTGCGGCCCATCAGCTAGTTGGTTGGGGTAATGGCCCACCAAGGCATAGACGGGTAGCTGGTCTGAGAGGATGAACAGCCACACTGGAACTGAGACACGGTCCAG	0.0305312	0.0168663	0.317984	0.062422	1.36626	0.283086	5.34204	1.79746	0	0	0	0	0	0	0.0239349	0.0225683	0	0	0	0	0.100189	0.1162	0.0447828	0.00633352	0.0168492	0.0351444	0.640417	0.436311	0.704447	0.202712	0.294186	0.194656	Bacteria	Proteobacteria	Deltaproteobacteria	Myxococcales	un_Myxococcales	un_Myxococcales
28	AGTGAACGCTGGCGGTAGGCCTAACACATGCAAGTCGAACGGCAGCACAAGGGAGCTTGCTCCCTGGGTGGCGAGTGGCGGACGGGTGAGGAATACATCGGAATCTACCCTGTCGTGGGG-ACGCGATTGGATGAGCCGATGTCGGATTAGCTTGTTGGCGGGGTAAAAGCCCACCAAGGCGACGATCCGTAGCTGGTCTGAGAGGATGATCAGCCACACTGGGACTGAGACACGGCCCAG	0.305312	0.236128	0.859734	1.147	0.955741	1.59741	0.547901	0.569925	0.151111	0.0554734	0.201539	0.100654	0.0226296	0.0735159	0.42285	0.406229	0.409191	0.679712	0.438276	0.513619	0.478682	0.474484	0.660546	0.608018	0.673968	0.681802	0.415085	0.399952	0.588792	0.230672	0.351869	0.39521	Bacteria	Proteobacteria	Gammaproteobacteria	Xanthomonadales	Xanthomonadaceae	Luteimonas
29	AGTGAACGCTGGCGGCAGGCCTAACACATGCAAGTCGAACGGCAGCACAAGGGAGCTTGCTCCCTGGGTGGCGAGTGGCGGACGGGTGAGGAATACATCGGAATCTGCCCAGTCGTGGGG-GCGCGATTGGATGAGCCGATGTCGGATTAGCTTGTTGGCGGGGTAACGGCCCACCAAGGCGACGATCCGTAGCTGGTCTGAGAGGATGATCAGCCACACTGGAACTGAGACACGGTCCAG	0.437614	0.53972	1.01284	1.02996	1.03271	1.26883	0.507614	0.420868	0.382222	0.277367	0.403078	0.402617	0.339443	0.165411	0.710069	0.609343	0.802644	1.15345	0.852204	0.918288	0.857175	0.687518	0.817286	0.658686	0.741365	0.745062	0.521822	0.581748	0.620334	0.468335	0.415321	0.465994	Bacteria	Proteobacteria	Gammaproteobacteria	Xanthomonadales	Xanthomonadaceae	Luteimonas
30	AGTGAACGCTGGCGGCAGGCCTAACACATGCAAGTCGAACGGCAGCACAGGAGAGCTTGCTCTCTGGGTGGCGAGTGGCGGACGGGTGAGGAATACATCGGAATCTACCTATACGTGGGG-GCGCGGATAGATGAGCCGATGTCCGATTAGCTAGTTGGCGGGGTAATGGCCCACCAAGGCGACGATCGGTAGCTGGTCTGAGAGGATGATCAGCCACACTGGAACTGAGACACGGTCCAG	0.742927	0.590319	1.02461	1.52154	1.27646	1.78445	0.410926	0.561157	0.284444	0.184911	0.293148	0.251636	0.226296	0.294064	0.518589	0.496502	0.519358	0.411946	0.633065	0.638132	0.545475	0.455118	0.526198	0.538349	0.564448	0.534196	0.249051	0.230275	0.147198	0.370474	0.317259	0.271338	Bacteria	Proteobacteria	Gammaproteobacteria	Xanthomonadales	Xanthomonadaceae	Luteimonas
31	AACGAACGTTAGCGGCGCGCTTAACACATGCAAGTCGAGCGATAAATCCTTCGGGATGGAAAGCGGCGCACGGGTGAGTAACACGTAGATAATCTACCCTCGAGTGGTGGATAACGTTCC-CCGCTTGAGGATGAGTCTGCGGCCCATCAGCTTGTTGGTAGTGTAAAGGACTACCAAGGCAAAGACGGGTAGCTGGTCTGAGAGGATGAACAGCCACACTGGAACTGAGACACGGTCCAG	0.519031	0.775848	1.24838	1.11579	0.96857	1.22333	0.330352	0.210434	0.0355556	0.0554734	0.0366435	0.176145	0.113148	0.110274	0.303175	0.248251	0.236072	0.144181	0.267835	0.29572	0.356228	0.387334	0.31348	0.310343	0.278012	0.365502	0.201613	0.218155	0.136684	0.146792	0.201892	0.188757	Bacteria	Proteobacteria	Deltaproteobacteria	Myxococcales	Polyangiaceae	un_Polyangiaceae
32	GACGAACGCTGGCGGCGGGCTTAACACATGCAAGTCGGACGCTCCGGTTTTGGCCGGGGCGTGGCGCACGGGTGCGTAACACGTAGGTAACCTGCCCTCGAGTGGGGAATAACCCCGGGA-GCGCTCGGGGATGGGCCTGCGGCGGATTAGGTAGTTGGTGGGGTAAGGGCCTACCAAGCCTGCGATCCGTAGCTGGTCTGAGAGGATGATCAGCCACACTGGCACTGAGACACGGGCCAG	0.0305312	0.0337325	0.0353315	0.031211	0.10263	0	0.0402868	0.0876808	1.03111	0.739645	1.22756	1.1072	0.814664	1.01084	0.398915	0.65448	0.629525	0.556128	0.340881	0.420233	0.278303	0.455118	0.369458	0.595351	0.589722	0.534196	0.474383	0.424191	0.262854	0.447365	0.536456	0.560373	Bacteria	un_Bacteria	un_Bacteria	un_Bacteria	un_Bacteria	un_Bacteria
33	ATTGAACGCTGGCGGCATGCCTAACACATGCAAGTCGAACGGTAACAGGCCCTTCGGGGTGCTGACGAGTGGCGAACGGGTGAGTAATGCGTAGGAATCTACCCAGTAGTGGGGGATAAC-GCGCTATTGGATGAGCCTACGTCGGATTAGCTAGTTGGTGGGGTAATGGCCTACCAAGGCGACGATCCGTAGCTGGTCTGAGAGGACGATCAGCCACACTGGGACTGAGACACGGCCCAG	0.73275	1.09631	0.471087	0.593009	0.545221	0.540896	0.394811	0.315651	0.48	0.628698	0.641261	0.754907	0.701516	0.771917	0.414872	0.372376	0.393453	0.391349	0.486973	0.155642	0.445286	0.358284	0.403045	0.304009	0.294861	0.323329	0.237192	0.315113	0.325938	0.405424	0.271112	0.30673	Bacteria	Proteobacteria	Gammaproteobacteria	un_Gammaproteobacteria	un_Gammaproteobacteria	un_Gammaproteobacteria
34	GATGAACGCTAGCGGGAGGCTTAATACATGCAAGTCGAGGGAGAATTCCGATTTCGGTTGGAAGGAAACCGGCGCACGGGTGAGTAACACGTACACAACTTGCCCCTAACTGGGAGATAG-GCGGTTAGGGATAGGTGTGCGTCTGATTAGCTAGTTGGTGAGGTAACGGCTCACCAAGGCGACGATCAGTAGGGGGCGTGAGAGCGTGATCCCCCACACGGGTACTGAGACACGGACCCG	0.549562	0.607185	0.188435	0.163858	0.198845	0.126378	0.104746	0.0701447	1.00444	0.906065	0.677904	1.00654	1.17674	1.1395	0.32711	0.51907	0.346239	0.391349	0.170441	0.311284	0.322832	0.348601	0.302284	0.418013	0.328559	0.246011	0.29649	0.242395	0.325938	0.293583	0.351869	0.300832	Bacteria	Bacteroidetes	Sphingobacteria	Sphingobacteriales	Saprospiraceae	un_Saprospiraceae
35	ATTGAACGCTGGCGGCATGCCTTACACATGCAAGTCGAACGGTAACAGGGGCTTCGGCCCGCTGACGAGTGGCGGACGGGTGAGTAATGCATCGGAATGTACCCAGTAGTGGGGGATAGC-GCGCTATTGGAGCAGCCGATGTCAGATTAGCTAGTTGGTAGGGTAAGGGCCTACCAAGGCTACGATCTGTAACTGGTCTGAGAGGACGACCAGTCACACTGGGACTGAGACACGGCCCAG	1.51639	1.61916	0.789071	0.62422	0.55805	0.636943	0.370639	0.543621	0.311111	0.49926	0.366435	0.528435	0.429962	0.459474	0.0638264	0.203114	0.236072	0.226571	0.389579	0.217899	0.333964	0.242084	0.190327	0.152005	0.261163	0.18978	0.367647	0.145437	0.231311	0.195722	0.178819	0.159264	Bacteria	Proteobacteria	Betaproteobacteria	Burkholderiales	un_Burkholderiales	un_Burkholderiales
36	ATTGAACGCTGGCGGCGTGCCTAACACATGCAAGTCGAGCGGCAGCGCGGGGGCAACCCTGGCGGCGAGCGGCGGACGGGTGAGTAACGCTTGGGAATCTGCCTGTTAGTGGGGGATAAC-GCGCTAACAGATGAGCCCAAGTCGGATTAGCTAGTTGGTAGGGTAATGGCCTACCAAGGCTACGATCCGTAGCTGGTCTGAGAGGACGACCAGCCACACTGGGACTGAGACACGGCCCAG	0.366375	0.472255	0.471087	0.374532	0.583708	0.647053	0.298123	0.324419	0.72	0.536243	0.677904	0.70458	0.543109	0.514611	0.247327	0.440081	0.3305	0.411946	0.170441	0.217899	0.367361	0.406701	0.335871	0.310343	0.252738	0.400647	0.260911	0.230275	0.241825	0.335524	0.317259	0.200554	Bacteria	Proteobacteria	Gammaproteobacteria	Xanthomonadales	Sinobacteraceae	Steroidobacter
37	AATCAACGCTGGCGGCGTGCCTCAGACATGCAAGTCGAACGCGAAAGTTTCCTTCGGGAGACAAGTAGAGTGGCGCACGGGTGAGTAACACGTAGGTAATCTACCTTTGGATGGGGAATA-GCGTCTAAAGAGGAGCCTGCGGCGGATTAGCTAGTTGGTAAGGTAATGGCTTACCAAGGCTACGATCCGTAACCGGCCTGAGAGGGCGGTCGGTCACACTGACACTGACATACGGGTCAG	0.132302	0.13493	0.176658	0.234082	0.186017	0.146598	0.225606	0.210434	0.613333	0.517751	0.4214	0.377453	0.407332	0.367579	0.430828	0.473934	0.456405	0.30896	0.36523	0.357977	0.445286	0.522901	0.548589	0.443347	0.598147	0.358473	0.332068	0.290874	0.420566	0.272613	0.357637	0.401109	Bacteria	Acidobacteria	Acidobacteria_Gp4	Acidobacteria_Gp4	Acidobacteria_Gp4	Gp4
38	GATGAACGCTGGCGGCGTGCCTAACACATGCAAGTCGAACGATCCTTCGGGATAGTGGCGCACGGGTGAGTAACACGTAGCTAATCTGCCCTCAAGACAGGGATAACTGTAGGAAACTAC-GCGCTTGAGGATGAGGCTGCGAGCCATCAGCTAGTTGGTGAGGTAAAAGCTCACCAAGGCAGCGACGGCTAGGGGACCTGAGAGGGTGACCCCCCACACTGGGACTGAGACACGGCCCAG	0.223896	0.387924	0.447533	0.304307	1.12251	0.717824	2.34469	1.44673	0	0	0.0183217	0.0503271	0	0.018379	0.0718047	0.0564207	0.125905	0.164779	0.0973947	0.077821	0.189246	0.0677835	0.167936	0.145671	0.0926706	0.0773178	0.260911	0.375712	0.462622	0.377464	0.236502	0.359818	Bacteria	Chloroflexi	Anaerolineae	Anaerolineales	Anaerolineaceae	un_Anaerolineaceae
39	AACGAACGCTGGCGGCATGCTTAACACATGCAAGTCGAACGAGATCTTCGGATCTAGTGGCGCACGGGTGCGTAACGCGTGGGGATCTACCATAGGGTACGGAATAACTCAGAGAAATTT-TCGCCCTTTGATGAACCCGCGTAAGATTAGCTAGTTGGTGTGGTAAAGGCTCACCAAGGCGACGATCTTTAGCTGGTCTGAGAGGATGATCAGCCACACTGGGACTGAGACACGGCCCAG	0.519031	0.708383	0.341538	0.39794	0.339962	0.338692	0.265893	0.219202	0.595556	0.33284	0.494687	0.301963	0.610998	0.422716	0.622307	0.507786	0.645263	0.865088	0.803506	0.809339	0.790382	0.397018	0.593372	0.544683	0.648694	0.267098	0.320209	0.315113	0.473136	0.510275	0.386479	0.454197	Bacteria	Proteobacteria	Alphaproteobacteria	Sphingomonadales	Sphingomonadaceae	Sphingopyxis
40	GACGAACGCTGGCGGCGTGCTTAACACATGCAAGTCGAACGATGAACTCCAGCTTGCTGGGGGGATTAGTGGCGAACGGGTGAGTAACACGTGAGTAACCTGCCCTGGACTCTGGGATAA-TCGGTTTGGGATGGACTCGCGGCCTATCAGCTTGTTGGTGAGGTAATGGCTCACCAAGGCGTCGACGGGTAGCCGGCCTGAGAGGGTGACCGGCCACACTGGGACTGAGACACGGCCCAG	0.193365	0.168663	0.153103	0.249688	0.121873	0.262865	0.128918	0.464708	0.124444	0.129438	0.183217	0.125818	0.0678887	0.128653	0.343067	0.214399	0.157381	0.576725	0.657414	0.638132	0.189246	0.348601	0.111957	0.468681	0.328559	0.794264	0.29649	0.302994	0.115656	0.587166	0.87102	0.648853	Bacteria	Actinobacteria	Actinobacteria	Actinomycetales	Microbacteriaceae	Agromyces
41	GACGAACGCTGGCGGCGTGCTTAACACATGCAAGTCGAGGGGTCTGGCTTCGGCCAGGCACCGGCGAACGGGTGCGTAACACGTGAGCAACCTGCCCGCTTGTGGGGGATAGCCGGCCCA-GCGCAGGCGGAGGGGCTCGCGGCCTATCAGCTTGTTGGTGGGGTAACGGCCCACCAAGGCGACGACGGGTAGCTGGTCTGAGAGGATGGCCAGCCACATTGGGACTGAGAGACGGCCCAG	0.0508854	0.067465	0.0117772	0.031211	0.0449006	0.0202204	0.0161147	0.0350723	0.488889	0.406805	1.17259	0.70458	0.588368	0.606506	0.486676	0.32724	0.550834	0.556128	0.292184	0.560311	0.712457	0.484168	0.570981	0.487681	0.379107	0.407676	0.415085	0.412071	0.325938	0.433385	0.323027	0.324426	Bacteria	Gemmatimonadetes	Gemmatimonadetes	Gemmatimonadales	Gemmatimonadaceae	Gemmatimonas
42	GATGAACGCTAGCGGCAGGCCTAACACATGCAAGTCGAGGGGTAACGGGGTGCTTGCACCGCCGACGACCGGCGCACGGGTGAGCAACGCGTATAGAACCTACCCGTTACAGGGGGATAG-TCGGTAACGGATGGCTATGCGTCCCATTAGTTAGTTGGTAGGGTAACGGCCTACCAAGACGGCGATGGGTAGGGGCCCTGAGAGGGGGATCCCCCACACTGGTACTGAGACACGGACCAG	0.773458	0.438523	0.635967	0.616417	0.327133	0.283086	0.298123	0.377028	0.711111	0.628698	0.732869	0.830398	0.724146	0.863812	0.74996	0.65448	0.50362	0.720906	0.633065	0.622568	0.46755	0.532584	0.414241	0.538349	0.648694	0.590427	0.355787	0.363592	0.367995	0.426395	0.467236	0.430602	Bacteria	Bacteroidetes	Flavobacteria	Flavobacteriales	Flavobacteriaceae	Arenibacter
43	AGTGAACGCTGGCGGCAGGCCTAACACATGCAAGTCGAGCGGTAACAGGAGAGAGCTTGCTCTCTTGCTGACGAGCGGCGGACGGGTGAGTAATGCATCGGAATCTGCCCTGACGTGGGG-GCGCGGCAGGATGAGCCGATGTTCGATTAGCTAGTTGGAGGGGTAAAGGCCCACCAAGGCGACGATCGATAGCCGGTCTGAGAGGATGATCGGCCACACTGGGACTGAGACACGGCCCAG	0.111948	0.151796	0.247321	0.280899	0.269403	0.394298	0.177262	0.0964489	0.151111	0.16642	0.0549652	0.0754907	0.203666	0.18379	0.502633	0.530354	0.58231	0.700309	0.608717	0.575875	0.411889	0.397018	0.425437	0.690354	0.387532	0.555282	0.308349	0.206036	0.43108	0.335524	0.328796	0.26544	Bacteria	Proteobacteria	Gammaproteobacteria	Xanthomonadales	Xanthomonadaceae	Luteimonas
44	AACGAACGCTGGCGGCATGCCTAACACATGCAAGTCGAACGAGCTCTTCGGAGCTAGTGGCGCACGGGTGCGTAACGCGTGGGAACCTGCCCTTAGGTTCGGAATAACTCCCCGAAAGGG-TCGCCTTTGGATGGGCCCGCGTTGGATTAGCTAGTTGGTGGGGTAAAGGCCTACCAAGGCGACGATCCATAGCTGGTCTTAGAGGATGATCAGCCACACTGGGACTGAGACACGGCCCAG	0.142479	0.118064	0.176658	0.366729	0.256575	0.131433	0.378696	0.315651	0.133333	0.0924556	0.146574	0.226472	0.113148	0.128653	0.542524	0.598059	0.50362	0.61792	0.413927	0.715953	0.534343	0.406701	0.660546	0.34201	0.370682	0.274127	0.498102	0.399952	0.536221	0.405424	0.490309	0.513184	Bacteria	Proteobacteria	Alphaproteobacteria	Sphingomonadales	Erythrobacteraceae	Altererythrobacter
45	ATTGAACGCTAGCGGGATGCTTTACACATGCAAGTCGAACGGCAGCGCGGAACTTCGGTTCTGGCGGCGAGTGGCGAACGGGTGAGTAATATATCGGAACGTGCCCAGTAGCGGGGGATA-TCACTATTGGAGCGGCCGATATCAGATTAGCTAGTTGGTGAGGTAAAGGCTCACCAAGGCCGCGATCTGTAGCTGGTTTGAGAGGACGACCAGCCACACTGGGACTGAGACACGGCCCAG	0.997354	0.80958	0.683076	0.671036	0.468249	0.434739	0.435098	0.499781	0.311111	0.314349	0.164896	0.100654	0.158407	0.220548	0.263284	0.282103	0.236072	0.205973	0.340881	0.217899	0.222643	0.232401	0.15674	0.23434	0.294861	0.217896	0.201613	0.230275	0.189255	0.258633	0.17305	0.188757	Bacteria	Proteobacteria	Betaproteobacteria	Burkholderiales	Alcaligenaceae	Pusillimonas
46	ATTGAACGCTGGCGGCATGCCTTACACATGCAAGTCGAACGGCAGCACGGGGGGTAACCCCTGGTGGCGAGTGGCGAACGGGTGAGTAATGTATCGGAACGTGTCCTGTAGCGGGGGATA-GCACTATAGGAGCGGCCGATATCGGATTAGCTAGTTGGCGGGGTAATGGCCCACCAAGGCGACGATCCGTAGCTGGTCTGAGAGGACGACCAGCCACACTGGAACTGAGACACGGTCCAG	0.0101771	0.0505988	0.317984	0.280899	0.442591	0.379133	0.749335	0.8242	0.00888889	0	0	0	0	0	0.207436	0.293387	0.299024	0.30896	0.146092	0.155642	0.333964	0.358284	0.347067	0.34201	0.286436	0.302242	0.604839	0.605987	0.788561	0.531246	0.536456	0.566271	Bacteria	Proteobacteria	Betaproteobacteria	un_Betaproteobacteria	un_Betaproteobacteria	un_Betaproteobacteria
47	AACGAACGCTGGCGGCAGGCTTAACACATGCAAGTCGAGCGCCCCGCAAGGGGAGCGGCAGACGGGTGAGTAACGCGTGGGAATCTACCCATCTCTACGGAATAACCCAGGGAAACTTGG-TCGGAGATGGATGAGCCCGCGTTGGATTAGCTAGTTGGTGGGGTAATGGCCTACCAAGGCGACGATCCATAGCTGGTCTGAGAGGATGATCAGCCACACTGGGACTGAGACACGGCCCAG	0.346021	0.421656	0.37687	0.405743	0.327133	0.358912	0.805737	0.762823	0.364444	0.351331	0.311469	0.402617	0.339443	0.294064	0.502633	0.349808	0.456405	0.30896	0.633065	0.622568	0.556607	0.455118	0.335871	0.513015	0.606571	0.463907	0.652277	0.581748	0.483651	0.678037	0.617213	0.642954	Bacteria	Proteobacteria	Alphaproteobacteria	Rhizobiales	Phyllobacteriaceae	un_Phyllobacteriaceae
48	ATTGAACGCTGGCGGCGTGCCTAACACATGCAAGTCGAGCGGCAGCGCGGGAGCAATCCTGGCGGCGAGCGGCGGACGGGTGAGTAACGCTTGGGAATCTGCCTATCAGTGGGGGACAAC-GCGCTGATAGATGAGCCCAAGTCGGATTAGCTAGTTGGTAGGGTAATGGCCTACCAAGGCTACGATCCGTAACTGGTCTGAGAGGACGACCAGTCACACCGGAACTGAGACACGGTCCGG	0.0101771	0.0168663	0.0588859	0.546192	0.0577293	1.80467	0.0322295	0.675142	0	0	0	0	0	0.018379	0.0239349	0.0451365	0.0472144	0.226571	0.194789	0.124514	0.0556607	0.0484168	0.0111957	0.468681	0.471778	0.520138	0.0355787	0.048479	0.0315424	0.433385	0.392247	0.407008	Bacteria	Proteobacteria	Gammaproteobacteria	Xanthomonadales	Sinobacteraceae	Steroidobacter
49	AACGAACGTTAGCGGCGCGCTTAACACATGCAAGTCGAACGAGAAAGGGTGCCTTCGGGTACCCCGGTAAAGTGGCGCACGGGTGAGTAACACGTGGGTAACCTACCCCCGGGCGGGGGA-ACACCTGGGGATGGGCCCGCGGCCCATCAGGTTGTTGGTGGGGTAACGGCCTACCAAGCCTAAGACGGGTAGCTGGTCTGAGAGGATGATCAGCCACACTGGAACTGAGACACGGTCCAG	0.0915937	0.0843313	0.659522	0.17166	1.12893	0.399353	1.5873	1.29768	0.00888889	0	0	0	0	0	0.0558481	0.0789889	0.110167	0.0411946	0	0.0155642	0.15585	0.164617	0.212718	0.0570017	0.0758214	0.0562311	0.391366	0.424191	0.410052	0.300573	0.317259	0.253642	Bacteria	Proteobacteria	Deltaproteobacteria	Myxococcales	Polyangiaceae	un_Polyangiaceae
50	ATTGAACGCTGGCGGCATGCCTAACACATGCAAGTCGAACGGCAGCGCGGATAGCTTGCTATCTGGCGGCGAGTGGCGGACGGGTGAGTAATACATAGGAATCTGCCCAGTAGTGGGGGA-ACGCTATTGGATGAGCCTATGTCTGATTAGCTTGTTGGTGGGGTAACGGCCTACCAAGGCGACGATCAGTAGCTGGTCTGAGAGGACGATCAGCCACACCGGAACTGAGACACGGTCCGG	0.0407083	0.067465	0.0588859	0.0390137	0.275818	0.171873	0.789622	0.175362	0.0266667	0.0369822	0	0.0251636	0.0452591	0.018379	0.239349	0.293387	0.346239	0.164779	0.0486973	0.0933852	0.345096	0.455118	0.403045	0.23434	0.21904	0.154636	1.2334	1.27257	1.20913	0.433385	0.346101	0.359818	Bacteria	Proteobacteria	Gammaproteobacteria	un_Gammaproteobacteria	un_Gammaproteobacteria	un_Gammaproteobacteria
51	GATGAACGCTAGCGGCAGGCCTAACACATGCAAGTCGAACGGTAACAGTTCCTTCGGGAAGCTGACGAGTGGCGCACGGGTGCGTAACGCGTATGCAATCTACCTTTTACAGGGGGATAG-GCGGTAAAAGATGAGCATGCGTTCTATTAGCTAGTAGGTTTGGTAACGGCAGACCTAGGCGACGATAGATAGGGGCCCTGAGAGGGGGATCCCCCACACTGGTACTGAGACACGGACCAG	0.0203542	0.0843313	0.153103	0.117041	0.20526	0.212314	0.539844	0.4121	0.0355556	0.0739645	0.0916086	0.100654	0.0905182	0.0735159	0.199457	0.338524	0.299024	0.288363	0.146092	0.217899	0.423021	0.232401	0.425437	0.462347	0.252738	0.3163	0.474383	0.545388	0.73599	0.475325	0.467236	0.359818	Bacteria	Bacteroidetes	Flavobacteria	Flavobacteriales	Flavobacteriaceae	Winogradskyella
52	AACGAACGCTGGCGGCAGGCCTAACACATGCAAGTCGAGCGGACCCTTCGGGGTTAGCGGCAGACGGGTGAGTAACGCGTGGGAACCTACCCAGTGGTACGGAATAGCCCAGGGAAACTT-TCGCCATTGGATGGGCCCGCGTCGGATTAGCTAGTTGGTGGGGTAATGGCCTACCAAGGCGACGATCCGTAGCTGGTCTGAGAGGATGATCAGCCACACTGGGACTGAGACACGGCCCAG	0.702219	0.94451	0.518196	0.553995	0.288647	0.333637	0.394811	0.377028	0.782222	0.998521	1.08098	0.855561	0.9957	0.808675	0.47072	0.473934	0.456405	0.391349	0.36523	0.560311	0.144718	0.358284	0.190327	0.190006	0.269587	0.267098	0.320209	0.278754	0.105141	0.405424	0.455699	0.383413	Bacteria	Proteobacteria	Alphaproteobacteria	Rhizobiales	un_Rhizobiales	un_Rhizobiales
53	GAACAACGCTGGCGGCGTGCCTAATGCATGCAAGTCGTACGGGAGCCGCTTTGGCGGTCGACCGTGGCGGACGGGTGAGTAACACGTGGGTAACCTGCCCCGGCGCGGGGGATAACCGCG-CCGTGCCGGGAGGGGCCTGCGGCCTATCAGCTAGACGGTGGGGTAATGGCCTACCGTGGCGATGACGGGTAGCTGGTCTGAGAGGACGATCAGCCACACGGGGACTGAGACACGGCCCCG	0.478323	0.590319	0.518196	0.444757	0.224503	0.192094	0.120861	0.491013	0.444444	0.66568	0.586295	0.553598	0.678887	0.569748	0.382958	0.496502	0.25181	0.226571	0.633065	0.29572	0.233775	0.271134	0.23511	0.291342	0.227464	0.295213	0.308349	0.412071	0.147198	0.321543	0.328796	0.359818	Bacteria	Chloroflexi	Thermomicrobia	Sphaerobacterales	Sphaerobacteraceae	Sphaerobacter
54	AACGAACGTTAGCGGCGCGCTTAATACATGCAAGTCGAGCGAGAAAGGGCTTCGGCCCCAGTAAAGCGGCGCACGGGTGAGTAACACGTAGGTGATCTACCCTCGGGTGGTGGATAACAC-GCGCCTGAGGATGAGCCTGCGGCGCATCAGCTTGTTGGTAGGGTAATGGCCTACCAAGGCAAAGACGCGTAGCTGGTCTGAGAGGATGAACAGCCACACTGGAACTGAGACACGGTCCAG	0.122125	0.236128	0.683076	0.717853	0.96857	0.77343	0.596245	0.832968	0	0.0554734	0	0.0754907	0.0452591	0.110274	0.103718	0.0789889	0.0472144	0.061792	0.146092	0	0.256039	0.164617	0.179131	0.133004	0.0673968	0.105433	0.130455	0.0727185	0.0841131	0.160772	0.121135	0.247744	Bacteria	Proteobacteria	Deltaproteobacteria	Myxococcales	Polyangiaceae	un_Polyangiaceae
55	ATTGAACGCTAGCGGGATGCTTTACACATGCAAGTCGAACGGCAGCGCGAAGAAAGCTTGCTTTCTTTGGCGGCGAGTGGCGAACGGGTGAGTAATATATCGGAACGTGCCCAGTAGCGG-TCACTATTGGAGCGGCCGATATCAGATTAGCTTGTTGGTGAGGTAAAGGCTCACCAAGGCCGCGATCTGTAGCTGGTTTGAGAGGACGACCAGCCACACTGGGACTGAGACACGGCCCAG	0.844698	0.691516	0.400424	0.390137	0.320718	0.283086	0.193377	0.166594	0.453333	0.406805	0.384756	0.276799	0.181036	0.18379	0.239349	0.315956	0.377715	0.267765	0.243487	0.233463	0.244907	0.232401	0.347067	0.228007	0.185341	0.203838	0.166034	0.169676	0.241825	0.097861	0.115367	0.21825	Bacteria	Proteobacteria	Betaproteobacteria	Burkholderiales	Alcaligenaceae	Pusillimonas
56	GATGAACGCTAGCGGCAGGCCTAATACATGCAAGTCGAACGGTAAGTATTTTAGCAATAAGATACGAGAGTGACGTACGGGTGAGTAACACGTATGCAACCTACCCAAAACAGGAGGATA-GTGGTTTTGGATGGGCATGCGTATGATTAGCTAGTTGGTAGTGTAACGGACTACCAAGGCGATGATCATTAGGGGACCTGAGAGGGTGATCCCCCACACTGGCACTGAGATACGGGCCAG	0.0203542	0.0168663	0.129549	0.031211	0.173188	0.0808816	0.161147	0.201666	0.0711111	0.0369822	0.0366435	0.0754907	0.0452591	0.128653	0.119674	0.203114	0.25181	0.123584	0.073046	0.140078	0.333964	0.348601	0.39185	0.21534	0.261163	0.231953	0.628558	0.557508	0.73599	0.636097	0.473004	0.566271	Bacteria	Bacteroidetes	Bacteroidetes_i.s.	Bacteroidetes_i.s.	Bacteroidetes_i.s.	Ohtaekwangia
57	GATGAACGCTAGCGGCAGGCCTAACACATGCAAGTCGAGGGGCATCGGGGTGCTTGCACCGCCGGCGACCGGCGCACGGGTGAGCAACGCGTACAGAACCTGCCCGTTACAGGGGGACAG-TCGGTAACGGATGGCTGTGCGTCCCATTAGCTAGTTGGCAGGGTAACGGCCTACCAAGGCGTCGATGGGTAGGGGCCCTGAGAGGGGGATCCCCCACACTGGTACTGAGACACGGACCAG	0.529208	0.421656	0.388647	0.319913	0.224503	0.166818	0.217549	0.271811	1.16444	0.795118	0.879443	1.00654	0.9957	1.02922	0.925483	0.722185	0.865596	0.679712	1.09569	0.793774	0.723589	0.455118	0.660546	0.639686	0.547599	0.667744	0.391366	0.593867	0.55725	0.559206	0.415321	0.548575	Bacteria	Bacteroidetes	Flavobacteria	Flavobacteriales	Flavobacteriaceae	Arenibacter
58	GACGAACGCTGGCGGCGTGCTTAACACATGCAAGTCGAACGGTGAACTCGAGAGCTTGCTCTTGGGGGATCAGTGGCGAACGGGTGAGTAACACGTGAGTAACCTGCCCCAGACTCTGGA-TCGGTCTGGGATGGACTCGCGGCCTATCAGCTTGTTGGTGAGGTAACGGCTCACCAAGGCGACGACGGGTAGCCGGCCTGAGAGGGCGACCGGCCACACTGGGACTGAGACACGGCCCAG	0.559739	0.657784	0.211989	0.491573	0.160359	0.535841	0.15309	0.403332	0.142222	0.0739645	0.293148	0.150981	0.226296	0.128653	0.079783	0.259535	0.0944287	0.144181	0.146092	0.280156	0.100189	0.232401	0.0335871	0.221673	0.227464	0.288184	0.118596	0.157557	0	0.202712	0.248039	0.259541	Bacteria	Actinobacteria	Actinobacteria	Actinomycetales	Intrasporangiaceae	Tetrasphaera
59	GACGAACGCTGGCGGCGTGCTTAACACATGCAAGTCGAACGGAAAGGCCCCTTCGGGGGTGCTCGAGTGGCGAACGGGTGAGTAACACGTGGGTGATCTGCCCTGCACTTTGGGATAAGC-GCGGTGTGGGATGAGCCCGCGGCCTATCAGCTTGTTGGTGGGGTGATGGCCTACCAAGGCGACGACGGGTAGCCGGCCTGAGAGGGTGACCGGCCACACTGGGACTGAGATACGGCCCAG	0.284958	0.202395	0.247321	0.257491	0.224503	0.2477	0.161147	0.36826	0.266667	0.203402	0.366435	0.327126	0.294184	0.238927	0.319132	0.259535	0.220334	0.267765	0.267835	0.357977	0.222643	0.290501	0.145544	0.272342	0.176917	0.407676	0.260911	0.399952	0.157712	0.384454	0.490309	0.407008	Bacteria	Actinobacteria	Actinobacteria	Actinomycetales	Mycobacteriaceae	Mycobacterium
60	ATTGAACGCTGGCGGCGTGCCTAACACATGCAAGTCGAGCGGTAACAGGTGTAGCAATACATGCTGACGAGCGGCGGACGGGTGAGTAACGCTTGGGAATCTGCCTATTAGTGGGGGATA-GCGCTAACAGATGAGCCCAAGTCGGATTAGCTAGTTGGTAGGGTAATGGCCTACCAAGGCGACGATCCGTAACTGGTCTGAGAGGACGACCAGTCACACCGGAACTGAGACACGGTCCGG	0.0407083	0.0337325	0.0117772	0.522784	0.0384862	1.76423	0.0241721	0.289347	0.0266667	0.0184911	0.0183217	0.0251636	0	0	0.0079783	0.0112841	0	0.102987	0.121743	0.108949	0.0111321	0.00968335	0.0335871	0.418013	0.404381	0.428762	0.0355787	0.0242395	0	0.209702	0.299954	0.300832	Bacteria	Proteobacteria	Gammaproteobacteria	Xanthomonadales	Sinobacteraceae	Steroidobacter
61	AACGAACGCTGGCGGCGCGTTTTAAGCATGCAAGTCGAACGGTAACAGGCCTTCGGGCGCTGACGAGTGGCGAACGGGTGAGTAACACGTAGGTGATCTGCCCATAGGTTGGGGATATAC-TCGCCTGTGGATGAGCCTGCGGCTGATTAGCTAGTTGGTGGGGTAAGAGCCTACCAAGGCGACGATCAGTAGCCGGCCTGAGAGGGTGATCGGCCACACTGGGACTGAGATACGGCCCAG	0.0305312	0	0.129549	0.031211	0.538807	0.181984	1.82097	0.683911	0	0.0184911	0	0	0	0	0.0718047	0.0112841	0.0314762	0.0205973	0.0243487	0.0155642	0.122454	0.106517	0.134348	0.0950029	0.0336984	0.0843467	0.415085	0.375712	0.462622	0.272613	0.213429	0.241845	Bacteria	Spirochaetes	Spirochaetes	Spirochaetales	Spirochaetaceae	Spirochaeta
62	ATTGAACGCTGGCGGCGTGCTTAACACATGCAAGTCGAGCGGTAACGCGGGGGCAACCCTGGCGACGAGCGGCGAACGGGTGAGTAATGCTTCGGAATCTTCCTAGTGGTGGGGAATAAC-GCGCCATTGGATGAGCCGAAGTCGGATTAGCTAGTTGGTGGGGTAATGGCCTACCAAGGCGACGATCCGTAGCTGGTCTGAGAGGACGACCAGCCACACTGGGACTGAGACACGGCCCAG	0.254427	0.421656	0.471087	0.335518	0.904426	0.551006	0.539844	0.429636	0.106667	0.147929	0.10993	0.276799	0.135777	0.18379	0.231371	0.13541	0.173119	0.164779	0.146092	0.171206	0.3117	0.232401	0.279893	0.177339	0.151643	0.140578	0.189753	0.193916	0.357481	0.251643	0.184587	0.259541	Bacteria	Proteobacteria	un_Proteobacteria	un_Proteobacteria	un_Proteobacteria	un_Proteobacteria
63	ATTGAACGCTGGCGGCATGCTTTACACATGCAAGTCGAACGGCAGCGCGGGCTTCGGCCTGGCGGCGAGTGGCGAACGGGTGAGTAATACATCGGAACGTACCCAGTAGTGGGGGATAGC-GCGCTATTGGAGCGGCCGATGTCGGATTAGCTTGTTGGTGGGGTAAAGGCCTACCAAGGCGACGATCCGTAGCTGGTCTGAGAGGACGACCAGCCACACTGGGACTGAGACACGGCCCAG	0.895583	0.826446	0.435756	0.390137	0.282232	0.283086	0.15309	0.22797	0.195556	0.240385	0.513008	0.377453	0.271555	0.238927	0.167544	0.112841	0.188857	0.144181	0.146092	0.108949	0.333964	0.242084	0.179131	0.190006	0.21904	0.161664	0.106736	0.133317	0.12617	0.181742	0.109599	0.0589866	Bacteria	Proteobacteria	Betaproteobacteria	Burkholderiales	un_Burkholderiales	un_Burkholderiales
64	AACGAACGTTAGCGGCGCGCCTAACACATGCAAGTCGTGCGAGAAAGGGCTTCGGCCCCAGTAAAGCGGCGCACGGGTGAGTAACACGTAGGTCATCTGCCCTCGAGTGGTGGATAACCC-GCGCTTGAGGATGAGCCTGCGGCCCATCAGCTAGTTGGTAGGGTAACGGCTTACCAAGGCAAAGACGGGTAGCTGGTCTGAGAGGATGAACAGCCACACTGGAACTGAGACACGGTCCAG	0.0101771	0	0.16488	0.0702247	0.327133	0.242645	0.749335	0.885577	0.0177778	0	0	0	0	0	0.0398915	0.0225683	0.0786906	0.0411946	0.0486973	0.0155642	0.222643	0.232401	0.111957	0.101336	0.0673968	0.119491	0.391366	0.642346	0.420566	0.349504	0.409552	0.365717	Bacteria	Proteobacteria	Deltaproteobacteria	Myxococcales	un_Myxococcales	un_Myxococcales
65	GACGAACGCTGGCGGCGTGCTTAACACATGCAAGTCGAACGGAAAGGCCCTTTCGGGGGTGCTCGAGTGGCGAACGGGTGAGTAACACGTGGGTGATCTGCCCTGCACTTTGGGATAAGC-GCGGTGTGGGATGGGCCCGCGGCCTATCAGCTTGTTGGTGGGGTGATGGCCTACCAAGGCGACGACGGGTAGCCGGCCTGAGAGGGTGTCCGGCCACACTGGGACTGAGATACGGCCCAG	0.0814166	0.0337325	0.0588859	0.296504	0.0256575	0.202204	0.0161147	0.482245	0.0355556	0.0554734	0.0549652	0.0754907	0.113148	0.0918949	0.0558481	0.0677048	0.0314762	0.123584	0.121743	0.264591	0.0111321	0.0581001	0.0335871	0.392678	0.429655	0.597456	0.0592979	0.0605987	0.0105141	0.678037	0.842178	0.725535	Bacteria	Actinobacteria	Actinobacteria	Actinomycetales	Mycobacteriaceae	Mycobacterium
66	GATGAACGCTAGCGGCAGGCTTAATACATGCAAGTCGAACGGTAAGTTGAGTAGCAATACTTGACCTAGAGTGACGTACGGGTGCGTAACACGTATGCAACCTACCCATAACAGGAGGAT-GTGGTTATGGATGGGCATGCGTCTGATTAGTTAGTTGGCGGTGTAACGGACCACCAAGACGATGATCAGTAGGGGAACTGAGAGGTTGATCCCCCACACTGGCACTGAGATACGGGCCAG	0.0305312	0.067465	0.105995	0.109238	0.237332	0.0960469	0.370639	0.350723	0.00888889	0.0739645	0.0366435	0	0.0905182	0.0367579	0.111696	0.0338524	0.173119	0.0823893	0.121743	0.077821	0.322832	0.213034	0.246305	0.190006	0.117944	0.12652	0.29649	0.44843	0.578278	0.433385	0.386479	0.300832	Bacteria	Bacteroidetes	Bacteroidetes_i.s.	Bacteroidetes_i.s.	Bacteroidetes_i.s.	Ohtaekwangia
67	AACGAACGCTGGCGGCAGGCTTAACACATGCAAGTCGAGCGCCCCGCAAGGGGAGCGGCAGACGGGTGAGTAACGCGTGGGAACGTACCCTTTTCTACGGAATAACCCAGGGAAACTTGG-TCGGGAAAGGAACGGCCCGCGTTGGATTAGCTAGTTGGTGGGGTAACGGCCTACCAAGGCGACGATCCATAGCTGGTCTGAGAGGATGATCAGCCACATTGGGACTGAGACACGGCCCAA	0.31549	0.371058	0.223766	0.343321	0.141116	0.217369	0.15309	0.245506	0.32	0.221893	0.274826	0.176145	0.384702	0.202169	0.247327	0.180546	0.110167	0.329557	0.243487	0.264591	0.133586	0.164617	0.15674	0.171005	0.160067	0.274127	0.189753	0.193916	0.105141	0.118831	0.161514	0.153365	Bacteria	Proteobacteria	Alphaproteobacteria	Rhizobiales	Rhizobiaceae	Rhizobium
68	AATCAACGCTGGCGGCGTGCCTCAGACATGCAAGTCGAACGCGAAAGCCTCCTTCGGGGGGCAAGTAGAGTGGCGCACGGGTGAGTAACACGTAGGTAATCTACCTTTGGATTGGGAATA-GCGTCTGAAGAGGAGCCTGCGGCAGATTAGCTAGTTGGTAAGGTAACGGCTTACCAAGGCGATGATCTGTAGCCGGCCTGAGAGGGCGGTCGGCCACACTGACACTGACATACGGGTCAG	0.396906	0.26986	0.447533	0.48377	0.41052	0.343747	0.668762	0.36826	0.435556	0.33284	0.256504	0.427781	0.248925	0.330822	0.359023	0.248251	0.50362	0.350154	0.316533	0.233463	0.333964	0.309867	0.39185	0.23434	0.412805	0.224924	0.249051	0.230275	0.283882	0.216692	0.265344	0.17696	Bacteria	Acidobacteria	Acidobacteria_Gp4	Acidobacteria_Gp4	Acidobacteria_Gp4	Gp4
69	GACGAACGCTGGCGGCGTGCTTAACACATGCAAGTCAAGGGGGCCCAGCAATGGGCAACCGGCGAACGGGTGCGTAACACGTGAGCAAGCTACCGATTTGTGGGGGATAGCCGGCCCAAC-GGGCAAATCGATGCGCTCGCGGCCTATCAGCTAGTTGGCGAGGTAATGGCTCACCAAGGCTACGACGGGTAGCTGGTCTGAGAGGATGGCCAGCCACATTGGGACTGCGACACGGCCCAG	0	0	0.0706631	0.0546192	0.14753	0.0808816	0.410926	0.271811	0	0	0.0183217	0	0	0.018379	0.143609	0.13541	0.0944287	0.144181	0.0243487	0.077821	0.267171	0.14525	0.324675	0.259674	0.21904	0.168693	0.592979	0.812023	0.725476	0.342514	0.426857	0.418805	Bacteria	Gemmatimonadetes	Gemmatimonadetes	Gemmatimonadales	Gemmatimonadaceae	Gemmatimonas
70	GATGAACGCTAGCGGCAGGCCTAACACATGCAAGTCGAGGGGCAGCGGGAAGGAGCTTGCTCCTTTGCCGGCGACCGGCGCACGGGTGCGCAGCGCGTATGGAACCTGCCCTTTACAGGG-GCGGTAAAGGATGGCCATGCGTCCCATTAGCTAGTTGGTGCGGTAACGGCGCACCAAGGCCGCGATGGGTAGGGGCCCTGAGAGGGGGATCCCCCACACTGGTACTGAGACACGGACCAG	0.142479	0.354191	0.223766	0.234082	0.0898012	0.111212	0.177262	0.263043	0.16	0.129438	0.0732869	0.226472	0.248925	0.238927	0.27924	0.236967	0.173119	0.30896	0.413927	0.18677	0.278303	0.271134	0.257501	0.266008	0.278012	0.281156	0.28463	0.121197	0.199769	0.314553	0.24227	0.259541	Bacteria	Bacteroidetes	Flavobacteria	Flavobacteriales	Flavobacteriaceae	Arenibacter
71	AACGAACGCTGGCGGCGTGCCTAAGACATGCAAGTCGTGCGAGAAAGGGGCTTCGGCCCTGAGTACAGCGGCATCCGGGTGAGTAACGCGTGGGTAACCTACCTCGAAGTCTGGGATAAC-CCGCTACGAGATGGGCCCGCGTCCCATTAGCTAGTTGGCGAGGTAACGGCTCACCAAGGCTACGATGGGTAGCTGGTCTGAGAGGACGATCAGCCACACTGGGACTGAGACACGGCCCAG	0.17301	0.219261	0.105995	0.093633	0.0898012	0.0909918	0.0805737	0.105217	0.32	0.369822	0.567974	0.578762	0.271555	0.312443	0.175523	0.248251	0.220334	0.329557	0.219138	0.373541	0.300568	0.213034	0.257501	0.23434	0.168492	0.393618	0.27277	0.254515	0.30491	0.307563	0.224965	0.21825	Bacteria	Proteobacteria	Deltaproteobacteria	un_Deltaproteobacteria	un_Deltaproteobacteria	un_Deltaproteobacteria
72	GACGAACGCTGGCGGCGTGCTTAACACATGCAAGTCGAGGGCACCCTTTCGGGGGTGACCGGCGAACGGGTGCGTAACACGTGAGCAACCTGCCCGCTTGTGGGGGATAGCCGGCCCAAC-GCGCAGGCGGAGGGGCTCGCGGCCTATCAGCTAGTTGGTGCGGTAACGGCGCACCAAGGCATCGACGGGTAGCTGGTCTGAGAGGATGGCCAGCCACATTGGGACTTAGACACGGCCCAG	0.0305312	0.0168663	0.0117772	0.0390137	0.0384862	0.0303306	0.0161147	0.0350723	0.293333	0.295858	0.348113	0.301963	0.362073	0.312443	0.27924	0.32724	0.236072	0.288363	0.243487	0.373541	0.356228	0.309867	0.201523	0.354677	0.261163	0.295213	0.249051	0.218155	0.262854	0.188732	0.17305	0.165163	Bacteria	Gemmatimonadetes	Gemmatimonadetes	Gemmatimonadales	Gemmatimonadaceae	Gemmatimonas
73	GACGAACGCTGGCGGCGTGCCTAACACATGCAAGTCGAACGGGGTCCATGGGAGCTTGCTCCCGGAAGACCTAGTGGCGAACGGGTGAGTAACACGTGAGGAACCTGCCTCGGAGTGGGG-TCGCTCTGAGAGGGCCTCGCGGCCTATCAGCTAGTTGGTGGGGTAACGGCCTACCAAGGCAACGACGGGTAGCTGGTTTGAGAGAACGATCAGCCACACTGGGACTGAGACACGGCCCAG	0.162833	0.202395	0.270875	0.366729	0.269403	0.288141	0.161147	0.420868	0.133333	0.16642	0.329791	0.226472	0.271555	0.147032	0.151588	0.101557	0.110167	0.164779	0.194789	0.0622568	0.144718	0.154934	0.0223914	0.12667	0.0758214	0.224924	0.166034	0.193916	0.0420566	0.237663	0.248039	0.253642	Bacteria	Actinobacteria	Actinobacteria	Acidimicrobiales	un_Acidimicrobiales	un_Acidimicrobiales
74	GATGAACGCTAGCGGCAGGCTTAATACATGCAAGTCGTGGGGCAGCAGCTCTGTAGCAATACAGAGGCTGGCGACCGGCAAACGGGTGCGGAACACGTACGCAACCTACCCAAAACTGGG-GCGGTTTTGGATGGGCGTGCGCCTGATTAGGTAGTTGGTAGGGTAACGGCCTACCAAGCCTTCGATCAGTAACTGGTGTGAGAGCACGACCAGTCACACGGGCACTGAGACACGGGCCCG	0.0407083	0.0337325	0.211989	0.117041	0.173188	0.121322	0.322295	0.113985	0.0711111	0.0554734	0.0183217	0.0251636	0.0452591	0.0367579	0.215414	0.248251	0.25181	0.205973	0.121743	0.171206	0.289436	0.242084	0.279893	0.278675	0.193766	0.147607	0.343928	0.242395	0.378509	0.216692	0.271112	0.253642	Bacteria	Bacteroidetes	Sphingobacteria	Sphingobacteriales	Chitinophagaceae	Flavisolibacter
75	AACGAACGCTGGCGGCGTGCCTAACACATGCAAGTCGAACGAGAAAGGGGCTTCGGCCCTGAGTAAAGTGGCGCACGGGTGAGTAACACGTAGGTAACCTGCCTCCAAGATTGGGACAAC-TCACTTAGAGATGGGCCTGCGTACCATTAGCTAGTTGGTAGGGTAACGGCCTACCAAGGCAAAGATGGTTAGCTGGTCTGAGAGGATGATCAGCCACACTGGAACTGAGACACGGTCCAG	0.0305312	0.0168663	0.282652	0.319913	0.468249	0.51562	0.596245	0.552389	0.0266667	0.0184911	0.0183217	0	0	0	0.119674	0.112841	0.0786906	0.0205973	0.0486973	0.0933852	0.0667928	0.1162	0.111957	0.133004	0.126369	0.105433	0.237192	0.290874	0.220797	0.167762	0.305722	0.21825	Bacteria	Proteobacteria	Deltaproteobacteria	un_Deltaproteobacteria	un_Deltaproteobacteria	un_Deltaproteobacteria
76	ATTGAACGCTGGCGGCATGCCTAACACATGCAAGTCGAACGGCAGCGCGGAGAAGCTTCGGCTTCTCTGGCGGCGAGTGGCGGACGGGTGAGTAATGCATGGGAATCTGCCCTTTGGTGG-GCGCCGAAGGATGAGCCCATGTCCGATTAGCTAGTTGGTGGGGTAATGGCCTACCAAGGCGACGATCGGTAGCTGGTCTGAGAGGACGATCAGCCACACTGGGACTGAGACACGGCCCAG	0.193365	0.252994	0.153103	0.093633	0.128287	0.0707714	0.0644589	0.0789128	0.471111	0.351331	0.311469	0.201309	0.339443	0.459474	0.223392	0.338524	0.314762	0.226571	0.170441	0.0622568	0.189246	0.280817	0.179131	0.202673	0.210615	0.196809	0.189753	0.0727185	0.147198	0.160772	0.196124	0.21825	Bacteria	Proteobacteria	Gammaproteobacteria	Chromatiales	Ectothiorhodospiraceae	un_Ectothiorhodospiraceae
77	GATGAACGCTGGCGGCGTGCTTAACACATGCAAGTCGAACGTGAAGGACCGACTTCGGTTGGTCTGGAAAGTGGCGAACGGGTGAGTAACACGTAGGTAACCTGCCTGGCAGCGGGGGAT-GCGCTGCGAGAGGGGCCTGCGGTCGATTAGCTTGTTGGTGGGGTAACGGCCTACCAAGGCGATGATCGATAGCTGGTCTGAGAGGATGACCAGCCACACGGGAACTGAGACACGGTCCCG	0.498677	0.556586	0.317984	0.39794	0.256575	0.530786	0.314237	0.631302	0.142222	0.0924556	0.128252	0.201309	0.203666	0.128653	0.207436	0.0564207	0.0786906	0.164779	0.073046	0.0155642	0.0556607	0.14525	0.0671742	0.10767	0.126369	0.147607	0.118596	0.121197	0	0.167762	0.213429	0.212352	Bacteria	Chloroflexi	Caldilineae	Caldilineales	Caldilineaceae	Caldilinea
78	ATTGAACGCTGGCGGCAGGCCTAACACATGCAAGTCGAGCGCGAAAGTTCTTCGGAATAAGTAGAGCGGCGGACGGGTGAGTAACGCGTGGGAATCTGCCCAGTAGTGGGGGATAACGTT-TCGCTATTGGATGAGCCTGCGTCGGATTAGCTTGTTGGTGGGGTAATGGCCTACCAAGGCGACGATCCGTAACTGGTCTGAGAGGATGATCAGTCACACTGGAACTGAGACACGGTCCAG	0.885406	1.02884	0.200212	0.390137	0.288647	0.389243	0.0886311	0.113985	0.453333	0.295858	0.403078	0.452944	0.362073	0.477853	0.103718	0.0789889	0.141643	0.185376	0.194789	0.0466926	0.0556607	0.0581001	0.0895656	0.12667	0.117944	0.119491	0.0830171	0.0363592	0.073599	0.0419404	0.0346101	0.0707839	Bacteria	Proteobacteria	Gammaproteobacteria	Pseudomonadales	Pseudomonadaceae	Cellvibrio
79	AACGAACGCTGGCGGCAGGCCTAACACATGCAAGTCGAGCGCGTCCCTTCGGGGGCGAGCGGCGCACGGGTGAGTAACGCGTGGGAACCTACCCTGGGGTAGGGGATAACCGCTGGAAAC-TCGCCCTGGGATGGGCCCGCGTCGGATTAGCTAGTTGGTGGGGTAACGGCTCACCAAGGCGACGATCCGTAGCTGGTCTGAGAGGATGATCAGCCACACTGGGACTGAGACACGGCCCAG	0.356198	0.371058	0.306207	0.234082	0.14753	0.131433	0.161147	0.298115	0.435556	0.258876	0.476365	0.452944	0.384702	0.477853	0.151588	0.225683	0.0629525	0.123584	0.121743	0.0933852	0.0667928	0.125884	0.0447828	0.12667	0.0926706	0.105433	0.142315	0.048479	0.0946273	0.174752	0.126904	0.188757	Bacteria	Proteobacteria	Alphaproteobacteria	un_Alphaproteobacteria	un_Alphaproteobacteria	un_Alphaproteobacteria
80	GATGAACGCTAGCGGCAGGCTTAATACATGCAAGTCGTGGGGCAGCGCAGTGTAGCAATACATGGGCGGCGACCGGCAAACGGGTGCGCAATACGTACGCAACCTCCCTTTAAGCGGGGA-GCACTTAAAGATGGGCGTACGGCTGATTAGGTAGTTGGCGGGGTAACGGCCCACCAAGCCTGCGATCAGTAGCTGATGTGAGAGCATGATCAGCCACACGGGCACTGAGACACGGGCCCG	0.162833	0.0843313	0.306207	0.288702	0.243746	0.262865	0.257836	0.18413	0.0622222	0.0184911	0.0732869	0.0754907	0.0226296	0.128653	0.207436	0.169262	0.25181	0.0411946	0.170441	0.0933852	0.211511	0.213034	0.223914	0.228007	0.278012	0.260069	0.249051	0.145437	0.231311	0.181742	0.115367	0.300832	Bacteria	Bacteroidetes	Sphingobacteria	Sphingobacteriales	Chitinophagaceae	Terrimonas
81	GATGAACGCTAGCGGCAGGCTTAACACATGCAAGTCGAGGGGTAACAGGGGTGCTTGCACTCGCTGACGACCGGCGCACGGGTGCGTAACGCGTATGCAATCTACCTTTTACAGGGGGAT-TCGGTAAAAGATGAGCATGCGTTCTATTAGCTAGATGGTAAGGTAACGGCTTACCATGGCAACGATAGATAGGGGCCCTGAGAGGGGGATCCCCCACACTGGTACTGAGACACGGACCAG	0.234073	0.168663	0.294429	0.327715	0.179602	0.338692	0.0966884	0.192898	0.0711111	0.147929	0.0916086	0.0754907	0.113148	0.18379	0.255306	0.214399	0.3305	0.144181	0.219138	0.171206	0.0890571	0.14525	0.201523	0.158338	0.269587	0.182751	0.0948767	0.0363592	0.105141	0.0838809	0.13844	0.123872	Bacteria	Bacteroidetes	Flavobacteria	Flavobacteriales	Flavobacteriaceae	Formosa
82	GACGAACGCTGGCGGCGGGCCTAACACATGCAAGTCGTACGCGAACGGGTCCTTCGGGACCCTAGTAGAGTGGCGAACGGGTGCGTAACACGTAGGTAACCTGCCCTGGAGTGGGGGATA-GCGCTCGAGGATGGGCCTGCGTCGGATTAGCTAGTTGGTGAGGTAACGGCTCACCAAGGCAACGATCCGTAGCTGGTCTGAGAGGATGATCAGCCACACTGGCACTGAGACACGGGCCAG	0.162833	0.151796	0.0942174	0.132647	0.0769724	0.0707714	0.0564016	0.0964489	0.488889	0.388314	0.659582	0.427781	0.316814	0.312443	0.27924	0.225683	0.377715	0.164779	0.0973947	0.217899	0.178114	0.1162	0.190327	0.152005	0.176917	0.182751	0.166034	0.0969579	0.105141	0.202712	0.132672	0.17696	Bacteria	Bacteroidetes	Sphingobacteria	Sphingobacteriales	Rhodothermaceae	Salisaeta
83	GATGAACGCTGGCGGCGTGCCTAACACATGCAAGTCGAACGTGAAGCGAGCTGTCTTTGATGGCTTGTGGAAAGTGGCGAACGGGTGAGTAAGGCGTAGGTGACCTGCCTGGCAGTGGGG-GCGCTGCGAGAGGGGCCTGCGTCCGATTAGCTAGTTGGTGGGGTAAGGGCCTACCAAGGCAATGATCGGTAGCTGGTCTGAGAGGATGATCAGCCACACGGGAACTGAGACACGGTCCCG	0.0508854	0.0505988	0.153103	0.117041	0.0577293	0.116267	0.145033	0.298115	0.257778	0.203402	0.256504	0.201309	0.181036	0.330822	0.151588	0.259535	0.188857	0.164779	0.170441	0.202335	0.077925	0.154934	0.0111957	0.152005	0.185341	0.147607	0.154175	0.169676	0.0105141	0.258633	0.317259	0.336224	Bacteria	Chloroflexi	Caldilineae	Caldilineales	Caldilineaceae	Caldilinea
84	AATCAACGCTGGCGGCGTGCCTCAGACATGCAAGTCGAACGCGAAAGTCCCCTTCGGGGGACAAGTAGAGTGGCGCACGGGTGAGTAACACGTAGGTAATCTACCTTCGGATGGGGAATA-GCGTCTGAAGAGGAGCCTGCGGCGGATTAGCTAGTTGGTAAGGTAATGGCTTACCAAGGCTACGATCCGTAACCGGCCTGAGAGGGCGGTCGGTCACACTGACACTGACATACGGGTCAG	0.0814166	0.0505988	0.117772	0.0858302	0.14753	0.0454959	0.0483442	0.149057	0.417778	0.314349	0.311469	0.150981	0.271555	0.220548	0.303175	0.349808	0.361977	0.164779	0.194789	0.155642	0.233775	0.300184	0.23511	0.259674	0.244313	0.231953	0.249051	0.218155	0.252339	0.202712	0.317259	0.188757	Bacteria	Acidobacteria	Acidobacteria_Gp4	Acidobacteria_Gp4	Acidobacteria_Gp4	Gp4
85	ATTGAACGCTGGCGGCATGCTTAACACATGCAAGTCGAACGGCAGCGGGCCCTTCGGGGTGCCGGCGAGTGGCGGACGGGTGAGTAATGCATGGGAATCTGCCCTTCGGTGGGGGACAAC-GCGCCGATGGATGAGCCCATGTCCGATTAGCTAGTTGGTGGGGTAAAGGCCTACCAAGGCGACGATCGGTAGCTGGTCTGAGAGGATGATCAGCCACACTGGGACTGAGACACGGCCCAG	0.132302	0.185529	0.0353315	0.0780275	0.0256575	0.0303306	0.0805737	0.0964489	0.382222	0.425296	0.366435	0.402617	0.316814	0.367579	0.135631	0.248251	0.236072	0.144181	0.194789	0.202335	0.166982	0.251767	0.15674	0.209006	0.286436	0.302242	0.142315	0.121197	0.210283	0.167762	0.178819	0.206453	Bacteria	Proteobacteria	un_Proteobacteria	un_Proteobacteria	un_Proteobacteria	un_Proteobacteria
86	GACGAACGCTGGCGGCGTGCTTAACACATGCAAGTCGAGCGGTAAGGCCCCTTCGGGGGTACACGAGCGGCGAACGGGTGAGTAACACGTGAGTAACCTGCCCCTGACTCTGGGATAAGC-CCGGTCAGGGATGGGCTCGCGGCCTATCAGCTTGTTGGTGGGGTAACGGCCTACCAAGGCGATGACGGGTAGCCGGCCTGAGAGGGCGACCGGCCACACTGGGACTGAGACACGGCCCAG	0.183187	0.13493	0.211989	0.179463	0.0705581	0.0657163	0.0725163	0.166594	0.248889	0.33284	0.53133	0.226472	0.248925	0.238927	0.263284	0.203114	0.0786906	0.0411946	0.146092	0.124514	0.0890571	0.222717	0.100761	0.120337	0.0336984	0.161664	0.0948767	0.278754	0.0315424	0.195722	0.340332	0.253642	Bacteria	Actinobacteria	Actinobacteria	Actinomycetales	Nocardiopsaceae	Thermobifida
87	AACGAACGTTAGCGGCGCGCTTAACACATGCAAGTCGAACGAGAAAGGGCTCTTCGGAGCCCCGGTAAAGTGGCGCACGGGTGAGTAACACGTAGGTAACCTACCCTTCGGTGGGGGATA-ACGCCGAGGGATGGGCCTGCGGCCCATCAGGTAGTTGGTAGGGTAATGGCCTACCAAGCCTAAGACGGGTAGCTGGTCTGAGAGGATGATCAGCCACACTGGAACTGAGACACGGTCCAG	0.0305312	0	0.247321	0.17166	0.532393	0.338692	0.620417	0.59623	0	0	0	0	0	0	0.0398915	0.0112841	0.0157381	0.0411946	0.0243487	0	0.077925	0.135567	0.0783699	0.0380011	0.0505476	0.0281156	0.28463	0.254515	0.336453	0.265623	0.224965	0.159264	Bacteria	Proteobacteria	Deltaproteobacteria	Myxococcales	un_Myxococcales	un_Myxococcales
88	ATTGAACGCTGGCGGCATGCTTTACACATGCAAGTCGAACGGTAACGCGGGGGCAACCCTGGCGACGAGTGGCGAACGGGTGAGTAATACATCGGAACGTACCCGGTAGTGGGGGATAGC-GCGCTATCGGAGCGGCCGATGGCAGATTAGCTTGTTGGTGAGGTAAAGGCTCACCAAGGCTACGATCTGTAGCTGGTCTGAGAGGACGACCAGCCACACTGGGACTGAGACACGGCCCAG	0.763281	0.624051	0.54175	0.858302	0.436177	0.682439	0.418983	0.973257	0.0444444	0.0554734	0.0916086	0.0754907	0	0.0367579	0.143609	0.0902731	0.0944287	0.061792	0.0973947	0.124514	0.144718	0.106517	0.0895656	0.0760023	0.117944	0.140578	0.166034	0.121197	0.189255	0.111841	0.20766	0.21825	Bacteria	Proteobacteria	Betaproteobacteria	Burkholderiales	un_Burkholderiales	un_Burkholderiales
89	AACGAACGCTGGCGGCAGGCTTAACACATGCAAGTCGAACGCCCCGCAAGGGGAGTGGCAGACGGGTGAGTAACGCGTGGGAACGTACCTTTCGCTTCGGAATATCCCCGGGAAACTGGG-TCGGCGAAAGATCGGCCCGCGTTAGATTAGCTAGTTGGCGGTGTAATGGACCACCAAGGCTACGATCTATAGCTGGTCTGAGAGGATGATCAGCCACACTGGGACTGAGACACGGCCCAG	0.111948	0.0843313	0.16488	0.0468165	0.179602	0.0808816	0.338409	0.271811	0.0622222	0.0184911	0.0549652	0.150981	0.0678887	0.0551369	0.199457	0.236967	0.173119	0.0205973	0.073046	0.077821	0.211511	0.213034	0.167936	0.196339	0.168492	0.147607	0.201613	0.242395	0.30491	0.272613	0.190355	0.200554	Bacteria	Proteobacteria	Alphaproteobacteria	un_Alphaproteobacteria	un_Alphaproteobacteria	un_Alphaproteobacteria
90	GACGAACGCTGGCGGCGTGCTTAACACATGCAAGTCGAGCGGAAAGGCCCTTCGGGGTACTCGAGCGGCGAACGGGTGAGTAACACGTGAGTAACCTGCCCCTGACTCTGGGATAAGCCC-TCGGTTGGGGATGGACTCGCGGCCTATCAGCTTGTTGGTGGGGTAATGGCCTACCAAGGCGACGACGGGTAGCCGGCCTGAGAGGGCGACCGGCCACACTGGGACTGAGACACGGCCCAG	0.366375	0.354191	0.247321	0.0780275	0.109044	0.0859367	0.15309	0.219202	0.115556	0.0739645	0.0549652	0.0754907	0.0452591	0.147032	0.199457	0.270819	0.125905	0.185376	0.121743	0.108949	0.222643	0.300184	0.167936	0.164672	0.126369	0.196809	0.260911	0.145437	0.147198	0.300573	0.288417	0.224149	Bacteria	Actinobacteria	Actinobacteria	Actinomycetales	Streptosporangiaceae	Streptosporangium
91	AACGAACGCTGGCGGCATGCCTAACACATGCAAGTCGAACGAGACCTTCGGGTCTAGTGGCGCACGGGTGCGTAACGCGTGGGAATCTGCCCTCTGGTACGGAATAACTCAGGGAAACTT-TCGCCTGAGGATGAGCCCGCGTAGGATTAGCTTGTTGGTGAGGTAAAAGCTCACCAAGGCGACGATCCTTAGCTGGTCTGAGAGGATGATCAGCCACACTGGGACTGAGACACGGCCCAG	0.162833	0.219261	0.447533	0.374532	0.545221	0.384188	0.314237	0.289347	0.382222	0.33284	0.274826	0.176145	0.271555	0.312443	0.478698	0.32724	0.299024	0.329557	0.413927	0.373541	0.46755	0.271134	0.436632	0.240674	0.261163	0.295213	0.213472	0.290874	0.315424	0.209702	0.299954	0.300832	Bacteria	Proteobacteria	Alphaproteobacteria	Sphingomonadales	Sphingomonadaceae	un_Sphingomonadaceae
92	GATGAACGCTAGCGGCAGGCCTAACACATGCAAGTCGTACGGTAACAGGGAAAAGCTTGCTTTTCCGCTGACGAGTGGCGCACGGGTGCGCAACGCGTATAGAACCTACCCTGTACAGGG-GCGGTACGGGATGGCTATGCGTCCCATTAGTTAGTAGGTGAGGTAACGGCTCACCTAGGCAATGATGGGTAGGGGCCCTGAGAGGGGGATCCCCCACACTGGTACTGAGACACGGACCAG	0	0	0.0235544	0.00780275	0.0705581	0.0252755	0.370639	0.131521	0.00888889	0	0	0	0	0	0.0478698	0.0225683	0.0472144	0	0	0.0155642	0.0667928	0.0774668	0.123153	0.0443347	0.0673968	0.0351444	0.687856	0.812023	0.820103	0.524256	0.271112	0.318528	Bacteria	Bacteroidetes	Flavobacteria	Flavobacteriales	Flavobacteriaceae	un_Flavobacteriaceae
93	GATGAACGCTGGCGGCGTGCTTAACACATGCAAGTCGAACGATGAAGCCGGGAGCTTGCTCCTGGTGGATTAGTGGCGAACGGGTGAGTAACACGTGAGTAACCTGCCCCAGACTCTGGG-TCGGTCTGGGATGGACTCGCGGCCTATCAGGTAGTTGGTGAGGTAACGGCTCACCAAGCCGACGACGGGTAGCCGGCCTGAGAGGGTGACCGGCCACACTGGGACTGAGACACGGCCCAG	0.478323	0.438523	0.306207	0.265293	0.20526	0.384188	0.136975	0.210434	0.266667	0.184911	0.329791	0.377453	0.362073	0.275685	0.143609	0.203114	0.0944287	0.185376	0.194789	0.124514	0.133586	0.154934	0.0783699	0.12667	0.117944	0.210867	0.0592979	0.121197	0.0315424	0.167762	0.144209	0.194656	Bacteria	Actinobacteria	Actinobacteria	Actinomycetales	Microbacteriaceae	Salinibacterium
94	ATTGAACGCTGGCGGCAGGCCTAACACATGCAAGTCGAGCGGTAACAGGGGAGCTTGCTCCCGCTGACGAGCGGCGGACGGGTGAGTAACGCGCAGGAATCTACCTGGTAGTGGGGGATA-ACGCTATCAGAAGAGCCTGCGTAGGATTAGCTTGTTGGTAGGGTAAAGGCCTACCAAGGCGACGATCCTTAACTGGTCTGAGAGGATGATCAGTCACACCGGAACTGAGACACGGTCCGG	0.0305312	0.0337325	0.176658	0.062422	0.282232	0.242645	0.451213	0.271811	0.0177778	0	0	0.0251636	0.0226296	0.0367579	0.223392	0.0677048	0.125905	0.0823893	0.0243487	0.077821	0.256039	0.106517	0.212718	0.190006	0.0926706	0.154636	0.426945	0.266634	0.483651	0.349504	0.340332	0.283136	Bacteria	Proteobacteria	Gammaproteobacteria	un_Gammaproteobacteria	un_Gammaproteobacteria	un_Gammaproteobacteria
95	GATGAACGCTAGCGGCAGGCCTAACACATGCAAGTCGAGGGGTAACGGGGTGCTTGCACCGCCGACGACCGGCGCACGGGTGAGCAACGCGTACAGAACCTGCCCGTTACAGGGGGACAG-TCGGTAACGGATGGCTGTGCGTCCCATTAGCTAGTTGGGGGGGTAACGGCCCACCAAGGCGTCGATGGGTAGGGGCCCTGAGAGGGGGATCCCCCACACTGGTACTGAGACACGGACCAG	0.162833	0.185529	0.176658	0.234082	0.0898012	0.0758265	0.0805737	0.140289	0.257778	0.240385	0.274826	0.327126	0.248925	0.349201	0.239349	0.236967	0.220334	0.226571	0.292184	0.326848	0.144718	0.213034	0.23511	0.316676	0.126369	0.210867	0.118596	0.133317	0.105141	0.132811	0.17305	0.182858	Bacteria	Bacteroidetes	Flavobacteria	Flavobacteriales	Flavobacteriaceae	Arenibacter
96	AACGAACGCTGGCGGCATGCCTAACACATGCAAGTCGAACGAGACCTTCGGGTCTAGTGGCGCACGGGTGCGTAACGCGTGGGAACCTGCCCTTAGGTTCGGAATAACACAGAGAAATTT-TCGCCTTTGGATGGGCCCGCGTTGGATTAGCTAGTTGGTGGGGTAAAGGCCTACCAAGGCGACGATCCATAGCTGGTCTGAGAGGATGATCAGCCACACTGGGACTGAGACACGGCCCAG	0.111948	0.219261	0.117772	0.062422	0.166774	0.116267	0.15309	0.113985	0.08	0.147929	0.0732869	0.0754907	0.0678887	0.0735159	0.167544	0.13541	0.110167	0.226571	0.219138	0.155642	0.300568	0.213034	0.223914	0.152005	0.151643	0.168693	0.225332	0.181796	0.210283	0.195722	0.161514	0.241845	Bacteria	Proteobacteria	Alphaproteobacteria	Sphingomonadales	Erythrobacteraceae	Porphyrobacter
97	ATTGAACGCTGGCGGCGTGCCTAACACATGCAAGTCGAACGGTAACAGGCTGAGAGAGCCTTCGGGTGATCTCGGTGCTGACGAGTGGCGAACGGGTGAGTAATGCTTGGGAATCTGCCT-GCGCTAACAGATGAGCCCAAGTCGGATTAGCTAGTTGGTAGGGTAACGGCCTACCAAGGCGACGATCCGTAGCTGGTCTGAGAGGACGACCAGCCACACTGGGACTGAGACACGGCCCAG	0.234073	0.168663	0.235544	0.234082	0.269403	0.283086	0.0966884	0.0789128	0.186667	0.110947	0.274826	0.201309	0.158407	0.202169	0.143609	0.157978	0.141643	0.102987	0.170441	0.0466926	0.077925	0.0968335	0.15674	0.133004	0.0926706	0.12652	0.177894	0.109078	0.12617	0.111841	0.132672	0.141568	Bacteria	Proteobacteria	Gammaproteobacteria	Xanthomonadales	Sinobacteraceae	Steroidobacter
98	AGTGAACGCTGGCGGCAGGCCTAACACATGCAAGTCGAGCGGCAGCGCGGGGGCAACCCTGGCGGCGAGCGGCGGACGGGTGAGGAATGCATCGGAATCTACCTCGTTGTGGGGGATAAC-ACGCGATGAGATGAGCCGATGCCGGATTAGCTAGTTGGCGGGGTAAAGGCCCACCAAGGCGACGATCCGTAGCTGGTCTGAGAGGATGATCAGCCACACTGGAACTGAGACACGGTCCAG	0	0.0337325	0.0235544	0.031211	0.0320718	0.0303306	0.0966884	0.113985	0	0	0	0	0.0226296	0.0551369	0.119674	0.0677048	0.141643	0.267765	0.073046	0.0622568	0.278303	0.154934	0.123153	0.10767	0.160067	0.168693	0.391366	0.290874	0.588792	0.510275	0.357637	0.342122	Bacteria	Proteobacteria	Gammaproteobacteria	Xanthomonadales	Xanthomonadaceae	Dokdonella
99	AGCGAACGCTGGCGGCAGGCCTAACACATGCAAGTCGAGCGGCCGTAGCAATACGGCAGCGGCAGACGGGAGAGTAACACGTGGGAACGCGCCCTTCGGTCCGGGATAACCCAGGGAAAC-TTGCCGAAGGAACGGCCCGCGTCCGATTAGCTAGTTGGTGAGGTAACGGCTCACCAAGGCGACGATCGGTAGCTGGTCTGAGAGGATGACCAGCCTCACTGGGACTGAGACACGGCCCAG	0.0203542	0.0337325	0.0588859	0.031211	0.121873	0.0404408	0.0966884	0.105217	0.462222	0.388314	0.366435	0.402617	0.429962	0.459474	0.414872	0.51907	0.361977	0.350154	0.316533	0.404669	0.545475	0.513218	0.570981	0.34201	0.488627	0.281156	0.5574	0.46055	0.620334	0.608136	0.542224	0.595765	Bacteria	Proteobacteria	Alphaproteobacteria	Rhizobiales	un_Rhizobiales	un_Rhizobiales
100	ATTGAACGCTGGCGGCATGCTTAACACATGCAAGTCGAACGGTAACAGGTCGAGTGATCCCTTCGGGGTGATCTTGGCGCTGACGAGTGGCGCACGGGTGAGTAATACATGGGAATCTGC-GTGCTATTAGATGAGCCCATGTCGGATTAGCTTGTTGGTGGGGTAATGGCCTACCAAGGCGACGATCCGTAGCTGGTCTGAGAGGACGATCAGCCACACTGGGACTGAGACACGGCCCAG	0.132302	0.0505988	0.259098	0.265293	0.25016	0.409463	0.394811	0.271811	0.0177778	0.0554734	0.0366435	0.0503271	0.0226296	0.0735159	0.103718	0.0902731	0.110167	0.0411946	0.0486973	0.0622568	0.111321	0.0968335	0.167936	0.0696688	0.126369	0.168693	0.166034	0.0727185	0.115656	0.188732	0.126904	0.153365	Bacteria	Proteobacteria	Gammaproteobacteria	un_Gammaproteobacteria	un_Gammaproteobacteria	un_Gammaproteobacteria
101	GATGAACGCTGGCGGCGTGCTTAACACATGCAAGTCGAACGGTGAACGAGGGAGCTTGCTCCCTCCGGATCAGTGGCGAACGGGTGAGTAACACGTGAGTAACCTGCCCTTGACTCTGGG-TCGGTCAAGGATGGACTCGCGGCCTATCAGCTTGTTGGTGAGGTAACGGCTCACCAAGGCGACGACGGGTAGCCGGCCTGAGAGGGTGACCGGCCACACTGGGACTGAGACACGGCCCAG	0.24425	0.252994	0.211989	0.280899	0.179602	0.26792	0.0564016	0.149057	0.133333	0.0924556	0.128252	0.226472	0.158407	0.0735159	0.175523	0.13541	0.141643	0.226571	0.146092	0.171206	0.077925	0.14525	0.0895656	0.183672	0.160067	0.18978	0.142315	0.0727185	0.073599	0.111841	0.155745	0.165163	Bacteria	Actinobacteria	Actinobacteria	Actinomycetales	Microbacteriaceae	Leifsonia
102	AGTGAACGCTGGCGGCAGGCCTAACACATGCAAGTCGAACGGCAGCGCGAGAGAGCTTGCTCTCTTGGCGGCGAGTGGCGGACGGGTGAGGAATGCGTCGGAATCTGCCTTTTCGTGGGG-GCGCGGAAAGATGAGCCGACGCCGGATTAGCTAGTTGGCGGGGTAACGGCCCACCAAGGCGACGATCCGTAGCTGGTCTGAGAGGATGATCAGCCACACTGGGACTGAGACACGGCCCAG	0.0508854	0.0843313	0.0588859	0.148252	0.14753	0.202204	0.0644589	0.157826	0.0888889	0.0739645	0.10993	0.0503271	0.0678887	0.147032	0.223392	0.225683	0.141643	0.247168	0.340881	0.171206	0.233775	0.14525	0.167936	0.259674	0.21904	0.274127	0.0830171	0.157557	0.157712	0.160772	0.201892	0.171061	Bacteria	Proteobacteria	Gammaproteobacteria	Xanthomonadales	Xanthomonadaceae	Lysobacter
103	GATGAACGCTAGCGGCAGGCCTAACACATGCAAGTCGAACGGTAAGTTGGGAGCTTGCTCCCAGCACGAGTGGCGCACGGGTGAGTAACGCGTATGCAATCTGCCTCCAACTGGAGAATA-GCGGTTGGAGATGAGCATGCGTCCCATTAGTTAGTTGGCGAGGTAACGGCTCACCAAGACATCGATGGGTAGGGGGCCTGAGAGGGTTATCCCCCACACTGGTACTGAGACACGGACCAG	0.17301	0.168663	0.0588859	0.0546192	0.0384862	0.0050551	0.0402868	0.0613766	0.231111	0.184911	0.293148	0.125818	0.339443	0.330822	0.303175	0.349808	0.173119	0.102987	0.146092	0.155642	0.233775	0.154934	0.179131	0.164672	0.117944	0.12652	0.225332	0.218155	0.157712	0.195722	0.167282	0.153365	Bacteria	Bacteroidetes	Flavobacteria	Flavobacteriales	Cryomorphaceae	Owenweeksia
104	ATTGAACGCTGGCGGCAGGCCTAACACATGCAAGTCGAGCGGATGAAGGTAGCTTGCTACCGGATTCAGCGGCGGACGGGTGAGTAATGCCTAGGAATCTGCCCGATAGTGGGGGATAAC-GCGCTATCGGATGAGCCTAGGTCGGATTAGCTAGTTGGTGAGGTAATGGCTCACCAAGGCGACGATCCGTAGCTGGTCTGAGAGGATGATCAGCCACACTGGGACTGAGACACGGCCCAG	0.264604	0.286726	0.259098	0.234082	0.186017	0.192094	0.0966884	0.0876808	0.364444	0.314349	0.384756	0.150981	0.158407	0.202169	0.127653	0.169262	0.204596	0.123584	0.0973947	0.0933852	0.122454	0.135567	0.145544	0.0760023	0.134794	0.217896	0.0948767	0.109078	0.136684	0.153782	0.10383	0.0707839	Bacteria	Proteobacteria	Gammaproteobacteria	Pseudomonadales	Pseudomonadaceae	un_Pseudomonadaceae
105	ATTGAACGCTGGCGGCATGCTTTACACATGCAAGTCGAACGGTAACAGGTCTTCGGATGCTGACGAGTGGCGAACGGGTGAGTAATGCATCGGAACGTGCCCAGTCGTGGGGGATAACGC-GCGCGATTGGAGCGGCCGATGTCAGATTAGGTAGTTGGTGGGGTAAAGGCTCACCAAGCCAACGATCTGTAGCTGGTCTGAGAGGACGACCAGCCACACTGGGACTGAGACACGGCCCAG	0.519031	0.455389	0.329761	0.273096	0.186017	0.394298	0.0725163	0.166594	0.177778	0.16642	0.10993	0.226472	0.0678887	0.110274	0.0957396	0.0902731	0.283286	0.123584	0.073046	0.155642	0.100189	0.0871502	0.0335871	0.114003	0.151643	0.119491	0.0237192	0.0121197	0.0420566	0.090871	0.0576834	0.0707839	Bacteria	Proteobacteria	Betaproteobacteria	Burkholderiales	Comamonadaceae	Hydrogenophaga
106	ATTGAACGCTGGCGGCAGGCCTAACACATGCAAGTCGAGCGGTAACAGGGGAGCTTGCTCCCGCTGACGAGCGGCGGACGGGTGAGTAACGCACAGGAATCTACCCAGTAGCGGGGGATA-GCACTATTGGAAGAGCCTGTGTTGGATTAGCTAGTTGGTGGGGTAAAGGCCTACCAAGGCGACGATCCATAGCTGGTCTGAGAGGATGATCAGCCACACCGGAACTGAGACACGGTCCGG	0.0712396	0.0843313	0.270875	0.117041	0.14753	0.207259	0.136975	0.0876808	0.0977778	0.0369822	0.128252	0.150981	0.0226296	0.0551369	0.215414	0.0789889	0.0944287	0.061792	0.170441	0.077821	0.144718	0.1162	0.201523	0.158338	0.10952	0.147607	0.332068	0.218155	0.262854	0.181742	0.17305	0.17696	Bacteria	Proteobacteria	Gammaproteobacteria	un_Gammaproteobacteria	un_Gammaproteobacteria	un_Gammaproteobacteria
107	ATTGAACGCTGGCGGCATGCTTTACACATGCAAGTCGAGCGGCAGCGCGGGGGCAACCCTGGCGGCGAGCGGCGAACGGGTGAGTAATGCATCGGAACGTGTCCCGTAATGGGGGATAAC-ACGTTAGGGGAGCGGCCGATGTCCGATTAGCTAGTTGGTGGGGTAATGGCTTACCAAGGCGACGATCGGTAGCTGGTCTGAGAGGATGATCAGCCACACTGGGACTGAGACACGGCCCAG	0.0305312	0.067465	0.0942174	0.101436	0.0577293	0.0454959	0.120861	0.131521	0.133333	0.240385	0.219861	0.201309	0.158407	0.0735159	0.167544	0.214399	0.236072	0.102987	0.194789	0.140078	0.244907	0.222717	0.134348	0.259674	0.235889	0.133549	0.260911	0.193916	0.452108	0.167762	0.155745	0.153365	Bacteria	Proteobacteria	Betaproteobacteria	un_Betaproteobacteria	un_Betaproteobacteria	un_Betaproteobacteria
108	GATGAACGCTAGCGGGAGGCTTAACACATGCAAGTCGAGCGGCAGCACGGACTTCGGTCTGGTGGCGAGCGGCGCACGGGTGCGTAACGCGTATGCAACCTGCCTTATACAGGGGGATAG-ATGGTATAAGATGGGCATGCGTCTGATTAGCTAGTTGGTGAGGTAACGGCTCACCAAGGCGACGATCAGTAGGGGTTCTGAGAGGATTATCCCCCACACTGGTACTGAGACACGGACCAG	0.193365	0.303593	0.141326	0.249688	0.115459	0.2477	0.0966884	0.219202	0.16	0.0924556	0.0366435	0.150981	0.0226296	0.220548	0.0957396	0.124125	0.125905	0.123584	0.170441	0.0466926	0.100189	0.14525	0.0783699	0.101336	0.143218	0.140578	0.0830171	0.0363592	0.105141	0.125821	0.109599	0.129771	Bacteria	Bacteroidetes	un_Bacteroidetes	un_Bacteroidetes	un_Bacteroidetes	un_Bacteroidetes
109	AACGAACGTTAGCGGCGCGCCTAATACATGCAAGTCGAGCGAGAAAGGGCTTCGGCCCCGGTAAAGCGGCGCACGGGTGAGTAACACGTAGGCAATCTGCCCTCGAGTGGTGGATAACCC-GCGCTTGAGGATGAGCCTGCGGCCCATCAGCTAGTTGGCGGGGTAAAGGCCCACCAAGGCAAAGACGGGTAGCTGGTCTGAGAGGATGAACAGCCACACTGGAACTGAGACACGGTCCAG	0.0305312	0	0.176658	0.0546192	0.545221	0.338692	1.50673	1.6221	0	0	0	0	0	0	0	0	0.0157381	0	0	0	0.0445286	0.0193667	0.0671742	0.0190006	0	0.0140578	0.0711575	0.0727185	0.0946273	0.0768908	0.0634518	0.0294933	Bacteria	Proteobacteria	Deltaproteobacteria	Myxococcales	Phaselicystidaceae	Phaselicystis
110	AGCGAACGCTGGCGGCAGGCTTAACACATGCAAGTCGAGCGGGCGTAGCAATACGTCAGCGGCAGACGGGTGAGTAACGCGTGGGAACGTACCTTTTGGTTCGGAACAACACAGGGAAAC-TCGCCGAAAGATCGGCCCGCGTCTGATTAGCTAGTTGGTGAGGTAACGGCTCACCAAGGCGACGATCAGTAGCTGGTCTGAGAGGATGATCAGCCACATTGGGACTGAGACACGGCCCAA	0.468146	0.624051	0.577082	0.639825	0.538807	0.601557	0.676819	0.780359	0.382222	0.351331	0.164896	0.377453	0.384702	0.275685	0.215414	0.225683	0.236072	0.30896	0.316533	0.280156	0.289436	0.242084	0.145544	0.21534	0.193766	0.161664	0.28463	0.206036	0.189255	0.209702	0.236502	0.330325	Bacteria	Proteobacteria	Alphaproteobacteria	Rhizobiales	Bradyrhizobiaceae	Bradyrhizobium
111	ATTGAACGCTAGCGGGATGCTTTACACATGCAAGTCGAACGGCAGCGCGGACTTCGGTCTGGCGGCGAGTGGCGAACGGGTGAGTAATATATCGGAACGTGCCCAGTAGCGGGGGATAAC-TCACTATTGGAGCGGCCGATATCAGATTAGCTAGTTGGTGGGGTAAAGGCCCACCAAGGCGACGATCTGTAGCTGGTTTGAGAGGACGACCAGCCACACTGGGACTGAGACACGGCCCAG	0.396906	0.421656	0.54175	0.390137	0.41052	0.414518	0.30618	0.447172	0.231111	0.240385	0.164896	0.100654	0.0452591	0.128653	0.311154	0.32724	0.173119	0.164779	0.340881	0.18677	0.200378	0.154934	0.167936	0.177339	0.252738	0.196809	0.0711575	0.133317	0.136684	0.188732	0.17305	0.129771	Bacteria	Proteobacteria	Betaproteobacteria	Burkholderiales	Alcaligenaceae	un_Alcaligenaceae
112	GATGAACGCTAGCGGCAGGCCTAACACATGCAAGTCGAGGGGTAGTGGTTGCTTGCAACCATGAGACCGGCGCACGGGTGCGTAACGCGTATGCAACCTACCTTGTACAGGGGGATAGCC-GCGGTACAAGATGGGCATGCGTCCTATTAGCTAGTAGGTATGGTAACGGCATACCTAGGCAACGATAGGTAGGGGCCCTGAGAGGGGGATCCCCCACACTGGTACTGAGACACGGACCAG	0.0712396	0.101198	0.0824402	0.0780275	0.20526	0.131433	0.169205	0.18413	0.115556	0.129438	0.0732869	0.176145	0.0678887	0.128653	0.207436	0.0789889	0.110167	0.0823893	0.170441	0.0933852	0.200378	0.154934	0.111957	0.158338	0.151643	0.154636	0.130455	0.181796	0.12617	0.146792	0.167282	0.159264	Bacteria	Bacteroidetes	Flavobacteria	Flavobacteriales	Flavobacteriaceae	un_Flavobacteriaceae
113	GACGAACGCTGGCGGCGTGCCTAATACATGCAAGTCGAGCGAACCGATTAAAAGCTTGCTTTTATGAGGTTAGCGGCGGACGGGTGAGTAACACGTGGGCAACCTGCCCTATAGACTGGG-TCACTATAGGATGGGCCCGCGGCGCATTAGCTAGTTGGTGGGGTAACGGCCTACCAAGGCGACGATGCGTAGCCGACCTGAGAGGGTGATCGGCCACACTGGGACTGAGACACGGCCCAG	0.0915937	0.0505988	0.0471087	0.093633	0.0705581	0.0909918	0.0805737	0.131521	0.408889	0.406805	0.769513	0.176145	0.316814	0.294064	0.27924	0.338524	0.173119	0.0823893	0.36523	0.124514	0.0890571	0.300184	0.0783699	0.202673	0.134794	0.351444	0.27277	0.254515	0.0210283	0.433385	0.496078	0.460096	Bacteria	Firmicutes	Bacilli	Bacillales	Planococcaceae	Ureibacillus
114	GATGAACGCTGGCGGCGTGCCTAATACATGCAAGTCGAACGGGAGACCTCATTTCGATGGGGTTGAGAGTGGCGCACGGGTGAGGAACACATGGCTGACCTGCCCTTCAGAGGGGGATAA-GTGCTGAAGGAGGGGGCTGTGGCCCATCAGCTTGTTGGTAGGGTAACGGCCTACCAAGGCGACGACGGGTAGGGGGCCTGAGAGGGTGACCCCCCACACTGGGACTGAGACACGGCCCAG	0.0610625	0.118064	0.141326	0.156055	0.0833868	0.0909918	0.0805737	0.0964489	0.328889	0.314349	0.146574	0.226472	0.226296	0.128653	0.0957396	0.101557	0.157381	0.061792	0.146092	0.140078	0.0890571	0.106517	0.100761	0.0950029	0.151643	0.12652	0.130455	0.157557	0.0315424	0.160772	0.196124	0.117973	Bacteria	Chloroflexi	Anaerolineae	Anaerolineales	Anaerolineaceae	un_Anaerolineaceae
115	GATGAACGCTAGCGGCAGGCCTAACACATGCAAGTCGAACGGGATTTATCAGCTTGCTGATAATGAGAGTGGCGCACGGGTGAGTAACGCGTATGCAACCTACCTTTTACAGTGGGATAG-TGGGTAAGAGATGGGCATGCGTTCTATTAGTTAGTTGGAGTGGTAACGGCACCCCAAGACAGCGATAGATAGGGGCCCTGAGAGGGGGATCCCCCACACTGGTACTGAGACACGGACCAG	0.325667	0.26986	0.282652	0.304307	0.173188	0.278031	0.0805737	0.0964489	0.0711111	0.0739645	0.0549652	0.0503271	0.0226296	0.0735159	0.175523	0.124125	0.125905	0.102987	0.146092	0.140078	0.0890571	0.106517	0.100761	0.158338	0.176917	0.175722	0.0474383	0.0363592	0.0315424	0.0629107	0.0634518	0.100277	Bacteria	Bacteroidetes	Flavobacteria	Flavobacteriales	Flavobacteriaceae	Gelidibacter
116	AACGAACGCTGGCGGCATGCCTAACACATGCAAGTCGAACGAGACCTTCGGGTCTAGTGGCGCACGGGTGCGTAACGCGTGGGAATCTGCCCTTGGGTTCGGGATAACAGTTGGAAACGA-TCGCCCAGGGATGAGCCCGCGTAGGATTAGCTAGTTGGTGAGGTAAAGGCTCACCAAGGCGACGATCCTTAGCTGGTCTGAGAGGATGATCAGCCACACTGGGACTGAGACACGGCCCAG	0.0915937	0.202395	0.188435	0.187266	0.121873	0.212314	0.15309	0.140289	0.133333	0.351331	0.201539	0.150981	0.113148	0.128653	0.215414	0.248251	0.173119	0.226571	0.170441	0.155642	0.3117	0.213034	0.201523	0.145671	0.278012	0.105433	0.118596	0.218155	0.17874	0.167762	0.149977	0.165163	Bacteria	Proteobacteria	Alphaproteobacteria	Sphingomonadales	Sphingomonadaceae	Sphingomonas
117	ATTGAACGCTAGCGGGATGCTTTACACATGCAAGTCGAACGGCAGCGCGGAACTTCGGTTCTGGCGGCGAGTGGCGAACGGGTGAGTAATGTATCGGAACGTGCCTAGTAGCGGGGGATA-TCACTATTAGAGCGGCCGATATCAGATTAGCTAGTTGGTGGGGTAAAGGCCTACCAAGGCAGTGATCTGTAGCTGGTTTGAGAGGACGACCAGCCACACTGGGACTGAGACACGGCCCAG	0.325667	0.219261	0.270875	0.210674	0.173188	0.207259	0.0886311	0.192898	0.222222	0.184911	0.10993	0.0754907	0.135777	0.18379	0.0638264	0.101557	0.0472144	0.0411946	0.219138	0.18677	0.0556607	0.0581001	0.123153	0.0823358	0.126369	0.0913756	0.166034	0.0848382	0.073599	0.0629107	0.0403784	0.0884799	Bacteria	Proteobacteria	Betaproteobacteria	Burkholderiales	Alcaligenaceae	un_Alcaligenaceae
118	AACGAACGCTGGCGGCAGGCTTAACACATGCAAGTCGAGCGCCTCGCAAGAGGAGCGGCAGACGGGTGAGTAACGCGTGGGAATCTACCCATCTCTACGGAACAACTCCGGGAAACTGGA-TCGGAGATGGATGAGCCCGCGTTGGATTAGCTAGTTGGTGGGGTAATGGCCTACCAAGGCGACGATCCATAGCTGGTCTGAGAGGATGATCAGCCACATTGGGACTGAGACACGGCCCAA	0.0101771	0.13493	0.0942174	0.0702247	0.0705581	0.106157	0.128918	0.149057	0.106667	0.0924556	0.0732869	0.100654	0.158407	0.165411	0.183501	0.157978	0.125905	0.247168	0.170441	0.280156	0.278303	0.154934	0.167936	0.23434	0.176917	0.133549	0.142315	0.266634	0.147198	0.153782	0.20766	0.200554	Bacteria	Proteobacteria	Alphaproteobacteria	Rhizobiales	Phyllobacteriaceae	Mesorhizobium
119	GATGAACGCTAGCGGCAGGCTTAATACATGCAAGTCGTGGGGCAGCAGGGGTAGCAATACCCGCTGGCGACCGGCAAACGGGTGCGGAACACGTACGCAACCTTCCTTTAACTGGAGAAT-GCGGTTAAAGATGGGCGTGCGCCTGATTAGATAGTTGGCGGGGTAACGGCCCACCAAGTCTGCGATCAGTAACTGGTGTGAGAGCACGACCAGTCACACGGGCACTGAGACACGGGCCCG	0.0610625	0.0337325	0.0353315	0.062422	0.0513149	0.0050551	0.00805737	0.00876808	0.302222	0.314349	0.256504	0.226472	0.271555	0.165411	0.183501	0.259535	0.141643	0.061792	0.146092	0.171206	0.178114	0.14525	0.145544	0.272342	0.210615	0.161664	0.142315	0.145437	0.105141	0.0699007	0.201892	0.165163	Bacteria	Bacteroidetes	Sphingobacteria	Sphingobacteriales	Chitinophagaceae	un_Chitinophagaceae
120	GATAAACGCTGGCGGCGTGCCTAATGCATGCAAGTCGAACGGGAGCTCACATTCCCACCGTCTTCGGATGGTGGCGTGGGTGGACCGTGGCGGACGGGTGAGGAACGCGTGGCCAACCTG-GCGGATCAGGAGGGGGCTGCGCCCGATTAGCTAGCTGGTGGGGTAACGGCTCACCAGGGCGACGATCGGTAGCTGGTCTGAGAGGATGATCAGCCACACGGGGACTGAGACACGGCCCCG	0.0610625	0.101198	0.0471087	0.062422	0.0256575	0.0050551	0.0322295	0.0964489	0.195556	0.203402	0.164896	0.125818	0.181036	0.18379	0.0957396	0.157978	0.0629525	0.123584	0.170441	0.0933852	0.144718	0.135567	0.100761	0.164672	0.0673968	0.175722	0.0830171	0.145437	0.0946273	0.265623	0.248039	0.26544	Bacteria	Chloroflexi	Thermomicrobia	Sphaerobacterales	Sphaerobacteraceae	Sphaerobacter
121	ATTGAACGCTGGCGGCATGCCTTACACATGCAAGTCGAGCGGCAGCGCGGGGGCAACCCTGGCGGCGAGCGGCGAACGGGTGAGTAATGCATCGGAACGTGTCCTCTTGTGGGGGATAAC-GCGCGAGAGGAGCGGCCGATGCCGGATTAGCTAGTTGGCGGGGTAACGGCCCACCAAGGCGACGATCCGTAGCTGGTCTGAGAGGACGACCAGCCACACTGGGACTGAGACACGGCCCAG	0.0203542	0.0168663	0.129549	0.0858302	0.10263	0.202204	0.386754	0.18413	0.0711111	0.0184911	0.0549652	0	0.0678887	0.0367579	0.0957396	0.146694	0.125905	0.0411946	0.121743	0.0933852	0.15585	0.106517	0.111957	0.164672	0.117944	0.0984044	0.28463	0.230275	0.262854	0.272613	0.190355	0.247744	Bacteria	Proteobacteria	Betaproteobacteria	un_Betaproteobacteria	un_Betaproteobacteria	un_Betaproteobacteria
122	GACGAACGCTGGCGGCGCGCTTAACACATGCAAGTCGAACGCGGGGGCTTCGGCTCTCGAGTGGCGAACGGGTGCGTAACACGTGAGCAACCTGCCCTCGTGCGGGGGATAACCAGGGGA-GTGTGCGAGGAGGGGCTCGCGGCGTATCAGCTAGATGGTGGGGTAATGGCTCACCATGGCGATGACGCGTAGGGGGTCTGAGAGGATGGCCCCCCACATTGGGACTGAGATACGGCCCAG	0.0407083	0.0337325	0.235544	0.124844	0.192431	0.0556061	0.241721	0.201666	0.08	0.0369822	0.0183217	0.0503271	0.113148	0.0551369	0.0957396	0.214399	0.173119	0.102987	0.0243487	0.0311284	0.200378	0.106517	0.100761	0.133004	0.084246	0.119491	0.118596	0.0969579	0.0946273	0.146792	0.0922935	0.123872	Bacteria	Gemmatimonadetes	Gemmatimonadetes	Gemmatimonadales	Gemmatimonadaceae	Gemmatimonas
123	ATTGAACGCTGGCGGCATGCTTTACACATGCAAGTCGAGCGGCAGCGCGGGACTCAGGCAACTGAGCCCTGGCGGCGAGCGGCGGACGGGTGAGTAATGCATCGGAACGTGTCCCGTAGT-GTGCTAGGGGAGCGGCCGATGTCCGATTAGCTAGTTGGTGGGGTAATGGCTTACCAAGGCAACGATCGGTAGCTGGTCTGAGAGGATGATCAGCCACACTGGGACTGAGACACGGCCCAG	0.0712396	0	0.153103	0.101436	0.121873	0.0657163	0.145033	0.0613766	0.16	0.147929	0.219861	0.176145	0.135777	0.0918949	0.127653	0.146694	0.204596	0.164779	0.121743	0.217899	0.267171	0.232401	0.201523	0.133004	0.168492	0.133549	0.29649	0.230275	0.189255	0.202712	0.13844	0.212352	Bacteria	Proteobacteria	Betaproteobacteria	un_Betaproteobacteria	un_Betaproteobacteria	un_Betaproteobacteria
124	ATTGAACGCTGGCGGCGTGCCTAACACATGCAAGTCGAGCGGTAACGCGGGGGCAACCCTGGCGACGAGCGGCGAACGGGTGAGCAATATTTGGGAATCTGCCTATTAGTGGGGGATAAC-GCGCTAATAGATGAGCCCAAACCGGATTAGCTAGTTGGTAGGGTAATGGCCTACCAAGGCAACGATCCGTAGCTGGTCTGAGAGGACGACCAGCCACACTGGGACTGAGACACGGCCCAG	0.183187	0.303593	0.235544	0.17166	0.141116	0.136488	0.0886311	0.0789128	0.186667	0.129438	0.128252	0.301963	0.0452591	0.165411	0.0718047	0.101557	0.125905	0.0823893	0.0486973	0.108949	0.111321	0.0581001	0.100761	0.0760023	0.143218	0.0984044	0.0830171	0.121197	0.073599	0.118831	0.109599	0.0589866	Bacteria	Proteobacteria	Gammaproteobacteria	Xanthomonadales	Sinobacteraceae	Steroidobacter
125	GATGAACGCTAGCGGCAGGCCTAACACATGCAAGTCGAGGGGTAGTGGTTGCTTGCAACCATGAGACCGGCGCACGGGTGCGTAACGCGTATGCAACCTACCTTGTACAGGGGGATAGCC-GCGGTACGAGATGGGCATGCGTCCTATTAGCTAGTAGGTGTGGTAACGGCACACCTAGGCGACGATAGGTAGGGGCCCTGAGAGGGGGATCCCCCACACTGGTACTGAGACACGGACCAG	0.0610625	0.0505988	0.0824402	0.109238	0.141116	0.111212	0.0886311	0.166594	0.106667	0.0739645	0.0732869	0.125818	0.135777	0.0918949	0.111696	0.13541	0.0629525	0.205973	0.073046	0.108949	0.15585	0.125884	0.0783699	0.120337	0.176917	0.168693	0.201613	0.048479	0.168226	0.132811	0.0922935	0.141568	Bacteria	Bacteroidetes	Flavobacteria	Flavobacteriales	Flavobacteriaceae	un_Flavobacteriaceae
126	AACGAACGCTGGCGGCATGCCTAACACATGCAAGTCGAACGAGACCTTCGGGTCTAGTGGCGCACGGGTGCGTAACGCGTGGGAACCTGCCTTTAGGTTCGGAATAACTCCCCGAAAGGG-TCGCCTTTAGATGGGCCCGCGTTGGATTAGCTAGTTGGTGGGGTAAAGGCTCACCAAGGCGACGATCCATAGCTGGTCTTAGAGGATGATCAGCCACACTGGGACTGAGACACGGCCCAG	0.0508854	0.0337325	0.105995	0.0780275	0.0962155	0.0859367	0.104746	0.0964489	0.0977778	0.0554734	0.10993	0.0251636	0.0226296	0.110274	0.311154	0.146694	0.157381	0.123584	0.170441	0.311284	0.267171	0.232401	0.302284	0.32301	0.210615	0.154636	0.28463	0.254515	0.294396	0.265623	0.230734	0.277237	Bacteria	Proteobacteria	Alphaproteobacteria	Sphingomonadales	Erythrobacteraceae	un_Erythrobacteraceae
127	GATGAACGCTGGCGGCGTGCTTAACACATGCAAGTCAAGGGGGCCCAGCAATGGGCAACCGGCGAACGGGTGCGTAACACGTGAGCAACCTACCGAATTGTGGGGGATAGCCGGCCCAAC-GAGCAATTCGAGGGGCTCGCGGCCTATCAGCTAGTTGGTGAGGTAACGGCTCACCAAGGCGACGACGGGTAGCTGGTCTGAGAGGATGGCCAGCCACATTGGGACTGAGATACGGCCCAG	0.0101771	0.0168663	0.0706631	0.0546192	0.0449006	0.0454959	0.0402868	0.0613766	0.293333	0.221893	0.348113	0.176145	0.248925	0.128653	0.103718	0.248251	0.204596	0.247168	0.292184	0.280156	0.256039	0.164617	0.246305	0.221673	0.134794	0.119491	0.201613	0.169676	0.199769	0.139801	0.13844	0.153365	Bacteria	Gemmatimonadetes	Gemmatimonadetes	Gemmatimonadales	Gemmatimonadaceae	Gemmatimonas
128	GATGAACGCTAGCGGCAGGCCTAACACATGCAAGTCGAGGGGCATCGGGGACTTCGGTCCGCCGGCGACCGGCGCACGGGTGAGCAACGCGTACAGAACCTGCCCGTTACAGGGGGACAG-TCGGTAACGGATGGCTGTGCGTCCCATTAGCTAGTTGGGGGGGTAACGGCCCACCAAGGCGTCGATGGGTAGGGGCCCTGAGAGGGGGATCCCCCACACTGGTACTGAGACACGGACCAG	0.132302	0.118064	0.0942174	0.062422	0.0705581	0.0606612	0.0725163	0.105217	0.177778	0.221893	0.274826	0.100654	0.181036	0.220548	0.207436	0.101557	0.157381	0.123584	0.146092	0.18677	0.0890571	0.106517	0.134348	0.133004	0.176917	0.140578	0.106736	0.169676	0.0946273	0.0699007	0.10383	0.0707839	Bacteria	Bacteroidetes	Flavobacteria	Flavobacteriales	Flavobacteriaceae	Arenibacter
129	AACGAACGCTGGCGGCATGCTTAACACATGCAAGTCGAACGATCTCTTCGGAGATAGTGGCGGACGGGTGAGTAACGCGTGGGAACCTGCCCCGAGGTACGGAATAACTCATGGAAACGT-TCGCCTTGGGAGGGGCCCGCGTCGGATTAGGTAGTTGGTGGGGTAATGGCCTACCAAGCCTGCGATCCGTAGCTGGTCTGAGAGGATGATCAGCCACACTGGAACTTAGACACGGTCCAG	0.376552	0.556586	0.294429	0.218477	0.314304	0.353857	0.354524	0.263043	0.0711111	0.16642	0.10993	0.176145	0.158407	0.128653	0.0718047	0.0789889	0.110167	0.144181	0.121743	0.108949	0.0556607	0.0290501	0.0447828	0.0506682	0.0505476	0.0492022	0.0592979	0.0363592	0.0946273	0.118831	0.0576834	0.035392	Bacteria	Proteobacteria	Alphaproteobacteria	Rhodospirillales	Rhodospirillaceae	Oceanibaculum
130	GATGAACGCTAGCTGGAGGCCTAATACATGCAAGTCGAGCGGGATTCATGACTTCGGTTGTGATGAGAGCGGCGCACGGGTGAGTAACGCGTACACGACCTACCTCTGACAGGGGGATAG-GCGGTCAGAGATGGGTGTGCGTCTGATTAGCTAGTTGGTAGGGTAACGGCCTACCAAGGCGATGATCAGTAGGGGGCGTGAGAGCGTGATCCCCCACACGGGTACTGAGACACGGACCCG	0.0101771	0	0	0	0.0256575	0	0	0	0.311111	0.388314	0.384756	0.503271	0.271555	0.441095	0.151588	0.13541	0.141643	0.123584	0.073046	0.155642	0.189246	0.135567	0.123153	0.171005	0.0673968	0.0984044	0.130455	0.0727185	0.073599	0.111841	0.109599	0.0530879	Bacteria	Bacteroidetes	Sphingobacteria	Sphingobacteriales	Saprospiraceae	un_Saprospiraceae
131	AACGAACGCTGGCGGCAGGCTTAACACATGCAAGTCGAACGCCCCGCAAGGGGAGTGGCAGACGGGTGAGTAACGCGTGGGAATCTACCTAGTTCTACGGAACAACAGTTGGAAACGACT-TCGGAATTAGATGAGCCCGCGTGAGATTAGCTAGTTGGTGGGGTAATGGCCTACCAAGGCGACGATCTCTAGCTGGTCTGAGAGGATGATCAGCCACACTGGGACTGAGACACGGCCCAG	0.132302	0.236128	0.0353315	0.148252	0.0833868	0.136488	0.0564016	0.0701447	0.204444	0.277367	0.164896	0.276799	0.362073	0.202169	0.0558481	0.0902731	0.0786906	0.267765	0.292184	0.233463	0.0556607	0.0581001	0.0671742	0.0633352	0.151643	0.140578	0.0592979	0.0727185	0.0525707	0.0489305	0.0576834	0.106176	Bacteria	Proteobacteria	Alphaproteobacteria	Rhizobiales	Hyphomicrobiaceae	Devosia
132	AGTGAACGCTGGCGGCAGGCCTAACACATGCAAGTCGAACGGCAGCACAAGGGAGCTTGCTCCCTGGGTGGCGAGTGGCGGACGGGTGAGGAATACATCGGAATCTGCCCAGTCGTGGGG-GCGCGATTGGATGAGCCGATGTCGGATTAGCTAGTTGGAGGGGTAACGGCCCACCAAGGCGACGATCCGTAGCTGGTCTGAGAGGATGATCAGCCACACTGGGACTGAGACACGGCCCAG	0.17301	0.101198	0.388647	0.405743	0.35279	0.363967	0.128918	0.0526085	0.106667	0.0554734	0.10993	0.0754907	0.113148	0.0367579	0.215414	0.248251	0.141643	0.226571	0.146092	0.18677	0.267171	0.183984	0.23511	0.139338	0.168492	0.147607	0.0474383	0.181796	0.294396	0.111841	0.109599	0.0884799	Bacteria	Proteobacteria	Gammaproteobacteria	Xanthomonadales	Xanthomonadaceae	Luteimonas
133	GACGAACGCTGGCGGCGTGCTTAACACATGCAAGTCAAGGGGGCGGAGCAATCCGCAACCGGCGAACGGGTGCGTAACACGTGAGCGACCTACCTCATCGCGGGGGATAGCCGGCCCAAC-AGGCGGAGAGAGGGGCTCGCGGCCTATCAGCTAGTTGGCGGGGTAATGGCCCACCAAGGCGGTGACGGGTAGCTGGTCTGAGAGGATGGCCAGCCACATTGGGACTGAGAGACGGCCCAG	0.0305312	0	0.0588859	0.031211	0.0513149	0.0404408	0.0725163	0.122753	0.231111	0.147929	0.164896	0.0503271	0.0905182	0.018379	0.167544	0.19183	0.236072	0.123584	0.292184	0.29572	0.166982	0.242084	0.268697	0.266008	0.185341	0.0913756	0.213472	0.302994	0.252339	0.125821	0.20766	0.17696	Bacteria	Actinobacteria	Actinobacteria	Acidimicrobiales	Acidimicrobineae_i.s.	Aciditerrimonas
134	GATGAACGCTAGCGGCAGGCCTAACACATGCAAGTCGAGGGGCAGCGGGGATAAGCTTGCTTATCCGCCGGCGACCGGCGCACGGGTGCGCAACGCGTATAGAATCTGCCCTGTACCGGG-ACGGTACGGGATGACTATGCGTCCCATTAGTTAGTTGGCAGGGTAACGGCCTACCAAGACGTCGATGGGTAGGGGCCCTGAGAGGGGGATCCCCCACACTGGTACTGAGACACGGACCAG	0.0610625	0.0505988	0.200212	0.187266	0.166774	0.126378	0.169205	0.201666	0.106667	0.0924556	0.0366435	0.176145	0.0452591	0.0918949	0.0877613	0.112841	0.0314762	0.144181	0.219138	0.124514	0.077925	0.0774668	0.0783699	0.133004	0.101095	0.0913756	0.106736	0.121197	0.0630848	0.104851	0.121135	0.123872	Bacteria	Bacteroidetes	Flavobacteria	Flavobacteriales	Flavobacteriaceae	Arenibacter
135	GATGAACGCTAGCGGCAGGCCTAATACATGCAAGTCGAACGGTAACAGGGATAGCAATATCCGCTGACGAGTGGCGCACGGGTGCGTAACACGTATGAAACCTACCCATAACATGAGGAT-TCGGTTATGGAAGGTCATGCGCACGATTAGCTGGTTGGTGAGGTAACGGCTCACCAAGGCGACGATCGTTAGGGGACCTGAGAGGGTGATCCCCCACACTGGTACTGAGATACGGACCAG	0.0101771	0.0168663	0.153103	0.0468165	0.14753	0.0758265	0.0886311	0.113985	0	0	0	0.0251636	0	0	0.119674	0.0451365	0.125905	0.0205973	0	0.0311284	0.166982	0.309867	0.212718	0.120337	0.084246	0.0773178	0.320209	0.230275	0.157712	0.146792	0.126904	0.159264	Bacteria	Bacteroidetes	Sphingobacteria	Sphingobacteriales	Cytophagaceae	un_Cytophagaceae
136	GATGAACGCTGGCGGCGTGCCTAACACATGCAAGTCGAACGGTCCTTCGGGACAGTGGCGCACGGGTGAGTAACACGTAGCTAACCTGCCTTCGAGAGGGGGATAACGCCCCGAAAGGGG-CCGCTCGAAGAGGGGGCTGCGGCCCATCAGGTAGTTGGTAGGGTAATGGCCTACCAAGCCAACGACGGGTAGGGGGTCTGAGAGGATGGTCCCCCACACTGGGACTGAGACACGGCCCAG	0.305312	0.455389	0.235544	0.210674	0.10263	0.126378	0.0886311	0.271811	0.408889	0.443787	0.806156	0.578762	0.769405	0.422716	0.255306	0.406229	0.188857	0.144181	0.267835	0.171206	0.122454	0.154934	0.0783699	0.152005	0.168492	0.112462	0.237192	0.157557	0.0630848	0.209702	0.20766	0.271338	Bacteria	un_Bacteria	un_Bacteria	un_Bacteria	un_Bacteria	un_Bacteria
137	AGCGAACGCTGGCGGCAGGCCTAACACATGCAAGTCGAACGAACTCTTCGGAGTTAGTGGCGGACGGGTGAGTAACACGTGGGAACGTGCCTTTAGGTTCGGAATAACTCAGGGAAACTT-TCGCCTTTAGAGCGGCCCGCGTCTGATTAGCTTGTTGGTGGGGTAATGGCCCACCAAGGCTACGATCAGTAGCTGGTCTGAGAGGATGACCAGCCACATTGGGACTGAGACACGGCCCAA	0.508854	0.573453	0.176658	0.22628	0.109044	0.0859367	0.0725163	0.0350723	0.0711111	0.240385	0.219861	0.100654	0.0905182	0.202169	0.199457	0.146694	0.204596	0.247168	0.170441	0.404669	0.3117	0.154934	0.179131	0.120337	0.176917	0.168693	0.0948767	0.109078	0.073599	0.111841	0.109599	0.112075	Bacteria	Proteobacteria	Alphaproteobacteria	Caulobacterales	Caulobacteraceae	Brevundimonas
138	ATTGAACGCTAGCGGGATGCTTTACACATGCAAGTCGAACGGCAGCGCGGACTTCGGTCTGGCGGCGAGTGGCGAACGGGTGAGTAATATATCGGAACGTGCCCAGTAGCGGGGGATAAC-TCACTATTGGAGCGGCCGATATCAGATTAGCTAGTTGGTGAGGTAAAGGCTCACCAAGGCCGCGATCTGTAGCTGGTTTGAGAGGACGACCAGCCACACTGGGACTGAGACACGGCCCAG	0.234073	0.219261	0.188435	0.202871	0.121873	0.176929	0.104746	0.122753	0.0711111	0.16642	0.0916086	0.0754907	0.0905182	0.0367579	0.111696	0.124125	0.0944287	0.102987	0.0486973	0.0933852	0.189246	0.135567	0.0671742	0.158338	0.0926706	0.119491	0.0474383	0.0727185	0.0210283	0.097861	0.0865251	0.106176	Bacteria	Proteobacteria	Betaproteobacteria	Burkholderiales	Alcaligenaceae	Pusillimonas
139	AGTGAACGCTGGCGGTAGGCCTAACACATGCAAGTCGAACGGCAGCACAAGGGAGCTTGCTCCCTGGGTGGCGAGTGGCGGACGGGTGAGGAATACATCGGAATCTACCTTGTCGTGGGG-ACGCGATTAGATGAGCCGATGTCGGATTAGCTTGTTGGTGGGGTAAAAGCCCACCAAGGCGACGATCCGTAGCTGGTCTGAGAGGATGATCAGCCACACTGGAACTGAGACACGGTCCAG	0.122125	0.0337325	0.282652	0.335518	0.314304	0.379133	0.177262	0.166594	0.0177778	0.0554734	0.0366435	0.0251636	0.0226296	0.018379	0.0877613	0.157978	0.157381	0.0823893	0.121743	0.140078	0.111321	0.164617	0.134348	0.10767	0.126369	0.105433	0.118596	0.0848382	0.12617	0.0489305	0.0922935	0.0707839	Bacteria	Proteobacteria	Gammaproteobacteria	Xanthomonadales	Xanthomonadaceae	Luteimonas
140	AATCAACGCTGGCGGCGTGCCTAACACATGCAAGTCGAACGAGAAAGTGGAGCAATCCATGAGTACAGTGGCGAACGGGTGAGTAACACGTGACTAACCTGCCTTCGAGTGGGGGATAAC-ACGCTTGAAGAGGGGGTCGCGGCTGATTAGCTAGTTGGTGAGGTAATGGCTCACCAAGGCGAAGATCGGTAGCCGGCCTGAGAGGGCGCACGGCCACACTGGAACTGAAACACGGTCCAG	0.0508854	0.118064	0.0706631	0.0390137	0.0769724	0.0353857	0.0402868	0.0438404	0.204444	0.258876	0.10993	0.100654	0.113148	0.110274	0.0877613	0.169262	0.204596	0.102987	0.073046	0.155642	0.077925	0.0871502	0.167936	0.196339	0.126369	0.112462	0.0711575	0.0969579	0.12617	0.111841	0.115367	0.0884799	Bacteria	Acidobacteria	Acidobacteria_Gp1	Acidobacteria_Gp1	Acidobacteria_Gp1	Gp1
141	GACGAACGCTGGCGGCGTGCTTAACACATGCAAGTCGAACGAGGCCACCCTTTCGGGGGTGAGTCGAGTGGCGGACGGGTGAGTAACACGTGAGCGACCTATCCTGGTACGGGGGATAAC-TCGTGTCGGGAGGGGCTCGCGGGCTATCAGCTTGTTGGTGAGGTAACGGCTCACCAAGGCGACGACGGCTAGGGGGTCTGAGAGGACGACCCCCCACATTGGGACTGAGACACGGCCCAG	0.0101771	0	0.129549	0.156055	0.0962155	0.111212	0.112803	0.149057	0.106667	0.0739645	0.10993	0.0754907	0	0.0551369	0.079783	0.124125	0.110167	0.102987	0.121743	0.077821	0.122454	0.0484168	0.145544	0.139338	0.117944	0.112462	0.106736	0.0969579	0.115656	0.0838809	0.144209	0.153365	Bacteria	un_Bacteria	un_Bacteria	un_Bacteria	un_Bacteria	un_Bacteria
142	AACGAACGCTGGCGGCGCGCCTAATACATGCAAGTCGAACGAGAATGTGTAGCAATACACATGTACAGTGGCGAACGGGTGAGGAATACATGGGTAACCTACCCTCGAGTGGGGAATAAC-GCGCTCTTGGATGGGCTCATGCCCTATCAGCTTGTTGGTGAGGTAACGGCTCACCAAGGCTTCGACGGGTAGCTGATCTGAGAGGATGATCAGCCACACTGGCACTGCGACACGGGCCAG	0.0101771	0.0168663	0.0353315	0.0858302	0.0256575	0.050551	0.0805737	0.122753	0.231111	0.203402	0.164896	0.251636	0.135777	0.0735159	0.135631	0.124125	0.204596	0.164779	0.121743	0.155642	0.15585	0.154934	0.167936	0.202673	0.160067	0.18978	0.154175	0.0727185	0.157712	0.090871	0.149977	0.171061	Bacteria	Nitrospira	Nitrospira	Nitrospirales	Nitrospiraceae	Nitrospira
143	AATCAACGCTGGCGGCGTGCCTAATACATGCAAGTCGTACGCGAAGACCCCGCAAGGGGTTGGTAGCGTGGCAAACGGGTGAGTAACGCGTGGGCGACCTGCCTTCGAGTGGGGGATAAC-GCGCTTGAAGAGGGGCCTACGTCCGATTAGCTAGTTGGTGGGGTAACGGCCTACCAAGGCGACGATCGGTATCCGGCCTGAGAGGGCGGACGGACACACTGGGACTGAGACACGGCCCAG	0.0407083	0.0505988	0.0471087	0.062422	0.0641437	0.0808816	0.177262	0.113985	0.0355556	0	0	0	0.0226296	0	0.079783	0.0677048	0.110167	0.185376	0.073046	0.0933852	0.111321	0.164617	0.324675	0.145671	0.134794	0.12652	0.27277	0.278754	0.262854	0.230672	0.236502	0.165163	Bacteria	Acidobacteria	Acidobacteria_Gp6	Acidobacteria_Gp6	Acidobacteria_Gp6	Gp6
144	AGTGAACGCTGGCGGCAGGCCTAACACATGCAAGTCGAACGGCAGCACAGGAGAGCTTGCTCTCTGGGTGGCGAGTGGCGGACGGGTGAGGATAACGTCGGAATCTGCCTTTTTGTGGGG-GCGCAGAAAGATGAGCCGACGTCGGATTAGCTAGTTGGAGGGGTAAAGGCCCACCAAGGCGACGATCCGTAGCTGGTCTGAGAGGATGATCAGCCACACTGGGACTGAGACACGGCCCAG	0.0407083	0.13493	0.0588859	0.0858302	0.10263	0.141543	0.0322295	0.0263043	0.0355556	0.0554734	0.0732869	0.0754907	0.0678887	0.0735159	0.215414	0.19183	0.204596	0.144181	0.146092	0.108949	0.0890571	0.1743	0.111957	0.221673	0.244313	0.175722	0.0830171	0.0848382	0.115656	0.090871	0.0980618	0.117973	Bacteria	Proteobacteria	Gammaproteobacteria	Xanthomonadales	Xanthomonadaceae	Lysobacter
145	GATGAACGCTGGCGGCGTGCTTAACACATGCAAGTCGAACGAGGTCCATGGAGCTTGCTCCGGAAGACCTAGTGGCGAACGGGTGCGTAACACGTGAGAAACCTGCCCCGATCTCTGGGA-TCGGATTGGGAGGGTCTCGCGGCCTATCAGCTAGTTGGAGAGGTAACGGCTCACCAAGGCATCGACGGGTAGCTGGTCTGAGAGGATGATCAGCCACACTGGGACTGAGACACGGCCCAG	0.0508854	0.0505988	0.0117772	0.101436	0.109044	0.106157	0.0483442	0.122753	0.0888889	0.0184911	0.0549652	0.150981	0.0678887	0.110274	0.103718	0.112841	0.0786906	0.144181	0.073046	0.140078	0.133586	0.106517	0.190327	0.221673	0.134794	0.168693	0.0948767	0.121197	0.17874	0.174752	0.0980618	0.0884799	Bacteria	Actinobacteria	Actinobacteria	Acidimicrobiales	Acidimicrobiaceae	Ilumatobacter
146	AACGAACGCTGGCGGCATGCCTAACACATGCAAGTCGAACGAGACCTTCGGGTCTAGTGGCGCACGGGTGCGTAACGCGTGGGAATCTGCCCTTCGGTTCGGAATAACTCAGGGAAACTT-TCGCCGAGGGATGAGCCCGCGTAGGATTAGCTTGTTGGTGAGGTAAAGGCTCACCAAGGCGACGATCCTTAGCTGGTCTGAGAGGATGATCAGCCACACTGGGACTGAGACACGGCCCAG	0.0407083	0.0337325	0.117772	0.124844	0.115459	0.106157	0.0966884	0.0964489	0.08	0.147929	0.0732869	0.0754907	0.0905182	0.0735159	0.183501	0.180546	0.125905	0.185376	0.243487	0.18677	0.244907	0.106517	0.212718	0.10767	0.176917	0.119491	0.106736	0.0848382	0.0946273	0.090871	0.10383	0.141568	Bacteria	Proteobacteria	Alphaproteobacteria	Sphingomonadales	Sphingomonadaceae	Sphingomonas
147	AGCGAACGCTGGCGGCAGGCTTAACACATGCAAGTCGAGCGGGCGTAGCAATACGTCAGCGGCAGACGGGTGAGTAACGCGTGGGAACATACCTTTTGGTTCGGAACAACACAGGGAAAC-TCGCCGAAAGATTGGCCCGCGTCTGATTAGCTAGTTGGTGAGGTAATGGCTCACCAAGGCGACGATCAGTAGCTGGTCTGAGAGGATGATCAGCCACATTGGGACTGAGACACGGCCCAA	0.17301	0.202395	0.200212	0.202871	0.346376	0.2477	0.435098	0.254274	0.08	0.0924556	0.164896	0.0754907	0.135777	0.147032	0.0957396	0.0451365	0.0314762	0.0823893	0.0486973	0.0622568	0.111321	0.0387334	0.0447828	0.0696688	0.084246	0.0351444	0.0474383	0.0363592	0	0.0838809	0.0865251	0.0530879	Bacteria	Proteobacteria	Alphaproteobacteria	Rhizobiales	Bradyrhizobiaceae	Bradyrhizobium
148	AGCGAACGCTGGCGGCGTACTTAACACATGCAAGTCGAACGAGGATCACCGGTGTAGCAATACATTGTTGATCCTAGTGGCGCACGGGTGAGTAACACGTGGGTGACCTGCCCTTGAGCT-CCGCTCTTGGAGGGGCTCGCGGCCTATCAGCTAGTTGGCGGGGTAACGGCCCACCAAGGCTATGACGGGTAGCTGGTCTGAGAGGACGACCAGCCACACGGGGACTGAGACACGGCCCCG	0.0203542	0.0168663	0.117772	0.101436	0.128287	0.0606612	0.394811	0.350723	0.115556	0.0184911	0.0916086	0.0251636	0.0226296	0.128653	0.135631	0.0789889	0.0629525	0.0411946	0	0.140078	0.0667928	0.106517	0.100761	0.0760023	0.101095	0.0562311	0.142315	0.121197	0.157712	0.118831	0.121135	0.0825813	Bacteria	un_Bacteria	un_Bacteria	un_Bacteria	un_Bacteria	un_Bacteria
149	GATGAACGCTAGCGGCAGGCTTAATACATGCAAGTCGAGGGGCAGCAGGACTGTAGCAATACAGTTGCTGGCGACCGGCAAACGGGTGCGGAACACGTACGCAACCTTCCTTTAAGTGAG-GCGCTTGAAGATGGGCGTGCGACTGATTAGGTAGTTGGCGGGGTAACGGCCCACCAAGCCTGCGATCAGTAACTGGTGTGAGAGCACGACCAGTCACACGGGCACTGAGACACGGGCCCG	0.0101771	0.0168663	0.0824402	0.0390137	0.0577293	0.0404408	0.0805737	0.0701447	0.16	0.129438	0.0916086	0.0503271	0.135777	0.0551369	0.271262	0.383661	0.409191	0.0205973	0.146092	0.077821	0.289436	0.232401	0.291088	0.139338	0.193766	0.140578	0.189753	0.302994	0.252339	0.167762	0.213429	0.188757	Bacteria	Bacteroidetes	Sphingobacteria	Sphingobacteriales	Chitinophagaceae	Flavitalea
150	AGCGAACGTTAGCGGCGCGCCTAACACATGCAAGTCGCACGCGAAAGGGGGCAACCCTGAGTAAAGTGGCGCACGGGTGCGTAACACGTAGATAACCTGCCCTTTGAAGGGGGATAACGT-TCGTCAAAGGAGGGGTCTGCGGCCCATCAGCTAGTTGGTGAGGTAATGGCTCACCAAGGCAAAGACGGGTAGCTGGTCTGAGAGGATGATCAGCCACACTGGTACTGGAACACGGACCAG	0.264604	0.0505988	0.117772	0.202871	0.128287	0.171873	0.193377	0.298115	0.0444444	0.0369822	0.10993	0.0251636	0.0226296	0.0918949	0.0558481	0.0451365	0.0314762	0.0205973	0.0486973	0.0155642	0.0333964	0.0677835	0.0111957	0.0696688	0.042123	0.0702889	0.0830171	0.0969579	0.0210283	0.0699007	0.0692201	0.0884799	Bacteria	Proteobacteria	Deltaproteobacteria	Myxococcales	Polyangiaceae	un_Polyangiaceae
151	AACGAACGTTAGCGGCGCGCTTAACACATGCAAGTCGTACGGAATCGGGGCAACCCGGTTCAGTGGCGCACGGGTGAGTAACACGTAGGTAATCTTCCCTCGAGTGGTGGATAACCTTCC-GCGCTCGAGGATGAGCCTGCGGCCCATCAGGTAGTTGGTAGGGTAATGGCCTACCAAGCCGAAGACGGGTAGCTGGTCTGAGAGGATGGTCAGCCACACTGGAACTGAGACACGGTCCAG	0.254427	0.168663	0.223766	0.117041	0.0641437	0.0960469	0.0805737	0.18413	0.204444	0.16642	0.128252	0.100654	0.0905182	0.0367579	0.103718	0.0677048	0.0472144	0.123584	0.121743	0.0622568	0.0222643	0.0774668	0.0335871	0.0823358	0.0673968	0.0913756	0.0830171	0.0363592	0.0105141	0.097861	0.144209	0.112075	Bacteria	Proteobacteria	Deltaproteobacteria	Myxococcales	un_Myxococcales	un_Myxococcales
152	AACGAACGCTGGCGGCGCGCTTAACACATGCAAGTCGAGCGGTCTGTAGCAATACAGGCAGCGGCGAACGGGTGAGTAACACGTGGGTAATCTGCCCTCGAGTCTGGGATAACCCGGCGA-ACGCTCAAGGATGAGCCCGCGGCCCATCAGCTAGTTGGCGGGGTAATGGCCCACCAAGGCTACGACGGGTAGCTGGTCTGAGAGGACGACCAGTCACACTGGAACTGAGACACGGTCCAG	0.468146	0.354191	0.153103	0.101436	0.0833868	0.101102	0.145033	0.131521	0.142222	0.110947	0.128252	0.0754907	0.158407	0.202169	0.079783	0.101557	0.0629525	0.123584	0.0486973	0.0933852	0.0667928	0.0677835	0.0447828	0.0760023	0.0673968	0.105433	0.106736	0.0727185	0.0630848	0.0838809	0.0865251	0.0943786	Bacteria	Proteobacteria	Deltaproteobacteria	Myxococcales	Cystobacteraceae	Anaeromyxobacter
153	ATTGAACGCTGGCGGCATGCTTTACACATGCAAGTCGAACGGCAGCACGGGAGCAATCCTGGTGGCGAGTGGCGAACGGGTGAGTAATGCATCGGAACGTGCCCAGTCGTGGGGGATAAC-GCGCGATTGGAGCGGCCGATGTCAGATTAGGTAGTTGGTGGGGTAAAGGCTCACCAAGCCAACGATCTGTAGCTGGTCTGAGAGGACGACCAGCCACACTGGGACTGAGACACGGCCCAG	0.223896	0.185529	0.600636	0.195069	0.218089	0.25781	0.120861	0.131521	0.00888889	0.0184911	0.0366435	0.0754907	0	0.0551369	0.199457	0.0451365	0.0472144	0.0205973	0	0.0311284	0.0556607	0.0193667	0.0223914	0.0633352	0.0336984	0.0210867	0.0118596	0.0242395	0.0315424	0.0489305	0.0403784	0.0294933	Bacteria	Proteobacteria	Betaproteobacteria	Burkholderiales	Comamonadaceae	Hydrogenophaga
154	GACGAACGCTGGCGGCGTGCTTAACACATGCAAGTCGAGCGGAAAGGCCCTTCGGGGTACTCGAGCGGCGAACGGGTGAGTAACACGTGAGCAACCTGCCCTTAGCTTTGGGATAACCCT-TCGGCTAGGGATGGGCTCGCGGCCTATCAGCTTGTTGGTGGGGTGATGGCCTACCAAGGCGACGACGGGTAGCCGGCCTGAGAGGGCGACCGGCCACACTGGGACTGAGACACGGCCCAG	0.0101771	0	0.0588859	0.0234082	0.0769724	0.0808816	0.112803	0.403332	0	0.0184911	0.0183217	0	0	0	0.0079783	0.0225683	0.0314762	0	0	0.0311284	0.0667928	0.0290501	0.0671742	0.0316676	0.0336984	0.0562311	0.177894	0.206036	0.115656	0.293583	0.271112	0.259541	Bacteria	Actinobacteria	Actinobacteria	Actinomycetales	Micromonosporaceae	un_Micromonosporaceae
155	GATGAACGCTGGCGGCGTGCCTTAGACATGCAAGTCGAACGAAGCACCCACAACTGATCGCTTCGGTGTGAGGAAATGGGTGACTTAGTGGCGAACGGGTGAGTAACACGTGAGTGACCT-TCGCTTCGGGATGGGCTCGCGGTCCATCAGCTAGTTGGTAGGGTAATGGCCTACCAAGGCGACGACGGATAGCCGGCCTGAGAGGGTGTACGGCCACAGGGGCACTGAGATACGGGTCCC	0.0915937	0.168663	0.353315	0.273096	0.25016	0.187039	0.233664	0.263043	0.0444444	0.0184911	0.0183217	0.0251636	0.0452591	0.018379	0.143609	0.112841	0.0629525	0.102987	0.073046	0.0155642	0.133586	0.125884	0.179131	0.177339	0.269587	0.140578	0.237192	0.302994	0.410052	0.188732	0.149977	0.165163	Bacteria	Deinococcus-Thermus	Deinococci	Deinococcales	Trueperaceae	Truepera
156	AATCAACGCTGGCGGCGTGCCTAATACATGCAAGTCGGACGCGAAGACCCCGCAAGGGGTTGGTAGCGTGGCAAACGGGTGAGTAACGCGTGGGCGACCTGCCTTCGAGTGGGGGATAAC-GCGCTTGAAGAGGGGCCTACGTCCGATTAGCTAGTTGGTGGGGTAATGGCCTACCAAGGCGACGATCGGTAGCCGGCCTGAGAGGGCGGACGGCCACACTGGGACTGAGACACGGCCCAG	0.0203542	0.0505988	0.0588859	0.0468165	0.0449006	0.0556061	0.0322295	0.0613766	0.248889	0.184911	0.311469	0.201309	0.135777	0.110274	0.127653	0.157978	0.0786906	0.164779	0.121743	0.124514	0.133586	0.154934	0.179131	0.228007	0.20219	0.182751	0.27277	0.121197	0.115656	0.090871	0.13844	0.135669	Bacteria	Acidobacteria	Acidobacteria_Gp6	Acidobacteria_Gp6	Acidobacteria_Gp6	Gp6
157	AATCAACGCTGGCGGCGTGCCTCAGACATGCAAGTCGAACGATTAAAGCTCCCTTCGGGGAGTGCATAAAGTGGCGCACGGGTGAGTAACACGTAAGTAATCTACCCTCGGGTGGGGAAT-TTGCCTGGGGAGGAGCTTGCGGCAGATTAGCTTGTTGGTAAGGTAACGGCTTACCAAGGCTACGATCTGTATCCGGTCTAAGAGGACGGTCGGACACACTGACACTGAATAACGGGTCAG	0.0203542	0.0505988	0.129549	0.132647	0.179602	0.116267	0.217549	0.122753	0.0533333	0.110947	0.0732869	0.0754907	0.0905182	0.0551369	0.127653	0.101557	0.0629525	0.061792	0	0.077821	0.0445286	0.0484168	0.134348	0.0886693	0.0758214	0.0773178	0.130455	0.0969579	0.147198	0.0349504	0.0692201	0.100277	Bacteria	Acidobacteria	Acidobacteria_Gp4	Acidobacteria_Gp4	Acidobacteria_Gp4	Gp4
158	ATTGAACGCTGGCGGCATGCTTTACACATGCAAGTCGAACGGCAGCACGGGGGCAACCCTGGTGGCGAGTGGCGAACGGGTGAGTAATGCATCGGAACGTGCCCAGTAGTGGGGGATAAC-GCGCTATTGGAGCGGCCGATGTCCGATTAGCTAGTTGGTGGGGTAATGGCCTACCAAGGCAACGATCGGTAGCTGGTCTGAGAGGATGATCAGCCACACTGGGACTGAGACACGGCCCAG	0.0508854	0.13493	0.259098	0.195069	0.301475	0.25781	0.668762	0.403332	0.0622222	0	0.0183217	0.0251636	0.0226296	0.0918949	0.0319132	0.0338524	0.0314762	0.0411946	0.0243487	0.0466926	0.0556607	0.0290501	0.0895656	0.0316676	0.0336984	0.0210867	0.154175	0.0727185	0.12617	0.104851	0.0980618	0.106176	Bacteria	Proteobacteria	Betaproteobacteria	un_Betaproteobacteria	un_Betaproteobacteria	un_Betaproteobacteria
159	AACGAACGCTGGCGGCAGGCCTAACACATGCAAGTCGAAGGAGAAGTTCCTCTTCGGAGGGATGGACACTGGCGCACGGGTGAGTAACGCGTGGGAATCTACCCCGGGGTGGGGAATAAC-GCGCCCTGGGATGAGCCCGCGTTAGATTAGCTAGTTGGTGGGGTAATGGCCCACCAAGGCGACGATCTATAGCTGGTCTGAGAGGATGATCAGCCACACTGGGACTGAGACACGGCCCAG	0.0101771	0.0337325	0.0942174	0.031211	0.0705581	0.0556061	0.249778	0.0964489	0.0177778	0.0184911	0	0	0.0226296	0.018379	0.0718047	0.0225683	0.0786906	0.0205973	0	0.0311284	0.122454	0.0677835	0.111957	0.0316676	0.0505476	0.105433	0.177894	0.375712	0.410052	0.244653	0.10383	0.147467	Bacteria	Proteobacteria	Alphaproteobacteria	Rhodospirillales	Rhodospirillaceae	Pelagibius
160	GATGAACGCTAGCGGCAGGCTTAACACATGCAAGTCGAGGGGCAGCATAGGTACTTGTACCTGATGGCGACCGGCGGACGGGTGAGTAACGCGTATGGAACCTACCTTTTACAGGGGGAT-TCGGTAAAAGATGGCCATGCGTTCTATTAGCTAGATGGTAAGGTAACGGCTTACCATGGCTACGATAGATAGGGGCCCTGAGAGGGGGATCCCCCACACTGGTACTGAGACACGGACCAG	0.203542	0.168663	0.105995	0.148252	0.0962155	0.161763	0.0644589	0.0613766	0.115556	0.110947	0.128252	0.0503271	0.181036	0.128653	0.111696	0.124125	0.0629525	0.144181	0.121743	0.202335	0.0333964	0.0581001	0.0559785	0.152005	0.117944	0.112462	0.0237192	0.048479	0.0525707	0.104851	0.0634518	0.0825813	Bacteria	Bacteroidetes	Flavobacteria	Flavobacteriales	Flavobacteriaceae	Formosa
161	AACGAACGCTGGCGGCGTGCTTAACACATGCAAGTCGAGCGAGAAAGGGACTTCGGTCCTGAGTACAGCGGCGAACGGGTGCGTAACACGTGGATAATCTGCCTTCGGGCTTGGAATAAC-TCACCTGAAGATGAGTCCGCGGCCCATCAGCTAGTTGGCGGGGTAATGGCCCACCAAGGCTACGACGGGTAGCTGGTCTGAGAGGACGATCAGCCACACTGGGACTGAGACACGGCCCAG	0.254427	0.13493	0.188435	0.195069	0.121873	0.22748	0.169205	0.341955	0.0266667	0.0184911	0.0549652	0.0251636	0	0.018379	0.0398915	0.0112841	0.0157381	0.0411946	0	0.0311284	0.0222643	0.0774668	0.0111957	0.0380011	0.0168492	0.0984044	0.0237192	0.0363592	0	0.0629107	0.126904	0.0825813	Bacteria	Proteobacteria	Deltaproteobacteria	Myxococcales	Cystobacteraceae	un_Cystobacteraceae
162	AACGAACGCTGGCGGCATGCCTAACACATGCAAGTCGAGCGCTCTCCTTCGGGAGGGAGCGGCGCACGGGTGAGTAACGCGTGGGAACCTGCCCTGGGGTGGGGGATAACCGGTGGAAAC-TCGCCCTGGGAGGGGCCCGCGTCCGATTAGCTAGTTGGTGGGGTAACGGCCTACCAAGGCGACGATCGGTAGCTGGTCTGAGAGGATGACCAGCCACACTGGGACTGAGACACGGCCCAG	0.0101771	0.0168663	0.117772	0.0702247	0.109044	0.156708	0.136975	0.0964489	0	0	0.0183217	0.0251636	0	0.018379	0.0638264	0.0789889	0.110167	0.123584	0.170441	0.124514	0.0890571	0.14525	0.0559785	0.0760023	0.126369	0.0702889	0.130455	0.109078	0.12617	0.118831	0.10383	0.112075	Bacteria	Proteobacteria	Alphaproteobacteria	Rhodospirillales	un_Rhodospirillales	un_Rhodospirillales
163	GATGAACGCTAGCGGCAGGCCTAATACATGCAAGCCGAACGGTAAGATTGGTAGCAATACTGATCTGAGAGTGGCGTACGGGTGCGTAACACGTATGCAACCTACCCGAAACTGGAGGAT-GTGGTTTCGGATGGGCATGCGCATGATTAGCTAGTTGGTGGTGTAACGGACTACCAAGGCGATGATCATTAGGGGACCTGAGAGGGTGATCCCCCACACTGGCACTGAGATACGGGCCAG	0.0610625	0.067465	0.0117772	0.0156055	0.0513149	0.0050551	0	0.00876808	0.337778	0.295858	0.256504	0.377453	0.248925	0.367579	0.159566	0.19183	0.173119	0.102987	0.146092	0.18677	0.122454	0.135567	0.111957	0.101336	0.143218	0.119491	0.0711575	0.193916	0.168226	0.097861	0.0865251	0.0825813	Bacteria	Bacteroidetes	Bacteroidetes_i.s.	Bacteroidetes_i.s.	Bacteroidetes_i.s.	Ohtaekwangia
164	GACGAACGCTGGCGGCGTGCTTAACACATGCAAGTCGAGCGGTAAGGCTCCTTCGGGAGTACACGAGCGGCGAACGGGTGAGTAACACGTGAGCAATCTGCCCTTCACTTCGGGATAACT-GCGGTGAAGGATGAGCTCGCGGCCTATCAGCTTGTTGGTGGGGTAACGGCCCACCAAGGCAACGACGGGTAGCCGGCCTGAGAGGGTGACCGGCCACACTGGGACTGAGACACGGCCCAG	0.529208	0.387924	0.471087	0.499376	0.262989	0.475179	0.314237	0.561157	0.0622222	0.110947	0.146574	0.0754907	0.135777	0.0551369	0.0718047	0.0677048	0.0472144	0.0205973	0.0486973	0.077821	0.0445286	0.0677835	0.0223914	0.0253341	0.0336984	0.0421733	0.0830171	0.0727185	0.0210283	0.0838809	0.190355	0.0884799	Bacteria	Actinobacteria	Actinobacteria	Actinomycetales	Nocardioidaceae	Marmoricola
165	AACGAACGCTGGCGGCAGGCCTAACACATGCAAGTCGAACGAGAAGCTGGCTTCGGTCAGTGGAGAGTGGCGCACGGGTGAGTAACGCGTGGGAATTTGCCTTTCGGTACGGGATAACGT-TCGCCGAGAGAGGAGCCCGCGTAGGATTAGGTAGTTGGTGGGGTAATGGCTCACCAAGCCGACGATCCTTAGCTGTTCTGAGAGGAAGATCAGCCACACTGGGACTGAGACACGGCCCAG	0.122125	0.0843313	0.153103	0.156055	0.121873	0.0859367	0.0725163	0.0789128	0.106667	0.16642	0.128252	0.201309	0.226296	0.147032	0.0877613	0.146694	0.157381	0.164779	0.0973947	0.140078	0.111321	0.135567	0.145544	0.120337	0.193766	0.133549	0.0948767	0.0605987	0.0841131	0.125821	0.0980618	0.0471893	Bacteria	Proteobacteria	Alphaproteobacteria	Sneathiellales	Sneathiellaceae	Sneathiella
166	AACGAACGCTGGCGGCAGGCCTAACACATGCAAGTCGAACGATAAGCCACCTTCGGGTGGTGGACAGTGGCAGACGGGTGAGTAACGCGTGGGAACGTGCCTTTCGGTTCGGAATAACCC-TTGCCGAAAGATCGGCCCGCGTCGGATTAGCTAGTTGGTGGGGTAATGGCTCACCAAGGCGACGATCCGTAGCTGGTCTGAGAGGATGACCAGCCACACTGGGACTGAGACACGGCCCAG	0.0101771	0.0337325	0.0706631	0.132647	0.0705581	0.0707714	0.120861	0.0789128	0.115556	0.0739645	0.10993	0.100654	0.158407	0.0367579	0.0957396	0.180546	0.0786906	0.0411946	0.0973947	0.108949	0.077925	0.0774668	0.0447828	0.10767	0.0926706	0.112462	0.130455	0.145437	0.0841131	0.188732	0.155745	0.188757	Bacteria	Proteobacteria	Alphaproteobacteria	Rhizobiales	un_Rhizobiales	un_Rhizobiales
167	AACGAACGTTGGCGGCGTGGATTAGGCATGCAAGTCGAACGCGAAAGGGGTAGCAATACCCCGAGTAAAGTGGCGAACGGGTGAGTAACGCGTAGGAAACCTGCCTTCGAGTGGGGGATA-CCGCTCAAAGATGGTCCTGCGTCCCATTAGCTAGTTGGTGGGGTAACGGCCTACCAAGGCGACGATGGGTAGCCGATCTGAGAGGATGACCGGCCACACTGGGACTGAGATACGGCCCAG	0.0814166	0.0337325	0.117772	0.124844	0.0833868	0.0454959	0.0725163	0.0789128	0.142222	0.0369822	0.10993	0.125818	0.203666	0.128653	0.127653	0.157978	0.0629525	0.185376	0.0486973	0.0622568	0.0667928	0.0290501	0.0783699	0.101336	0.0926706	0.0702889	0.106736	0.0727185	0.0525707	0.0279603	0.0519151	0.112075	Bacteria	un_Bacteria	un_Bacteria	un_Bacteria	un_Bacteria	un_Bacteria
168	GACGAACGCTGGCGGCGTGCTTAACACATGCAAGTCGAACGGAAAGGCCCTTCGGGGTACTCGAGTGGCGAACGGGTGAGTAACACGTGGGTGATCTGCCCTGCACTTTGGGATAAGCCT-GCGGTGTGGGATGGGCCCGCGGCCTATCAGCTTGTTGGTGGGGTGATGGCCTACCAAGGCGACGACGGGTAGCCGGCCTGAGAGGGTGACCGGCCACACTGGGACTGAGATACGGCCCAG	0.111948	0.13493	0.105995	0.0780275	0.153945	0.0859367	0.112803	0.0789128	0.0444444	0	0.0732869	0.0251636	0.113148	0.0551369	0.111696	0.0451365	0.0472144	0.0823893	0.0243487	0.077821	0.111321	0.222717	0.0559785	0.0443347	0.0758214	0.105433	0.166034	0.121197	0.0420566	0.125821	0.126904	0.129771	Bacteria	Actinobacteria	Actinobacteria	Actinomycetales	Mycobacteriaceae	Mycobacterium
169	GATGAACGCTGGCGGCGTGCCTTAGACATGCAAGTCGAACGAAGCATCTTTCTCCGATCCCTTCGGGGTGAAGAGACTGATGACTTAGTGGCGAACGGGTGAGTAACACGTGGGTGACCT-TCGCTTCGGGATGGGCCCGCGGTCCATCAGCTAGTTGGTAGGGTAATGGCCTACCAAGGCGACGACGGATAGCCGGCCTGAGAGGGCGATCGGCCACAGGGGCACTGAGACACGGGCCCC	0.223896	0.13493	0.0942174	0.202871	0.10263	0.121322	0.0805737	0.192898	0.0888889	0.147929	0.128252	0.100654	0.0678887	0.0918949	0.0558481	0	0.0472144	0.061792	0.0486973	0.0466926	0.100189	0.0871502	0.0671742	0.0443347	0.0505476	0.112462	0.0711575	0.0727185	0.0630848	0.0768908	0.0749885	0.0530879	Bacteria	Deinococcus-Thermus	Deinococci	Deinococcales	Trueperaceae	Truepera
170	GATGAACGCTAGCGGCAGGCCTAACACATGCAAGTCGAACGGTAACAGGAATTAGCTTGCTAATTTGCTGACGAGTGGCGCACGGGTGCGTAACGCGTATGCAACTTACCTCTAACAGGA-GTGGTTAGAGATAGGCATGCGTCCTATTAGCTAGTTGGTGAGGTAACAGCTCACCAAGGCGATGATAGGTAGGGGGCCTGAGAGGGTTATCCCCCACACTGGTACTGAGACACGGACCAG	0.519031	0.725249	0.117772	0.093633	0.115459	0.050551	0.0241721	0.00876808	0.231111	0.110947	0.183217	0.226472	0.339443	0.312443	0.0319132	0.124125	0.0629525	0.0205973	0.0243487	0.0466926	0.0445286	0.0484168	0.0111957	0.0443347	0.0168492	0.0281156	0.0237192	0	0.0210283	0	0.0115367	0.00589866	Bacteria	Bacteroidetes	Flavobacteria	Flavobacteriales	Cryomorphaceae	Owenweeksia
171	AACGAACGCTGGCGGCAGGCTTAACACATGCAAGTCGAGCGCCTCAGCAATGGGGAGCGGCAGACGGGTGAGTAACGCGTGGGAATCTACCCATCTCTACGGAACAACTGCGGGAAACTG-TCGGAGATGGATGAGCCCGCGTTGGATTAGCTAGTTGGTAGGGTAATGGCCTACCAAGGCGACGATCCATAGCTGGTCTGAGAGGATGATCAGCCACACTGGGACTGAGACACGGCCCAG	0.0203542	0.0505988	0.0235544	0.0468165	0.0449006	0.0606612	0.0483442	0.0526085	0.0888889	0.0369822	0.0183217	0.0503271	0.0905182	0.147032	0.127653	0.101557	0.0786906	0.123584	0.0243487	0.077821	0.178114	0.106517	0.0895656	0.0823358	0.126369	0.0984044	0.142315	0.157557	0.189255	0.167762	0.115367	0.147467	Bacteria	Proteobacteria	Alphaproteobacteria	Rhizobiales	Phyllobacteriaceae	Mesorhizobium
172	GATGAACGCTAGCGGCAGGCTTAACACATGCAAGTCGAGGGGTAACAGGGAAGCTTGCTTCCGCTGACGACCGGCGCACGGGTGCGTAACACGTATGGAATCTGCCCTTTACTGGAGAAT-GCGGTAAAGGATGACCATGCGCCTGATTAGTTTGTTGGTGAGGTAACGGCTCACCAAGACTACGATCAGTAGGGGGCCTGAGAGGGTTATCCCCCACACTGGTACTGAGACACGGACCAG	0.132302	0.286726	0.153103	0.140449	0.115459	0.0707714	0.0725163	0.105217	0.133333	0.147929	0.128252	0.0754907	0.135777	0.165411	0.0957396	0.0902731	0.0629525	0.0823893	0.073046	0.0466926	0.0667928	0.0871502	0.0671742	0.0823358	0.10952	0.133549	0.0830171	0.0727185	0.115656	0.0419404	0.0807568	0.100277	Bacteria	Bacteroidetes	Flavobacteria	Flavobacteriales	Cryomorphaceae	un_Cryomorphaceae
173	GATGAACGCTAGCGGCAGGCCTAATACATGCAAGTCGAGGGGCAGCAGGAGTAGCAATACTCGCTGGCGACCGGCGCACGGGTGCGTAACACGTATACAATCTGCCTTTAACAGGGGGAT-GCGGTTAAAGATGAGTATGCGCCTGATTAGCTAGTTGGTGAGGTAACGGCTCACCAAGGCGACGATCAGTAGGGGATCTGAGAGGACTACCCCCCACACGGATACTGAGACACGGATCCG	0.0407083	0.168663	0.0824402	0.062422	0.14753	0.0808816	0.217549	0.105217	0.0355556	0.0184911	0	0.100654	0.0452591	0.0367579	0.0877613	0.0564207	0.0629525	0.061792	0.0973947	0.0155642	0.0890571	0.0581001	0.0895656	0.0570017	0.0758214	0.0562311	0.0711575	0.121197	0.115656	0.0699007	0.0980618	0.035392	Bacteria	Bacteroidetes	un_Bacteroidetes	un_Bacteroidetes	un_Bacteroidetes	un_Bacteroidetes
174	GATGAACGCTGGCGGCGTGCCTAAGGTATGCAAGTCGAACGATCTCGGTTTACCGAGATAGTGGCAGACGGCTGAGTAATATGCAGAAACGTACCCTTAACACAGGTATACCCCCGGGAA-GCGGTTAAGGACCGGTCTGCAGCCTATCAGCTAGTTGGTGGGGTAAAGGCCTACCAAGGCTATGACGGGTAGGGGGCCTGAGAGGGCGATCCCCCAGAATGGGACTGCGACACGGCCCAT	0	0	0	0.00780275	0.0128287	0	0.104746	0.0350723	0	0	0	0	0	0.018379	0.0159566	0.0112841	0.0157381	0	0	0	0.0556607	0.0871502	0.0783699	0.10767	0.0168492	0.00702889	0.225332	0.569628	0.452108	0.237663	0.149977	0.123872	Bacteria	un_Bacteria	un_Bacteria	un_Bacteria	un_Bacteria	un_Bacteria
175	AACGAACGTTGGCGGCGTGGATGAGGCATGCAAGTCGAGCGAGAAAGCGCCTTCGGGCGTGAGTACAGCGGCGGACGGGTGAGTAACACGTAATCAAGCTGCCCTCGAGACCGGGATAAC-CCGTTCGAGGAGGCGATTGCGGCCTATCAGCTTGTTGGCGGGGTAATGGCCCACCAAGGCGACGACGGGTAGCAGGCCTGAGAGGGTGGTCTGCCACACTGGGACTGAGATACTGCCCAG	0.0101771	0	0.105995	0.117041	0.179602	0.0859367	0.475385	0.341955	0	0	0	0	0	0	0	0	0	0	0.0243487	0.0155642	0.0667928	0.0290501	0.0559785	0.0190006	0.0084246	0.0281156	0.154175	0.157557	0.273368	0.0699007	0.0807568	0.0530879	Bacteria	un_Bacteria	un_Bacteria	un_Bacteria	un_Bacteria	un_Bacteria
176	GACGAACGCTGGCGGCGCGCTTAACACATGCAAGTCGAGCGAGAACCAGTCCTTCGGGACTGGGGACAGCGGCGAACGGGTGAGTAACACGTGGGTAATCTGCCCTCGGCACCGGAATAG-CCGGCCGAGGATGAGCCCGCGGCCGATTAGCTTGTTGGTGAGGTAACGGCTCACCAAGGCGACGATCGGTAGCTGGTCTGAGAGGACGATCAGCCACACTGGGACTGAGACACGGCCCAG	0.0407083	0.0168663	0.0117772	0.0390137	0.0320718	0.0303306	0.0322295	0.0526085	0.151111	0.0554734	0.164896	0.0251636	0.0226296	0.110274	0.119674	0.0902731	0.0786906	0.0823893	0.073046	0.171206	0.0222643	0.0871502	0.0895656	0.101336	0.10952	0.0702889	0.166034	0.145437	0.0525707	0.174752	0.132672	0.200554	Bacteria	un_Bacteria	un_Bacteria	un_Bacteria	un_Bacteria	un_Bacteria
177	GATGAACGCTAGCGGCAGGCCTAACACATGCAAGTCGAGGGGTAACGGGGTGCTTGCACCGCCGACGACCGGCGCACGGGTGAGCAACGCGTATAGAACCTACCCGTTACAGGGGGATAG-TCGGTAACGGATGGCTGTGCGTCCCATTAGCTAGTTGGGGGGGTAACGGCCCACCAAGGCGTCGATGGGTAGGGGCCCTGAGAGGGGGATCCCCCACACTGGTACTGAGACACGGACCAG	0.132302	0.067465	0.117772	0.101436	0.0256575	0.0556061	0.0402868	0.0613766	0.0977778	0.0739645	0.219861	0.201309	0.271555	0.147032	0.0638264	0.101557	0.0786906	0.0823893	0.243487	0.155642	0.100189	0.14525	0.100761	0.0886693	0.10952	0.105433	0.0711575	0.157557	0.0630848	0.0838809	0.0519151	0.100277	Bacteria	Bacteroidetes	Flavobacteria	Flavobacteriales	Flavobacteriaceae	Arenibacter
178	GATGAACGCTAGCGGCAGGCCTAATACATGCAAGCTGAACGGTAAATATTGTAGCAATACAATATGAGAGTAGCGTAAGGGTGCGTAACACGTATGCAATCTGCCCTGTACAGGAGGATA-ATGGTACAGGATGAGCATGCGTCTGATTAGCTAGTTGGTGGTGTAACGGACCACCAAGGCGATGATCAGTAGGGGAACTGAGAGGTTGATCCCCCACACTGGCACTGAGATACGGGCCAG	0.0203542	0.0505988	0.0353315	0.031211	0.0769724	0.0404408	0.322295	0.122753	0	0	0.0183217	0	0.0226296	0.018379	0.0957396	0.0225683	0.0314762	0.0411946	0	0.0466926	0.077925	0.0774668	0.0895656	0.0506682	0.0505476	0.06326	0.343928	0.363592	0.220797	0.097861	0.126904	0.200554	Bacteria	Bacteroidetes	Bacteroidetes_i.s.	Bacteroidetes_i.s.	Bacteroidetes_i.s.	Ohtaekwangia
179	AACGAACGTTGGCGGCGTGGATGAGGCATGCAAGTCGCGCGTGAAAGTTCCTTCGGGAACGAGTAAAGCGGCGGACGGGTGAGGAATACGTAATCAAGCTGCCCCCGAGACGGGGATAAC-CTGCTCGGGGATGCGATTACGGCCTATCAGCTAGTTGGTGGGGTAATGGCCCACCAAGGCTACGACGGGTAGCCGGCCTGAGAGGGTGGTCGGCCACACTGGGACTGAGACACTGCCCAG	0.24425	0.13493	0.0824402	0.101436	0.0898012	0.050551	0.0241721	0.0701447	0.0711111	0.221893	0.10993	0.150981	0.158407	0.220548	0.0239349	0.0338524	0.0629525	0.061792	0.0973947	0.077821	0.100189	0.1162	0.0559785	0.0760023	0.126369	0.0562311	0.0355787	0.048479	0.0841131	0.0699007	0.0922935	0.0412906	Bacteria	un_Bacteria	un_Bacteria	un_Bacteria	un_Bacteria	un_Bacteria
180	GATGAACGCTAGCGGCAGGCCTAACACATGCAAGTCGAGGGGCAACGGGGGTGAGCTTGCTCACCTGCCGGCGACCGGCGCACGGGTGCGCAACGCGTATGGAACCTGCCTTTTACAGGG-GCGGTAGAAGATGGCCATGCGTCCCATTAGCTGGTTGGTGCGGTAACGGCGCACCAAGGCCGCGATGGGTAGGGGCCCTGAGAGGGGGATCCCCCACACTGGTACTGAGACACGGACCAG	0.0508854	0.0505988	0.105995	0.17166	0.0577293	0.0606612	0.0886311	0.149057	0.0888889	0.0554734	0.164896	0.0503271	0.0452591	0.0918949	0.295197	0.101557	0.173119	0.102987	0.194789	0.155642	0.100189	0.0581001	0.134348	0.190006	0.227464	0.161664	0.0948767	0.169676	0.105141	0.167762	0.10383	0.159264	Bacteria	Bacteroidetes	Flavobacteria	Flavobacteriales	Flavobacteriaceae	un_Flavobacteriaceae
181	GATGAACGCTGGCGGCGTGCTTAACACATGCAAGTCGAACGATGATCCGGTGCTTGCACCGGGGATTAGTGGCGAACGGGTGAGTAACACGTGAGTAACCTGCCCTTGACTCTGGGATAA-GCGGTTTTGGATGGACTCGCGGCCTATCAGCTTGTTGGTGAGGTAATGGCTCACCAAGGCGACGACGGGTAGCCGGCCTGAGAGGGTGACCGGCCACACTGGGACTGAGACACGGCCCAG	0.234073	0.236128	0.200212	0.257491	0.10263	0.202204	0.120861	0.271811	0.204444	0.0739645	0.10993	0.0251636	0.113148	0.0735159	0.0638264	0.112841	0.0472144	0.144181	0.073046	0.0933852	0.0445286	0.0484168	0.0335871	0.0823358	0.101095	0.161664	0.0830171	0.0848382	0.0210283	0.174752	0.167282	0.194656	Bacteria	Actinobacteria	Actinobacteria	Actinomycetales	Micrococcaceae	Arthrobacter
182	GATAAACGCTGGCGGCGTGCCTAATGCATGCAAGTCGCACGGGAGCCCCTGCGGGGGTCGACCGTGGCGGACGGGTGAGGAACACGTGGCTAACCTGCCCACCTGTGGGGGATAACCCCG-GCGCAGGTGGAGGGGGCTGCGGCCGATTAGCTGGTTGGTGGGGTAATGGCCTACCAAGGCGGTGATCGGTAGCTGGTCTGAGAGGACGATCAGCCACACGGGGACTGAGACACGGCCCCG	0.162833	0.219261	0.0824402	0.093633	0.0641437	0.0758265	0.0966884	0.236738	0.106667	0.110947	0.0549652	0.0754907	0.158407	0.0918949	0.199457	0.0902731	0.0472144	0.102987	0.0973947	0.0622568	0.077925	0.106517	0.0559785	0.114003	0.143218	0.175722	0.0948767	0.133317	0.0841131	0.132811	0.144209	0.171061	Bacteria	Chloroflexi	Thermomicrobia	Sphaerobacterales	Sphaerobacteraceae	Sphaerobacter
183	GACGAACGCTGGCGGCGTGCTTAACACATGCAAGTCGAACGGTGAAGCCCAGCTTGCTGGGTGGATCAGTGGCGAACGGGTGAGTAACACGTGAGCAACCTGCCCTCCACTTCGGGATAA-TCGGTGGGGGATGGGCTCGCGGCCTATCAGCTTGTTGGTGGGGTAATGGCCTACCAAGGCGTCGACGGGTAGCCGGCCTGAGAGGGCGACCGGCCACACTGGGACTGAGACACGGCCCAG	0.101771	0.0505988	0.247321	0.17166	0.0256575	0.0758265	0.0644589	0.122753	0.0266667	0.0554734	0.0549652	0.0251636	0.0905182	0.0551369	0.263284	0.0225683	0.0314762	0.123584	0.121743	0.18677	0.0111321	0.0484168	0.0111957	0.0506682	0.0252738	0.12652	0.0474383	0.0848382	0.0210283	0.090871	0.126904	0.0648853	Bacteria	Actinobacteria	Actinobacteria	Actinomycetales	Promicromonosporaceae	Isoptericola
184	AGTGAACGCTGGCGGCAGGCCTAACACATGCAAGTCGAACGGCAGCGCAGGGGAGCTTGCTCCCCGGGCGGCGAGTGGCGGACGGGTGAGGAATACGTCGGAATCTGCCTTTTTGTGGGG-ACGCAGAAAGATGAGCCGACGTCGGATTAGCTAGTTGGTGGGGTAATGGCCCACCAAGGCGACGATCCGTAGCTGGTCTGAGAGGATGATCAGCCACACTGGGACTGAGACACGGCCCAG	0.223896	0.26986	0.176658	0.179463	0.0962155	0.156708	0.0886311	0.105217	0.133333	0.147929	0.329791	0.201309	0.0678887	0.0918949	0.0239349	0	0.0157381	0.0411946	0.073046	0.0622568	0.0667928	0.0484168	0.0111957	0.0570017	0.0505476	0.0702889	0.0474383	0.0121197	0.0420566	0.0489305	0.0576834	0.017696	Bacteria	Proteobacteria	Gammaproteobacteria	Xanthomonadales	Xanthomonadaceae	un_Xanthomonadaceae
185	AGTGAACGCTGGCGGCAGGCCTAACACATGCAAGTCGAACGGCAGCACAGGGGAGCTTGCTCCCTGGGTGGCGAGTGGCGGACGGGTGAGGAATACGTCGGAATCTACCTTTTTGTGGGG-ACGCAGATAGATGAGCCGACGTCGGATTAGCTAGTTGGTGGGGTAATGGCCCACCAAGGCGACGATCCGTAGCTGGTCTGAGAGGATGATCAGCCACACTGGAACTGAGACACGGTCCAG	0.0814166	0.101198	0.176658	0.366729	0.30789	0.449904	0.136975	0.324419	0.0177778	0.0184911	0	0	0.0452591	0.018379	0.0558481	0.0112841	0.0314762	0.0205973	0	0.0622568	0.0556607	0.0387334	0.0783699	0.0316676	0.0505476	0.0421733	0.0355787	0.0363592	0.0946273	0.0489305	0.0461467	0.0707839	Bacteria	Proteobacteria	Gammaproteobacteria	Xanthomonadales	Xanthomonadaceae	Luteimonas
186	AACGAACGTTAGCGGCGCGCTTAATACATGCAAGTCGAGCGAGAAAGGACTTCGGTCCCAGTAAAGCGGCGCACGGGTGAGTAACACGTAGGTCATCTACCCTCGGGTGGTGGATAACAC-GCGCCTGAGGATGAGCCTGCGGCGCATCAGCTAGTTGGTGGGGTAATAGCCCACCAAGGCTAAGACGCGTAGCTGGTCTGAGAGGATGAACAGCCACACTGGAACTGAGACACGGTCCAG	0.0101771	0.0168663	0.176658	0.358926	0.320718	0.0707714	0.322295	0.201666	0	0	0	0	0	0	0.0239349	0.0112841	0.0157381	0.0823893	0.0243487	0	0.0445286	0.0290501	0.0783699	0.00633352	0.0168492	0.00702889	0.0474383	0.121197	0.0420566	0.0209702	0.0230734	0.0471893	Bacteria	Proteobacteria	Deltaproteobacteria	Myxococcales	un_Myxococcales	un_Myxococcales
187	GATGAACGCTAGCGGCAGGCCTAATACATGCAAGTCGAGGGGCATCGCGGGCAGCAATGCCTGGCGGCGACCGGCGGACGGGTGCGTAACGCGTATGCAACCTGCCCCCTACCGGGGGAT-CCGGTAGGGGATGGGCATGCGTGCCATTAGCTAGTTGGTGGGGTAACGGCCCACCAAGGCTGCGATGGCTAGGGGGCCTGAGAGGGTGGTCCCCCACACTGGCACTGAGATACGGGCCAG	0.284958	0.252994	0.105995	0.062422	0.0641437	0.0404408	0.00805737	0.0175362	0.266667	0.240385	0.219861	0.201309	0.475221	0.257306	0.103718	0.101557	0.125905	0.102987	0.0486973	0.0622568	0.0333964	0.0387334	0.0559785	0.0760023	0.0505476	0.06326	0.0118596	0.0605987	0.0420566	0.0139801	0.0288417	0.0589866	Bacteria	Bacteroidetes	Sphingobacteria	Sphingobacteriales	Cyclobacteriaceae	un_Cyclobacteriaceae
188	ATTGAACGCTGGCGGCATGCTTTACACATGCAAGTCGAACGGCAGCACGGGGGCAACCCTGGTGGCGAGTGGCGAACGGGTGAGTAATACATCGGAACGTGTCTTAAAGAGGGGGATAAC-GCGCTTTTTGAGCGGCCGATGCCTGATTAGCTAGTTGGTAAGGTAATGGCTTACCAAGGCAACGATCAGTAGCTGGTCTGAGAGGACGACCAGCCACACTGGGACTGAGACACGGCCCAG	0.0101771	0	0.223766	0.132647	0.211674	0.298251	0.128918	0.131521	0.0266667	0	0.0183217	0	0	0	0.0558481	0.0902731	0.0786906	0.061792	0.0243487	0.108949	0.077925	0.0484168	0.0447828	0.0886693	0.0336984	0.0281156	0.0592979	0.0363592	0.0525707	0.0209702	0.0230734	0.0235946	Bacteria	Proteobacteria	Betaproteobacteria	Nitrosomonadales	Nitrosomonadaceae	Nitrosomonas
189	AGTGAACGCTGGCGGCAGGCCTAACACATGCAAGTCGAACGGCAGCACAGAGGAGCTTGCTCCTTGGGTGGCGAGTGGCGGACGGGTGAGGAATACGTCGGAATCTGCCTATTTGTGGGG-GCGCAGATAGATGAGCCGACGTCGGATTAGCTAGTTGGCGGGGTAAAGGCCCACCAAGGCGACGATCCGTAGCTGGTCTGAGAGGATGATCAGCCACACTGGAACTGAGACACGGTCCAG	0.0712396	0.067465	0.188435	0.257491	0.173188	0.262865	0.136975	0.105217	0.0355556	0	0.0183217	0	0.0226296	0.0735159	0.0159566	0.0564207	0.0944287	0.0205973	0	0.0622568	0.0333964	0.0581001	0.0447828	0.0696688	0.0252738	0.0562311	0.0474383	0.0363592	0.0841131	0.0489305	0.0461467	0.0530879	Bacteria	Proteobacteria	Gammaproteobacteria	Xanthomonadales	Xanthomonadaceae	Lysobacter
190	AATCAACGCTGGCGGCGTGCCTAACACATGCAAGTCGAACGCGAAAGGGGCTTCGGCCCTGAGTAGAGTGGCGAACGGGTGAGTAACACGTGGGTGACCTGCCTTCGAGTGGGGGATAAC-GCGCTTGAAGAGGGGCCCGCGTCCGATTAGCTAGTTGGTGGGGTAATGGCCTACCAAGGCGACGATCGGTAGCCGGCCTGAGAGGGCGGACGGCCACACTGGGACTGAGACACGGCCCAG	0.0712396	0.0843313	0.0588859	0.124844	0.0384862	0.0454959	0.00805737	0.0175362	0.302222	0.184911	0.219861	0.125818	0.203666	0.18379	0.135631	0.0789889	0.125905	0.0205973	0.0486973	0.077821	0.0667928	0.1162	0.0671742	0.0760023	0.0673968	0.0562311	0.0355787	0.0848382	0.115656	0.0419404	0.0807568	0.0825813	Bacteria	Acidobacteria	Acidobacteria_Gp6	Acidobacteria_Gp6	Acidobacteria_Gp6	Gp6
191	GACGAACGCTGGCGGCGTGCTTAACACATGCAAGTCGAGGGCGGGGAGGGGCAACTCTTCCCGACCGGCGAACGGGTGCGTAACACGTGAGCGACCTGCCTTCCCGCGGGGGATAGCCGG-GGGCGGGGAGAGGGGCTCGCGGCCTATCAGCTAGTTGGCGGGGTAACGGCCCACCAAGGCGGTGACGGGTAGCTGGTCTGAGAGGATGGCCAGCCACATTGGGACTGAGAGACGGCCCAG	0	0.0168663	0.0117772	0.00780275	0.0128287	0	0	0	0.0977778	0.0739645	0.146574	0.100654	0.0678887	0.0551369	0.103718	0.0677048	0.0944287	0.123584	0.073046	0.140078	0.100189	0.0774668	0.15674	0.120337	0.101095	0.0913756	0.201613	0.181796	0.17874	0.097861	0.0807568	0.100277	Bacteria	Gemmatimonadetes	Gemmatimonadetes	Gemmatimonadales	Gemmatimonadaceae	Gemmatimonas
192	GATGAACGCTGGCGGCGTGCTTAACACATGCAAGTCGAACGATGAAAGCCGGAGCTTGCTCTGGCTGGATTAGTGGCGAACGGGTGAGTAACACGTGAGTAACCTGCCCCAGACTCTGGG-TCGGTCTGGGATGGACTCGCGGCCTATCAGGTAGTTGGTGAGGTAACGGCTCACCAAGCCGACGACGGGTAGCCGGCCTGAGAGGGTGACCGGCCACACTGGGACTGAGACACGGCCCAG	0.101771	0.185529	0.0706631	0.0780275	0.115459	0.116267	0.0402868	0.105217	0.0622222	0.0369822	0.0732869	0.100654	0.0452591	0.018379	0.0638264	0.13541	0.0786906	0.0823893	0	0.077821	0.0222643	0.0774668	0.0335871	0.0696688	0.0758214	0.06326	0.0592979	0.0605987	0.0525707	0.0768908	0.0519151	0.0589866	Bacteria	Actinobacteria	Actinobacteria	Actinomycetales	Microbacteriaceae	Salinibacterium
193	AACGAACGCTGGCGGCATGCCTAACACATGCAAGTCGAACGAAGCCTTCGGGCTTAGTGGCGCACGGGTGCGTAACGCGTGGGAATCTGCCCTCTGGTACGGAATAACTCAGGGAAACTT-TCGCCTGAGGATGAGCCCGCGTCGGATTAGCTAGTTGGTGAGGTAAAAGCTCACCAAGGCGACGATCCGTAGCTGGTCTGAGAGGATGATCAGCCACACTGGGACTGAGACACGGCCCAG	0.0407083	0.0843313	0.0942174	0.0858302	0.0833868	0.111212	0.0644589	0.105217	0.0533333	0.0739645	0.0732869	0.0754907	0.0452591	0.0551369	0.159566	0.0789889	0.204596	0.164779	0.073046	0.0933852	0.111321	0.0968335	0.123153	0.0696688	0.0758214	0.0702889	0.0948767	0.0848382	0.136684	0.0559206	0.0807568	0.0707839	Bacteria	Proteobacteria	Alphaproteobacteria	Sphingomonadales	Sphingomonadaceae	un_Sphingomonadaceae
194	GATGAACGCTGGCGGCGTGCCTAATACATGCAAGTCGAACGGGAGACCTGGTTTCGACCGGGTTGAGAGTGGCGCACGGGTGAGGAACACATGGCTGACCTGCCCTTCAGAGGGGGATAA-GTGCTGAAGGAGGGGGCTGTGGCCCATCAGCTTGTTGGTAGGGTAACGGCCTACCAAGGCGACGACGGGTAGGGGGCCTGAGAGGGTGACCCCCCACACTGGGACTGAGACACGGCCCAG	0.101771	0.118064	0.0588859	0.0702247	0.0320718	0.0808816	0.0644589	0.122753	0.124444	0.129438	0.146574	0.0503271	0.0452591	0.0918949	0.0877613	0.0451365	0.0786906	0.102987	0.073046	0.140078	0.0222643	0.0484168	0.0447828	0.0506682	0.0505476	0.0773178	0.0592979	0.0727185	0.0315424	0.0489305	0.0980618	0.0884799	Bacteria	Chloroflexi	Anaerolineae	Anaerolineales	Anaerolineaceae	un_Anaerolineaceae
195	AACGAACGCTGGCGGCATGCCTAACACATGCAAGTCGAACGAGACCTTCGGGTCTAGTGGCGCACGGGTGCGTAACGCGTGGGAATCTGCCCCTCGGTTCGGAATAACACAGAGAAATTT-TCGCCGAGGGATGAGCCCGCGTAGGATTAGCTTGTTGGTGGGGTAATGGCCCACCAAGGCGACGATCCTTAGCTGGTCTGAGAGGATGATCAGCCACACTGGGACTGAGACACGGCCCAG	0.0305312	0.0168663	0.0588859	0.0156055	0.0577293	0.050551	0.0483442	0.0438404	0	0.0184911	0.0366435	0.0251636	0	0.018379	0.0877613	0.112841	0.125905	0.226571	0.073046	0.0622568	0.166982	0.1162	0.111957	0.158338	0.134794	0.0913756	0.0474383	0.0969579	0.0630848	0.0559206	0.0576834	0.0589866	Bacteria	Proteobacteria	Alphaproteobacteria	Sphingomonadales	Sphingomonadaceae	Novosphingobium
196	ATTGAACGCTGGCGGCATGCTTAACACATGCAAGTCGAACGGCAGCACGGCCGGGTAACCGGTGGGTGGCGAGTGGCGGACGGGTGAGTAATGCGTAGGAATCTGCCTTGTAGTGGGGGA-GCGCTATGAGATGAGCCTACGTCCGATTAGCTAGTTGGTAGGGTAATGGCCTACCAAGGCGACGATCGGTAGCTGGTCTGAGAGGACGATCAGCCACACTGGAACTGAGACACGGTCCAG	0.193365	0.202395	0.223766	0.273096	0.166774	0.343747	0.136975	0.306883	0.0355556	0.0184911	0.0732869	0.0251636	0.0452591	0.0367579	0.0159566	0.0338524	0.0157381	0.0205973	0.073046	0.0155642	0.0333964	0.0484168	0	0.0316676	0.0168492	0.06326	0.0474383	0.048479	0.0105141	0.0699007	0.0634518	0.0589866	Bacteria	Proteobacteria	Gammaproteobacteria	Methylococcales	Methylococcaceae	Methylocaldum
197	AACGAACGCTGGCGGCAGGCTTAACACATGCAAGTCGAACGGTTCCTTCGGGGACAGTGGCAGACGGGTGAGTAACACGTGGGAATCTACCCATCCCTGCGGAACAACTCCGGGAAACTG-TCGGGGATGGATGAGCCCGCGTTGGATTAGCTAGTTGGTGGGGTAAAGGCCTACCAAGGCGACGATCCATAGCTGGTCTGAGAGGATGATCAGCCACATTGGGACTGAGACACGGCCCAA	0.0508854	0	0.0824402	0.0702247	0.0962155	0.0556061	0.112803	0.0876808	0.0622222	0.0924556	0.0366435	0.150981	0.0226296	0.018379	0.111696	0.0789889	0.0472144	0.0823893	0.0486973	0.124514	0.133586	0.0484168	0.0447828	0.114003	0.117944	0.105433	0.142315	0.0727185	0.0210283	0.0838809	0.0576834	0.0707839	Bacteria	Proteobacteria	Alphaproteobacteria	Rhizobiales	Rhizobiaceae	Rhizobium
198	ATTGAACGCTGGCGGCATGCTTTACACATGCAAGTCGAGCGGCAGCGCGGGACTCGGGCAACTGAGCCCTGGCGGCGAGCGGCGAACGGGTGAGTAACACATCGGAACGTATCCCGTAGA-ACGCTATGGGAGCGGCCGATGTCCGATTAGCTAGTTGGTGGGGTAAAGGCCTACCAAGGCGACGATCGGTAGCTGGTCTGAGAGGATGATCAGCCACACTGGGACTGAGACACGGCCCAG	0.0101771	0.0337325	0.0353315	0.00780275	0.0320718	0.0101102	0.0241721	0	0.195556	0.110947	0.183217	0.100654	0.226296	0.0551369	0.111696	0.0564207	0.204596	0.061792	0.146092	0.0622568	0.111321	0.0484168	0.0671742	0.0633352	0.101095	0.105433	0.130455	0.0727185	0.0525707	0.132811	0.0461467	0.0766826	Bacteria	Proteobacteria	Betaproteobacteria	un_Betaproteobacteria	un_Betaproteobacteria	un_Betaproteobacteria
199	ATTGAACGCTGGCGGCGTGCCTAACACATGCAAGTCGAGCGGCAGCGCGGGGGCAACCCTGGCGGCGAGCGGCGGACGGGTGAGTAACGCTTGGGAATCTGCCTGTTAGTGGGGGACAAC-GCGCTAACAGATGAGCCCAAGTCGGATTAGCTAGTTGGTAGGGTAAAGGCCTACCAAGGCGACGATCCGTAACTGGTCTGAGAGGACGACCAGTCACACCGGAACTGAGACACGGTCCGG	0.111948	0.252994	0.235544	0.109238	0.10263	0.0758265	0.0402868	0.0701447	0.168889	0.147929	0.10993	0.226472	0.248925	0.128653	0.0398915	0.0789889	0.0944287	0.102987	0.0486973	0.077821	0.0222643	0.0290501	0.0671742	0.0506682	0.0252738	0.0351444	0.0237192	0.0848382	0.073599	0.0209702	0.0346101	0.0648853	Bacteria	Proteobacteria	Gammaproteobacteria	Xanthomonadales	Sinobacteraceae	Steroidobacter
200	ATTGAACGCTGGCGGCGTGCCTAACACATGCAAGTCGAGCGGTAACAGGTGTAGCAATACATGCTGACGAGCGGCGGACGGGTGAGTAACGCTTGGGAATCTGCCTGTTAGTGGGGGACA-GCGCTAACAGATGAGCCCAAGTCGGATTAGCTAGTTGGTAGGGTAACGGCCTACCAAGGCGACGATCCGTAACTGGTCTGAGAGGACGACCAGTCACACCGGAACTGAGACACGGTCCGG	0.101771	0.101198	0.117772	0.101436	0.121873	0.166818	0.177262	0.245506	0.0977778	0.0739645	0.0732869	0.150981	0.0905182	0.0735159	0.079783	0.13541	0.0944287	0.102987	0.146092	0.077821	0.122454	0.125884	0.145544	0.0696688	0.0673968	0.105433	0.118596	0.133317	0.0946273	0.0279603	0.0980618	0.0707839	Bacteria	Proteobacteria	Gammaproteobacteria	Xanthomonadales	Sinobacteraceae	Steroidobacter
201	GATAAACGCTGGCGGCGTGCTTCAGGCATGCAAGTCGAACGGACCTTCGGGTCAGTGGCGGACGGGTGAGTAACACGTGAGCAACCTGCCCAGAAGTGGGGAATAACTTGCCGAAAGGTG-TCGCTTCTGGAGGGGCTTGCGGTCGATTAGCTAGTTGGTGGGGTAATGGCCTACCAAGGCGACGATCGATAGCTGGTCTGAGAGGACGGTCAGCCACACGGGGACTGAGATACGGCCCCG	0.0508854	0.101198	0.188435	0.101436	0.256575	0.161763	0.193377	0.333187	0.00888889	0	0	0	0	0	0.0319132	0.0564207	0.0157381	0.0411946	0	0.0466926	0	0.00968335	0.0447828	0.012667	0	0.0281156	0.0948767	0.0969579	0.0420566	0.0489305	0.0346101	0.035392	Bacteria	Chloroflexi	un_Chloroflexi	un_Chloroflexi	un_Chloroflexi	un_Chloroflexi
202	GATGAACGCTAGCGGCAGGCCTAACACATGCAAGTCGAGGGGTAGAGGGAGCTTGCTTCCTTGAGACCGGCGCACGGGTGCGTAACGCGTATGCAATCTGCCCCCTACAGGGGAATAGCC-TCGGTAGGGGATGAGCATGCGTACCATTAGCTAGTTGGTGTGGTAACGGCACACCAAGGCAACGATGGTTAGGGGCCCTGAGAGGGGGATCCCCCACACTGGTACTGAGACACGGACCAG	0.0305312	0.101198	0.0942174	0.101436	0.0705581	0.0657163	0.0322295	0.0789128	0.0355556	0.0924556	0	0.100654	0	0.0918949	0.0957396	0.0338524	0.0629525	0.144181	0.0243487	0.108949	0.0556607	0.0774668	0.100761	0.101336	0.143218	0.105433	0.0355787	0.0605987	0.0315424	0.0838809	0.0576834	0.100277	Bacteria	Bacteroidetes	Flavobacteria	Flavobacteriales	Flavobacteriaceae	Aequorivita
203	ATTGAACGCTGGCGGCATGCCTTACACATGCAAGTCGAACGGTAACAGGGGCTTCGGCCCGCTGACGAGTGGCGGACGGGTGAGTAATGCATCGGAATGTACCCAGTAGTGGGGGATAGC-GCGCTATTGGAGCAGCCGATGTCAGATTAGCTAGTTGGTGGGGTAAAGGCCTACCAAGGCAACGATCTGTAACTGGTCTGAGAGGACGACCAGTCACACTGGGACTGAGACACGGCCCAG	0.346021	0.371058	0.105995	0.0702247	0.0898012	0.0960469	0.0241721	0.0789128	0.0355556	0.0739645	0.0732869	0.100654	0.0226296	0.0735159	0.0478698	0.0564207	0.0786906	0.0205973	0.0243487	0.0622568	0.0556607	0.0581001	0.0223914	0.0253341	0.042123	0.0421733	0.0711575	0.0121197	0.0315424	0.0699007	0.0288417	0.0294933	Bacteria	Proteobacteria	Betaproteobacteria	Burkholderiales	un_Burkholderiales	un_Burkholderiales
204	AACGAACGCTGGCGGCATGCCTAACACATGCAAGTCGAACGTGAAGCCGGGGCTTGCTCCGGTGGAAAGTGGCGCACGGGTGAGTAACGCGTGGGTAACGTACCTATTGGTTGGGGATAA-TCGCCGATAGATCGGCCCGCGTCCCATCAGCTTGTTGGTGAGGTAACGGCTCACCAAGGCTACGACGGGTAGCTGGTCTGAGAGGATGATCAGCCACACTGGGACTGAGACACGGCCCAG	0.0305312	0.0337325	0.176658	0.124844	0.20526	0.202204	0.128918	0.192898	0	0	0.0183217	0.0251636	0	0	0.0478698	0.0338524	0.0786906	0.0205973	0.0243487	0.0466926	0.0556607	0.0290501	0.0559785	0.0633352	0.0505476	0.06326	0.0474383	0.0121197	0.0105141	0.0699007	0.0576834	0.0471893	Bacteria	Proteobacteria	Deltaproteobacteria	Myxococcales	Cystobacteraceae	Anaeromyxobacter
205	GACGAACGCTGGCGGCGTGCTTAACACATGCAAGTCACGGGGGTCCCGGGGGCAACCTTGGGATAACCGGCGAACGGGTGCGTAACACGTGACCAACCTGCCCTCGTGTGGGGGATAGCC-GCGCGCGGGGAGGGGGTCGCGGCCTATCAGCTGGTTGGCGGGGTAACGGCCCACCAAGGCGACGACGGGTAGCTGGTCTGAGAGGATGGCCAGCCACATTGGGACTGAGAGACGGCCCAG	0	0	0.0235544	0.0156055	0.0256575	0	0.0161147	0.00876808	0.0444444	0.0184911	0.201539	0.0251636	0	0.018379	0.119674	0.0564207	0.0944287	0.164779	0.121743	0.171206	0.133586	0.125884	0.111957	0.0950029	0.0673968	0.0562311	0.166034	0.109078	0.262854	0.118831	0.109599	0.141568	Bacteria	Gemmatimonadetes	Gemmatimonadetes	Gemmatimonadales	Gemmatimonadaceae	Gemmatimonas
206	GATGAACGCTAGCGGCAGGCTTAATACATGCAAGTCGTGGGGCAGCAGGTCCCGAGCAATCGGGATGCTGGCGACCGGCAAACGGGTGAGGAACACGTACACAACCTTCCTTCAAGTGGG-GCGCTTGAAGACGGGTGTGCGCCTGATTAGGTAGTTGGCGGGGTAACGGCCCACCAAGCCTACGATCAGTAACTGGTGTGAGAGCACGACCAGTCACACGGGCACTGAGACACGGGCCCG	0	0.0168663	0.0471087	0.0234082	0.109044	0.0303306	0.15309	0.0350723	0.00888889	0	0.0366435	0	0	0	0.119674	0.124125	0.0629525	0.0411946	0.0243487	0.0466926	0.278303	0.0871502	0.100761	0.0443347	0.0505476	0.0351444	0.189753	0.169676	0.199769	0.0489305	0.0634518	0.0825813	Bacteria	Bacteroidetes	Sphingobacteria	Sphingobacteriales	Chitinophagaceae	Terrimonas
207	AATCAACGCTGGCGGCGTGCCTAACACATGCAAGTCGTACGCGAAAGGGGCTTCGGCCCTGAGTAGAGTGGCAAACGGGTGAGTAACACGTGGGTGACCTGCCTTCGAGTGGGGGATAAC-GCGCTTGAAGAGGGGCCCGCGCCTGATTAGCTAGTTGGTGGGGTAACGGCCTACCAAGGCGACGATCAGTATCCGGCCTGAGAGGGCGGACGGACACACTGGGACTGAGACACGGCCCAG	0.0305312	0.0337325	0.0588859	0.0234082	0.0641437	0.0454959	0.0402868	0.0526085	0.00888889	0.0554734	0	0.0503271	0	0	0.0079783	0.0564207	0.110167	0.0205973	0.0486973	0.0155642	0.0667928	0.0387334	0.0895656	0.0823358	0.101095	0.0913756	0.166034	0.109078	0.157712	0.0838809	0.149977	0.112075	Bacteria	Acidobacteria	Acidobacteria_Gp6	Acidobacteria_Gp6	Acidobacteria_Gp6	Gp6
208	GATGAACGCTAGCGGCAGGCCTAATACATGCAAGTCGTACGGCAGCGCGGGCAGCAATGCCCGGCGGCGAGTGGCGGATGGGTGCGTAACGCGTATGCAACCTGCCCCTTACAGGGGGAT-CCGGTAAGGGATGGGCATGCGTGCCATTAGCTTGTTGGCGGTGTAACGGACCACCAAGGCTACGATGGCTAGGGGGTCTGAGAGGATGGTCCCCCACACTGGCACTGAGATACGGGCCAG	0.478323	0.320459	0.0706631	0.117041	0.0898012	0.0252755	0.0241721	0.0438404	0.346667	0.258876	0.311469	0.327126	0.271555	0.275685	0.183501	0.203114	0.220334	0.288363	0.292184	0.264591	0.133586	0.0581001	0.134348	0.145671	0.126369	0.182751	0.118596	0.0242395	0.0315424	0.0768908	0.0576834	0.0766826	Bacteria	Bacteroidetes	Sphingobacteria	Sphingobacteriales	Flammeovirgaceae	un_Flammeovirgaceae
209	GACGAACGCTGGCGGCGGGCTTAACACATGCAAGTCGTACGCGAACGGGTCCTTCGGGACCCTAGTAGAGTGGCGCACGGGTGCGTAACACGTGGGCAACCTACCCTTGAGTGCGGAATA-GCGCTCAAGGATGGGCCTGCGGCGGATTAGGTAGTTGGTGAGGTAATGGCTCACCAAGCCGATGATCCGTAGCTGGTCTGAGAGGATGATCAGCCACACTGGCACTGAGACACGGGCCAG	0.0203542	0.067465	0.0117772	0.132647	0.0641437	0.0606612	0.112803	0.131521	0.0622222	0.0554734	0.0916086	0.0251636	0.0452591	0.0735159	0.0478698	0.0902731	0.0786906	0.0411946	0.0973947	0.155642	0.100189	0.0774668	0.0783699	0.139338	0.0505476	0.0281156	0.0592979	0.0605987	0.0946273	0.097861	0.0865251	0.0766826	Bacteria	Bacteroidetes	Sphingobacteria	Sphingobacteriales	Rhodothermaceae	un_Rhodothermaceae
210	ATTGAACGCTGGCGGCATGCCTAACACATGCAAGTCGAACGGTAACAGGCCGAGAGATCCTTCGGGTGATCTTGGTGCTGACGAGTGGCGAACGGGTGAGTAACGCGTAGGAATCTGCCC-GCGCTATTGGATGAGCCTACGTCGGATTAGCTTGTTGGTGGGGTAATGGCCTACCAAGGCGACGATCCGTAGCTGGTCTGAGAGGACGATCAGCCACACTGGGACTGAGACACGGCCCAG	0.193365	0.118064	0.0942174	0.0858302	0.134702	0.136488	0.0725163	0.0526085	0.0977778	0.0739645	0.0732869	0.100654	0.0226296	0.0735159	0.0398915	0	0.0629525	0.0205973	0.0486973	0.0311284	0.0111321	0.0484168	0.0559785	0.012667	0.0252738	0.0702889	0.0592979	0.0242395	0.0525707	0.0489305	0.0403784	0.0294933	Bacteria	Proteobacteria	Gammaproteobacteria	un_Gammaproteobacteria	un_Gammaproteobacteria	un_Gammaproteobacteria
211	ATTGAACGCTGGCGGCGTGCTTAACACATGCAAGTCGAGCGGTAACGCGGGGGCAACCCTGGCGACGAGCGGCGAACGGGTGAGTAATGCTTCGGAATCTTCCCATTGGTGGGGAATAAC-GCGCCATTGGATGAGCCGAAGTCGGATTAGCTAGTTGGTGGGGTAATGGCCCACCAAGGCGACGATCCGTAGCTGGTCTGAGAGGACGACCAGCCACACTGGGACTGAGACACGGCCCAG	0.0305312	0.067465	0.0942174	0.0390137	0.141116	0.171873	0.112803	0.0876808	0.0177778	0.0739645	0.0183217	0.0251636	0	0.0367579	0.0638264	0.0338524	0.0314762	0	0	0.0311284	0.0333964	0.0484168	0.0671742	0.0570017	0.0168492	0.0421733	0.130455	0.0848382	0.0525707	0.0699007	0.0346101	0.0648853	Bacteria	Proteobacteria	un_Proteobacteria	un_Proteobacteria	un_Proteobacteria	un_Proteobacteria
212	GACGAACGCTGGCGGCGTGCTTAACACATGCAAGTCACGGGGGCCTGGGCAACCAGGCAACCGGCGAACGGGTGCGTAACACGTGACCAACCTGCCCTCGTGTGGGGGATAGCCGGGCTA-GCGCACGGGGAGGGGGTCGCGGCCTATCAGCTTGTTGGCGGGGTAACGGCCCACCAAGGCGACGACGGGTAGCTGGTCTGAGAGGATGGCCAGCCACATTGGGACTGAGAGACGGCCCAG	0	0.0168663	0.0117772	0	0.0192431	0.0050551	0.0161147	0.0263043	0.0622222	0.0739645	0.0916086	0.0251636	0.0452591	0	0.0957396	0.0902731	0.125905	0.061792	0.170441	0.0466926	0.144718	0.0968335	0.134348	0.120337	0.0589722	0.0421733	0.118596	0.109078	0.136684	0.090871	0.0807568	0.106176	Bacteria	Gemmatimonadetes	Gemmatimonadetes	Gemmatimonadales	Gemmatimonadaceae	Gemmatimonas
213	GACAAACGCTGGCGGCGTGCATAAAACATGCAAGTCGAACGGATCTCAGCCCGCAAGGGCTGAGGTGAGTGGCGAACGGCTGAGTAACACGTAGGTGACCTGCCCTGAAGTGGGGGACAA-ACGCTTTAGGAGGGGCCTGCGGCCGATTAGCTAGTTGGTGGGGTAATGGCCTACCAAGGCCGCGATCGGTAGTTGGTCTGAGAGGATGACCAGCCAGACTGGGACTGAGACACGGCCCAG	0	0.0168663	0.0588859	0.0546192	0.0449006	0.0303306	0.0805737	0.0175362	0.0533333	0.0369822	0.0916086	0.0251636	0.0452591	0.128653	0.0558481	0.0112841	0.0629525	0.0823893	0.073046	0.0933852	0.133586	0.0774668	0.0783699	0.10767	0.0505476	0.0702889	0.0830171	0.0848382	0.115656	0.104851	0.0692201	0.0471893	Bacteria	un_Bacteria	un_Bacteria	un_Bacteria	un_Bacteria	un_Bacteria
214	GACGAACGCTGGCGGCGTGCTTAACACATGCAAGTCGAACGATGATCCGGGTGCTTGCACTTGGGGATTAGTGGCGAACGGGTGAGTAACACGTGAGTAACCTGCCCTGGACTCTGGGAT-TCGGTTTGGGATGGACTCGCGGCCTATCAGCTTGTTGGTGAGGTAATGGCTCACCAAGGCGTCGACGGGTAGCCGGCCTGAGAGGGTGACCGGCCACACTGGGACTGAGACACGGCCCAG	0	0.101198	0.0353315	0.0390137	0.0449006	0.0707714	0.0241721	0.0701447	0.0266667	0.0184911	0	0.0251636	0.0226296	0.0367579	0.0558481	0.124125	0.0314762	0.164779	0.0486973	0.140078	0.100189	0.0581001	0.0335871	0.10767	0.0926706	0.119491	0.0948767	0.121197	0.0315424	0.0838809	0.0922935	0.112075	Bacteria	Actinobacteria	Actinobacteria	Actinomycetales	Microbacteriaceae	Agromyces
215	AACGAACGTTAGCGGCACGCTTAACACATGCAAGTCGAGCGAGAATCCCTTCGGGGAGGACAGCGGCGCACGGGTGAGTAACACGTAGATAATCTACCCCCGAGTGGTGGATAACGTTCC-GCGCTTGGGGATGAGTCTGCGGCCCATCAGTTAGTTGGTAGTGTAAAGGACTACCAAGGCTAAGACGGGTAGCTGGTCTGAGAGGATGAACAGCCACACTGGAACTGAGACACGGTCCAG	0.0101771	0	0.0706631	0.0468165	0.128287	0.181984	0.15309	0.587462	0	0	0	0	0	0	0	0	0	0	0	0	0.0111321	0.00968335	0.0559785	0.012667	0.0084246	0.00702889	0.0474383	0.048479	0.0315424	0.0699007	0.0634518	0.0471893	Bacteria	Proteobacteria	Deltaproteobacteria	Myxococcales	un_Myxococcales	un_Myxococcales
216	AACGAACGTTAGCGGCGCGCTTAACACATGCAAGTCGAGCGAGAAAGGGCTTCGGCCCCGGTAAAGCGGCGCACGGGTGAGTAACACGTGGGTAATCTGCCCTCGAGTGGTGGATAACTC-GCGCTTGAGGATGAGCCTGCGGCCCATCAGCTTGTTGGTGGTGTAAAAGACCACCAAGGCGAAGACGGGTAGCTGGTCTGAGAGGATGAACAGCCACACTGGAACTGAGACACGGTCCAG	0.31549	0.303593	0.259098	0.31211	0.224503	0.212314	0.15309	0.22797	0.0444444	0.0554734	0.10993	0.100654	0.0678887	0.0735159	0.079783	0.0338524	0.0314762	0.0411946	0.0243487	0.0622568	0.0556607	0.0968335	0.0559785	0.0633352	0.0589722	0.0913756	0.0237192	0.0727185	0.0210283	0.104851	0.0865251	0.0294933	Bacteria	Proteobacteria	Deltaproteobacteria	Myxococcales	Polyangiaceae	un_Polyangiaceae
217	AACGAACGCTGGCGGCATGCCTAACACATGCAAGTCGAACGAGACCTTCGGGTCTAGTGGCGCACGGGTGCGTAACGCGTGGGAATCTGCCCTCTGGTACGGAATAACTCAGGGAAACTT-TCGCCTGAGGATGAGCCCGCGTCGGATTAGCTAGTTGGTGAGGTAAAAGCTCACCAAGGCGACGATCCGTAGCTGGTCTGAGAGGATGATCAGCCACACTGGGACTGAGACACGGCCCAG	0.0305312	0.0168663	0.0824402	0.0546192	0.0641437	0.0808816	0.0322295	0.0526085	0.0533333	0.0924556	0.0732869	0.125818	0	0.018379	0.111696	0.112841	0.0629525	0.0411946	0.0973947	0.077821	0.0890571	0.0774668	0.0895656	0.101336	0.0673968	0.0702889	0.0711575	0.121197	0.105141	0.0629107	0.0634518	0.0707839	Bacteria	Proteobacteria	Alphaproteobacteria	Sphingomonadales	Sphingomonadaceae	un_Sphingomonadaceae
218	GACGAACGCTGGCGGCGTGCTTAACACATGCAAGTCGAACGGTGAAACAGGAGCTTGCTCCTGCGGATCAGTGGCGAACGGGTGAGTAACACGTGAGTAACCTGCCCCAGACTCTGGGAT-TCGGTCTGGGATGGACTCGCGGCCTATCAGCTTGTTGGTGAGGTAACGGCTCACCAAGGCGACGACGGGTAGCCGGCCTGAGAGGGCGACCGGCCACACTGGGACTGAGACACGGCCCAG	0.162833	0.101198	0.0588859	0.109238	0.0641437	0.141543	0.0644589	0.157826	0.0444444	0.0739645	0.10993	0.125818	0.135777	0.18379	0.0558481	0.0451365	0.0629525	0.0205973	0.0973947	0.140078	0.111321	0.125884	0.0223914	0.0633352	0.042123	0.147607	0.0592979	0.0242395	0.0630848	0.090871	0.132672	0.0707839	Bacteria	Actinobacteria	Actinobacteria	Actinomycetales	Intrasporangiaceae	Phycicoccus
219	AATCAACGCTGGCGGCGTGCCTAACACATGCAAGTCGAACGCGAAAGGGGCTTCGGCCCTGAGTAGAGTGGCGAACGGGTGAGTAACACGTGGGTGACCTACCTTCGAGTGGGGGATAAC-GCGCTTGGAGAGGGGCCCGCGCCTGATTAGCTAGTTGGCGGGGTAATGGCCCACCAAGGCGACGATCAGTAGCCGGCCTGAGAGGGCGGACGGCCACACTGGGACTGAGACACGGCCCAG	0.0305312	0	0.0353315	0.062422	0.0641437	0.106157	0.0644589	0.0263043	0.0177778	0	0	0	0	0	0.079783	0.0338524	0.0314762	0.061792	0.0243487	0.0311284	0.144718	0.0968335	0.100761	0.114003	0.0926706	0.12652	0.177894	0.242395	0.294396	0.111841	0.167282	0.171061	Bacteria	Acidobacteria	Acidobacteria_Gp6	Acidobacteria_Gp6	Acidobacteria_Gp6	Gp6
220	GATGAACGCTGGCGGCGTGCCTAACACATGCAAGTCGAACGGACCCTTCGGGGTTAGTGGCGCACGGGTGAGGAACACGTAGCTTACCTGCCCTTTACACTGAGATAACTCTGCGAAAGC-GCGGTAAAGGAGGGGGCTGCGGCCCATCAGCTAGTTGGTGAGGTAACGGCTCACCAAGGCGACGACGGGTAGGGGACCTGAGAGGGTGACCCCCCACACTGGGACTGAGACACGGCCCAG	0.0101771	0.0337325	0.0235544	0.031211	0.0641437	0.0606612	0.193377	0.201666	0	0	0.0183217	0	0	0	0.0638264	0.0338524	0.0314762	0.0205973	0	0	0.0222643	0.00968335	0.0447828	0.0506682	0.0336984	0.0140578	0.0592979	0.145437	0.0841131	0.125821	0.109599	0.159264	Bacteria	un_Bacteria	un_Bacteria	un_Bacteria	un_Bacteria	un_Bacteria
221	AGCGAACGCTGGCGGCAGGCCTAACACATGCAAGTCGAGCGCCCCGCAAGGGGAGCGGCAGACGGGAGAGTAACACGTGGGAACGTACCCTTTGGTTCGGAACAACCCAGGGAAACTTGG-TCGCCGAAGGATCGGCCCGCGTCTGATTAGCTAGTTGGTGAGGTAACGGCTCACCAAGGCGACGATCAGTAGCTGGTCTGAGAGGATGATCAGCCTCACTGGGACTGAGACACGGCCCAG	0.0610625	0.0505988	0.129549	0.0780275	0.0577293	0.050551	0.0966884	0.113985	0.0711111	0.0924556	0.0549652	0.125818	0.158407	0.110274	0.0558481	0.101557	0.0472144	0.0411946	0.0486973	0.0622568	0	0.0387334	0.0111957	0.0190006	0.042123	0.0492022	0.0118596	0.0121197	0.0210283	0.0838809	0.0692201	0.0648853	Bacteria	Proteobacteria	Alphaproteobacteria	Rhizobiales	un_Rhizobiales	un_Rhizobiales
222	ATTGAACGCTGGCGGCATGCCTTACACATGCAAGTCGAACGGTAACGCGGGCTTCGGCCTGGCGACGAGTGGCGAACGGGTGAGTAATACATCGGAACGTGCCCAGGAGTGGGGGATAGC-GCGCTCATGGAGCGGCCGATGTCGGATTAGCTAGTTGGTGGGGTAAGAGCCTACCAAGGCGACGATCCGTAGCTGGTCTGAGAGGATGATCAGCCACACTGGGACTGAGACACGGCCCAG	0.0407083	0.067465	0.0235544	0	0.0192431	0.0303306	0.0161147	0.0350723	0.0711111	0.147929	0.0916086	0.0503271	0.0452591	0.0735159	0.0718047	0.0677048	0.0629525	0.144181	0.073046	0.0466926	0.0890571	0.0484168	0.111957	0.0570017	0.0505476	0.0702889	0.118596	0.0605987	0.0630848	0.0838809	0.0980618	0.129771	Bacteria	Proteobacteria	Betaproteobacteria	un_Betaproteobacteria	un_Betaproteobacteria	un_Betaproteobacteria
223	AACGAACGCTGGCGGCGTGGATTAGGCATGCAAGTCGTGCGCGAAAGGGTCCTTCGGGGCCTGAGTAGAGCGGCGAACTGGTGAGTACAAGGTGACTAACGTGCCCTCGGGTGGGGGATA-GCGCGCGAGGATCGGGTCACCTCCCATTAGGTAGTTGGTGCGGTAACGGCGCACCAAGCCTGCGATGGGTAGCTGGACTGAGAGGTTGGCCAGCCACACTGGGACTGAGATACGGCCCAG	0.152656	0.13493	0.0588859	0.109238	0.0641437	0.0404408	0.0564016	0.0964489	0.0977778	0	0.146574	0.100654	0.0452591	0.0367579	0.0478698	0.0789889	0.0472144	0.0411946	0.0973947	0.0622568	0.0111321	0.0677835	0.0111957	0.0633352	0.0168492	0.0702889	0.0711575	0.0363592	0.0105141	0.0629107	0.0634518	0.0707839	Bacteria	un_Bacteria	un_Bacteria	un_Bacteria	un_Bacteria	un_Bacteria
224	AACGAACGCTGGCGGCATGCCTAACACATGCAAGTCGAACGAGACCTTCGGGTCTAGTGGCGCACGGGTGCGTAACGCGTGGGAATCTGCCCTTGGGTTCGGGATAACAGTTGGAAACGA-TCGCCCAGGGATGAGCCCGCGTCGGATTAGCTAGTTGGTGAGGTAAAAGCTCACCAAGGCGACGATCCGTAGCTGGTCTGAGAGGATGATCAGCCACACTGGGACTGAGACACGGCCCAG	0.0610625	0.0505988	0.117772	0.124844	0.166774	0.106157	0.104746	0.122753	0.168889	0.0369822	0.164896	0.0754907	0.0905182	0.110274	0.175523	0.157978	0.141643	0.102987	0.146092	0.155642	0.267171	0.164617	0.167936	0.158338	0.143218	0.0773178	0.130455	0.181796	0.189255	0.118831	0.13844	0.165163	Bacteria	Proteobacteria	Alphaproteobacteria	Sphingomonadales	Sphingomonadaceae	Sphingomonas
225	AACGAACGTTAGCGGCGCGCTTAACACATGCAAGTCGTACGGGACTGGGGGCAACTCCAGTTCAGTGGCGCACGGGTGAGTAACACGTAGGTAATCTCCCCTCGAGTGGTGGATAACCTT-GCGCTCGAGGATGAGCCTGCGGCCCATCAGGTAGTTGGTGGGGTAATGGCCTACCAAGCCTAAGACGGGTAGCTGGTCTGAGAGGATGGTCAGCCACACTGGAACTGAGACACGGTCCAG	0.0712396	0.067465	0.0706631	0.117041	0.0705581	0.0353857	0.0564016	0.0438404	0.08	0.0739645	0.0549652	0.0754907	0.0452591	0.0367579	0.079783	0.0338524	0.0786906	0	0.0243487	0.0311284	0.0333964	0.106517	0.0111957	0.0443347	0.0252738	0.0492022	0.0830171	0.0727185	0.0105141	0.0699007	0.0980618	0.0530879	Bacteria	Proteobacteria	Deltaproteobacteria	Myxococcales	Polyangiaceae	Byssovorax
226	GACGAACGCTGGCGGCGTGCCTAATGCATGCAAGTCGAGCGACGCATACTGGAGGGGTAACCCACCGGTATGACGGAGCGGCGAACGGGTGAGTAACACGTGAGCAACCTGCCCCGAAGA-GCGCTTCGGGATGGGCTCGCGGCCTATCAGCTTGTTGGTGGGGTAACGGCCTACCAAGGCTTCGACGGGTAGCTGGTCTGAGAGGACGATCAGCCACACTGGGACTGAGACACGGCCCAG	0	0	0.0117772	0.0390137	0.0320718	0.0353857	0.0241721	0.0350723	0.106667	0.0369822	0.128252	0.125818	0.158407	0.018379	0.111696	0.124125	0.0944287	0.164779	0	0.0933852	0.077925	0.106517	0.0559785	0.0950029	0.117944	0.0843467	0.130455	0.0727185	0.0420566	0.0768908	0.0692201	0.0471893	Bacteria	Actinobacteria	Actinobacteria	Acidimicrobiales	un_Acidimicrobiales	un_Acidimicrobiales
227	GATGAACGCTAGCGGCAGGCCTAACACATGCAAGTCGAGGGGTAACGGGGTGCTTGCACCGCCGACGACCGGCGCACGGGTGAGCAACGCGTATAGAACCTACCCGTTACAGGGGGATAG-TCGGTAACGGATGGCTATGCGTCCCATTAGCTAGTTGGCAGGGTAACGGCCTACCAAGGCAGCGATGGGTAGGGGCCCTGAGAGGGGGATCCCCCACACTGGTACTGAGACACGGACCAG	0.122125	0.067465	0.0471087	0.031211	0.0192431	0.0202204	0.00805737	0.0175362	0.0977778	0.110947	0.0549652	0.0503271	0.0452591	0.0735159	0.0638264	0.0451365	0.0472144	0.061792	0.121743	0.0466926	0.0890571	0.0968335	0.0559785	0.0633352	0.0673968	0.0773178	0.0711575	0.0605987	0.0841131	0.0489305	0.0403784	0.0589866	Bacteria	Bacteroidetes	Flavobacteria	Flavobacteriales	Flavobacteriaceae	Arenibacter
228	GATGAACGCTAGCGACAGGCTTAACACATGCAAGTCGAGGGGTAACAGGGTAGCAATACCGCTGACGACCGGCGCACGGGTGAGTAACGCGTATGCAACCTGCCTATAACTGGGGAATAG-CAGGTTATAGATGGGCATGCGTGACATTAGCTAGTTGGTGAGGTAACGGCTCACCAAGGCTACGATGTCTAGGGGTTCTGAGAGGAAGGTCCCCCACACTGGTACTGAGACACGGACCAG	0	0	0	0	0.0192431	0	0	0	0.346667	0.16642	0.366435	0.125818	0.271555	0.220548	0.0718047	0.0789889	0.0786906	0.0411946	0.0243487	0.0466926	0.0556607	0.0484168	0.0335871	0.0253341	0.0336984	0.06326	0.0118596	0.0121197	0.0105141	0.0489305	0.0461467	0.017696	Bacteria	Bacteroidetes	Bacteroidia	Bacteroidales	Marinilabiaceae	Alkaliflexus
229	GATTAACGCTAGCGGGAGGCCTAATACATGCAAGGCGAGGGTGAATACTTTCGGGTATGAAACCGCCGTACGGGTGCGTAACGCGTATGCAACCTACCCATCACAGGGGGACAGCCCATG-TCGGTGATGGATGGGCATGCGTCTGATTAGCTAGTTGGTAGGGTAACGGCCTACCAAGGCGACGATCAGTAGGGGAGCTGAGAGGTTTTTCCCCCACACGGGCACTGAGACACGGGCCCG	0.0305312	0.067465	0.0117772	0.00780275	0.0320718	0	0	0	0.346667	0.33284	0.183217	0.301963	0.203666	0.385958	0.135631	0.101557	0.0944287	0.164779	0.146092	0.202335	0.133586	0.1162	0.0559785	0.10767	0.143218	0.0843467	0.0474383	0.0242395	0.073599	0.0209702	0.0634518	0.112075	Bacteria	Bacteroidetes	Sphingobacteria	Sphingobacteriales	Cytophagaceae	un_Cytophagaceae
230	ATTGAACGCTGGCGGCATGCCTTACACATGCAAGTCGAACGGCAGCACGGGGGCAACCCTGGTGGCGAGTGGCGAACGGGTGAGTAATGCATCGGAACGTACCTGGTAGTGGGGGATAGC-GCGCTATCGGAGCGGCCGATGTCGGATTAGCTTGTTGGTGGGGTAATGGCTCACCAAGGCTACGATCCGTAACTGGTCTGAGAGGACGACCAGTCACACTGGGACTGAGACACGGCCCAG	0.203542	0.185529	0.0824402	0.195069	0.0769724	0.151653	0.0483442	0.122753	0.0355556	0.0184911	0.0916086	0.0503271	0.0226296	0.0735159	0.0478698	0	0	0.0411946	0.0243487	0.0155642	0.0333964	0.0290501	0.0335871	0.0190006	0.0336984	0.0281156	0.0355787	0.0363592	0.0105141	0.0279603	0.0519151	0.0412906	Bacteria	Proteobacteria	Betaproteobacteria	Burkholderiales	un_Burkholderiales	un_Burkholderiales
231	AATCAACGCTGGCGGCGTGCCTCAGACATGCAAGTCGAACGCGAAAGTCCCCTTCGGGGGACAAGTAGAGTGGCGCACGGGTGAGTAACACGTAGGTAATCTACCTTCGGATGGGGAATA-GCGTCTGAAGAGGAGCCTGCGGCGGATTAGCTAGTTGGTAAGGTAACGGCTTACCAAGGCCACGATCCGTAGCCGGCCTGAGAGGGCGGTCGGCCACACTGACACTGACATACGGGTCAG	0.0203542	0.0168663	0.0117772	0.0156055	0.0577293	0.0151653	0.0483442	0.0175362	0.204444	0.0739645	0.10993	0.150981	0.0678887	0.0367579	0.127653	0.112841	0.125905	0.0411946	0.073046	0.0466926	0.144718	0.0968335	0.0559785	0.114003	0.0926706	0.0562311	0.142315	0.0727185	0.073599	0.0768908	0.0980618	0.0648853	Bacteria	Acidobacteria	Acidobacteria_Gp4	Acidobacteria_Gp4	Acidobacteria_Gp4	Gp4
232	GACGAACGCTGGCGGCGTGCTTAACACATGCAAGTCGAACGGTGAACCCGCTTCGGTGGGGGATCAGTGGCGAACGGGTGAGTAACACGTGGGCAACCTGCCCCCGGCTCTGGGATAACT-TCGGCTGGGGATGGGCCCGCGGCCTATCAGCTTGTTGGTGGGGTAGTGGCCTACCAAGGCGACGACGGGTAGCCGGCCTGAGAGGGTGACCGGCCACACTGGGACTGAGACACGGCCCAG	0.162833	0.13493	0.176658	0.140449	0.0577293	0.146598	0.0725163	0.105217	0.0355556	0.0739645	0.10993	0.0503271	0.0452591	0.110274	0.0398915	0.0451365	0.0629525	0.0205973	0.0973947	0.0466926	0.0556607	0.0484168	0.0111957	0.0506682	0.0252738	0.0702889	0.0830171	0.0727185	0.0105141	0.0768908	0.109599	0.100277	Bacteria	Actinobacteria	Actinobacteria	Actinomycetales	Geodermatophilaceae	Blastococcus
233	AACGAACGCTGGCGGCAGGCCTAACACATGCAAGTCGAACGAGAAGCCACCTTCGGGTGGTGGAAAGTGGCAGACGGGTGAGTAACACGTGGGAACGTGCCCTTTGGTTCGGAACAACTC-TCGCCGAAGGATCGGCCCGCGTCTGATTAGCTTGTTGGTGAGGTAATGGCTCACCAAGGCGACGATCAGTAGCTGGTCTGAGAGGATGATCAGCCACACTGGGACTGAGACACGGCCCAG	0.0407083	0.067465	0.0235544	0	0.0128287	0.0202204	0.0402868	0.0526085	0.0177778	0.0369822	0.0183217	0.0503271	0.0226296	0.018379	0.0239349	0.0451365	0.125905	0.0411946	0.073046	0.0311284	0.0222643	0.0387334	0.0447828	0.0760023	0.0926706	0.0702889	0.166034	0.109078	0.115656	0.0768908	0.0807568	0.153365	Bacteria	Proteobacteria	Alphaproteobacteria	Rhizobiales	Rhizobiales_i.s.	Bauldia
234	GATGAACGCTGGCGGCGTGCTTAACACATGCAAGTCGAACGATGAAGCCCAGCTTGCTGGGTGGATTAGTGGCGAACGGGTGAGTAACACGTGAGCAACCTGCCCCTGACTCTGGGATAA-TCGGTTGGGGATGGGCTCGCGGCCTATCAGCTTGTTGGTGAGGTAATGGCTCACCAAGGCGTCGACGGGTAGCCGGCCTGAGAGGGTGACCGGCCACACTGGGACTGAGACACGGCCCAG	0.630979	0.387924	0.117772	0.335518	0.10263	0.187039	0.0322295	0.157826	0.124444	0.147929	0.274826	0.176145	0.113148	0.220548	0.103718	0.0338524	0.0629525	0.102987	0.0973947	0.124514	0.0222643	0.0387334	0.0335871	0.0760023	0.042123	0.0984044	0.0711575	0.0605987	0.0210283	0.0838809	0.0922935	0.0884799	Bacteria	Actinobacteria	Actinobacteria	Actinomycetales	Microbacteriaceae	Microbacterium
235	AGTGAACGCTGGCGGCAGGCCTAACACATGCAAGTCGAACGGCAGCACAGCAGTAGCAATACTGTGGGTGGCGAGTGGCGGACGGGTGAGGAATACATCGGAATCTGCCTTATCGTGGGG-GCGCGATAAGATGAGCCGATGTCGGATTAGCTAGTTGGCGGGGTAAAGGCCCACCAAGGCGACGATCCGTAGCTGGTCTGAGAGGATGATCAGCCACACTGGAACTGAGACACGGTCCAG	0.0407083	0.0843313	0.0824402	0.132647	0.10263	0.176929	0.0805737	0.0964489	0.0711111	0.0924556	0.0183217	0.0754907	0.0452591	0.0551369	0.0398915	0	0.0786906	0.0411946	0.073046	0.0933852	0.0890571	0.0193667	0.0559785	0.0506682	0.042123	0.0210867	0.0474383	0.0242395	0.0630848	0.0349504	0.0403784	0.0471893	Bacteria	Proteobacteria	Gammaproteobacteria	Xanthomonadales	Xanthomonadaceae	Lysobacter
236	ATTGAACGCTGGCGGAATGCTTTACACATGCAAGTCGAACGGCAGCACGGGGGCAACCCTGGTGGCGAGTGGCGAACGGGTGAGTAATACATCGGAACGTGCCCAGTCGTGGGGGATAAC-GCGCGATTGGAGCGGCCGATGGCAGATTAGGTAGTTGGTGGGGTAAAGGCTCACCAAGCCTGCGATCTGTAGCTGGTCTGAGAGGACGACCAGCCACACTGGGACTGAGACACGGCCCAG	0.376552	0.337325	0.141326	0.265293	0.20526	0.283086	0.161147	0.18413	0.0977778	0.110947	0.146574	0.125818	0.0905182	0.128653	0.0957396	0.0902731	0.173119	0.0411946	0.0973947	0.0622568	0.0890571	0.0968335	0.0895656	0.114003	0.101095	0.0702889	0.0237192	0.0848382	0.0841131	0.097861	0.10383	0.0648853	Bacteria	Proteobacteria	Betaproteobacteria	Burkholderiales	Comamonadaceae	un_Comamonadaceae
237	AACGAACGTTGGCGGCGTGGATTAGGCATGCAAGTCGCACGAGAAAGTCCCCTTCGGGGGGCGAGTAAAGTGGCGGACGGGTGAGTAACGCATGGATAACCTGCCTTCGAGAGAGGGATA-TCGCTCGAAGAGGGGTTCATGTCCTATTAGCTAGTTGGTGAGGTAACGGCTCACCAAGGCTGCGATGGGTAGCCGGCCTGAGAGGGTGTCCGGCCACACTGGGACTGAGACACTGCCCAG	0	0	0.0706631	0.0234082	0.0513149	0.0303306	0.241721	0.175362	0.00888889	0	0.0183217	0	0	0	0	0.0225683	0.0314762	0	0.0486973	0	0.0333964	0.0387334	0.0223914	0.0443347	0.0589722	0.0562311	0.130455	0.206036	0.136684	0.104851	0.0865251	0.117973	Bacteria	Planctomycetes	Planctomycetacia	Planctomycetales	Planctomycetaceae	un_Planctomycetaceae
238	ATTGAACGCTAGCGGGATGCTTTACACATGCAAGTCGAACGGCAGCACGAAGAGCTTGCTCTTTGGTGGCGAGTGGCGAACGGGTGAGTAATATATCGGAACGTGCCCAGTAGCGGGGGA-TCACTATTGGAGCGGCCGATATCGGATTAGCTGGTTGGTGGGGTAAAGGCCTACCAAGGCGACGATCCGTAGCTGGTTTGAGAGGACGACCAGCCACACTGGGACTGAGACACGGCCCAG	0.152656	0.0843313	0.0588859	0.093633	0.109044	0.0960469	0.0725163	0.0876808	0.0533333	0.0369822	0.0366435	0	0.0452591	0.0551369	0.0638264	0.0451365	0.0314762	0.0205973	0.0243487	0.077821	0.0556607	0.0677835	0.0447828	0.0190006	0.042123	0.0351444	0.0711575	0.0242395	0.0630848	0.0419404	0.0230734	0.0235946	Bacteria	Proteobacteria	Betaproteobacteria	Burkholderiales	Alcaligenaceae	Castellaniella
239	GATAAACGCTGGCGGCGTGCCTAATGCATGCAAGTCGCACGGGAGCTTCGGCTCCAGTGGCGGACGGGTGAGTAACACGTAGGAACCTGCCCGAGAGTGGGGGACAACTCCGCGAAAGCG-GCGCTCTCGGAGGGGCCTGCGGCGGATTAGCTTGTTGGTGGGGTAACGGCCTACCAAGGCGACGATCCGTAACTGGTCTGAGAGGATGACCAGTCACACTGGGACTGAGACACGGCCCAG	0.0508854	0.13493	0.270875	0.156055	0.128287	0.126378	0.120861	0.245506	0.0266667	0	0	0	0	0	0.0478698	0.0451365	0.0472144	0.102987	0.0486973	0.124514	0.0556607	0.0774668	0.0447828	0.0253341	0.042123	0.0351444	0.0830171	0.0605987	0.0946273	0.0559206	0.0865251	0.0530879	Bacteria	un_Bacteria	un_Bacteria	un_Bacteria	un_Bacteria	un_Bacteria
240	AGCGAACGCTGGCGGCAGGCCTAACACATGCAAGTCGAACGGACCCTTCGGGGTTAGTGGCGGACGGGTGAGTAACACGTGGGAACGTGCCTTTAGGTTCGGAATAGCTCCTGGAAACGG-TCGCCTTTAGAGCGGCCCGCGTCTGATTAGCTTGTTGGTGAGGTAATGGCTCACCAAGGCTACGATCAGTAGCTGGTCTGAGAGGATGACCAGCCACATTGGGACTGAGACACGGCCCAA	0.17301	0.118064	0.0942174	0.0702247	0.0577293	0.050551	0.0564016	0.0263043	0.0533333	0.0554734	0.0549652	0.0503271	0.0452591	0.0735159	0.151588	0.0789889	0.0944287	0.0823893	0.0973947	0.124514	0.100189	0.0581001	0.0783699	0.0570017	0.0505476	0.0492022	0.0118596	0.0969579	0.0315424	0.0699007	0.0576834	0.0766826	Bacteria	Proteobacteria	Alphaproteobacteria	Caulobacterales	Caulobacteraceae	Brevundimonas
241	ATTGAACGCTGGCGGCATGCCTAACACATGCAAGTCGAACGGTAACAGGCCCTTCGGGGTGCTGACGAGTGGCGAACGGGTGAGTAATACGTAGGAATCTGCCCAGTAGTGGGGGATAAC-GCGCTATTGGATGAGCCTACGTCGGATTAGCTAGTTGGTGAGGTAATGGCTCACCAAGGCGACGATCCGTAGCTGGTCTGAGAGGACGATCAGCCACACTGGGACTGAGACACGGCCCAG	0.0915937	0.202395	0.0706631	0.0546192	0.128287	0.0909918	0.0161147	0.105217	0.168889	0.221893	0.164896	0.0754907	0.113148	0.110274	0.0877613	0.112841	0.125905	0.0205973	0.0243487	0.0466926	0.122454	0.0871502	0.0895656	0.0633352	0.042123	0.0562311	0.0948767	0.0848382	0.0630848	0.0838809	0.0922935	0.0530879	Bacteria	Proteobacteria	Gammaproteobacteria	un_Gammaproteobacteria	un_Gammaproteobacteria	un_Gammaproteobacteria
242	ATTGAACGCTGGCGGCGTGCCTAACACATGCAAGTCGAGCGGCAGCGCGGGAGCAATCCTGGCGGCGAGCGGCGGACGGGTGAGTAACGCTTGGGAATCTGCCTGTTAGTGGGGGACAAC-GCGCTAACAGATGAGCCCAAGTCGGATTAGCTAGTTGGTAGGGTAACGGCCTACCAAGGCTACGATCCGTAACTGGTCTGAGAGGACGACCAGTCACACCGGAACTGAGACACGGTCCGG	0	0	0	0.00780275	0.10263	0.0707714	0.386754	0.201666	0	0	0	0	0	0	0.0079783	0.0225683	0.0157381	0.0205973	0	0.0155642	0.0667928	0	0.0223914	0.00633352	0.0252738	0	0.0948767	0.0969579	0.115656	0.0768908	0.0461467	0.0471893	Bacteria	Proteobacteria	Gammaproteobacteria	Xanthomonadales	Sinobacteraceae	Steroidobacter
243	GATGAACGCTAGCGGCAGGCCTAACACATGCAAGTCGAGGGGCATCGGGGTGCTTGCACCGCCGGCGACCGGCGCACGGGTGAGCAACGCGTACAGAACCTGCCCGTTACAGGGGGACAG-TCGGTAACGGATGGCTGTGCGTCCCATTAGCTAGTTGGGGGGGTAACGGCCCACCAAGGCGTCGATGGGTAGGGGCCCTGAGAGGGGGATCCCCCACACTGGTACTGAGACACGGACCAG	0.0407083	0.0505988	0.0353315	0.0546192	0.0128287	0.0101102	0.0241721	0	0.0888889	0.0739645	0.0916086	0.150981	0.135777	0.0367579	0.103718	0.0789889	0.0472144	0.144181	0.073046	0.124514	0.0556607	0.0677835	0.0671742	0.0570017	0.0505476	0.0492022	0.0474383	0.0363592	0.0315424	0.0768908	0.0634518	0.0589866	Bacteria	Bacteroidetes	Flavobacteria	Flavobacteriales	Flavobacteriaceae	Arenibacter
244	AATCAACGCTGGCGGCGTGCCTAACACATGCAAGTCGAACGAGAAAGTGGAGCAATCCATGAGTAAAGTGGCGACCGGGTGAGTAACACGTGACTAACCTACCTTCGAGTGGGGGATAAC-TCGCTGGAAGAGGGGGTCGCGGCTGATTAGCTAGTTGGCGGGGTAACGGCCCACCAAGGCTTAGATCGGTAGCCGGCCTGAGAGGGCGCACGGCCACACTGGAACTGAAACACGGTCCAG	0.0305312	0.067465	0.0824402	0.0390137	0.0320718	0.0101102	0.0161147	0.00876808	0.0977778	0.0924556	0.0366435	0.0503271	0.113148	0.110274	0.0638264	0.0902731	0.110167	0.0823893	0.073046	0.0155642	0.0445286	0.0484168	0.0223914	0.0760023	0.0336984	0.0281156	0.0592979	0.0969579	0.0315424	0.0349504	0.0576834	0.0943786	Bacteria	Acidobacteria	Acidobacteria_Gp1	Acidobacteria_Gp1	Acidobacteria_Gp1	Gp1
245	GACGAACGCTGGCGGCGTGCTTAACACATGCAAGTCGAGCGAGGTCCTACCGGTGGCAACACCGGGAAAGACCTAGCGGCGAACGGGTGAGTAACACGTGAGGAACCTGCCCCGAAGACC-CCGCTTCGGGAGGGCCTCGCGGCCTATCAGCTTGTTGGTGAGGTAACGGCTCACCAAGGCGACGACGGGTAGCTGGTCTGAGAGGACGATCAGCCACACTGGGACTGAGACACGGCCCAG	0.132302	0.13493	0.0942174	0.101436	0.0256575	0.0556061	0.0322295	0.0876808	0.0355556	0.0184911	0.238182	0.100654	0.158407	0.0735159	0.0398915	0.0564207	0.0472144	0.0205973	0.0243487	0.0466926	0.0111321	0.0677835	0.0671742	0.0190006	0.0168492	0.0562311	0.0592979	0.0605987	0.0210283	0.0559206	0.0692201	0.0648853	Bacteria	Actinobacteria	Actinobacteria	Acidimicrobiales	un_Acidimicrobiales	un_Acidimicrobiales
246	ATTGAACGCTGGCGGCATGCTTTACACATGCAAGTCGAACGGGGTGCGGGGGCAACTTCGCATTCAGTGGCGAACGGGTGAGTAATGCATCGGAACGTGTCCCGTAGTGGGGGATAACCC-GTGCTAGGGGGGCGGCCGATGTCCGATTAGCTTGTTGGTGGGGTAATGGCCCACCAAGGCTGCGATCGGTAGCTGGTCTGAGAGGATGATCAGCCACACTGGGACTGAGACACGGCCCAG	0.0101771	0	0.0235544	0.0156055	0.0577293	0.0303306	0.0402868	0.0350723	0.0444444	0.0184911	0.10993	0.0754907	0	0.0551369	0.0638264	0.157978	0.141643	0.061792	0.073046	0.124514	0.0667928	0	0.0783699	0.101336	0.0505476	0.0421733	0.0948767	0.0969579	0.0946273	0.0559206	0.0519151	0.0648853	Bacteria	Proteobacteria	Betaproteobacteria	un_Betaproteobacteria	un_Betaproteobacteria	un_Betaproteobacteria
247	ATTGAACGCTGGCGGCATGCCTTACACATGCAAGTCGAACGGTAACAGGGGCTTCGGCCCGCTGACGAGTGGCGGACGGGTGAGTAATACATCGGAATGTACCCAGTAGTGGGGGATAGC-GTGCTATTGGAGCAGCCGATGTCAGATTAGCTAGTTGGTGGGGTAAAAGCCTACCAAGGCGACGATCTGTAACTGGTCTGAGAGGACGACCAGTCACACTGGGACTGAGACACGGCCCAG	0.0101771	0.13493	0.153103	0.0468165	0.0449006	0.0808816	0.0725163	0.113985	0.0266667	0.0184911	0.0183217	0.125818	0.0226296	0	0.0239349	0.0564207	0.0786906	0.144181	0.0973947	0.0933852	0.077925	0.0581001	0.111957	0.0633352	0.0505476	0.0492022	0.0474383	0.048479	0.073599	0.0629107	0.0403784	0.0530879	Bacteria	Proteobacteria	Betaproteobacteria	Burkholderiales	un_Burkholderiales	un_Burkholderiales
248	AGCGAACGCTGGCGGCAGGCTTAACACATGCAAGTCGAACGGGCGTAGCAATACGTCAGTGGCAGACGGGTGAGTAACGCGTGGGAACGTACCTTTTGGTTCGGAACAACCCAGGGAAAC-TCGCCGAAAGATCGGCCCGCGTCTGATTAGCTTGTTGGTGAGGTAACGGCTCACCAAGGCGACGATCAGTAGCTGGTCTGAGAGGATGATCAGCCACATTGGGACTGAGACACGGCCCAA	0.0305312	0.101198	0.188435	0.234082	0.0962155	0.126378	0.0322295	0.0876808	0	0	0	0.0251636	0.0226296	0	0.127653	0.0677048	0.0629525	0.061792	0.0973947	0.0466926	0.0222643	0.0581001	0.0335871	0.0253341	0.0168492	0.0492022	0.0118596	0.0121197	0.0105141	0.0279603	0.0288417	0.0471893	Bacteria	Proteobacteria	Alphaproteobacteria	Rhizobiales	Bradyrhizobiaceae	Nitrobacter
249	GACAAACGCTGGCGGAATGTATTAGGCATGCAAGTCGCACGGACCTTCGGGTCAGTGGCGGACGGGTGAGTAACACGTGGGTAACCTGCCTCGTAGTGGGGGATAACTCGCCGAAAGGCG-GCGCTACGAGAGGGGCCCGCGGCCGATTAGCTAGTTGGTGGGGTAATGGCTCACCAAGGCGACGATCGGTAGCTGGTCTGAGAGGATGGTCAGCCACACGGGGACTGAGACACGGCCCCG	0.111948	0.303593	0.0824402	0.0546192	0.0513149	0.0758265	0.00805737	0.113985	0.106667	0.147929	0.0916086	0.0754907	0.0226296	0.110274	0.0398915	0.0338524	0.0472144	0.0205973	0.0243487	0.0155642	0.0667928	0.0484168	0.0335871	0.0190006	0.0252738	0.0702889	0.0237192	0.0363592	0	0.0699007	0.0461467	0.0412906	Bacteria	un_Bacteria	un_Bacteria	un_Bacteria	un_Bacteria	un_Bacteria
250	GACGAACGCTGGCGGCGTGCCTAACACATGCAAGTCGAACGGGACCAGGGGCAACTCTGGTTCAGTGGCGGACGGGTGCGTAACACGTGAGGAACATGACTTTCGGCGGGGGATAGCCGG-GCACCGAAAGAGTGCCTCGCGGCCTATCAGCTAGTTGGTGGGGTAACGGCTCACCAAGGCGACGACGGGTAGCTGGTCTGAGAGGATGGCCAGCCACATTGGGACTGAGACACGGCCCAG	0.0610625	0.0168663	0.0824402	0.101436	0.0705581	0.0606612	0.0644589	0.140289	0.0977778	0.0184911	0.10993	0.0754907	0.0678887	0	0.079783	0.0564207	0.0786906	0.0823893	0.0973947	0.140078	0.15585	0.0484168	0.0335871	0.114003	0.0926706	0.12652	0.118596	0.0727185	0.0630848	0.118831	0.161514	0.194656	Bacteria	un_Bacteria	un_Bacteria	un_Bacteria	un_Bacteria	un_Bacteria
251	AACGAACGCTGGCGGCAGGCCTAACACATGCAAGTCGAACGCCCTAGCAATAGGGAGTGGCAGACGGGTGAGTAACGCGTGGGAACCTTCCCAGTGGTACGGAATAGCCCAGGGAAACTT-TCGCCATTGGATGGGCCCGCGTCGGATTAGCTAGTTGGTGAGGTAATGGCTCACCAAGGCGACGATCCGTAGCTGGTCTGAGAGGATGATCAGCCACACTGGGACTGAGACACGGCCCAG	0.0101771	0.067465	0.0353315	0.031211	0.0384862	0.0202204	0.177262	0.18413	0.00888889	0	0.0366435	0	0.0678887	0.018379	0.0239349	0.0451365	0.0157381	0.0411946	0	0.0466926	0.0556607	0.00968335	0.0223914	0.0380011	0.0589722	0.0210867	0.106736	0.0727185	0.0630848	0.090871	0.0749885	0.112075	Bacteria	Proteobacteria	Alphaproteobacteria	Rhizobiales	Hyphomicrobiaceae	un_Hyphomicrobiaceae
252	GACGAACGCTGGCGGCGTGCTTAACACATGCAAGTCGAACGATGAACCACTTCGGTGGGGATTAGTGGCGAACGGGTGAGTAACACGTGGGCAATCTGCCCTTCACTCTGGGACAAGCCC-GCGGTGAAGGATGAGCCCGCGGCCTATCAGCTTGTTGGTGAGGTAATGGCTCACCAAGGCGACGACGGGTAGCCGGCCTGAGAGGGCGACCGGCCACACTGGGACTGAGACACGGCCCAG	0.0712396	0.101198	0.0942174	0.210674	0.0449006	0.176929	0.0644589	0.18413	0.00888889	0.0924556	0.0549652	0.0251636	0.0226296	0.0367579	0.0638264	0.0677048	0.0157381	0.185376	0.121743	0.140078	0.077925	0.0677835	0	0.0950029	0.0926706	0.196809	0.0237192	0.0605987	0.0105141	0.097861	0.0922935	0.129771	Bacteria	Actinobacteria	Actinobacteria	Actinomycetales	Streptomycetaceae	Streptomyces
253	GACGAACGCTGGCGGCGTGCTTAACACATGCAAGTCGAACGGTGATCTCGGGGCTTGCTCCGGGTGATCAGTGGCGAACGGGTGAGTAACACGTGAGTAACCTGCCCCTGGCTCTGGGAT-TCGGCCTGGGATGGGCTCGCGGCCTATCAGCTTGTTGGTGGGGTAGTGGCCTACCAAGGCGACGACGGGTAGCCGGCCTGAGAGGGCGACCGGCCACACTGGGACTGAGACACGGCCCAG	0.17301	0.118064	0.0471087	0.117041	0.0513149	0.0707714	0.0725163	0.131521	0.0355556	0.0924556	0.128252	0.0503271	0.0226296	0.0735159	0	0.0564207	0	0.0205973	0.0243487	0.0311284	0	0.106517	0.0223914	0.00633352	0.0084246	0.0492022	0.0474383	0.0605987	0	0.0559206	0.0461467	0.035392	Bacteria	Actinobacteria	Actinobacteria	Actinomycetales	Kineosporiaceae	Angustibacter
254	GATGAACGCTAGCGGCAGGCCTAATACATGCAAGCTGAACGGTAAATATTGTAGCAATACGATATGAGAGTAGCGTAAGGGTGCGTAACACGTATGCAATCTGCCCTGTACAGGAGGATA-ACGGTATGGGATGAGCATGCGTCTGATTAGCTAGTTGGTGGTGTAACGGACCACCAAGGCGATGATCAGTAGGGGAACTGAGAGGTTGATCCCCCACACTGGCACTGAGATACGGGCCAG	0.0101771	0.0337325	0.0824402	0.0546192	0.10263	0.0707714	0.241721	0.157826	0.106667	0.0554734	0	0.100654	0.0905182	0.018379	0.079783	0.101557	0.0629525	0.061792	0.0243487	0.077821	0.166982	0.1743	0.0447828	0.12667	0.0589722	0.0702889	0.106736	0.290874	0.189255	0.230672	0.132672	0.141568	Bacteria	Bacteroidetes	Bacteroidetes_i.s.	Bacteroidetes_i.s.	Bacteroidetes_i.s.	Ohtaekwangia
255	AGCGAACGCTGGCGGCAGGCTTAACACATGCAAGTCGAGCGCCCCGCAAGGGGAGCGGCAGACGGGTGAGTAACACGTGGGAACGTACCCTTTGGTTCGGAACAACCCAGGGAAACTTGG-TCGCCAAAGGATCGGCCCGCGTCTGATTAGCTAGTTGGTGGGGTAATGGCCCACCAAGGCTACGATCAGTAGCTGGTCTGAGAGGATGATCAGCCACATTGGGACTGAGACACGGCCCAA	0.0101771	0	0.0824402	0.0780275	0.0705581	0.0202204	0.0966884	0.122753	0.0977778	0.0554734	0.0183217	0.0251636	0.0452591	0.0551369	0.0718047	0.13541	0.0314762	0.0205973	0.0486973	0.0311284	0.0445286	0.0774668	0.0223914	0.0380011	0.0252738	0.0773178	0.0355787	0.0363592	0.073599	0.0768908	0.0403784	0.106176	Bacteria	Proteobacteria	Alphaproteobacteria	Rhizobiales	Hyphomicrobiaceae	Rhodoplanes
256	GATGAACGCTAGCGGGAGGCTTAATACATGCAAGTCGTACGGTAACAGGGGAGCTTGCTCCTGCTGACGAGTGGCGGACGGGTGAGTAACGCGTACACGATCTACCTATAAGTCTGGGAT-CTGCTTATAGATGGGTGTGCGTCCTATTAGTTAGTTGGTGAGGTAACGGCTCACCAAGACGATGATAGGTAGGGGGCGTGAGAGCGTGGACCCCCACACGGGTACTGAGACACGGACCCG	0.0407083	0.0168663	0.0353315	0.0234082	0.0256575	0.050551	0	0.0175362	0.115556	0.129438	0.0732869	0.0754907	0.0678887	0.147032	0.0319132	0.0677048	0.0944287	0.123584	0.0973947	0.0622568	0.0890571	0.0290501	0.0671742	0.0380011	0.10952	0.0351444	0.0474383	0	0	0.0559206	0.0230734	0.017696	Bacteria	Bacteroidetes	Sphingobacteria	Sphingobacteriales	Saprospiraceae	Haliscomenobacter
257	ATTGAACGCTGGCGGCATGCTTAACACATGCAAGTCGAACGGCAGCGCGGGGAAGCTTGCTTCCCTGGCGGCGAGTGGCGGACGGGTGAGGAATGCATCGGAATCTGCCCAGTCGTGGGG-GCGCGGTTGGATGAGCCGATGCCGGATTAGCTAGTTGGCGGGGTAAAGGCCCACCAAGGCGACGATCCGTAGCTGGTCTGAGAGGATGATCAGCCACACCGGGACTGAGACACGGCCCGG	0.0508854	0.118064	0	0	0.0320718	0	0	0.00876808	0.16	0.351331	0.183217	0.226472	0.316814	0.238927	0.0239349	0.0564207	0.0157381	0.0205973	0.0243487	0.108949	0.0333964	0.00968335	0.0671742	0.0316676	0.042123	0.0210867	0.0355787	0.0363592	0.0315424	0.0209702	0.0115367	0.035392	Bacteria	Proteobacteria	Gammaproteobacteria	Xanthomonadales	Xanthomonadaceae	Pseudofulvimonas
258	AACGAACGCTGGCGGCAGGCCTAACACATGCAAGTCGAACGCCCTGGCAACAGGGAGTGGCAGACGGGTGAGTAACGCGTGGGAATCTACCTTGTGGTACGGAACAACCAAGGGAAACTT-TCGCCATAAGATGAGCCCGCGTAGGATTAGCTAGTTGGTGAGGTAATGGCTCACCAAGGCGACGATCCTTAGCTGGTCTGAGAGGATGACCAGCCACACTGGGACTGAGACACGGCCCAG	0.0203542	0.0337325	0.0353315	0.0234082	0.0192431	0.0353857	0.0322295	0.0438404	0.106667	0.147929	0.0732869	0.0503271	0.135777	0.128653	0.0558481	0.0112841	0.0944287	0.061792	0.073046	0.0311284	0.0890571	0.0484168	0.134348	0.0380011	0.0589722	0.0492022	0.0711575	0.0605987	0.0315424	0.0559206	0.017305	0.0471893	Bacteria	Proteobacteria	Alphaproteobacteria	Rhizobiales	Rhizobiaceae	Kaistia
259	ATTGAACGCTGGCGGCATGCCTAACACATGCAAGTCGAACGGCAGCATGGTCCAGCTTGCTGGACTGATGGCGAGTGGCGAACGGGTGAGTAATACGTAGGAATATGCCTTAAAGAGGGG-GCGCTTTAAGATTAGCCTACGTCCGATTAGCTAGTTGGTGGGGTAAAGGCTTACCAAGGCGACGATCGGTAGCTGGTCTGAGAGGATGGACAGCCACACTGGGACTGAGACACGGCCCAG	0	0	0.0942174	0.00780275	0.0577293	0.0556061	0	0	0.00888889	0.0184911	0	0.0251636	0	0	0.207436	0.157978	0.0786906	0	0	0	0.122454	0.0484168	0.0223914	0.0253341	0.0336984	0.0492022	0.130455	0.0969579	0.0315424	0.0629107	0.0288417	0.0530879	Bacteria	Proteobacteria	Gammaproteobacteria	Legionellales	Legionellaceae	Legionella
260	GATGAACGCTAGCGGCAGGCCTAACACATGCAAGTCGAGGGGCATCACGGAAAAGCTTGCTTTTCTGGTGGCGACCGGCGCACGGGTGAGGAACACGTATGGAACCTGCCCCTGTCAGGG-TCGGACAGGGATGGCCATGCGCACCATTAGCTAGTTGGTAGGGTAACGGCCTACCAAGGCAGCGATGGTTAGGGGCCCTGAGAGGGGGATCCCCCACACTGGTACTGAGACACGGACCAG	0.0305312	0.0505988	0.105995	0.0468165	0.0128287	0.0151653	0.0322295	0.00876808	0.0177778	0.0369822	0.0549652	0	0	0.0367579	0.0558481	0.101557	0.0944287	0	0.292184	0.0466926	0.077925	0.0193667	0.0671742	0.0633352	0.0673968	0.133549	0.0711575	0.0605987	0.0841131	0.0419404	0.0346101	0.0648853	Bacteria	Bacteroidetes	Flavobacteria	Flavobacteriales	Flavobacteriaceae	Muricauda
261	GAACAACGCTGGCGGCGTGCCTAATGCATGCAAGTCGAACGGGAGCCGCTTCGGCGGCCGACCGTGGCGGACGGGTGAGGAGCACGTGGGTAACCTGCCCCGACGCGGGGGATAACTGCG-CCGCGCCGGGAGGGGCCTGCGGCCTATCAGCTAGACGGTGGGGTAACGGCTCACCGTGGCGATGACGGGTAGCTGGTCTGAGAGGACGATCAGCCACACGGGGACTGAGACACGGCCCCG	0.0508854	0.0337325	0.0706631	0.109238	0.0513149	0.0353857	0.0161147	0.0789128	0.0977778	0.0739645	0.201539	0.0251636	0.203666	0.0918949	0.0478698	0.0789889	0.0472144	0.0823893	0.073046	0.140078	0.0333964	0.0387334	0.0447828	0.0443347	0.0589722	0.0210867	0.0830171	0.0605987	0.0525707	0.0489305	0.0865251	0.0943786	Bacteria	Chloroflexi	Thermomicrobia	Sphaerobacterales	Sphaerobacteraceae	Sphaerobacter
262	GACGAACGCTGGCGGCGTGCTTAATACATGCAAGTCGTACGAGGCTGTCCCTGGCTTGCCAGGGGCTGACCTAGTGGCGAACGGGTGAGTAACACGTGAGGAACCTACCCCAGAGCCGGG-GCGCTCTGGGAGGGCCTCGCGGCCTATCAGCTTGTTGGCGGGGTAACGGCCCACCAAGGCTACGACGGGTAGCTGGTCTGAGAGGACGATCAGCCACACTGGGACTGAGACACGGCCCAG	0.0407083	0.0505988	0.0942174	0.0390137	0.0384862	0.0556061	0.0161147	0.0964489	0.0622222	0.0554734	0.128252	0.150981	0.0678887	0.0551369	0.0398915	0.0225683	0	0.0411946	0.0486973	0	0.0222643	0.0581001	0.0111957	0.0380011	0.0336984	0.0843467	0.0711575	0.0242395	0.0315424	0.0349504	0.0634518	0.0530879	Bacteria	Actinobacteria	Actinobacteria	Acidimicrobiales	un_Acidimicrobiales	un_Acidimicrobiales
263	AATCAACGCTGGCGGCGTGCCTCAGACATGCAAGTCGAACGATTAAGACTTCCTTCGGGAAGTGTATAAAGTGGCGCACGGGTGAGTAACACGTAAGTAATCTGCCTTCGAGTGGGGAAT-CCGCTTGAAGAGGAGCTTGCGGCAGATTAGCTAGTTGGTAAGGTAACGGCTTACCAAGGCTACGATCTGTATCCGGTCTAAGAGGACGGTCGGACACACTGACACTGAATAACGGGTCAG	0	0.0505988	0.105995	0.101436	0.0705581	0.101102	0.0725163	0.0964489	0.0355556	0.0554734	0.0183217	0.0503271	0.0452591	0.0367579	0.0319132	0.0451365	0.0472144	0	0.0243487	0.0466926	0.0111321	0.00968335	0.0671742	0.0570017	0.0252738	0.0492022	0.0237192	0.0727185	0.0210283	0.0419404	0.0115367	0.0235946	Bacteria	Acidobacteria	Acidobacteria_Gp4	Acidobacteria_Gp4	Acidobacteria_Gp4	Gp4
264	GATTAACGCTGGCGGCGTGCCTAAGGTATGCAAGTCGAACGATAAGCCATCTTCGGATGGTGGACAGTGGCAAACTGCTGAGTAACGCGTAGGAACCTACCCATAAGTCAAGGATAGCTC-GCGCTTATGGATGGGCCTGCGTTCTATCAGGTTGTTGGTGAGGTAAAGGCTCACCAAGCCTATGACGGATAGCTGGTCTGAGAGGACGATCAGCCAGACTGGGACTGCGACACTGCCCAG	0	0	0.0117772	0	0.0128287	0	0.0322295	0	0	0	0.0183217	0	0	0	0.0718047	0.0112841	0.0472144	0	0	0	0.3117	0.0193667	0.0447828	0.0316676	0.0336984	0.00702889	0.213472	0.230275	0.241825	0.0209702	0.0403784	0.117973	Bacteria	un_Bacteria	un_Bacteria	un_Bacteria	un_Bacteria	un_Bacteria
265	ATTGAACGCTGGCGGCAGGCCTAACACATGCAAGTCGAGCGGATGAAGGGAGCTTGCTCTCTGATTCAGCGGCGGACGGGTGAGTAATGCCTAGGAATCTGCCTGGTAGTGGGGGACAAC-GCGCTATCAGATGAGCCTAGGTCGGATTAGCTAGTTGGTGAGGTAATGGCTCACCAAGGCTGCGATCCGTAACTGGTCTGAGAGGATGATCAGTCACACTGGAACTGAGACACGGTCCAG	0.305312	0.101198	0.105995	0.218477	0.0898012	0.146598	0.0402868	0.0438404	0.0622222	0.184911	0.0732869	0.0754907	0.0226296	0.018379	0.0159566	0.0112841	0	0.0205973	0.0243487	0.0155642	0	0.00968335	0.0111957	0.0190006	0.0084246	0.0351444	0.0118596	0	0	0.0139801	0.0115367	0.00589866	Bacteria	Proteobacteria	Gammaproteobacteria	Pseudomonadales	Pseudomonadaceae	Pseudomonas
266	GACGAACGCTGGCGGCGCGCTTAACACATGCAAGTCGAGCGAGAACCAGGCCTTCGGGCCTGGGGACAGCGGCGAACGGGTGAGTAACACGTGGGTAATCAACCCTCGATACTGGGATAG-CCGATCGAGGACGAGCCCGCGGCGGATTAGCTTGTTGGTGAGGTAACGGCTCACCAAGGCGACGATCCGTAGCTGGTCTGAGAGGACGATCAGCCACACTGGGACTGAGACACGGCCCAG	0.0407083	0.0337325	0.0117772	0.0156055	0.0513149	0.0151653	0.00805737	0.0263043	0.151111	0.0924556	0.146574	0.0503271	0.0678887	0.165411	0.079783	0.112841	0.0786906	0.102987	0.0486973	0.0622568	0.0445286	0.0871502	0.0559785	0.101336	0.0673968	0.0913756	0.118596	0.0363592	0.0420566	0.0559206	0.0980618	0.123872	Bacteria	Actinobacteria	Actinobacteria	un_Actinobacteria	un_Actinobacteria	un_Actinobacteria
267	GATGAACGCTGGCGGCGTGCCTAATACATGCAAGTCGAACGAGGTGCTTTTGTAGCAATACGAGAGTATCCTAGTGGCGAACGGGTGAGTAACGCGTTGGTGACCTACCCCAAAGTGTGG-TCGCTTTGGGAGGGACCTGCGTCCCATCAGCTAGTTGGTGAGGTAATGGCTCACCAAGGCGACGACGGGTAGGGGACCTGAGAGGGTGGCCCCCCACAATGGAACTGAAACACGGTCCAT	0.0915937	0.0505988	0.16488	0.101436	0.0705581	0.0960469	0.161147	0.192898	0.115556	0.0554734	0.10993	0.0251636	0	0.0735159	0.167544	0.112841	0.125905	0.0411946	0.121743	0.108949	0.144718	0.0484168	0.0447828	0.10767	0.0336984	0.0984044	0.0711575	0.121197	0.262854	0.090871	0.0865251	0.117973	Bacteria	Chloroflexi	Anaerolineae	Anaerolineales	Anaerolineaceae	un_Anaerolineaceae
268	AACGAACGCTGGCGGCATGCCTAACACATGCAAGTCGAACGAAGCCTTCGGGCTTAGTGGCGCACGGGTGCGTAACGCGTGGGAATCTACCCTCTGGTACGGAATAACTCAGGGAAACTT-TCGCCTGAGGATGAGCCCGCGTAGGATTAGCTAGTTGGTGAGGTAAAAGCTCACCAAGGCGACGATCCTTAGCTGGTCTGAGAGGATGATCAGCCACACTGGGACTGAGACACGGCCCAG	0.0610625	0.118064	0.105995	0.0858302	0.0641437	0.0606612	0.0886311	0.0438404	0.0355556	0.0554734	0.0732869	0.0503271	0.0678887	0.0367579	0.0718047	0.0789889	0.0629525	0.0205973	0.170441	0.0311284	0.0667928	0.0290501	0.0447828	0.0443347	0.042123	0.0421733	0.0118596	0.0242395	0.0525707	0.0489305	0.0403784	0.017696	Bacteria	Proteobacteria	Alphaproteobacteria	Sphingomonadales	Sphingomonadaceae	Sphingomonas
269	AATCAACGCTGGCGGCGTGCCTCAGACATGCAAGTCGAACGCGAAAGTTTCCTTCGGGGAACGAGTAGAGTGGCGCACGGGTGAGTAACACGTAGGTAATCTACCTTTGGATGGGGAATA-GCGTCTAAAGAGGAGCCTGCGGCGGATTAGCTAGTTGGTAAGGTAACGGCTTACCAAGGCGATGATCCGTAGCCGGCCTGAGAGGGCGGTCGGCCACACTGACACTGACATACGGGTCAG	0.0610625	0.0337325	0.0824402	0.031211	0.0898012	0.0353857	0.0644589	0.0701447	0.0711111	0.0369822	0.0549652	0.0503271	0.0226296	0	0.079783	0.0451365	0.0314762	0.0411946	0	0.0311284	0.0667928	0.0484168	0.0895656	0.0190006	0.0084246	0.00702889	0.0711575	0.0242395	0.0315424	0.0349504	0.0346101	0.0294933	Bacteria	Acidobacteria	Acidobacteria_Gp4	Acidobacteria_Gp4	Acidobacteria_Gp4	Gp4
270	AACGAACGCTGGCGGCAGGCTTAACACATGCAAGTCGAGCGCCCCGCAAGGGGAGCGGCAGACGGGTGAGTAACACGTGGGAATCTACCCATCCCTGCGGAACAACTCCGGGAAACTGGA-TCGGGGATGGATGAGCCCGCGTTGGATTAGCTAGTTGGTGGGGTAAAGGCCTACCAAGGCGACGATCCATAGCTGGTCTGAGAGGATGATCAGCCACATTGGGACTGAGACACGGCCCAA	0.0712396	0.0505988	0.0706631	0.0702247	0.0513149	0.0202204	0.0564016	0.0964489	0.0977778	0.0739645	0.128252	0.0754907	0.0452591	0	0.0718047	0.0112841	0.0314762	0.123584	0.0973947	0.0933852	0.0556607	0.0484168	0.0223914	0.0380011	0.042123	0.0351444	0.0592979	0.0363592	0.0315424	0.0139801	0.017305	0.0530879	Bacteria	Proteobacteria	Alphaproteobacteria	Rhizobiales	Rhizobiaceae	Rhizobium
271	GACGAACGCTGGCGGCGTGCCTAACACATGCAAGTCGAGCGGGAACCTCAGGAGGGGTAACCCTTCTGAGGGGAGAGCGGCGAACGGGTGAGTAACACGTGGGCAACCTGCCCCGGACAC-ACGGTCCGGGATGGGCCCGCGGCCTATCAGCTTGTTGGTGGGGTAACGGCCCACCAAGGCGACGACGGGTAGCTGGTCTGAGAGGACGGCCAGCCACACTGGGACTGAGACACGGCCCAG	0	0.0168663	0.0706631	0.031211	0.0192431	0.0101102	0	0.00876808	0.106667	0.0184911	0.146574	0.0503271	0.135777	0.018379	0.0638264	0.0789889	0.0157381	0.061792	0	0.0311284	0.0222643	0.0677835	0.0783699	0.0380011	0.0336984	0.0984044	0.106736	0.145437	0.0525707	0.090871	0.0749885	0.135669	Bacteria	Actinobacteria	Actinobacteria	un_Actinobacteria	un_Actinobacteria	un_Actinobacteria
272	GATGAACGCTGGCGGTGTGCCTTAGACATGCAAGTCGAACGAAGCACCTTTTTTGGATCCCTTCGGGGTGAAGCATTTGGTGACTTAGTGGCGAACGGGTGAGTAACACGTGGGTGACCT-TCGCTTCGGGATGGGCCCGCGGTCCATCAGCTAGTTGGTAGGGTAATGGCCTACCAAGGCGACGACGGATAGCCGGCCTGAGAGGGCGATCGGCCACAGGGGCACTGAGATACGGGCCCC	0.0610625	0.067465	0.0706631	0.117041	0.0513149	0.0556061	0.0483442	0.0789128	0.08	0.0369822	0.0366435	0.0251636	0.0226296	0	0.0398915	0.0451365	0.0472144	0.0205973	0.073046	0.0311284	0.0445286	0.0581001	0.0447828	0.0316676	0.0252738	0.0210867	0.0237192	0.0242395	0.0315424	0.00699007	0.0288417	0.017696	Bacteria	Deinococcus-Thermus	Deinococci	Deinococcales	Trueperaceae	Truepera
273	AATCAACGCTGGCGGCGTGCCTAACACATGCAAGTCGAACGCGAAAGCCCCGCAAGGGGTAAGTAGAGTGGCAAACGGGTGAGTAACACGTGGGTGACCTGCCTTCGAGTGGGGGATAAC-GCGCTTGAAGAGGGGCCCGCGCCTGATTAGCTAGTTGGTAGGGTAACGGCCTACCAAGGCAACGATCAGTATCCGGCCTGAGAGGGCGGACGGACACACTGGGACTGAGACACGGCCCAG	0.0508854	0	0.0824402	0.062422	0.115459	0.0808816	0.0725163	0.0876808	0.16	0.110947	0.0916086	0.0503271	0.0452591	0.018379	0.0718047	0.0789889	0.173119	0.0205973	0.073046	0	0.0890571	0.0774668	0.0671742	0.0886693	0.0926706	0.0702889	0.118596	0.0605987	0.0630848	0.0699007	0.0922935	0.0589866	Bacteria	Acidobacteria	Acidobacteria_Gp6	Acidobacteria_Gp6	Acidobacteria_Gp6	Gp6
274	AACGAACGCTGGCGGCATGCCTAACACATGCAAGTCGAACGAGACCTTCGGGTCTAGTGGCGCACGGGTGCGTAACGCGTGGGAATCTGCCCAAAGGTTCGGAATAACTCAGGGAAACTT-TTGCCTTTGGATGAGCCCGCGTCGGATTAGCTAGTTGGTGAGGTAAAGGCTCACCAAGGCGACGATCCGTAGCTGGTCTGAGAGGATGATCAGCCACACTGGGACTGAGACACGGCCCAG	0.0203542	0.0168663	0.0942174	0.0390137	0.0898012	0.0657163	0.0805737	0.0438404	0.0177778	0	0	0	0	0.018379	0.0478698	0.0225683	0.0157381	0.0411946	0.073046	0.0466926	0.133586	0.0581001	0.0223914	0.0316676	0.042123	0.0210867	0.0237192	0.048479	0.0525707	0.0559206	0.0519151	0.017696	Bacteria	Proteobacteria	Alphaproteobacteria	Sphingomonadales	Sphingomonadaceae	Sphingomonas
275	AATCAACGCTGGCGGCGCGCTTAACACATGCAAGTCGCACGAGAAAGTGGAGCAATCCATGAGTACAGTGGCGTACGGGTGAGTAACACGTGGATCATCTACCTTTTAGTGGGGAATACC-GCGCTGAAAGAGGAGTCCGCGGCTGATTAGCTAGTTGGTGAGGTAATGGCTCACCAAGGCGAAGATCGGTAGCCGGCCTGAGAGGGCACACGGCCACACTGGCACTGAAACACGGGCCAG	0.0203542	0.067465	0.0235544	0.062422	0.0256575	0.0101102	0.00805737	0	0.142222	0.0924556	0.0732869	0.100654	0.158407	0.0551369	0.0718047	0.0564207	0.0629525	0.061792	0.0486973	0.0311284	0.0445286	0	0.0223914	0.0443347	0.0336984	0.0281156	0.0830171	0.0121197	0.0315424	0.0559206	0.0519151	0.035392	Bacteria	Acidobacteria	Acidobacteria_Gp3	Acidobacteria_Gp3	Acidobacteria_Gp3	Gp3
276	GATCAACGCTGGCGGCGTGCCTAACGCATGCAAGTCGGACGGGCTCGGCTTTCGGGTCGAGCGCCGTGGCGGACGGGTGCGTAACACGTAGGCAACCTGCCCTGGGGTGGGGGATAACCC-GCGCCCTAGGAGGGGCCTGCGGCCGATTAGCTTGTTGGTGGGGTAACGGCCTACCAAGGCGATGATCGGTAGCTGGTCTGAGAGGACGGCCAGCCACAGGGGGACTGAGACACGGCCCCC	0.101771	0.0337325	0.0588859	0.031211	0.0577293	0.0151653	0.00805737	0.0175362	0.0355556	0.0554734	0.0183217	0.0251636	0.158407	0.128653	0.0478698	0.0564207	0.0944287	0.0411946	0.073046	0.077821	0.0222643	0.0677835	0.0783699	0.0443347	0.0336984	0.0421733	0.0237192	0.0363592	0.0210283	0.0419404	0.0519151	0.0530879	Bacteria	un_Bacteria	un_Bacteria	un_Bacteria	un_Bacteria	un_Bacteria
277	GACGAACGCTGGCGGCGTGCTTAACACATGCAAGTCGAGCGGTAAGGCTCCTTCGGGAGTACACGAGCGGCGAACGGGTGAGTAACACGTGAGCAATCTGCCCTTCACATCGGGATAACT-GCGGTGAAGGATGAGCTCGCGGCCTATCAGCTTGTTGGTGGGGTAACGGCCCACCAAGGCTTCGACGGGTAGCCGGCCTGAGAGGGTGACCGGCCACACTGGGACTGAGACACGGCCCAG	0.0101771	0.0337325	0.0588859	0.0858302	0.0384862	0.0657163	0.0161147	0.0526085	0.0266667	0.0554734	0.0183217	0.100654	0.0226296	0.018379	0.0877613	0.0225683	0.0944287	0.123584	0.0486973	0.0311284	0.0556607	0.0387334	0.0335871	0.0443347	0.0168492	0.06326	0.0711575	0.0121197	0.0525707	0.0629107	0.0980618	0.0943786	Bacteria	Actinobacteria	Actinobacteria	Actinomycetales	Nocardioidaceae	Marmoricola
278	GATGAACGCTGGCGGCGTGCTTAACACATGCAAGTCGAACGGTGAAAGCGGAGCTTGCTCTGCTGGATCAGTGGCGAACGGGTGAGTAACACGTGAGCAACCTGCCCCGGACTCTGGGAT-TCGGTCCGGGATGGGCTCGCGGCCTATCAGCTAGTTGGTGAGGTAACGGCTCACCAAGGCGTCGACGGGTAGCCGGCCTGAGAGGGTGACCGGCCACACTGGGACTGAGACACGGCCCAG	0.0407083	0.0337325	0.0824402	0.093633	0.0320718	0.0606612	0.0483442	0.149057	0	0	0.0183217	0.0251636	0	0	0.0159566	0	0	0.0411946	0.0243487	0.124514	0.0111321	0.0193667	0.0223914	0.0316676	0.0084246	0.105433	0.0237192	0.0363592	0.0210283	0.0768908	0.0922935	0.0530879	Bacteria	Actinobacteria	Actinobacteria	Actinomycetales	Microbacteriaceae	Microbacterium
279	AGCGAACGCTGGCGGCGTACTTAACACATGCAAGTCGAACGAGGATCTTCAGTGTAGCAATACATCGGAGGTCCTAGTGGCGCACGGGTGAGTAACACGTGGGTGACCTGCCCTTGAGCT-CCGCTCTTGGAGGGGCTCGCGGCCTATCAGCTAGTTGGCGGGGTAACGGCCCACCAAGGCTATGACGGGTAGCTGGTCTGAGAGGACGACCAGCCACACGGGGACTGAGACACGGCCCCG	0.101771	0.0168663	0.0471087	0.0468165	0.0641437	0.0252755	0.0483442	0.0263043	0.0533333	0.0184911	0.0732869	0.100654	0.0452591	0	0.0159566	0.0451365	0.0944287	0.0205973	0.073046	0.0311284	0.0333964	0.0581001	0.0671742	0.0380011	0.0336984	0.0140578	0.0355787	0.048479	0.0420566	0.0279603	0.0749885	0.0412906	Bacteria	un_Bacteria	un_Bacteria	un_Bacteria	un_Bacteria	un_Bacteria
280	GATGAACGCTAGCGGCAGGCCTAACACATGCAAGTCGAGGGGTAGGGGGTGCTTGCACCCCTGAGACCGGCGCACGGGTGCGGAACGCGTATGGAACCTGCCCCTGTCAGGGGAATAGCC-TCGGACAGGGATGGCCATGCGTACCATTAGCTTGATGGTGGGGTAACGGCCCACCATGGCAACGATGGTTAGGGGCCCTGAGAGGGGGATCCCCCACACTGGTACTGAGACACGGACCAG	0.0712396	0.0337325	0.0824402	0.0234082	0.0513149	0.0404408	0.0725163	0.0350723	0.0266667	0.0184911	0.0183217	0	0.0678887	0.0367579	0.0398915	0.0564207	0.0472144	0.0823893	0.0973947	0.077821	0.0445286	0.0484168	0.0223914	0.0760023	0.0252738	0.0492022	0.0592979	0.0242395	0.0420566	0.0629107	0.0346101	0.0412906	Bacteria	Bacteroidetes	Flavobacteria	Flavobacteriales	Flavobacteriaceae	Muricauda
281	AACGAACGTTAGCGGCGCGCCTAAGACATGCAAGTCGAGCGAGAAAGGGCTTCGGCCCCGGTAAAGCGGCGCACGGGTGAGTAACACGTAGGTTATCAACCCCCGAGTGGTGGATAACCC-GCGCTCGAGGATGAGCCTGCGGCCCATCAGGTAGTTGGCGGAGTAACAGCCCACCAAGCCTAAGACGGGTAGCTGGTCTGAGAGGATGAACAGCCACACTGGAACTGAGACACGGTCCAG	0	0	0.105995	0.031211	0.211674	0.0556061	0.346467	0.447172	0	0	0	0	0	0	0.0239349	0.0338524	0	0	0	0	0.0333964	0.0290501	0.0447828	0.012667	0.0084246	0.00702889	0.0711575	0.0969579	0.136684	0.097861	0.0807568	0.0766826	Bacteria	Proteobacteria	Deltaproteobacteria	Myxococcales	Polyangiaceae	un_Polyangiaceae
282	ATTGAACGCTGGCGGCATGCTTTACACATGCAAGTCGAGCGGCAGCGCGGGGGCAACCCTGGCGGCGAGCGGCGAACGGGTGAGTAATGCATCGGAACGTGTCCCGTAGTGGGGGATAAC-GTGCTAGGGGAGCGGCCGATGTCCGATTAGCTTGTTGGTGGGGTAACGGCCTACCAAGGCTGCGATCGGTAGCTGGTCTGAGAGGATGATCAGCCACACTGGGACTGAGACACGGCCCAG	0	0.0168663	0.0117772	0.0546192	0.0256575	0	0.00805737	0	0.0711111	0.0369822	0.0366435	0.0503271	0.0226296	0.018379	0.0398915	0.0564207	0.0472144	0.0205973	0.073046	0.124514	0.0890571	0.0581001	0.0447828	0.0380011	0.042123	0.0281156	0.0355787	0.0242395	0.0946273	0.0489305	0.0807568	0.0707839	Bacteria	Proteobacteria	Betaproteobacteria	un_Betaproteobacteria	un_Betaproteobacteria	un_Betaproteobacteria
283	GATGAACGCTAGCGGCAGGCCTAACACATGCAAGTCGAACGGTAACATGAGAGCTTGCTCTCGATGACGAGTGGCGCACGGGTGAGTAACACGTGTACAACTTACCTCTAACTGGGGCAT-GTGGTTAGAGATGGGTACGCGTCCTATTAGTTAGTTGGTGAGGTAACGGCTCACCAAGACTTCGATAGGTAGGGGTTCTGAGAGGAAGATCCCCCACACTGGTACTGAGACACGGACCAG	0.152656	0.185529	0.0942174	0.124844	0.0320718	0.0556061	0.0402868	0.0175362	0.08	0.0369822	0.0732869	0.0251636	0.0905182	0.128653	0.0398915	0.0677048	0	0.0411946	0.0243487	0.0466926	0.0333964	0.0193667	0.0447828	0.0253341	0.0084246	0.0351444	0.0118596	0.0242395	0.0105141	0.0279603	0	0.0235946	Bacteria	Bacteroidetes	Flavobacteria	Flavobacteriales	Cryomorphaceae	Cryomorpha
284	GACGAACGCTGGCGGCGCGCCTAACACATGCAAGTCGAACGGTGAACGGGGCTTCGGCCCTGGGATCAGTGGCGAACGGGTGCGTAACACGTGGGCAACCTGCCCCTCACTCTGGGATAC-CCGGTGAGGGATGGGCCCGCGGCCTATCAGCTTGTTGGTGGGGTAACGGCCCACCAAGGCGACGACGGGTAGCTGGTCTGAGAGGACGACCAGCCACACTGGGACTGAGATACGGCCCAG	0	0	0	0.0468165	0.0192431	0.0101102	0.0161147	0.0263043	0.0622222	0.0924556	0.10993	0.0503271	0.135777	0.0367579	0.0718047	0.0338524	0.0944287	0.0205973	0.073046	0.0466926	0.0556607	0.0677835	0.0223914	0.0443347	0.0252738	0.06326	0.0830171	0.0727185	0.0315424	0.0768908	0.0980618	0.0825813	Bacteria	Actinobacteria	Actinobacteria	un_Actinobacteria	un_Actinobacteria	un_Actinobacteria
285	AACGAACGCTGGCGGCATGCCTAACACATGCAAGTCGAACGAGACCTTCGGGTCTAGTGGCGCACGGGTGCGTAACGCGTGGGAATCTGCCCTTGGGTTCGGAACAACAGTTGGAAACGA-TCGCCCAGGGATGAGCCCGCGTAGGATTAGCTTGTTGGTGAGGTAAAAGCTCACCAAGGCGACGATCCTTAGCTGGTCTGAGAGGATGATCAGCCACACTGGGACTGAGACACGGCCCAG	0.0305312	0.0505988	0.0588859	0.0780275	0.0641437	0.0454959	0.0725163	0.0613766	0.00888889	0.0369822	0.0183217	0	0.0452591	0.0367579	0.0478698	0.112841	0.110167	0	0.0243487	0.0155642	0.0890571	0.0290501	0.0335871	0.0443347	0.0336984	0.0351444	0.0118596	0.048479	0.0210283	0.0699007	0.0576834	0.0471893	Bacteria	Proteobacteria	Alphaproteobacteria	Sphingomonadales	Sphingomonadaceae	Sphingomonas
286	AACGAACGCTGGCGGCAGGCTTAACACATGCAAGTCGAACGCACTCTTCGGAGTGAGTGGCAGACGGGTGAGTAACGCGTGGGAATCTACCCAGCTCTACGGAATAACCCAGGGAAACTT-TCGGAGTTGGATGAGCCCGCGTTGGATTAGCTAGTTGGTGGGGTAATGGCCTACCAAGGCGACGATCCATAGCTGGTCTGAGAGGATGATCAGCCACACTGGGACTGAGACACGGCCCAG	0.0203542	0.0337325	0.0235544	0.0234082	0	0.0050551	0.00805737	0.0175362	0.0177778	0.0184911	0.10993	0	0.0452591	0.0367579	0.0478698	0.0225683	0.0157381	0.123584	0.0486973	0.124514	0.0667928	0.00968335	0.0559785	0.0316676	0.0589722	0.06326	0.0948767	0.0848382	0.0841131	0.0768908	0.0749885	0.0825813	Bacteria	Proteobacteria	Alphaproteobacteria	Rhizobiales	Hyphomicrobiaceae	Devosia
287	ATTGAACGCTGGCGGCATGCTTTACACATGCAAGTCGAACGGCAGCACGGGGGCAACCCTGGTGGCGAGTGGCGAACGGGTGAGTAATGCATCGGAACGTATCTTCAAGTGGGGGATAAC-GCGCTTTTGGAGCGGCCGATGTCTGATTAGCTAGTTGGTGAGGTAAAGGCTTACCAAGGCTTCGATCAGTAGCTGGTCTGAGAGGACGACCAGCCACACTGGGACTGAGACACGGCCCAG	0.193365	0.168663	0.16488	0.210674	0.230917	0.252755	0.120861	0.175362	0.0177778	0.0184911	0	0	0	0.018379	0.0319132	0.0112841	0.0314762	0.0205973	0.0243487	0.0155642	0.0222643	0.00968335	0.0111957	0.0380011	0.0336984	0.0281156	0.0237192	0.0121197	0.0420566	0.0349504	0.0230734	0	Bacteria	Proteobacteria	Betaproteobacteria	Nitrosomonadales	Nitrosomonadaceae	Nitrosospira
288	GATGAACGCTAGCGGCAGGCCTAACACATGCAAGTCGAGGGGCATCGGGGAAAAGCTTGCTTTTCTGCCGGCGACCGGCGCACGGGTGCGCAACGCGTATGGAACCTGCCCTTTACAGGG-GCGGTAAAGGATGGCCATGCGTCCCATTAGCTAGTTGGTGCGGTAACGGCGCACCAAGGCCGCGATGGGTAGGGGCCCTGAGAGGGGGATCCCCCACACTGGTACTGAGACACGGACCAG	0.142479	0.151796	0.0588859	0.0390137	0.0577293	0.0101102	0.00805737	0.0175362	0.115556	0.203402	0.0549652	0.125818	0.203666	0.0918949	0.111696	0.0677048	0.0944287	0.102987	0.0243487	0.077821	0.122454	0.0968335	0.100761	0.0886693	0.042123	0.0984044	0.0474383	0.048479	0.0105141	0.0559206	0.0576834	0.100277	Bacteria	Bacteroidetes	Flavobacteria	Flavobacteriales	Flavobacteriaceae	Arenibacter
289	AACGAACGCTGGCGGCAGGCCTAACACATGCAAGTCGAACGTGAAGCCGCCTTCGGGCGGTGGAAAGTGGCAGACGGGTGAGTAACGCGTGGGAATCTACCCAGTGGTACGGAATAACCC-TCGCCATTGGATGAGCCCGCGTCGGATTAGCTTGTTGGTGGGGTAACGGCCCACCAAGGCGACGATCCGTAGCTGGTCTGAGAGGATGATCAGCCACACTGGGACTGAGACACGGCCCAG	0	0.0168663	0.0117772	0.0156055	0.0192431	0.0050551	0.0161147	0.0175362	0.0888889	0.0739645	0.0916086	0.0754907	0.0905182	0.0735159	0.0398915	0.0677048	0.0472144	0.061792	0.0973947	0.0466926	0.0333964	0.0677835	0.0223914	0.0380011	0.126369	0.0421733	0.0592979	0.0121197	0.0105141	0.0768908	0.0519151	0.0589866	Bacteria	Proteobacteria	Alphaproteobacteria	Rhizobiales	un_Rhizobiales	un_Rhizobiales
290	GATGAACGCTAGCGGCAGGCCTAACACATGCAAGTCGAACGGCAGCGGCACTTCGGTGGCCGGCGAGTGGCGGATGGGTGAGTAACGCGTATGCAACCTACCTTTCACAGTGGGATAGCC-TGGGTGAGAGATGGGCATGCGTTCTATTAGTTAGTTGGAGTGGTAACGGCACCCCAAGACCGCGATAGATAGGGGCCCTGAGAGGGGGATCCCCCACACTGGTACTGAGACACGGACCAG	0.17301	0.0843313	0.0706631	0.140449	0.128287	0.126378	0.0161147	0.0438404	0.124444	0.16642	0.183217	0.100654	0.203666	0.147032	0.0957396	0.0451365	0.0786906	0.144181	0.121743	0.0933852	0.0222643	0.0581001	0.0783699	0.114003	0.0505476	0.0702889	0.0474383	0.0727185	0.0315424	0.0768908	0.0634518	0.0589866	Bacteria	Bacteroidetes	Flavobacteria	Flavobacteriales	Flavobacteriaceae	Gelidibacter
291	ATTGAACGCTGGCGGCATGCCTTACACATGCAAGTCGAACGGCAGCACGGGGGCAACCCTGGTGGCGAGTGGCGAACGGGTGAGTAACATATCGGAACGTGCCCTGGAGTGGGGGATAAC-ATGCTCGTGGAGCGGCCGATATCTGATTAGCTAGTTGGTGGGGTAAAGGCCTACCAAGGCATCGATCAGTAGCTGGTCTGAGAGGACGACCAGCCACACTGGGACTGAGACACGGCCCAG	0.101771	0.101198	0.0706631	0.179463	0.0833868	0.151653	0.0483442	0.157826	0.0711111	0.0924556	0.0549652	0.0754907	0.0452591	0.110274	0.0159566	0.0338524	0.0472144	0.061792	0.0243487	0.0622568	0.0222643	0.0677835	0.0223914	0.0443347	0.0084246	0.0421733	0.0474383	0.0848382	0.0210283	0.0699007	0.0461467	0.0117973	Bacteria	Proteobacteria	Betaproteobacteria	Burkholderiales	Oxalobacteraceae	un_Oxalobacteraceae
292	GACGAACGCTGGCGGCGTGCTTAACACATGCAAGTCGAGCGGAAAGGCTCCTTCGGGGGTACTCGAGCGGCGAACGGGTGAGTAACACGTGAGTAATCTGCCCTTCACTTGGGGATAACC-TCGGTGGAGGATGTGCTCGCGGCCTATCAGCTTGTTGGTGGGGTAATGGCCCACCAAGGCTTCGACGGGTAGCCGGCCTGAGAGGGTGACCGGCCACACTGGGACTGAGACACGGCCCAG	0.162833	0.0843313	0.0353315	0.117041	0.0256575	0.0909918	0.0725163	0.0876808	0.0355556	0.0184911	0.0366435	0.0251636	0	0.018379	0.0239349	0.0338524	0	0	0.0243487	0.077821	0.0111321	0.00968335	0	0.00633352	0.0084246	0.06326	0.0474383	0.0605987	0.0105141	0.0419404	0.0634518	0.0412906	Bacteria	Actinobacteria	Actinobacteria	Actinomycetales	Nocardioidaceae	Nocardioides
293	GACGAACGCTGGCGGCGTGCTTAACACATGCAAGTCGAACGAGGTTCAGCCGATCCTTCGGGGGAAGCGAAAATCTAGTGGCGAACGGGTGCGTAACACGTGAGAAACCTGCCCCGGACT-GCGGTCTGGGAGGGTCTCGCGGCCTATCAGCTAGTTGGTGAGGTAACGGCTCACCAAGGCATCGACGGGTAGCTGGTCTGAGAGGATGATCAGCCACACTGGGACTGAGACACGGCCCAG	0	0	0.0471087	0.0390137	0.0256575	0.0404408	0.0564016	0.0175362	0	0.0369822	0.0366435	0	0.0452591	0	0.0319132	0.0564207	0.0472144	0.0205973	0	0.0311284	0.0667928	0.0484168	0.0223914	0.0380011	0.042123	0.0562311	0.0948767	0.0605987	0.115656	0.0489305	0.0692201	0.0412906	Bacteria	Actinobacteria	Actinobacteria	Acidimicrobiales	Acidimicrobiaceae	Ilumatobacter
294	AACGAACGCTGGCGGCATGCCTAACACATGCAAGTCGAACGAGACCTTCGGGTCTAGTGGCGCACGGGTGCGTAACGCGTGGGAATCTGCCCTTGGGTTCGGGATAACAGTTGGAAACGA-TCGCCCAGGGATGAGCCCGCGTAGGATTAGCTTGTTGGTGAGGTAAGAGCTCACCAAGGCGACGATCCTTAGCTGGTCTGAGAGGATGATCAGCCACACTGGGACTGAGACACGGCCCAG	0.0203542	0.0505988	0.0235544	0.031211	0.0128287	0.0404408	0.0322295	0.0526085	0.0711111	0.0369822	0.0549652	0.0754907	0.0452591	0.0918949	0.0478698	0.0564207	0.0314762	0.061792	0	0.0466926	0.0667928	0.0290501	0.134348	0.0380011	0.0673968	0.0351444	0.0355787	0.048479	0.0210283	0.0279603	0.0576834	0.0648853	Bacteria	Proteobacteria	Alphaproteobacteria	Sphingomonadales	Sphingomonadaceae	Sphingomonas
295	GATGAACGCTAGCGGGAGGCCTAATACATGCAAGTCGAGGGGTAACAGGGTCTTCGGACCGCTGACGACCGGCGCACGGGTGAGTAACGCGTACACAACCTACCTTTAAGAGGGGGATAG-GCGCTTAAAGATGGGTGTGCGTCCCATTAGCTAGTTGGTGAGGTAACGGCTCACCAAGGCGATGATGGGTAGGGGGCGTGAGAGCGTGGCCCCCCACACGGGTACTGAGACACGGACCCG	0.0305312	0.0337325	0.0588859	0.0156055	0.0192431	0.0353857	0.00805737	0.0263043	0.08	0.0369822	0	0.0251636	0.113148	0.0551369	0.0718047	0.101557	0.110167	0.0411946	0.0243487	0.0155642	0.0333964	0.0581001	0.0223914	0.0506682	0.0673968	0.0140578	0.0118596	0.0121197	0.0210283	0.0489305	0.0346101	0.0294933	Bacteria	Bacteroidetes	un_Bacteroidetes	un_Bacteroidetes	un_Bacteroidetes	un_Bacteroidetes
296	GACGAACGCTGGCGGCGTGCTTAACACATGCAAGTCGAACGAGATCCATTCAGTAGCAATACTGATGAAGATCTAGTGGCGAACGGGTGCGTAACACGTGAGGAACTTGTCCCGGTCTCT-CTGGATCGGGAGAGCCTCGCGGCCTATCAGCTTGTTGGTGGGGTAATGGCCTACCAAGGCATCGACGGGTAGCTGGTCTGAGAGGATGATCAGCCACACTGGGACTGAGACACGGCCCAG	0.0101771	0.0337325	0	0.00780275	0.0449006	0.0353857	0.00805737	0.00876808	0.0266667	0.0184911	0.0366435	0.0503271	0.0905182	0.018379	0.0319132	0.0902731	0.0786906	0	0	0.0155642	0.0333964	0.0677835	0.0223914	0.0570017	0.0758214	0.0351444	0.106736	0.0969579	0.0946273	0.0349504	0.0519151	0.0530879	Bacteria	Actinobacteria	Actinobacteria	un_Actinobacteria	un_Actinobacteria	un_Actinobacteria
297	AGTGAACGCTGGCGGTAGGCCTAACACATGCAAGTCGAACGGCAGCACGAGAGAGCTTGCTCTCTTGGTGGCGAGTGGCGGACGGGTGAGGAATACATCGGAATCTACCCTGTCGTGGGG-ACGCGATTGGATGAGCCGATGTCGGATTAGCTTGTTGGCGGGGTAAAAGCCCACCAAGGCGACGATCCGTAGCTGGTCTGAGAGGATGATCAGCCACACTGGGACTGAGACACGGCCCAG	0.0712396	0.067465	0.294429	0.210674	0.173188	0.374077	0.0805737	0.0964489	0	0.0184911	0.0183217	0.0251636	0.0678887	0.018379	0.0558481	0.0677048	0.0157381	0.205973	0.0486973	0.0933852	0.0890571	0.0968335	0.145544	0.0633352	0.151643	0.0843467	0.0592979	0.0727185	0.147198	0.111841	0.0980618	0.0530879	Bacteria	Proteobacteria	Gammaproteobacteria	Xanthomonadales	Xanthomonadaceae	Luteimonas
298	ATTGAACGCTGGCGGCATGCCTAACACATGCAAGTCGAACGGTAACAGGCCCTTCGGGGTGCTGACGAGTGGCGGACGGGTGAGTAATACGTAGGAATCTGCCCAGTAGTGGGGGATAAC-GCGCTATTGGATGAGCCTACGTCGGATTAGCTTGTTGGTGAGGTAAAGGCTCACCAAGGCGACGATCCGTAGCTGGTCTGAGAGGACGATCAGCCACACTGGGACTGAGACACGGCCCAG	0.0101771	0.0168663	0.0471087	0.0234082	0.0705581	0.0404408	0.249778	0.131521	0	0	0	0.0251636	0	0.018379	0.0239349	0.0338524	0.0314762	0	0.0486973	0.0311284	0.0222643	0.0387334	0.0335871	0.0190006	0.0084246	0.0351444	0.0592979	0.048479	0.0841131	0.0349504	0.0403784	0.0707839	Bacteria	Proteobacteria	Gammaproteobacteria	un_Gammaproteobacteria	un_Gammaproteobacteria	un_Gammaproteobacteria
299	AACGAACGCTGGCGGCAGGCTTAACACATGCAAGTCGAGCGCCCCGCAAGGGGAGCGGCAGACGGGTGAGTAACGCGTGGGGATCTGCCTAGTGGTACGGAACAACCCGGGGAAACTCGG-TCGCCATTAGATGAACCCGCGTCTGATTAGCTTGTTGGTGAGGTAACGGCTCACCAAGGCGACGATCAGTAGCTGGTCTGAGAGGATGATCAGCCACACTGGGACTGAGACACGGCCCAG	0.0305312	0.0168663	0.0235544	0.0390137	0.0384862	0.0303306	0.0725163	0.0876808	0.0711111	0.0184911	0.0366435	0.0503271	0.0226296	0	0.0558481	0.0112841	0.0629525	0.0823893	0.0243487	0.0933852	0.077925	0.0677835	0.0111957	0.0506682	0.0589722	0.0351444	0.0592979	0.0969579	0.0315424	0.0629107	0.0922935	0.0648853	Bacteria	Proteobacteria	Alphaproteobacteria	Rhizobiales	un_Rhizobiales	un_Rhizobiales
300	AGCGAACGCTGGCGGCAGGCCTAACACATGCAAGTCGAGCGCCCCGCAAGGGGAGCGGCAGACGGGAGAGTAACACGTGGGAACGTACCCTTCAGTTCGGAACAACCCAGGGAAACTTGG-TCGCTGAGGGATCGGCCCGCGTCTGATTAGCTAGTTGGTGGGGTAATGGCCCACCAAGGCGACGATCAGTAGCTGGTCTGAGAGGATGATCAGCCTCACTGGGACTGAGACACGGCCCAG	0.0101771	0.0168663	0.0117772	0.031211	0.0256575	0.0101102	0.0564016	0.0613766	0.0177778	0.0184911	0.0732869	0.0503271	0.0678887	0.147032	0.0877613	0.0677048	0.0157381	0	0.0486973	0.0311284	0.0667928	0.0484168	0.0559785	0.0253341	0.0336984	0.0351444	0.0711575	0.0848382	0.0525707	0.111841	0.0692201	0.0766826	Bacteria	Proteobacteria	Alphaproteobacteria	Rhizobiales	un_Rhizobiales	un_Rhizobiales
301	GATGAACGCTAGCGGCAGGCCTAATACATGCAAGTCGGACGGTATTCCCCCTTCGGGGGGGAGAGAGTGGCGCACGGGTGCGTAACGCGTATGCAACCTGCCCCTTACTGGGGGATAGCC-CCGGTAAGGGATGGGCATGCGTAGGATTAGCTAGTTGGCGGTGTAACGGACCACCAAGGCTTCGATCCTTAGGGGTTCTGAGAGGAAGGTCCCCCACACTGGCACTGAGATACGGGCCAG	0.183187	0.067465	0.0706631	0.0390137	0.0192431	0.0050551	0.00805737	0.0175362	0.0711111	0.0739645	0.0916086	0.0503271	0.0905182	0.0735159	0.0638264	0.0677048	0.0157381	0.102987	0.146092	0.077821	0.0667928	0.00968335	0.0223914	0.0506682	0.0252738	0.0421733	0.0237192	0	0	0.0139801	0.0288417	0.0117973	Bacteria	Bacteroidetes	Sphingobacteria	Sphingobacteriales	Cyclobacteriaceae	un_Cyclobacteriaceae
302	CCTGAACGCTGGCGGCGTGGCTAAGACATGCAAGTCGCACGCATGTAGCAATACATGAGTGGCGAACGGGTGAGTAATGAATCGCTAATGTACCCTGGACTCTGGGATAGCCAGCCGAAA-CCGGTCTGGGATCAGGCGATTTCGTATCAGCTTGTTGGTGAGGTAATGGCTCACCAAGGCGACGACGCGTAGCCGGACTGAGAGGTTGGCCGGCCACATCGGGACTGAGACACTGCCCGG	0.122125	0.0843313	0.0353315	0.0546192	0.10263	0.0454959	0.0322295	0.122753	0.0266667	0.0739645	0.0366435	0.100654	0.0905182	0.0551369	0.0877613	0.0789889	0.141643	0.102987	0.073046	0.0466926	0.0333964	0.0774668	0.0783699	0.0506682	0.084246	0.0421733	0.0592979	0.0848382	0.0841131	0.0489305	0.0576834	0.0530879	Bacteria	Planctomycetes	un_Planctomycetes	un_Planctomycetes	un_Planctomycetes	un_Planctomycetes
303	ATTGAACGCTGGCGGCATGCTTTACACATGCAAGTCGAACGGGGTGGAGGGGCAACTCTCCATTCAGTGGCGAACGGGTGAGTAATGCATCGGAACGTGTCCCGTAGTGGGGGATAACCC-GTGCTAGGGGGGCGGCCGATGTCCGATTAGGTTGTTGGTGGGGTAATGGCCTACCAAGCCTGCGATCGGTAGCTGGTCTGAGAGGATGATCAGCCACACTGGGACTGAGACACGGCCCAG	0	0.0168663	0.0117772	0.0390137	0.0256575	0.0050551	0.0322295	0	0.0355556	0.0184911	0.0183217	0.0251636	0.0452591	0.018379	0.0319132	0.0564207	0.0472144	0.061792	0	0.0622568	0.0556607	0.0387334	0.0559785	0.0253341	0.0336984	0.0562311	0.0948767	0.0727185	0.0946273	0.0699007	0.0692201	0.0294933	Bacteria	Proteobacteria	Betaproteobacteria	un_Betaproteobacteria	un_Betaproteobacteria	un_Betaproteobacteria
304	GATGAACGCTAGCGGCAGGCCTAACACATGCAAGTCGAGGGGCAGCATTTCCAGCTTGCTGGAAGATGGCGACCGGCGCACGGGTGCGCAACGCGTATAGAATCTGCCTTGCACTGGGGA-ACGGTGCAAGATGACTATGCGTCCCATTAGTTTGTTGGCAGGGTAACGGCCTACCAAGACGTCGATGGGTAGGGGCCCTGAGAGGGGGATCCCCCACACTGGTACTGAGACACGGACCAG	0.0508854	0.0505988	0.0353315	0.062422	0.0641437	0.0808816	0.0644589	0.0350723	0.0355556	0.0184911	0.0183217	0.0754907	0.0678887	0.0367579	0.0319132	0.0451365	0.0472144	0.0411946	0	0.0155642	0.0333964	0.0290501	0.0111957	0.0443347	0.042123	0.0562311	0.0118596	0.0363592	0.0525707	0.0279603	0.00576834	0.0530879	Bacteria	Bacteroidetes	Flavobacteria	Flavobacteriales	Flavobacteriaceae	Arenibacter
305	AACGAACGTTAGCGGCGCGCTTAACACATGCAAGTCGAGCGAGAAAGGGTTTCGGCCCCGGTAAAGCGGCGCACGGGTGAGTAATACGTAGGTAATCTGCCCCCAGGTGGTGGATAACCC-GTGCCAGGGGATGAGCCTACGGCCCATCAGCTTGTTGGTAGGGTAACGGCCTACCAAGGCGAAGACGGGTAGCTGGTCTGAGAGGATGATCAGCCACACTGGAACTGAGACACGGTCCAG	0.0610625	0.0337325	0.0471087	0.101436	0.0320718	0.0353857	0.0241721	0.0263043	0.0533333	0.0554734	0.0183217	0.0754907	0.0226296	0.018379	0.0718047	0.0225683	0.0944287	0.061792	0.0486973	0.0155642	0.0333964	0.0387334	0.0447828	0.0633352	0.0336984	0.0421733	0.0355787	0.0242395	0.0210283	0.090871	0.0288417	0.0117973	Bacteria	Proteobacteria	Deltaproteobacteria	Myxococcales	Polyangiaceae	Sorangium
306	ATTGAACGCTGGCGGCATGCTTTACACATGCAAGTCGAACGGTAACGCGGGCTTCGGCCTGGCGACGAGTGGCGAACGGGTGAGTAATACATCGGAACGTGCCCAGGAGTGGGGGATAGC-GCGCTCATGGAGCGGCCGATGTCGGATTAGCTAGTTGGTGGGGTAAAGGCCTACCAAGGCGACGATCCGTAGCTGGTCTGAGAGGATGATCAGCCACACTGGGACTGAGACACGGCCCAG	0.0712396	0.0843313	0.0235544	0.0156055	0.0320718	0.0151653	0.0161147	0.00876808	0.0533333	0.0554734	0.0732869	0.0251636	0.0452591	0.147032	0.0239349	0.0338524	0.0157381	0.0823893	0.0486973	0.0622568	0.0222643	0.0677835	0.0223914	0.0506682	0.0336984	0.0281156	0.0355787	0.0242395	0.0315424	0.0419404	0.0346101	0.0530879	Bacteria	Proteobacteria	Betaproteobacteria	un_Betaproteobacteria	un_Betaproteobacteria	un_Betaproteobacteria
307	AACGAACGCTGGCGGCAGGCTTAACACATGCAAGTCGAACGCCCCGCAAGGGGAGTGGCAGACGGGTGAGTAACGCGTGGGAATCTACCCAGCTCTACGGAATAACCCAGGGAAACTTGG-TCGGAGTTGGATGAGCCCGCGTTGGATTAGCTAGTTGGTGGGGTAATGGCCTACCAAGGCGACGATCCATAGCTGGTCTGAGAGGATGATCAGCCACACTGGGACTGAGACACGGCCCAG	0.0101771	0	0.0117772	0	0.00641437	0.0050551	0.0322295	0.0350723	0	0.0369822	0.0183217	0.100654	0	0.018379	0.0239349	0.0451365	0.0472144	0.0205973	0.0486973	0.0622568	0.0445286	0.0581001	0.100761	0.0570017	0.0589722	0.0281156	0.106736	0.0969579	0.136684	0.097861	0.0749885	0.0471893	Bacteria	Proteobacteria	Alphaproteobacteria	Rhizobiales	Hyphomicrobiaceae	Devosia
308	GACGAACGCTGGCGGCGTGCTTAACACATGCAAGTCGAGCGGTAAGGCCCCTTCGGGGGTACACGAGCGGCGAACGGGTGAGTAACACGTGAGCAACCTACCCTCAACTTTGGGATAAGC-GCGGTTGGGGATGGGCTCGCGGCCTATCAGCTTGTTGGTGGGGTAATGGCCTACCAAGGCTTCGACGGGTAGCCGGCCTGAGAGGGCGACCGGCCACACTGGGACTGAGACACGGCCCAG	0.0203542	0.067465	0.0117772	0.093633	0.0641437	0.101102	0.0161147	0.0964489	0.0444444	0.0369822	0.0916086	0.0251636	0.0452591	0.0367579	0.0239349	0.0789889	0.0157381	0.0205973	0.0486973	0.0311284	0.0445286	0.0387334	0.0223914	0.0443347	0.0758214	0.0913756	0.0830171	0.0242395	0	0.118831	0.0980618	0.106176	Bacteria	Actinobacteria	Actinobacteria	Actinomycetales	Nocardioidaceae	Kribbella
309	AACGAACGCTGGCGGCATGCCTAACACATGCAAGTCGAACGGAGGTCGGGGCTTCGGCTCCGGCCTTAGTGGCGAACGGGTGAGTAACGCGTGGAGACCTGCCCTTTAGTGGGGGATAAC-GCGCTAGAGGAGGGTTCCGCGTCCGATTAGCTAGTTGGTGGGGTAACGGCCTACCAAGGCGACGATCGGTAGCTGGTCTGAGAGGATGATCAGCCACACTGGGACTGAGACACGGCCCAG	0.0407083	0.0505988	0.141326	0.0858302	0.14753	0.0808816	0.161147	0.113985	0.0266667	0.0369822	0	0.0503271	0.0452591	0.018379	0.0398915	0.0564207	0.0629525	0.0205973	0.0486973	0.0466926	0.0222643	0.0484168	0.0447828	0.114003	0.042123	0.0140578	0.130455	0.0727185	0.0630848	0.090871	0.0692201	0.0825813	Bacteria	Proteobacteria	Alphaproteobacteria	Rhodospirillales	Rhodospirillaceae	un_Rhodospirillaceae
310	AATCAACGCTGGCGGCGTGCCTCAGACATGCAAGTCGAACGAGAAAGTCCCCTTCGGGGGATGAGTAAAGTGGCGCACGGGTGAGTAACACGTAGGTAATCTACCTTCGGGTGGGGAATA-GCGCCTGAAGAGGAGCCTGCGGCGGATTAGCTAGTTGGTAGGGTAACGGCTTACCAAGGCGACGATCCGTAACCGGCCTGAGAGGGCGGTCGGTCACACTGACACTGACATACGGGTCAG	0	0	0	0.031211	0.0320718	0.0353857	0.00805737	0.0263043	0.0622222	0.0739645	0.0549652	0.0754907	0	0.0367579	0.0079783	0.0451365	0.0157381	0.0205973	0.0243487	0.0933852	0.0667928	0.0387334	0.0335871	0.0253341	0.0673968	0.0281156	0.0237192	0.0605987	0.0420566	0.00699007	0.0403784	0.0648853	Bacteria	Acidobacteria	Acidobacteria_Gp4	Acidobacteria_Gp4	Acidobacteria_Gp4	Gp4
311	GATAAACGCTGGCGGCGTGCATGAGACATGCAAGTCGAACGGACACTTGGGGCTTGCTCCAAGTGTTAGTGGCGGACGGCTGAGTAACGCGTAGGTGACCTGCCCCGAAGTGGGGAATAA-GCGCTTCGGGAGGGGCCTGCGTCCGATTAGCTCGTTGGTGGGGTAACGGCTCACCAAGGCGACGATCGGTAGGTGGTCTGAGAGGACGATCACCCAGACTGGGACTGAGACACGGCCCAG	0.0203542	0.0505988	0.129549	0.0858302	0.0641437	0.0859367	0.0966884	0.113985	0.0622222	0.0554734	0.0732869	0.100654	0.0452591	0.0367579	0.0957396	0.0564207	0.0314762	0.061792	0.121743	0.0466926	0.111321	0.183984	0.0671742	0.0823358	0.0084246	0.0562311	0.0830171	0.0605987	0.0841131	0.153782	0.0807568	0.0884799	Bacteria	un_Bacteria	un_Bacteria	un_Bacteria	un_Bacteria	un_Bacteria
312	GACGAACGCTGGCGGCGTGCTTAACACATGCAAGTCGAACGGTAAGGCCCTTCGGGGTACACGAGTGGCGAACGGGTGAGTAACACGTGGGTGATCTGCCCTGCACTTTGGGATAAGCCT-GCGGTGTGGGATGGGCCCGCGGCCTATCAGCTTGTTGGTGGGGTGATGGCCTACCAAGGCGACGACGGGTAGCCGGCCTGAGAGGGTGTCCGGCCACACTGGGACTGAGATACGGCCCAG	0.0203542	0.0505988	0.0117772	0.031211	0.0128287	0.0101102	0.0241721	0.0175362	0.0533333	0.0369822	0.0732869	0.0754907	0.0226296	0	0.079783	0.0338524	0.0314762	0.0205973	0.073046	0.0311284	0	0.0677835	0.0447828	0.012667	0.0336984	0.0210867	0.0592979	0.0848382	0.0210283	0.0629107	0.0403784	0.0766826	Bacteria	Actinobacteria	Actinobacteria	Actinomycetales	Mycobacteriaceae	Mycobacterium
313	AACGAACGCTGGCGGCAGGCCTAACACATGCAAGTCGAGCGCACCTTCGGGTGAGCGGCGGACGGGTGAGTATCGCGTGGGAACGTGCCCTTCTCTACGGAATAGTCCTGGGAAACTGGG-TCGGAGAAGGATCGGCCCGCGTTGGATTAGGTAGTTGGTGGGGTAATGGCTCACCAAGCCGACGATCCATAGCTGGTTTGAGAGGATGATCAGCCACACTGGGACTGAGACACGGCCCAG	0.132302	0.0843313	0.0117772	0.031211	0.0384862	0.0101102	0.0402868	0.0175362	0.0711111	0.0924556	0.0732869	0.125818	0.0678887	0.0551369	0.0478698	0.0225683	0.0314762	0.0205973	0	0.108949	0.0445286	0.00968335	0.0447828	0.0253341	0.0589722	0.06326	0.0355787	0.0242395	0.0210283	0.0559206	0.0461467	0.0471893	Bacteria	Proteobacteria	Alphaproteobacteria	Rhodobacterales	Rhodobacteraceae	Paracoccus
314	ATTGAACGCTGGCGGCAGGCCTAACACATGCAAGTCGAGCGCGAAAGTTCTTCGGAATGAGTAGAGCGGCGGACGGGTGAGTAACGCGTGGGAATCTGCCCAGTAGTGGGGGATAACGTT-TCGCTATTGGATGAGCCCGCGTCGGATTAGCTAGTTGGTAGGGTAATGGCCTACCAAGGCGACGATCCGTAACTGGTCTGAGAGGATGATCAGTCACACTGGAACTGAGACACGGTCCAG	0.193365	0.151796	0.0824402	0.132647	0.0769724	0.0758265	0.0161147	0.0175362	0.0177778	0.0369822	0.0549652	0.0251636	0	0.018379	0.0319132	0.0564207	0.0314762	0.0411946	0.0486973	0.0155642	0.0111321	0.0484168	0	0.0380011	0.0084246	0	0	0	0	0.0139801	0.00576834	0.00589866	Bacteria	Proteobacteria	Gammaproteobacteria	Pseudomonadales	Pseudomonadaceae	Cellvibrio
315	GATGAACGCTAGCGGCAGGCTTAATACATGCAAGTCGAGGGGCAGCACAGGTAGCAATACTGGGTGGCGACCGGCAAACGGGTGAGGAACACGTACGCAACCTCCCTTCAAATGAGGAAT-GCGTTTGAAGATGGGCGTGCGCCTGATTAGGTAGTTGGTAAGGTAACGGCTTACCAAGCCTGCGATCAGTAACTGGTGTGAGAGCACGACCAGTCACACGGGCACTGAGACACGGGCCCG	0.0915937	0.13493	0.0824402	0.117041	0.0449006	0.0808816	0.0161147	0.0613766	0.0177778	0.0554734	0.0183217	0.0503271	0.0226296	0.0735159	0.0239349	0.101557	0.0314762	0.061792	0.0243487	0.0311284	0.0556607	0.0193667	0.0447828	0.0316676	0.084246	0.0351444	0	0	0.0210283	0.0209702	0.0403784	0.0117973	Bacteria	Bacteroidetes	Sphingobacteria	Sphingobacteriales	Chitinophagaceae	Niastella
316	AACGAACGCTGGCGGCATGCCTAACACATGCAAGTCGAACGAAGGCTTCGGCCTTAGTGGCGCACGGGTGCGTAACGCGTGGGAATCTGCCCTCAGGTACGGAATAACTCAGGGAAACTT-TCGCCTGAGGATGAGCCCGCGTCGGATTAGCTAGTTGGTGAGGTAAAGGCTCACCAAGGCGACGATCCGTAGCTGGTCTGAGAGGATGATCAGCCACACTGGGACTGAGACACGGCCCAG	0.0407083	0.101198	0.0824402	0.0702247	0.0705581	0.0808816	0.0725163	0.0526085	0.0977778	0.0554734	0.0732869	0.0251636	0.0226296	0.0367579	0.0478698	0.124125	0.0944287	0.0823893	0.073046	0.0466926	0.077925	0.0677835	0.0895656	0.0190006	0.0673968	0.0492022	0.0355787	0.0363592	0.0315424	0.0629107	0.0519151	0.0471893	Bacteria	Proteobacteria	Alphaproteobacteria	Sphingomonadales	Sphingomonadaceae	Sphingomonas
317	ATTGAACGCTGGCGGCATGCCTTACACATGCAAGTCGAACGGCAGCACGGGGGCAACCCTGGTGGCGAGTGGCGAACGGGTGAGTAATACATCGGAACGTGTCCAGTAGTGGGGGATAGC-GCGCTATTGGAGCGGCCGATGTCAGATTAGGTTGTTGGTGGGGTAAAGGCTCACCAAGCCGACGATCTGTAGCTGGTCTGAGAGGACGACCAGCCACACTGGGACTGAGACACGGCCCAG	0.0305312	0.0505988	0.0471087	0.156055	0.121873	0.116267	0.0644589	0.18413	0.0177778	0	0	0.0251636	0.0226296	0	0.0478698	0	0.0157381	0.0823893	0.0243487	0.0466926	0.0890571	0.135567	0.0895656	0.0316676	0.10952	0.0492022	0.0711575	0.0727185	0.136684	0.0699007	0.0519151	0.0235946	Bacteria	Proteobacteria	Betaproteobacteria	Burkholderiales	un_Burkholderiales	un_Burkholderiales
318	ATTGAACGCTGGCGGCATGCCTTACACATGCAAGTCGAACGGCAGCGCGGGAGCAATCCTGGCGGCGAGTGGCGAACGGGTGAGTAATATATCGGAACGTGCCCTAGAGTGGGGGATAAC-ATGCTCATGGAGCGGCCGATATCTGATTAGCTAGTTGGTGGGGTAAAAGCCCACCAAGGCGACGATCAGTAGCTGGTCTGAGAGGACGACCAGCCACACTGGGACTGAGACACGGCCCAG	0.0610625	0.0168663	0.270875	0.062422	0.0577293	0.0404408	0.0483442	0.0526085	0.00888889	0.0184911	0	0	0.0226296	0	0.167544	0.0112841	0.0157381	0	0	0.0622568	0	0.00968335	0	0	0.0168492	0.0281156	0.0355787	0.0242395	0	0.00699007	0.0230734	0.00589866	Bacteria	Proteobacteria	Betaproteobacteria	Burkholderiales	Oxalobacteraceae	un_Oxalobacteraceae
319	GATGAACGCTAGCGGCAGGCCTAACACATGCAAGTCGAGGGGCAGCACGATTGAGCTTGCTTAATTGGTGGCGACCGGCGCACGGGTGCGTAACGCGTATGCAACCTACCCTGTACTGAG-ACGGTACAGGATGGGCATGCGTCCTATTAGCTAGATGGTAAGGTAACGGCTTACCATGGCAACGATAGGTAGGGGGCCTGAGAGGGTGATCCCCCACACTGGTACTGAGACACGGACCAG	0.183187	0.303593	0.117772	0.0546192	0.0705581	0.0151653	0.0161147	0.00876808	0.0444444	0.0184911	0	0.0754907	0.113148	0.018379	0.0159566	0.0451365	0.0472144	0.0205973	0.0243487	0.0155642	0.0333964	0.0290501	0.0447828	0.012667	0.0084246	0.0281156	0.0237192	0.0363592	0.0105141	0.0209702	0.0230734	0.00589866	Bacteria	Bacteroidetes	Flavobacteria	Flavobacteriales	Cryomorphaceae	un_Cryomorphaceae
320	GATGAACGCTAGCGGCAGGCCTAATACATGCAAGTCGAACGGTAAATAGATCAGCAATGGTCTATGAGAGTGACGCACGGGTGCGTAACACGTATGCAACCTACCCTTTACAGGAGTATA-GAGGTAAAGGATGGGCATGCGTCTGATTAGCTAGTTGGTAGTGTAACGGACTACCAAGGCGATGATCAGTAGGGGAACTGAGAGGTTGATCCCCCACACTGGCACTGAGATACGGGCCAG	0	0	0.0235544	0	0.0320718	0.0303306	0.0564016	0.0438404	0.0177778	0	0.0183217	0	0	0	0.0319132	0.0112841	0.0157381	0.061792	0	0	0.0222643	0.00968335	0.0559785	0.0253341	0.0252738	0.0421733	0.0474383	0.048479	0.073599	0.097861	0.0922935	0.117973	Bacteria	Bacteroidetes	Bacteroidetes_i.s.	Bacteroidetes_i.s.	Bacteroidetes_i.s.	Ohtaekwangia
321	AGCGAACGCTGGCGGCAGGCTTAACACATGCAAGTCGAACGCTCGTAGCAATACGAGAGTGGCAGACGGGTGAGTAACACGTGGGAACGTACCTTTCGGTTCGGAATAACCCGGGGAAAC-TCGCCGAAAGATCGGCCCGCGTCGGATTAGCTAGTTGGTGAGGTAAAGGCTCACCAAGGCAATGATCCGTAGCTGGTCTGAGAGGACGATCAGCCACACTGGGACTGAGACACGGCCCAG	0	0	0	0	0	0	0	0.00876808	0.0266667	0.0369822	0.0183217	0	0.0226296	0	0.0079783	0.0451365	0.0157381	0.0205973	0	0.0311284	0.0556607	0.0677835	0.0447828	0.0380011	0.0252738	0.0492022	0.118596	0.169676	0.073599	0.125821	0.126904	0.0648853	Bacteria	Proteobacteria	Alphaproteobacteria	Rhizobiales	un_Rhizobiales	un_Rhizobiales
322	AGCGAACGTTAGCGGGAGGCTTAACACATGCAAGTCGAGCGAGAAAAGGGCTTCGGCCCCCAGTACAGCGGCGGACGGGTGAGTAACACGTGGATAATCTGCCCTTTGGCGGGGGACAAC-TCACCGAAGGATGAGTCCGCGTTGCATCAGCTTGTTGGTGGGGTAAAGGCCTACCAAGGCAAAGACGCATAGCTGGTCTGAGAGGATGATCAGCCACACTGGGACTGAGATACGGCCCAG	0	0	0.0235544	0.0156055	0.0962155	0.0151653	0.507614	0.0876808	0	0	0	0	0	0	0.0079783	0.0112841	0	0.0205973	0	0.0155642	0.0445286	0.0387334	0.0111957	0.012667	0	0.00702889	0.0830171	0.0848382	0.0841131	0.0349504	0.0115367	0.017696	Bacteria	Proteobacteria	Deltaproteobacteria	Myxococcales	un_Myxococcales	un_Myxococcales
323	GACGAACGCTGGCGGCGTGCTTAACACATGCAAGTGGAGCGACGAACCGGGGCTTGCCCCGGGGCAGAGCCGCGAACGGGTGAGTAACACGTGGGTAACCCACCCCGATGACCGGGACAA-CCGCATCGGGACGGGCCCGCGGCCCATTAGCTTGTTGGTGGGGTAACGGCCTACCAAGGCGACGATGGGTAGCTGGTCTGAGAGGACGATCAGCCACACTGGGACTGAGACACGGCCCAG	0.0508854	0.0843313	0.153103	0.124844	0.0641437	0.121322	0.0725163	0.22797	0.0355556	0.0369822	0.0183217	0.0503271	0.0452591	0.018379	0.0079783	0.0338524	0.0157381	0	0.0486973	0.0155642	0.0111321	0.0290501	0.0335871	0.00633352	0.0084246	0.06326	0.0118596	0.0363592	0	0.0349504	0.0576834	0.0648853	Bacteria	Actinobacteria	Actinobacteria	Solirubrobacterales	Solirubrobacteraceae	Solirubrobacter
324	ATTGAACGCTGGCGGCATGCCTTACACATGCAAGTCGAACGGCAGCACGGGAGCAATCCTGGTGGCGAGTGGCGAACGGGTGAGTAATACATCGGAACGTGTCCAGTAGTGGGGGATAGC-GCGCTATTGGAGCGGCCGATGTCAGATTAGCTAGTTGGCGGGGTAAAGGCCCACCAAGGCGACGATCTGTAGCTGGTCTGAGAGGACGACCAGCCACACTGGGACTGAGACACGGCCCAG	0.0203542	0.0843313	0.0706631	0.093633	0.109044	0.0909918	0.0886311	0.0438404	0	0.0369822	0.0183217	0.0754907	0.0226296	0.0367579	0.0239349	0.0225683	0.0472144	0	0	0.0622568	0.0333964	0.00968335	0	0.0190006	0.0252738	0.0281156	0.0237192	0.0121197	0.0315424	0.0279603	0.00576834	0.035392	Bacteria	Proteobacteria	Betaproteobacteria	Burkholderiales	Oxalobacteraceae	Oxalicibacterium
325	AACGAACGCTGGCGGCATGCCTAACACATGCAAGTCGAACGAACCCTTCGGGGTTAGTGGCGCACGGGTGCGTAACGCGTGGGAACCTGCCTTTAGGTTCGGAATAACTCAGAGAAATTT-TCGCCTTTAGATGGGCCCGCGTTGGATTAGCTAGTTGGTGGGGTAAAGGCCTACCAAGGCGACGATCCATAGCTGGTCTGAGAGGATGATCAGCCACACTGGGACTGAGACACGGCCCAG	0.0508854	0.0505988	0.0471087	0.0468165	0.0513149	0.0353857	0.0402868	0.0350723	0.0444444	0.0184911	0.0549652	0.0503271	0.0226296	0.0367579	0.0558481	0.0338524	0.0157381	0.0205973	0.0243487	0	0.0445286	0.0193667	0.0223914	0.0253341	0.0505476	0.0702889	0.0237192	0.0242395	0.0525707	0.0209702	0.0230734	0.0412906	Bacteria	Proteobacteria	Alphaproteobacteria	Sphingomonadales	Erythrobacteraceae	Porphyrobacter
326	GATGAACGCTAGCGGCAGGCTTAATACATGCAAGTCGAGGGGCAGCAGGGTGTAGCAATACATCGCTGGCGACCGGCAAACGGGTGAGGAACACGTACGCAACCTTCCTTCAAGTGGGGA-ACGCTTGAAGATGGGCGTGCGCCTGATTAGGTAGTTGGCGGGGTAACGGCCCACCAAGCCTGCGATCAGTAACTGGTGTGAGAGCACGACCAGTCACACGGGCACTGAGACACGGGCCCG	0.0407083	0.0337325	0.0235544	0.0234082	0.0513149	0.0151653	0.00805737	0.0175362	0.08	0	0.0732869	0.0503271	0.113148	0.0367579	0.0398915	0.0789889	0.0314762	0.061792	0.0486973	0.0622568	0.0333964	0.0193667	0.0447828	0.0506682	0.0336984	0.0421733	0.0237192	0.048479	0.0315424	0.0559206	0.0461467	0.0530879	Bacteria	Bacteroidetes	Sphingobacteria	Sphingobacteriales	Chitinophagaceae	Flavitalea
327	GATGAACGCTAGCGGCAGGCTTAATACATGCAAGTCGAGGGGCAGCGCAGTGTAGCAATACATGGGCGGCGACCGGCAAACGGGTGCGGAACACGTACGCAACCTTCCTTCAAGTGGGGA-TCGCTTGAAGATGGGCGTGCGCCTGATTAGGTAGTTGGCGGGGTAATGGCCCACCAAGCCTACGATCAGTAACTGGTGTGAGAGCACGACCAGTCACACGGGCACTGAGACACGGGCCCG	0.0508854	0	0.0117772	0.0234082	0.00641437	0.0151653	0.0241721	0	0.0888889	0.0924556	0.0916086	0.0251636	0.0452591	0.0551369	0.079783	0.0338524	0.0472144	0.0411946	0.073046	0.0466926	0.0445286	0.0581001	0.0447828	0.0316676	0.0673968	0.0351444	0.0118596	0.0242395	0.0315424	0.0279603	0.0230734	0.0412906	Bacteria	Bacteroidetes	Sphingobacteria	Sphingobacteriales	Chitinophagaceae	Niastella
328	AACGAACGCTGGCGGCATGCCTAACACATGCAAGTCGAACGAGACCTTCGGGTCTAGTGGCGCACGGGTGCGTAACGCGTGGGAATCTGCCCTTGGGTCCGGAATAACAGTTAGAAATGA-TCGCCCAGGGATGAGCCCGCGTAGGATTAGCTAGTTGGTGAGGTAAAGGCTCACCAAGGCGACGATCCTTAGCTGGTCTGAGAGGATGATCAGCCACACTGGGACTGAGACACGGCCCAG	0	0	0.0235544	0.0234082	0.0192431	0.0606612	0.0241721	0.0350723	0.0533333	0.0924556	0.0183217	0.0251636	0.0226296	0.0551369	0.151588	0.0677048	0.0314762	0.0411946	0.0973947	0.0622568	0.0333964	0.0774668	0.167936	0.0823358	0.0252738	0.0281156	0.0592979	0.0242395	0.0525707	0.097861	0.0865251	0.0294933	Bacteria	Proteobacteria	Alphaproteobacteria	Sphingomonadales	Sphingomonadaceae	Sphingomonas
329	GACGAACGCTGGCGGCGTGCTTAACACATGCAAGTCACGGGGGCCCGCAAGGGCAACCGGCGAACGGGTGCGTAACACGTGAACAACCTGCCCTCGTGTGGGGGATAGCCGGGCTAACGC-GCGCACGGGGAGGGGTTCGCGGCCTATCAGCTAGTTGGCGGGGTAATGGCCCACCAAGGCGACGACGGGTAGCTGGTCTGAGAGGATGGCCAGCCACATTGGGACTGAGAGACGGCCCAG	0.0203542	0.0505988	0.0235544	0	0.0128287	0	0	0.00876808	0.106667	0.110947	0.0916086	0.0754907	0.158407	0.147032	0.151588	0.0677048	0.173119	0.144181	0.146092	0.108949	0.0556607	0.0968335	0.0671742	0.0760023	0.084246	0.0913756	0.0711575	0.0969579	0.0841131	0.0768908	0.0865251	0.035392	Bacteria	Gemmatimonadetes	Gemmatimonadetes	Gemmatimonadales	Gemmatimonadaceae	Gemmatimonas
330	ATTGAACGCTGGCGGCATGCCTAACACATGCAAGTCGAACGGTAACGCGGAGAGCTTGCTCTCTGGCGACGAGTGGCGGACGGGTGAGTAATACTTAGGAATCTGCCCATTAGTGGGGGA-GCGCTAATGGATGAGCCTAAGTCGGATTAGCTTGTTGGTGGGGTAAAGGCCTACCAAGGCGACGATCCGTAGCTGGTCTGAGAGGACGATCAGCCACACTGGGACTGAGACACGGCCCAG	0	0.0168663	0.0353315	0.00780275	0.0384862	0.050551	0.0402868	0.0175362	0	0.0184911	0.0183217	0	0	0	0.0239349	0.0451365	0.0314762	0.0411946	0.0243487	0.0155642	0.0222643	0.00968335	0.0671742	0.0190006	0.0505476	0.0351444	0.0711575	0.0727185	0.147198	0.0699007	0.0346101	0.0589866	Bacteria	Proteobacteria	Gammaproteobacteria	Gammaproteobacteria_i.s.	Gammaproteobacteria_i.s.	Thioprofundum
331	GACGAACGCTGGCGGCGTGCTTAACACATGCAAGTCGAACGGTGAACCAGAGCTTGCTCTGGGGATCAGTGGCGAACGGGTGAGTAACACGTGAGCAACCTGCCCTTCACTCTGGGATAA-TCGGTGAAGGATGGGCTCGCGGCCTATCAGCTTGTTGGTGGGGTAATGGCCTACCAAGGCGACGACGGGTAGCCGGCCTGAGAGGGCGACCGGCCACACTGGGACTGAGACACGGCCCAG	0.0203542	0.0337325	0	0.0390137	0.00641437	0.0252755	0.0322295	0.0876808	0	0.0739645	0	0.0503271	0.0452591	0.018379	0.0079783	0.0451365	0.0472144	0.061792	0.0973947	0.077821	0.0222643	0.0387334	0.0335871	0.0253341	0.0336984	0.0492022	0.0474383	0.0242395	0.0105141	0.0419404	0.0807568	0.0471893	Bacteria	Actinobacteria	Actinobacteria	Actinomycetales	Intrasporangiaceae	Ornithinicoccus
332	ATTGAACGCTGGCGGCATGCCTAACACATGCAAGTCGAACGGGGTGTAGCAATACACCCAGTGGCGGACGGGTGAGGAATACGTAGGAATTTGCCCTTAAGTGGGGGATAGTCCGGGGAA-GCGCTTTTGGAGAAGCCTACGTCGGATTAGCTAGTTGGTGGGGTAATGGCTCACCAAGGCGACGATCCGTAACTGGTCTGAGAGGACGATCAGTCACACCGGAACTGAGACACGGTCCGG	0.122125	0.505988	0.0942174	0.0702247	0.0384862	0.0657163	0.0886311	0.0350723	0.0177778	0.0369822	0	0.0503271	0.0226296	0.0367579	0.0398915	0.0112841	0.0157381	0.0205973	0	0.0311284	0.0111321	0	0.0111957	0.0316676	0.0168492	0.0351444	0.0355787	0.0121197	0	0	0.00576834	0.017696	Bacteria	Proteobacteria	Gammaproteobacteria	Xanthomonadales	Sinobacteraceae	Nevskia
333	AACGAACGCTGGCGGCAGGCCTAACACATGCAAGTCGAACGCCCTCTTCGGAGGGAGTGGCAGACGGGTGAGTAACACGTGGGAACGTACCCTTTGGTTCGGAACAACTCCGGGAAACTG-TCGCCGAAGGATCGGCCCGCGTCGGATTAGCTTGTTGGTGGGGTAATGGCCCACCAAGGCGACGATCCGTAGCTGGTCTGAGAGGATGATCAGCCACACTGGGACTGAGACACGGCCCAG	0.0203542	0.0505988	0	0.0156055	0.0128287	0.0252755	0.0241721	0.0175362	0	0	0.0549652	0	0.0678887	0.018379	0.0319132	0.0451365	0.0314762	0.061792	0	0.0622568	0.0556607	0.0677835	0.0559785	0.0190006	0.0505476	0.0421733	0.118596	0.0969579	0.0946273	0.0489305	0.0346101	0.0294933	Bacteria	Proteobacteria	Alphaproteobacteria	Rhizobiales	un_Rhizobiales	un_Rhizobiales
334	GATGAACGCTGGCGGCGTGCCTAATACATGCAAGTCGAACGGACAGGCGCAAGCCTGTTAGTGGCGAACGGGTGAGTAACGCGTGGGTGACCTGCCCCAAAGAGCGGGATAACAGGCCGA-CCGCTTTGGGAGGGGCCTGCGTCCCATCAGCTAGTTGGTAGGGTAACGGCCTACCAAGGCGATGACGGGTAGGGGACCTGAGAGGGTGACCCCCCACAATGGAACTGAAACACGGTCCAT	0.132302	0.151796	0.0117772	0.0234082	0.0128287	0.0252755	0.0241721	0.0438404	0.0888889	0.0924556	0.164896	0.226472	0.113148	0.128653	0.0159566	0.0451365	0.0472144	0.0205973	0.073046	0.0622568	0.0333964	0.0290501	0	0.0253341	0.0168492	0.00702889	0.0118596	0.0121197	0	0.0139801	0.0288417	0.0117973	Bacteria	Chloroflexi	Anaerolineae	Anaerolineales	Anaerolineaceae	un_Anaerolineaceae
335	AGTGAACGCTGGCGGCAGGCCTAACACATGCAAGTCGAACGGCAGCACAGCAGTAGCAATACTGTGGGTGGCGAGTGGCGGACGGGTGAGGAATACATGGGAATCTACCCTGTCGTGGGG-GCGCGATTGGATGAGCCCATGTCGGATTAGCTAGTTGGCGGGGTAAAGGCCCACCAAGGCGACGATCCGTAGCTGGTCTGAGAGGATGATCAGCCACACTGGAACTGAGACACGGTCCAG	0.111948	0.0505988	0.16488	0.17166	0.186017	0.207259	0.185319	0.131521	0.0533333	0.0369822	0.0366435	0.0503271	0.0226296	0.018379	0.0877613	0.124125	0.0314762	0.0823893	0.073046	0.0311284	0.100189	0.0387334	0.0895656	0.0696688	0.0673968	0.0843467	0.0830171	0.048479	0.0630848	0.0139801	0.0980618	0.0471893	Bacteria	Proteobacteria	Gammaproteobacteria	Xanthomonadales	Xanthomonadaceae	Lysobacter
336	GATGAACGCTGGCGGCGTGCTTAACACATGCAAGTCGAACGATGACCCGGTGCTTGCACCGGTGATTAGTGGCGAACGGGTGAGTAACACGTGAGTAACCTGCCCTTAACTCTGGGATAA-GTGGTTTTGGATGGACTCGCGGCCTATCAGCTTGTTGGTGAGGTAATGGCTCACCAAGGCGACGACGGGTAGCCGGCCTGAGAGGGTGACCGGCCACACTGGGACTGAGACACGGCCCAG	0.122125	0.0505988	0.0471087	0.0702247	0.0192431	0.0758265	0.0402868	0.0350723	0	0.0369822	0.0183217	0.0251636	0	0.018379	0.0558481	0.0338524	0.0157381	0.061792	0.0243487	0.0311284	0.0111321	0	0	0.0253341	0.0336984	0.0421733	0.0237192	0.048479	0	0.0349504	0.0403784	0.0648853	Bacteria	Actinobacteria	Actinobacteria	Actinomycetales	Micrococcaceae	Arthrobacter
337	GACGAACGCTGGCGGCGTGCTTAACACATGCAAGTCACGGGGGGGTAGCAATACTCAACCGGCGAACGGGTGCGTAACACGTGACCAACCTGCCCTCGTGTGGGGGATAGCCGGGCTAAC-GTGCACGGGGAGGGGGTCGCGGCCTATCAGCTAGTTGGCGGGGTAACGGCCCACCAAGGCGACGACGGGTAGCTGGTCTGAGAGGATGGCCAGCCACATTGGGACTGAGAGACGGCCCAG	0.0101771	0	0	0	0.0128287	0.0050551	0	0.00876808	0.0444444	0.0554734	0.0732869	0.0503271	0.0905182	0.0551369	0.127653	0.101557	0.110167	0.144181	0.073046	0.0622568	0.0890571	0.0581001	0.100761	0.12667	0.0252738	0.0773178	0.0830171	0.181796	0.136684	0.0629107	0.0865251	0.0825813	Bacteria	Gemmatimonadetes	Gemmatimonadetes	Gemmatimonadales	Gemmatimonadaceae	Gemmatimonas
338	GATGAACGCTAGCGGCAGGCCTAATACATGCAAGTCGGACGAGATCAGTTCTTTCGGGAACTGGTTTAGTGGCGCACGGGTGCGTAACGCGTATGCAACCTACCTTAAACTGGGGGATAG-TTGGTTTAAGATGGGCATGCGTGCCATTAGCTAGTTGGAGAGGTAACGGCTCACCAAGGCGACGATGGCTAGGGGTTCTGAGAGGATGATCCCCCACACTGGTACTGAGATACGGACCAG	0.0814166	0.067465	0.0706631	0.0234082	0.0320718	0.0303306	0.0322295	0.0263043	0.0711111	0	0	0.0251636	0.0452591	0	0.0558481	0.0451365	0.0472144	0.0411946	0.121743	0.0466926	0.0556607	0.0484168	0.0671742	0.0570017	0.0168492	0.06326	0.0355787	0.0605987	0.0210283	0.0349504	0.017305	0.0412906	Bacteria	Bacteroidetes	Sphingobacteria	Sphingobacteriales	Cytophagaceae	Adhaeribacter
339	GATGAACGCTGGCGGCGTGCTTAACACATGCAAGTCAAGGGGGCTCAGCAATGGGCAACCGGCGAACGGGTGCGTAACACGTGAGCAACCTACCTAGGTGTGGGGGATAGCCGGCCCAAC-GGGCACTATGAGGGGCTCGCGGCCTATCAGCTAGTTGGCGAGGTAATGGCTCACCAAGGCGACGACGGGTAGCTGGTCTGAGAGGATGGCCAGCCACATTGGGACTGAGAAACGGCCCAG	0.0101771	0.0168663	0.0117772	0.00780275	0.0256575	0.0050551	0.00805737	0	0.115556	0.0554734	0.10993	0.0251636	0.0905182	0.0367579	0.0319132	0.0564207	0.0314762	0.0205973	0.0243487	0.155642	0.0333964	0.0387334	0.0671742	0.0380011	0.084246	0.0281156	0.0237192	0.0363592	0.0630848	0.0139801	0.0230734	0.0294933	Bacteria	Gemmatimonadetes	Gemmatimonadetes	Gemmatimonadales	Gemmatimonadaceae	Gemmatimonas
340	AATCAACGCTGGCGGCGCGCTTAACACATGCAAGTCGGACGAGAAAGGGGAGCAATCCCTGAGTAAAGTGGCGTACGGGTGAGTAACACGTGGGTAATCTACCTTCTGGTGGGGAATAAC-TCGCCGGAAGAGGAGCCCGCGGCTGATTAGCTAGTTGGTGAGGTAAAGGCTCACCAAGGCATTGATCGGTAGCCGGCCTGAGAGGGCACACGGCCACACTGGCACTGAAACACGGGCCAG	0.0305312	0	0.0471087	0.0390137	0.0128287	0.0151653	0.0725163	0.0526085	0.00888889	0.0554734	0.0549652	0	0.113148	0.018379	0.0398915	0.0677048	0.0629525	0.0411946	0	0.0933852	0.0667928	0.0581001	0.0111957	0.0316676	0.0505476	0.06326	0.0237192	0.0363592	0.0105141	0.0768908	0.0807568	0.0294933	Bacteria	Acidobacteria	Acidobacteria_Gp3	Acidobacteria_Gp3	Acidobacteria_Gp3	Gp3
341	GACGAACGCTGGCGGCGTGCTTAACACATGCAAGTCGAGCGGTAAGGCTCCTTCGGGAGTACACGAGCGGCGAACGGGTGAGTAACACGTGAGCAATCTGCCCTTCACACTGGGATACCC-GCGGTGAAGGATGAGCTCGCGGCCTATCAGCTTGTTGGTGAGGTAATGGCTCACCAAGGCTTCGACGGGTAGCCGGCCTGAGAGGGTGACCGGCCACACTGGGACTGAGACACGGCCCAG	0.0712396	0.118064	0.0706631	0.0780275	0.0577293	0.0707714	0.0483442	0.105217	0.0266667	0	0.0366435	0.100654	0.0226296	0	0.0239349	0.0112841	0	0.0205973	0	0.0155642	0	0.0290501	0.0335871	0.012667	0	0.0210867	0.0237192	0	0.0210283	0.0419404	0.0403784	0.0235946	Bacteria	Actinobacteria	Actinobacteria	Actinomycetales	Nocardioidaceae	Marmoricola
342	ATTGAACGCTGGCGGCATGCCTAACACATGCAAGTCGAACGGTAACAGGCCTTCGGGCGCTGACGAGTGGCGGACGGGTGAGTAATGCGTAGGAATCTGCCCAGTAGCGGGGGATAACTT-GCACTATTGGATGAGCCTACGTCGGATTAGCTTGTTGGTGGGGTAACGGCCTACCAAGGCGACGATCCGTAGCTGGTCTGAGAGGACGATCAGCCACACTGGGACTGAGACACGGCCCAG	0.0814166	0.067465	0.0706631	0.0546192	0.10263	0.156708	0.0402868	0.0613766	0.0355556	0.0184911	0	0	0	0.0551369	0.0159566	0.0112841	0.0157381	0	0	0	0.0445286	0.00968335	0.0223914	0.0190006	0.0252738	0.0421733	0.0118596	0.0363592	0.0420566	0.0279603	0.017305	0.0117973	Bacteria	Proteobacteria	Gammaproteobacteria	Gammaproteobacteria_i.s.	Gammaproteobacteria_i.s.	Thiohalobacter
343	GATGAACGCTAGCGGCAGGCTTAATACATGCAAGTCGAGGGGCAGCAGGGTGTAGCAATACACTGCTGGCGACCGGCAAACGGGTGAGGAACACGTGCGCAACCTTCCTTCAAGTGAGGA-ACGCTTGAAGATGGGCGTGCGTCTGATTAGGTAGTTGGCGGAGTAACAGCCCACCAAGCCTGCGATCAGTAACTGGTGTGAGAGCACGACCAGTCACACGGGCACTGAGACACGGGCCCG	0.0712396	0.0505988	0.0588859	0.0390137	0.0192431	0.0303306	0	0.00876808	0.0622222	0.0554734	0.0366435	0	0.113148	0.0367579	0.0319132	0.0789889	0.0944287	0.0411946	0	0.0933852	0.0445286	0.0193667	0.0559785	0.0760023	0.042123	0.0281156	0.0237192	0.0363592	0.0420566	0.0419404	0.0288417	0.0530879	Bacteria	Bacteroidetes	Sphingobacteria	Sphingobacteriales	Chitinophagaceae	Flavitalea
344	GACGAACGCTGGCGGCGTGCTTAACACATGCAAGTCGAGCGGAAAGGCCCTTCGGGGTACTCGAGCGGCGAACGGGTGAGTAACACGTGAGTAACCTGCCCTAGGCTCTGGGATAACTGT-TCGGCTTGGGATGGGCTCGCGGCCTATCAGCTTGTTGGTGGGGTGATGGCCTACCAAGGCTTCGACGGGTAGCCGGCCTGAGAGGGCGACCGGCCACACTGGGACTGAGACACGGCCCAG	0.0101771	0	0.0117772	0.093633	0.0192431	0.0353857	0.0161147	0.0438404	0.0177778	0	0	0	0	0.018379	0.0319132	0	0.0157381	0.061792	0	0.0155642	0.0333964	0.0193667	0	0.0696688	0.042123	0.105433	0.0237192	0.0121197	0.0630848	0.132811	0.0922935	0.106176	Bacteria	Actinobacteria	Actinobacteria	Actinomycetales	Micromonosporaceae	un_Micromonosporaceae
345	GACGAACGCTGGCGGCGTGCTTAACACATGCAAGTCGAACGGTAAGGCCCCTTCGGGGGTACACGAGTGGCGAACGGGTGAGTAACACGTGAGCAACCTGCCCTTGACTCTGGGATAACA-GCGGTCAAGGATGGGCTCGCGGCCTATCAGCTTGTTGGTGAGGTAACGGCTCACCAAGGCTTCGACGGGTAGCCGGCCTGAGAGGGCGACCGGCCACACTGGGACTGAGATACGGCCCAG	0.0712396	0.0337325	0.0471087	0.0546192	0.0192431	0.0707714	0.0322295	0.0789128	0.0533333	0.0184911	0.0183217	0.0251636	0.0226296	0.0367579	0.0398915	0.0338524	0.0472144	0.0205973	0.0243487	0.0311284	0.0222643	0.0193667	0.0111957	0.0253341	0.042123	0.0421733	0.0355787	0.0363592	0.0210283	0.0139801	0.0403784	0.0589866	Bacteria	Actinobacteria	Actinobacteria	Actinomycetales	Propionibacteriaceae	un_Propionibacteriaceae
346	AATCAACGCTGGCGGCGTGCCTCAGACATGCAAGTCGAACGCGAAAGTTCCCTTCGGGGAGCGAGTAGAGTGGCGCACGGGTGAGTAACACGTAGGTAATCTACCTTTGGATTGGGAATA-GCGTCTAAAGAGGAGCCTGCGGCGGATTAGCTAGTTGGTAAGGTAATGGCTTACCAAGGCGATGATCCGTAGCCGGCCTGAGAGGGCGGTCGGCCACACTGACACTGACATACGGGTCAG	0.0407083	0.0337325	0.0471087	0.0468165	0.121873	0.0252755	0.0644589	0.0964489	0.0533333	0.0554734	0.0183217	0.0754907	0.0678887	0.0367579	0.0478698	0.0225683	0.0314762	0.0205973	0.0243487	0.077821	0.111321	0.0677835	0.0671742	0.0316676	0.0758214	0.0351444	0.0237192	0.0848382	0.0525707	0.0489305	0.0346101	0.017696	Bacteria	Acidobacteria	Acidobacteria_Gp4	Acidobacteria_Gp4	Acidobacteria_Gp4	Gp4
347	GATGAACGCTGGCGGTGTGCCTAAGGTATGCAAGTCGAACGATCTCGGTTTACCGAGATAGTGGCAGACGGCTGAGTAATATACAGAAACGTACCCCTAACACAGGTATACCCCCGGGAA-GCGGTTAGGGACCGGTCTGTAGCCTATCAGCTAGTTGGTGGGGTAAAGGCCTACCAAGGCTATGACGGGTAGGGGGCCTGAGAGGGCGATCCCCCAGAATGGGACTGCGACACGGCCCAT	0	0	0	0	0.00641437	0	0.0322295	0.00876808	0	0	0	0	0	0	0	0.0112841	0	0	0	0	0.0222643	0	0	0	0	0	0.130455	0.436311	0.315424	0.0559206	0.0461467	0.0294933	Bacteria	un_Bacteria	un_Bacteria	un_Bacteria	un_Bacteria	un_Bacteria
348	AACGAACGCTGGCGGCAGGCTTAACACATGCAAGTCGAACGCCCCGCAAGGGGAGTGGCAGACGGGTGAGTAACGCGTGGGAACCTACCCAATTCTACGGAACAACTGAGGGAAACTTCA-TCGGAATTGGATGGGCCCGCGTTGGATTAGCTAGTTGGTGGGGTAACGGCCTACCAAGGCGACGATCCATAGCTGGTCTGAGAGGATGATCAGCCACACTGGGACTGAGACACGGCCCAG	0.0101771	0	0.0117772	0.0156055	0	0.0101102	0.00805737	0.0526085	0.0266667	0.0369822	0.0183217	0.0503271	0.0226296	0	0.0239349	0.0338524	0.0314762	0.0411946	0.0243487	0.0155642	0.0556607	0.0387334	0.0447828	0.012667	0.0336984	0.0140578	0.0948767	0.121197	0.0841131	0.0699007	0.0634518	0.0530879	Bacteria	Proteobacteria	Alphaproteobacteria	Rhizobiales	Hyphomicrobiaceae	Devosia
349	AATCAACGCTGGCGGCGCGCCTAACACATGCAAGTCGCACGAGAAAGGCTCCTTCGGGGGCTGAGTACAGTGGCGCACGGGTGAGTAACACGTGGATACCTGCCCTCAAGTGGGGAATAA-GCGCTTGAGGAGGGGTCCGCGGCTGATTAGCTAGTTGGTGGGGTAAAAGCCTACCAAGGCAAAGATCAGTAGCCGGCCTGAGAGGGCACACGGCCACACTGGCACTGAGACACGGGCCAG	0.0305312	0.0337325	0.0117772	0.0156055	0.0192431	0.0101102	0.00805737	0.0350723	0.0177778	0.0184911	0.0366435	0.0503271	0	0.0735159	0.119674	0.0451365	0.0314762	0.0411946	0	0.0155642	0.0890571	0.0193667	0.0559785	0.0506682	0.042123	0.0140578	0.0355787	0.0363592	0.0420566	0.0349504	0.017305	0.0530879	Bacteria	Acidobacteria	Acidobacteria_Gp3	Acidobacteria_Gp3	Acidobacteria_Gp3	Acidobacteria_Gp3
350	GACGAACGCTGGCGGCGTGCTTAACACATGCAAGTCGAACGGTGACCTCGGTGCTTGCACCGGGTGATCAGTGGCGAACGGGTGAGTAACACGTGAGTAACCTGCCCCTGACTCTGGGAT-TCGGTTGGGGATGGACTCGCGGCCTATCAGCTAGTTGGTGAGGTAACGGCCCACCAAGGCGACGACGGGTAGCCGGCCTGAGAGGGCGACCGGCCACACTGGGACTGAGACACGGCCCAG	0.0305312	0.0505988	0.0353315	0.0780275	0.0320718	0.0454959	0.0322295	0.0263043	0.0177778	0.0554734	0.0549652	0.0503271	0.0678887	0.0551369	0.0638264	0.0225683	0.0314762	0.0205973	0.073046	0.108949	0.0556607	0.0290501	0.0111957	0.0506682	0.0505476	0.0281156	0.0237192	0.0363592	0.0525707	0.0279603	0.0692201	0.100277	Bacteria	Actinobacteria	Actinobacteria	Actinomycetales	un_Actinomycetales	un_Actinomycetales
351	AACGAACGCTGGCGGCAGGCTTAACACATGCAAGTCGAACGCACTCTTCGGAGTGAGTGGCAGACGGGTGAGTAACGCGTGGGAATCTACCCAGCTCTACGGAATAACCCAGGGAAACTT-TCGGAGTTGGATGAGCCCGCGTCGGATTAGCTAGTTGGTAGGGTAATGGCCTACCAAGGCGACGATCCGTAGCTGGTCTGAGAGGATGATCAGCCACATTGGGACTGAGACACGGCCCAG	0.0203542	0.0168663	0	0.031211	0.0192431	0	0.0241721	0.00876808	0.0622222	0.0184911	0.0732869	0.0251636	0.0905182	0.0918949	0.0558481	0.0789889	0.0314762	0.102987	0.073046	0.0155642	0.0445286	0.0968335	0.0447828	0.0253341	0.0589722	0.0140578	0.0118596	0.0727185	0.0315424	0.0489305	0.0461467	0.0648853	Bacteria	Proteobacteria	Alphaproteobacteria	Rhizobiales	Phyllobacteriaceae	Mesorhizobium
352	GACGAACGCTGGCGGCGTGCTTAACACATGCAAGTCGAGCGAGGCCCCTCCTTCGGGGGGGTGTCCTAGCGGCGAACGGGTGAGTAACACGTGGGCAACCTGCCCTCAGCTCTGGGATAA-TCGGCTGGGGATGGGCCCGCGGCCTATCAGCTTGTTGGTGGGGTAGTGGCCTACCAAGGCGACGACGGGTAGCCGGCCTGAGAGGGTGACCGGCCACACTGGGACTGAGACACGGCCCAG	0.111948	0.0843313	0.141326	0.156055	0.0641437	0.0960469	0.0564016	0.105217	0.0533333	0.0184911	0.128252	0.125818	0.135777	0.0735159	0.0478698	0.0338524	0.0314762	0.0205973	0.0973947	0.0155642	0.0222643	0.0387334	0.0447828	0.0253341	0.0336984	0.0843467	0.0355787	0.0727185	0.0105141	0.0699007	0.0922935	0.0707839	Bacteria	Actinobacteria	Actinobacteria	Actinomycetales	Geodermatophilaceae	Blastococcus
353	GACGAACGCTGGCGGCGCGCTTAACACATGCAAGTCGTACGGGCGCCTTCGGGCGTCAGTGGCGAACGGGTGCGTAACACGTGAGTGACCTGCCCCTGTGCGGGGGATAACCCGGGGAAA-GTGTGCAGGGAGGGGCTCGCGGCGTATCAGGTAGTTGGTGGGGTAACGGCCCACCAAGCCGATGACGCGTAGGGGGTCTGAGAGGATGGCCCCCCACATTGGGACTGAGATACGGCCCAG	0	0	0.0117772	0.0234082	0.0192431	0.0151653	0.0161147	0.0263043	0.124444	0.0924556	0.183217	0.176145	0.0678887	0.110274	0.079783	0.101557	0.0786906	0.123584	0.121743	0.0622568	0.077925	0.0387334	0.0895656	0.0823358	0.084246	0.0773178	0.0474383	0.0848382	0.0630848	0.0629107	0.0519151	0.0648853	Bacteria	Gemmatimonadetes	Gemmatimonadetes	Gemmatimonadales	Gemmatimonadaceae	Gemmatimonas
354	GACGAACGCTGGCGGCGCGCCTAACACATGCAAGTCGAGCGAGAACCGGAGCTTCGGCTCCGGGGACAGCGGCGAACGGGTGAGTAACACGTGGATAACCTGCCCTCGGCACCGGAATAG-CTGGCCGAGGATGGGTCCGCGGTGGATTAGCTTGTTGGTGGGGTAATGGCCCACCAAGGCGACGATCCATAGCTGGTCTGAGAGGACGATCAGCCACACTGGGACTGAGACACGGCCCAG	0.0203542	0	0.0471087	0.0156055	0.00641437	0.0050551	0.0322295	0.0438404	0.0355556	0.0184911	0.0366435	0.0251636	0.0452591	0.0367579	0.0638264	0.0112841	0.0629525	0.061792	0.0243487	0.0466926	0.0333964	0.1162	0.0447828	0.0190006	0.0168492	0.06326	0.0948767	0.0727185	0.0525707	0.0559206	0.0692201	0.0707839	Bacteria	Actinobacteria	Actinobacteria	un_Actinobacteria	un_Actinobacteria	un_Actinobacteria
355	ATTGAACGCTAGCGGGATGCTTTACACATGCAAGTCGAACGGCAGCGCGAGAAAAGCTTGCTTTTCTTGGCGGCGAGTGGCGAACGGGTGAGTAATATATCGGAACGTGCCCAGTAGCGG-TCACTATTGGAGCGGCCGATATCAGATTAGCTAGTTGGTGGGGTAAAGGCCTACCAAGGCCACGATCTGTAGCTGGTTTGAGAGGACGACCAGCCACACTGGGACTGAGACACGGCCCAG	0.0712396	0.0505988	0.0824402	0.0780275	0.0449006	0.101102	0.0886311	0.0438404	0.00888889	0.0369822	0.0183217	0.0251636	0	0.0367579	0.0478698	0.0225683	0	0	0	0.0466926	0.0445286	0.0290501	0.0783699	0.0190006	0.0505476	0.0140578	0.0118596	0.0242395	0.0420566	0.0139801	0.00576834	0.0117973	Bacteria	Proteobacteria	Betaproteobacteria	Burkholderiales	Alcaligenaceae	Pusillimonas
356	GACGAACGCTGGCGGCGTGCTTAACACATGCAAGTCGAGCGAGGCCTTCCCTTCGGGGGAGTGTCCTAGCGGCGAACGGGTGAGTAACACGTGGGCAACCTGCCCTCAGCTCTGGGATAA-TCGGCTGGGGATGGGCCCGCGGCCTATCAGCTTGTTGGTGGGGTAGTGGCCTACCAAGGCGACGACGGGTAGCCGGCCTGAGAGGGTGACCGGCCACACTGGGACTGAGACACGGCCCAG	0.0712396	0.101198	0.0471087	0.0546192	0.0577293	0.0606612	0.0402868	0.0701447	0.0266667	0.0369822	0.0549652	0.0503271	0.0226296	0	0.0319132	0.0112841	0.0314762	0.0205973	0.0243487	0.0311284	0.0111321	0.0387334	0.0335871	0.0316676	0.0168492	0.0773178	0.0474383	0.0242395	0.0105141	0.0279603	0.0865251	0.0412906	Bacteria	Actinobacteria	Actinobacteria	Actinomycetales	Geodermatophilaceae	Blastococcus
357	AGCGAACGCTGGCGGCAGGCCTAACACATGCAAGTCGAGCGGCCGTAGCAATACGGCAGCGGCAGACGGGAGAGTAACACGTGGGAACGCGCCCTTCGGTTCGGAATAACTCAGGGAAAC-TCGCCGAAGGAACGGCCCGCGTCCGATTAGCTAGTTGGTGAGGTAATGGCTCACCAAGGCAACGATCGGTAGCTGGTCTAAGAGGATGATCAGCCTCACTGGGACTGAGACACGGCCCAG	0.0712396	0.101198	0.0471087	0.0546192	0.0449006	0.0353857	0.0725163	0.0789128	0.0177778	0	0.0549652	0.125818	0.113148	0	0.0478698	0.101557	0.0629525	0.0411946	0.0243487	0.077821	0.077925	0.0193667	0.0223914	0.0443347	0.0336984	0.0562311	0.0474383	0.0848382	0.0841131	0.090871	0.0634518	0.0471893	Bacteria	Proteobacteria	Alphaproteobacteria	Rhizobiales	Xanthobacteraceae	Pseudolabrys
358	GATGAACGCTGGCGGCGTGCCTAATGCATGCAAGTCGAGCGACGCATGCCGGAGGGGTAACCCACTGGTATGACGGAGCGGCGAACGGGTGAGTAACACGTGAGCAACCTGCCCCTCAGA-GCGCTGAGGGATGGGCTCGCGGCCTATCAGCTTGTTGGTGGGGTAACGGCCTACCAAGGCTGCGACGGGTAGCTGGTCTGAGAGGACGATCAGCCACACTGGGACTGAGACACGGCCCAG	0.0101771	0.0505988	0	0.00780275	0.00641437	0	0.00805737	0	0.0977778	0.0739645	0.0916086	0	0.0678887	0.0918949	0.0558481	0.0677048	0.0472144	0.0411946	0.0243487	0.0155642	0.0333964	0.0484168	0.0335871	0.0190006	0.0589722	0.0281156	0.0355787	0.0121197	0.0420566	0.0489305	0.0519151	0.017696	Bacteria	Actinobacteria	Actinobacteria	un_Actinobacteria	un_Actinobacteria	un_Actinobacteria
359	GACAAACGCTGGCGGGGTGCATGAGACATGCAAGTCGAACGGGGTTGAGCGGGCTTGCTCGATCAACCTAGTGGCGGACGGCTGAGTAACGCGTAGGTGACCTACCCGGAAGTGGGGAAT-GGCGCTTCCGGCGGGGCCTGCGTCCGATTAGCTAGTTGGTGGGGTAATGGCTCACCAAGGCGACGATCGGTAGCTGGTCTGAGAGGATGATCAGCCAGACTGGGACTGAGAACGGCCCAG	0.0305312	0	0.0117772	0	0.0384862	0.0252755	0.00805737	0.0350723	0.151111	0.129438	0.0366435	0.125818	0.135777	0.128653	0.207436	0.157978	0.236072	0.247168	0.121743	0.249027	0.15585	0.213034	0.223914	0.171005	0.185341	0.105433	0.201613	0.218155	0.210283	0.097861	0.178819	0.159264	Bacteria	un_Bacteria	un_Bacteria	un_Bacteria	un_Bacteria	un_Bacteria
360	GATGAACGCTAGCGGCAGGCTTAATACATGCAAGTCGTGGGGCAGCAGGTTTGTAGCAATACAGATGCTGGCGACCGGCAAACGGGTGAGGAACACGTACACAACCTTCCTTCAAGTGGG-GCGCTTGAAGACGGGTGTGCGCCTGATTAGGTAGTTGGCGGGGTAACGGCCCACCAAGCCTACGATCAGTAACTGGTGTGAGAGCACGACCAGTCACACGGGCACTGAGACACGGGCCCG	0	0	0.0471087	0	0.0384862	0.0050551	0.15309	0	0.0177778	0	0.0183217	0.0251636	0	0	0.0558481	0.0677048	0.0157381	0	0.0486973	0.0155642	0.0445286	0.0871502	0.0447828	0.00633352	0.0168492	0.0210867	0.106736	0.0969579	0.12617	0.0209702	0.0115367	0.017696	Bacteria	Bacteroidetes	Sphingobacteria	Sphingobacteriales	Chitinophagaceae	un_Chitinophagaceae
361	GATGAACGCTAGCGGCAGGCCTAACACATGCAAGTCGAGGGGCATCACGGGAAAGCTTGCTTTTCTGGTGGCGACCGGCGCACGGGTGCGGAACGCGTATGGAACCTGCCCCTGTCAGGG-TCGGACAGGGATGGCCATGCGTACCATTAGCTAGTTGGTAAGGTAACGGCTTACCAAGGCAACGATGGTTAGGGGCCCTGAGAGGGGGATCCCCCACACTGGTACTGAGACACGGACCAG	0.0305312	0.0337325	0.0471087	0.0702247	0.0769724	0.0454959	0.0483442	0.0526085	0.00888889	0.0554734	0.0549652	0.0251636	0.0226296	0.0367579	0.0398915	0.101557	0.0629525	0.0411946	0.0973947	0.0933852	0.0333964	0.0677835	0.0447828	0.0633352	0.0926706	0.0702889	0.106736	0.0727185	0.0630848	0.0768908	0.0519151	0.0707839	Bacteria	Bacteroidetes	Flavobacteria	Flavobacteriales	Flavobacteriaceae	Muricauda
362	GATGAACGCTAGCGGCAGGCCTAATACATGCAAGTCGAACGATAGGTGGCAGCAATGTCACCGAAAGTGGCGCACGGGTGCGTAACACGTATGCAACCTACCCATTACTGGGGGATAGCC-TCGGTAATGGATGGGCATGCGTCCGATTAGCTAGTTGGCGGGGTAACGGCCCACCAAGGCAACGATCGGTAGGGGGTCTGAGAGGATGATCCCCCACACTGGTACTGAGATACGGACCAG	0.0101771	0.0505988	0.0353315	0.0390137	0.0577293	0.0151653	0.112803	0.00876808	0.00888889	0	0	0.0251636	0	0	0.0319132	0	0.0314762	0.0205973	0.0243487	0.0155642	0.0667928	0.0193667	0.0335871	0.0443347	0.0336984	0.0281156	0.0830171	0.0727185	0.0841131	0	0.0230734	0.0294933	Bacteria	Bacteroidetes	Sphingobacteria	Sphingobacteriales	Flammeovirgaceae	Roseivirga
363	ATTGAACGCTGGCGGCATGCTTTACACATGCAAGTCGAGCGGCAGCGCGGGGGCAACCCTGGCGGCGAGCGGCGAACGGGTGAGTAATGCATCGGAACGTGTCCCGTAATGGGGGATAAC-ACGTTAGGGGAGCGGCCGATGTCCGATTAGCTAGTTGGTGGGGTAACGGCCCACCAAGGCGACGATCGGTAGCTGGTCTGAGAGGATGATCAGCCACACTGGGACTGAGACACGGCCCAG	0.0203542	0	0.0235544	0.0390137	0.0192431	0	0.00805737	0.0350723	0.0622222	0.0924556	0.146574	0.0754907	0.0226296	0.018379	0.0638264	0.0338524	0.0629525	0.0823893	0.0243487	0.0311284	0.077925	0.0774668	0.0559785	0.0443347	0.0336984	0.0562311	0.118596	0.0848382	0.0946273	0.0559206	0.0403784	0.0589866	Bacteria	Proteobacteria	Gammaproteobacteria	Xanthomonadales	Xanthomonadaceae	un_Xanthomonadaceae
364	GACGAACGCTGGCGGCGTGCTTAACACATGCAAGTCGAACGGTAAGGCCCCTTCGGGGGTACACGAGTGGCGAACGGGTGAGTAACACGTGAGCAACCTGCCCTTGACACCGGAATAACA-GCGGTCAAGGATGGGCTCGCGGCCTATCAGCTAGTTGGTGAGGTAACGGCTCACCAAGGCTTCGACGGGTAGCCGGCCTGAGAGGGCGACCGGCCACACTGGGACTGAGATACGGCCCAG	0.0610625	0.0505988	0.0942174	0.0702247	0.0384862	0.0252755	0.0644589	0.105217	0.08	0.147929	0.0732869	0.125818	0.0452591	0.0551369	0.0718047	0.0338524	0	0.0205973	0.0486973	0.077821	0.0111321	0.0387334	0.0223914	0.0316676	0.0168492	0.0351444	0.0118596	0.133317	0	0.0419404	0.0576834	0.0589866	Bacteria	Actinobacteria	Actinobacteria	Actinomycetales	Propionibacteriaceae	Microlunatus
365	ATTGAACGCTGGCGGTATGCTTAACACATGCAAGTCGAGCGGTAACAGACCTTCGGGTGCTGACGAGCGGCGGACGGGTGAGTAACGCGTGGGAATCTGCCCTTTGGTGGGGGATAACCT-GCGCCAATGGATGAGCCCGCGTCCGATTAGCTAGTTGGTGGGGTAAGGGCCTACCAAGGCGACGATCGGTAGCTGGTCTGAGAGGATGATCAGCCACACTGGGACTGAGACACGGCCCAG	0.0508854	0.0337325	0.0235544	0.0546192	0.0577293	0.0404408	0.0644589	0.0876808	0.0355556	0.0184911	0.0183217	0.0754907	0.0905182	0.018379	0.0319132	0.0451365	0	0.0205973	0.073046	0.0155642	0.0111321	0.0290501	0	0.0380011	0.0168492	0.0210867	0	0.0242395	0.0210283	0.0279603	0	0.035392	Bacteria	Proteobacteria	Gammaproteobacteria	Chromatiales	Ectothiorhodospiraceae	un_Ectothiorhodospiraceae
366	AACGAACGCTGGCGGCAGGCTTAACACATGCAAGTCGAACGCGTGTAGCAATACACGAGTGGCGCACGGGTGAGTAACGCGTGGATATCTGCCTTTTGGTTCGGAATAACCCCGGGAAAC-TCGCCAAAAGATGAGTCCGCGTACGATTAGCTAGTTGGTGAGGTAATGGCTCACCAAGGCGACGATCGTTAGCTGGTCTGAGAGGACGATCAGCCACACTGGGACTGAGACACGGCCCAG	0.0305312	0.0337325	0.0588859	0.0780275	0.0449006	0.0303306	0.104746	0.0701447	0.0622222	0.0739645	0.0549652	0.0251636	0.0226296	0.0551369	0.0558481	0.0564207	0.125905	0.0205973	0.0243487	0.0311284	0.077925	0.0581001	0.0447828	0.0443347	0.0336984	0.0140578	0.0355787	0.048479	0.0315424	0.0279603	0.0461467	0.0471893	Bacteria	Proteobacteria	Alphaproteobacteria	un_Alphaproteobacteria	un_Alphaproteobacteria	un_Alphaproteobacteria
367	AACGAACGCTGGCGGCGTGCCTAACACATGCAAGTCGTACGCAGTAGCAATACTGAGTGGCGCACGGGTGAGTAACACGTGGGTAATCTACCCTCGAGTCTGGGATAACCGGCCGAAAGG-GCGCTTGTGGATGAGCTCGCGTCCCATTAGCTAGTTGGCGGTGTAACGGACCACCAAGGCGACGATGGGTAGCTGGTCTGAGAGGATGATCAGCCACACTGGCACTGAAACACGGGCCAG	0.0407083	0.0337325	0.0588859	0.0234082	0.0641437	0.0151653	0.00805737	0.0350723	0	0	0	0.0251636	0.0226296	0	0.0558481	0.0451365	0.0314762	0.061792	0.0486973	0.0311284	0.0667928	0.0484168	0.0223914	0.0443347	0.0252738	0.0281156	0.0355787	0.0605987	0.0210283	0.0279603	0.0288417	0.0117973	Bacteria	Proteobacteria	Deltaproteobacteria	un_Deltaproteobacteria	un_Deltaproteobacteria	un_Deltaproteobacteria
368	ATTGAACGCTGGCGGCAGGCCTAACACATGCAAGTCGAGCGGTAACAGGAGAGCTTGCTCTCGCTGACGAGCGGCGGACGGGTGAGTAATGCGCAGGAATCTACCCAGTAGCGGGGGATA-GCACTATTGGAAGAGCCTGCGTTGGATTAGCTAGTTGGTAGGGTAAAGGCCTACCAAGGCGACGATCCATAACTGGTCTGAGAGGATGATCAGTCACACCGGAACTGAGACACGGTCCGG	0.152656	0.168663	0.117772	0.0468165	0.0898012	0.0758265	0.0161147	0.0175362	0.0622222	0	0.0366435	0	0.0226296	0.0735159	0.0079783	0.0112841	0.0157381	0.0205973	0.0243487	0	0.0111321	0.0193667	0.0111957	0.00633352	0.0084246	0.0351444	0.0118596	0.0242395	0.0210283	0.00699007	0.0115367	0	Bacteria	Proteobacteria	Gammaproteobacteria	Oceanospirillales	un_Oceanospirillales	un_Oceanospirillales
369	GATGAACGCTAGCGGCAGGCTTAATACATGCAAGTCGAACGGTAACAGGGCGTAGCAATACGCTGCTGACGAGTGGCGCACGGGTGAGTAACGCGTATGCAATCTGCCCTCAACTGGAGA-GCGGTTGAGGATGAGCATGCGTGACATTAGCTTGTTGGTGAGGTAACGGCTCACCAAGGCGACGATGTCTAGGGGGTCTGAGAGGATGATCCCCCACACTGGTACTGAGACACGGACCAG	0	0	0	0	0.0128287	0.0202204	0.120861	0.122753	0	0	0	0	0	0	0.0159566	0	0.0314762	0	0	0	0.0111321	0.0193667	0.0447828	0.0253341	0	0.00702889	0.118596	0.0727185	0.073599	0.0349504	0.0403784	0.0707839	Bacteria	Bacteroidetes	un_Bacteroidetes	un_Bacteroidetes	un_Bacteroidetes	un_Bacteroidetes
370	ATTGAACGCTGGCGGCGTGCCTAACACATGCAAGTCGAGCGGTAACGCGGGGGCAACCCTGGCGACGAGCGGCGAACGGGTGAGTAACGTTTGGGAATCTACCTACTAGTGGGGGACAAC-GCGCTAGTAGATGAGCCCAAATCGGATTAGCTAGTTGGTGGGGTAATGGCCCACCAAGGCGACGATCCGTAGCTGGTCTGAGAGGACGACCAGCCACACTGGGACTGAGACACGGCCCAG	0.0407083	0.067465	0.0117772	0.0546192	0.0705581	0.0454959	0.0402868	0.0175362	0.0355556	0.0739645	0.0549652	0.100654	0.0452591	0.018379	0.0319132	0.0225683	0.0472144	0.0205973	0.0243487	0	0.0111321	0.0387334	0.0559785	0.0190006	0.0252738	0.0210867	0.0355787	0.0363592	0.0210283	0.0349504	0.0115367	0	Bacteria	Proteobacteria	Gammaproteobacteria	Xanthomonadales	Sinobacteraceae	Steroidobacter
371	GGCAAACGCTGGCGGCGTGCCTAAAACATGCAAGTCGAACGCACATCCTTGTGGTGTGAGTGGCAGACGGCTGAGTAACGCGTGGGTGACGTACCCGATGGTGGGGAATAACTGCCCGAA-CCATTGATCGAGCGGCCCGCGTTCGATTAGCTAGTTGGTGGGGTAACGGCCTACCAAGGCGACGATCGATAGCTGGTCTCAGAGGATGATCAGCCAGACTGGGACTGAGACACGGCCCAG	0.0508854	0.0337325	0.0235544	0.0702247	0.0192431	0.0202204	0.0402868	0.0701447	0.00888889	0.0369822	0.0732869	0	0.0452591	0.0551369	0.0159566	0.0112841	0.0314762	0.0411946	0.0243487	0.0311284	0.0667928	0.00968335	0	0.0190006	0.0252738	0.0281156	0.0355787	0.0727185	0.0210283	0.0489305	0.0461467	0.0589866	Bacteria	Chloroflexi	un_Chloroflexi	un_Chloroflexi	un_Chloroflexi	un_Chloroflexi
372	AACGAACGCTGGCGGCGTGTTTAAGACATGCAAGTCGAACGGGGAGTATTTGGAGTTTACTTTAAATGCTCCTAGTGGCGCACGGGTGCGTAACACGTGAGTTACATGCCCTGCAGTGGA-CCGCTGCAGGATTGGCTCGCGGCCTATCAGCTTGTTGGTGAGGTAACGGCTCACCAAGGCAACGACGGGTACCTGGTCTGAGAGGATGATCAGGCACACTGGAACTGAGACACGGTCCAG	0.0101771	0	0	0	0.0128287	0	0.0161147	0	0.0177778	0.0369822	0	0.0251636	0.0452591	0.018379	0.0558481	0.0338524	0.0472144	0	0.0486973	0.0466926	0.0333964	0.0193667	0.0223914	0.0760023	0.0505476	0.0562311	0.0474383	0.0727185	0.0315424	0.0209702	0.0692201	0.0235946	Bacteria	Verrucomicrobia	Verrucomicrobiae	Verrucomicrobiales	Verrucomicrobiaceae	Haloferula
373	GATGAACGCTAGCGGCAGGCTTAATACATGCAAGTCGAGGGGCAGCACGGGTAGCAATACCTGGTGGCGACCGGCAAACGGGTGAGGAACATGTACGCAACCTTCCTTTAACTGGAGGAT-GCGGTTAAAGATGGGCGTGCACCTGATTAGATAGTTGGTGAGGTAACGGCTCACCAAGTCAGCGATCAGTAACTGGTGTGAGAGCACGACCAGTCACACGGGCACTGAGACACGGGCCCG	0.0915937	0	0.0353315	0.031211	0.0128287	0.0556061	0.00805737	0.0263043	0.0355556	0.0554734	0.0366435	0.0754907	0	0.0367579	0.0239349	0.0564207	0.0786906	0	0.073046	0.0466926	0.0667928	0.00968335	0.0223914	0.0380011	0.084246	0.0281156	0	0	0.0105141	0.0279603	0.0346101	0.035392	Bacteria	Bacteroidetes	Sphingobacteria	Sphingobacteriales	Chitinophagaceae	Ferruginibacter
374	GATGAACGCTGGCGGCGTGCCTTAGACATGCAAGTCGAACGAAGCACCTTGCGACTATCACTTCGGTGAGAAGCAATAGGTGACTTAGTGGCGAACGGGTGAGTAACACGTGGGTGACCT-TCGCTTCGGGATGGGCCCGCGGTCCATCAGCTAGTTGGTAGGGTAATGGCCTACCAAGGCTACGACGGATAGCCGGCCTGAGAGGGTGATCGGCCACAGGGGCACTGAGACACGGGCCCC	0.0508854	0.0168663	0.0588859	0.117041	0.0769724	0.0657163	0.0483442	0.0526085	0.00888889	0	0.0183217	0.0251636	0	0	0.0319132	0.0225683	0.0472144	0	0.0243487	0.0155642	0.0111321	0.00968335	0.0559785	0.012667	0.0084246	0.0140578	0.0237192	0.0242395	0.0315424	0.0139801	0.0115367	0.0117973	Bacteria	Deinococcus-Thermus	Deinococci	Deinococcales	Trueperaceae	Truepera
375	GACGAACGCTGGCGGCGCGCCTAATACATGCAAGTCGAACGGGTCCCTCTTCGGAGGGGCTAGTGGCGGACGGGTGAGTAACACGTGGGCGACCTGCCTTCGAGTGGGGAATAACGCTGG-GCGCTCGAAGAGGGGCCTGCGGCGGATTAGCTAGTCGGTGGGGTCACGGCCTACCGAGGCGACGATCCGTAGCTGGTCTGAGAGGATGATCAGCCACACTGGGACTGAGACACGGCCCAG	0	0	0.0706631	0.0468165	0.0128287	0.0101102	0.00805737	0.0789128	0.0177778	0.0554734	0.0366435	0.100654	0.0452591	0.0551369	0.0478698	0.0564207	0	0.0205973	0	0.0155642	0.0111321	0	0.0335871	0.0443347	0.0505476	0.0351444	0.0592979	0.0605987	0.0210283	0.0209702	0.0749885	0.0530879	Bacteria	un_Bacteria	un_Bacteria	un_Bacteria	un_Bacteria	un_Bacteria
376	GATGAACGCTAGCGGCAGGCTTAATACATGCAAGTCGTGGGGCAGCAGGGGTGTAGCAATACACTCGCTGGCGACCGGCAAACGGGTGCGGAACACGTACGCAACCTACCCAAAACTGGG-GCGGTTTTGGATGGGCGTGCGCCTGATTAGGTAGTTGGCGGGGTAACGGCCCACCAAGCCAGCGATCAGTAACTGGTGTGAGAGCACGACCAGTCACACGGGCACTGAGACACGGGCCCG	0.0305312	0.0505988	0.0353315	0.0156055	0.0384862	0.0252755	0.0322295	0.0438404	0.0266667	0	0.0366435	0	0.0226296	0	0.0159566	0.0451365	0.0944287	0.061792	0.0486973	0.0311284	0.0222643	0.0581001	0.0447828	0.0506682	0.0505476	0.0351444	0.0592979	0.0242395	0.0105141	0.0209702	0.017305	0.0412906	Bacteria	Bacteroidetes	Sphingobacteria	Sphingobacteriales	Chitinophagaceae	Flavisolibacter
377	GATGAACGCTAGCGGCAGGCCTAACACATGCAAGTCGAGGGGCAGCGGGGAAAAGCTTGCTTTTCCGCCGGCGACCGGCGCACGGGTGCGCAACGCGTATGGAACCTGCCCTTTACAGGG-GCGGTAGAGGATGGCCATGCGTCCCATTAGCTAGTTGGTGCGGTAACGGCGCACCAAGGCCGCGATGGGTAGGGGCCCTGAGAGGGGGATCCCCCACACTGGTACTGAGACACGGACCAG	0.0101771	0	0.0117772	0.031211	0.00641437	0.0202204	0.0161147	0.00876808	0	0	0	0	0.0452591	0.018379	0.0398915	0.0451365	0.0629525	0.0205973	0.0243487	0.0466926	0.0556607	0.0290501	0.0559785	0.0380011	0.0673968	0.0421733	0.0118596	0.0363592	0.0105141	0.0768908	0.0519151	0.0412906	Bacteria	Bacteroidetes	Flavobacteria	Flavobacteriales	Flavobacteriaceae	Arenibacter
378	AGCGAACGCTGGCGGCAGGCCTAACACATGCAAGTCGAGCGCCCGTAGCAATACGGGAGCGGCAGACGGGAGAGTAACACGTGGGAACGTACCCTTCAGTTCGGAATAACCCGGGGAAAC-TCGCTGAAGGATCGGCCCGCGTCTGATTAGCTAGTTGGTGGGGTAATGGCTCACCAAGGCGACGATCAGTAGCTGGTCTGAGAGGATGATCAGCCTCACTGGGACTGAGACACGGCCCAG	0.0712396	0.0505988	0.0235544	0.031211	0.0192431	0.0151653	0.0322295	0.0613766	0.0444444	0.0554734	0.0549652	0.0503271	0.203666	0.0918949	0.0478698	0.0225683	0.0314762	0.102987	0.0973947	0.0622568	0.100189	0.0387334	0.0335871	0.0506682	0.042123	0.0913756	0.166034	0	0.0420566	0.0629107	0.0865251	0.0648853	Bacteria	Proteobacteria	Alphaproteobacteria	Rhizobiales	Hyphomicrobiaceae	Rhodoplanes
379	GACGAACGCTGGCGGCGTGCCTAACACATGCAAGTCGTGCGAGGACGGCGCCTTCGGGTGTCGAGCCGAGCGGCGGACGGGTGAGTAACACGTGAGTAACCTGCCCCTGTGCGGGGGATA-CCGTGCAGGGAGGGGCTCGCGGCCTATCAGCTAGTTGGTGAGGTGACGGCTCACCAAGGCGACGACGGGTAGGGGGTCTGAGAGGATGGCCCCCCACATTGGGACTGAGACACGGCCCAG	0.0101771	0	0	0.0156055	0.00641437	0.0050551	0	0.00876808	0.0977778	0.0184911	0.10993	0.0503271	0	0.0551369	0.0239349	0.0564207	0.0786906	0	0.0243487	0.0155642	0	0.0581001	0.0111957	0.0443347	0.0084246	0.0492022	0.0355787	0.048479	0	0.0419404	0.0346101	0.0471893	Bacteria	un_Bacteria	un_Bacteria	un_Bacteria	un_Bacteria	un_Bacteria
380	GATGAACGCTAGCGGGAGGCTTAATACATGCAAGTCGAACGGTAACAGGTCCTTCGGGATGCTGACGAGTGGCGGACGGGTGAGTAACGCGTACACGATCTACCCATAAGTCTGGGATAG-TGCTTATGGATGGGTGTGCGTCCTATTAGCTAGTTGGTTGAGGTAACGGCTCACCAAGGCGATGATAGGTAGGGGGCGTGAGAGCGTGGACCCCCACACGGGTACTGAGACACGGACCCG	0.0508854	0.0337325	0.0235544	0.0156055	0.0256575	0.0353857	0	0.00876808	0.106667	0.0739645	0.0916086	0.100654	0.113148	0.0551369	0	0	0	0.061792	0	0.0155642	0.0222643	0.0290501	0.0559785	0.0316676	0.042123	0.0351444	0.0118596	0	0.0525707	0.0209702	0.0115367	0.0294933	Bacteria	Bacteroidetes	Sphingobacteria	Sphingobacteriales	Saprospiraceae	Haliscomenobacter
381	ATTGAACGCTGGCGGCATGCTTTACACATGCAAGTCGAACGGCAGCACGGGGGCAACCCTGGTGGCGAGTGGCGAACGGGTGAGTAATGCATCGGAACGTGTCCTTAAGTGGGGGATAAC-GCGCTTTTGGAGCGGCCGATGTCTGATTAGCTAGTTGGTGAGGTAAAGGCTTACCAAGGCGTCGATCAGTAGCTGGTCTGAGAGGACGACCAGCCACACTGGGACTGAGACACGGCCCAG	0	0	0.16488	0.124844	0.134702	0.146598	0.112803	0.0789128	0	0	0.0183217	0	0	0	0.0079783	0	0.0314762	0.0411946	0.0486973	0.0155642	0.0222643	0.00968335	0	0.012667	0	0	0.0118596	0.0121197	0	0	0.0115367	0.00589866	Bacteria	Proteobacteria	Betaproteobacteria	Nitrosomonadales	Nitrosomonadaceae	Nitrosospira
382	AGCGAACGTTAGCGGCGCGCCTAACACATGCAAGTCGCACGCGAAAGGGGGCAACCCTGAGTAAAGTGGCGCACGGGTGCGTAACACGTAGATAACCTGCCCTTTGAAGGGGGATAACGT-CCGTCAGAGGAGGGGTCTGCGGCCCATCAGCTAGTTGGTGAGGTAATGGCTCACCAAGGCAGAGACGGGTAGCTGGTCTGAGAGGATGATCAGCCACACTGGTACTGGAACACGGACCAG	0	0	0.117772	0	0.14753	0.0252755	0.0644589	0.140289	0	0	0	0	0	0	0	0.0112841	0.0157381	0	0	0.0155642	0.0222643	0.0290501	0	0	0.0084246	0.00702889	0.0118596	0.0363592	0.0105141	0.0349504	0.0230734	0.0117973	Bacteria	Proteobacteria	Deltaproteobacteria	Myxococcales	un_Myxococcales	un_Myxococcales
383	AGCGAACGCTGGCGGCAGGCTTAACACATGCAAGTCGAACGCTCGTAGCAATACGAGAGTGGCAGACGGGTGAGTAACGCGTGGGAACGTACCCTTCAGTTCGGAATAACCCGGGGAAAC-TCGCTGAAGGATCGGCCCGCGTCGGATTAGCTAGTTGGTGAGGTAAAGGCTCACCAAGGCAATGATCCGTAGCTGGTCTGAGAGGACGATCAGCCACACTGGGACTGAGACACGGCCCAG	0.0101771	0	0	0.00780275	0	0	0.0241721	0	0.00888889	0	0	0	0.0226296	0	0.0079783	0	0.0314762	0.0411946	0.0243487	0	0.0111321	0.0290501	0.0223914	0.00633352	0.0084246	0.0210867	0.130455	0.133317	0.136684	0.0489305	0.0807568	0.0648853	Bacteria	Proteobacteria	Alphaproteobacteria	Rhizobiales	un_Rhizobiales	un_Rhizobiales
384	GACGAACGCTGGCGGCGTGCTTAACACATGCAAGTCGAGCGGAAAGGCCCCTTCGGGGGTACTCGAGCGGCGAACGGGTGAGTAACACGTGAGTAACCTGCCCCAGGCTCTGGGATAACC-CCGGCCTGGGATGGGCTCGCGGCCTATCAGCTTGTTGGTGGGGTAATGGCTCACCAAGGCGATGACGGGTAGCCGGCCTGAGAGGGCGACCGGCCACACTGGGACTGAGACACGGCCCAG	0.0508854	0.0505988	0.0235544	0.0156055	0	0.0101102	0.0161147	0.0438404	0.0177778	0.0369822	0.0549652	0	0.0678887	0.0551369	0.0079783	0.0451365	0.0314762	0.0205973	0.0243487	0.077821	0.0111321	0.0290501	0	0.0443347	0.0252738	0.0492022	0.0237192	0.0363592	0	0.0209702	0.0403784	0.0825813	Bacteria	Actinobacteria	Actinobacteria	Actinomycetales	Micromonosporaceae	un_Micromonosporaceae
385	ATTGAACGCTGGCGGCGTGCCTAACACATGCAAGTCGATCGGTAACGCGGGGGCAACCCTGGCGACGAGAGGCGGACGGGTGAGTAATGCTTGGGAATCTGCCTATTAGTGGGGGATAAC-GCGCTAATAGATGAGCCCAAGTCGGATTAGCTAGTTGGTAGGGTAAGGGCCTACCAAGGCAACGATCCGTAACTGGTCTGAGAGGACGACCAGTCACACCGGAACTGAGACACGGTCCGG	0.101771	0.0505988	0.0824402	0.0468165	0.0449006	0.0808816	0.0322295	0.0438404	0.0177778	0.0184911	0.0183217	0.0251636	0.0226296	0.0367579	0.0079783	0.0112841	0	0.0205973	0	0	0.0222643	0	0.0335871	0.0316676	0.0252738	0.0281156	0.0118596	0.0363592	0.0315424	0.00699007	0.0288417	0	Bacteria	Proteobacteria	Gammaproteobacteria	Xanthomonadales	Sinobacteraceae	Steroidobacter
386	GATTAACGCTGGCGGCGTGCATGAGACATGCAAGTCGAACGGACGATCAGGGCTTGCTCTGATCGTTAGTGGCGGACGGCTGAGTAACGCGTAGGTGACCTGCCCCGAAGTGGGGGATAA-GCGCTTCGGGAGGGGCCTGCGTCCGATTAGCTCGTTGGTGGGGTAACGGCTCACCAAGGCGACGATCGGTAGGTGGTCTGAGAGGACGATCACCCAGACTGGGACTGAGACACGGCCCAG	0.0814166	0.0505988	0.0942174	0.0702247	0.0641437	0.0606612	0.0644589	0.0964489	0.115556	0.0924556	0.10993	0.100654	0.0452591	0.0918949	0.119674	0.0789889	0.0629525	0.061792	0.146092	0.155642	0.133586	0.0871502	0.100761	0.0506682	0.0926706	0.0843467	0.142315	0.0848382	0.0841131	0.153782	0.161514	0.129771	Bacteria	Chloroflexi	un_Chloroflexi	un_Chloroflexi	un_Chloroflexi	un_Chloroflexi
387	GACGAACGCTGGCGGCGTGCTTAACACATGCAAGTCGAGCGGAAAGGCCCTTCGGGGTACTCGAGCGGCGAACGGGTGAGTAACACGTGAGCAACCTGCCCTAGGCTTTGGGATAACCCT-TCGGCCTGGGATGGGCTCGCGGCCTATCAGCTTGTTGGTGGGGTGATGGCCTACCAAGGCGACGACGGGTAGCCGGCCTGAGAGGGCGACCGGCCACACTGGGACTGAGACACGGCCCAG	0.0508854	0.0337325	0.0117772	0.132647	0.121873	0.146598	0.193377	0.113985	0.0177778	0	0.0183217	0.0251636	0.0226296	0.0367579	0	0.0564207	0.0314762	0	0	0.0311284	0.111321	0.0290501	0.0223914	0.0253341	0.042123	0.0562311	0.106736	0.0242395	0.0525707	0.0419404	0.0519151	0.0707839	Bacteria	Actinobacteria	Actinobacteria	Actinomycetales	Micromonosporaceae	Micromonospora
388	GACGAACGCTGGCGGCGTGCTTAACACATGCAAGTCGAGCGGAAAGGCCCTTCGGGGTACTCGAGCGGCGAACGGGTGAGTAACACGTGAGTAACCTGCCCCTGACTCTGGGATAAGCCC-TCGGTCGGGGATGGGCTCGCGGCCTATCAGCTTGTTGGTGGGGTAGTGGCCTACCAAGGCGACGACGGGTAGCCGGCCTGAGAGGGCGACCGGCCACACTGGGACTGAGACACGGCCCAG	0	0	0.141326	0	0.00641437	0	0.0241721	0	0.00888889	0	0.0183217	0	0	0	0.566459	0.0225683	0	0.0205973	0	0.0155642	0.0111321	0.00968335	0	0.00633352	0.0084246	0	0	0.0242395	0	0.0139801	0.0115367	0.0117973	Bacteria	Actinobacteria	Actinobacteria	Actinomycetales	Streptosporangiaceae	Nonomuraea
389	AACGAACGCTGGCGGCAGGCTTAACACATGCAAGTCGAACGCCCTCTTCGGAGGGAGTGGCAGACGGGTGAGTAACACGTGGGAACCTACCTAGGGGTACGGAATAACTCGGGGAAACTC-TCGCCCCTAGATGGGCCCGCGCTGGATTAGCTAGTTGGTGGGGTAAAAGCTCACCAAGGCGACGATCCATAGCTGGTCTGAGAGGATGATCAGCCACACTGGGACTGAGACACGGCCCAG	0.132302	0.101198	0.0824402	0.0702247	0.0898012	0.050551	0.0483442	0.0350723	0.0444444	0	0	0.0251636	0.0226296	0.0551369	0.0079783	0.0338524	0	0.0205973	0.0243487	0.0311284	0	0.0290501	0.0111957	0.00633352	0.0252738	0.0281156	0.0355787	0.0242395	0	0.0279603	0.0346101	0	Bacteria	Proteobacteria	Alphaproteobacteria	Rhizobiales	Rhodobiaceae	Parvibaculum
390	AATAAACGCTGGCGGCGTGCCTAACACATGCAAGTCGCACGAGAAAGGGACTTCGGTCCCGAGTAAAGTGGCGCACGGGTGAGTAACGCGTAGGTAACCTGCCCCCGGGGTTGGGATAAC-GCGCTCGGGGATGGGCCTGCGTCCTATCAGCTGGTTGGTAGGGTAACGGCCTACCAAGGCGACGACGGGTAGCTGGTCTGAGAGGATGATCAGCCACACTGGCACTGGAACACGGGCCAG	0.132302	0.168663	0.0706631	0.0546192	0.0320718	0.0353857	0.0161147	0.0789128	0.0977778	0.0554734	0.0916086	0.0251636	0.0905182	0.0551369	0.0398915	0.0451365	0.0314762	0	0.0243487	0.0155642	0	0.0290501	0.0111957	0.012667	0	0.0140578	0.0474383	0.0242395	0.0210283	0.0419404	0.0346101	0.0117973	Bacteria	Proteobacteria	Deltaproteobacteria	Syntrophobacterales	Syntrophobacteraceae	un_Syntrophobacteraceae
391	GATAAACGCTGGCGGCGTGCCTAATGCATGCAAGTCGAACGGGAGCGGCTTCGGCCGTCGACCGTGGCGGACGGGTGAGGAGCACGTAGCTGACCTGCCCCGACCCGGGGGATAGTCGCC-CCGGGTTGGGAGGGGGCTGCGGCGGATTAGCTGGATGGCGGGGTAACGGCCCACCATGGCGATGATCCGTAGCTGGTCTGAGAGGACGATCAGCCACACGGGGACTGAGACACGGCCCCG	0.0101771	0.0337325	0.0117772	0.00780275	0.00641437	0.0050551	0.0322295	0.0175362	0.0444444	0	0.0549652	0.0503271	0.0226296	0.018379	0.0239349	0.0564207	0.0472144	0	0	0.0311284	0.0222643	0.0774668	0.0223914	0.0316676	0.0084246	0.0210867	0.0355787	0.0242395	0.0315424	0.090871	0.0576834	0.035392	Bacteria	Chloroflexi	Thermomicrobia	Sphaerobacterales	Sphaerobacteraceae	Sphaerobacter
392	AATGAACGTTGGCGGCGCGCCTAACACATGCAAGTCGAACGAGAAAGTTCCTTCGGGAGCGAGTACAGTGGCGAACGGTTGAGTAACACGTGAGAATCTACCCTTTAGTGGAGAATACTC-TCGCTAGAGGATGAGCTTGCGGCCTATCAGCTAGTTGGTGAGGTAAAGGCTTACCAAGGCGATGACGGGTAGCCGGCCTGAGAGGGTGATCGGCCAGACTGGAACTTAGACACGGTCCAG	0.0101771	0	0.0588859	0.0468165	0.0256575	0.0353857	0.00805737	0.0263043	0	0	0.0183217	0	0	0.018379	0.0079783	0.0789889	0.0629525	0	0.0243487	0.0155642	0.0445286	0.1162	0.0223914	0.0506682	0.0084246	0.0210867	0.0118596	0.0363592	0.0105141	0.0419404	0.0288417	0.035392	Bacteria	Proteobacteria	Deltaproteobacteria	un_Deltaproteobacteria	un_Deltaproteobacteria	un_Deltaproteobacteria
393	AACGAACGCTGGCGGCATGCCTAACACATGCAAGTCGAGCGCCCGGTTTCGGCCGGGAGCGGCGCACGGGTGAGTAACGCGTGGGAACCTGCCCCGGGGTGGGGGATAACCGGTGGAAAC-TCGCCCTGGGAGGGGCCCGCGTCCGATTAGCTAGTTGGTGGGGTAACGGCTCACCAAGGCGACGATCGGTAGCTGGTCTGAGAGGATGATCAGCCACACTGGGACTGAGACACGGCCCAG	0.0610625	0.0505988	0.0235544	0	0.0320718	0.0252755	0.00805737	0.0175362	0.0266667	0.0739645	0.0732869	0.100654	0.0226296	0.018379	0.0239349	0.0451365	0	0.0205973	0.0243487	0.0311284	0.0445286	0	0.0335871	0.0190006	0.0252738	0.0210867	0.0237192	0.0121197	0.0420566	0.0489305	0.0288417	0.0589866	Bacteria	Proteobacteria	Alphaproteobacteria	Rhodospirillales	un_Rhodospirillales	un_Rhodospirillales
394	GACGAACGCTGGCGGCGCGCCTAACACATGCAAGTCGAGGGAGAACCACCTCTTCGGGGGTGGGGAGACCGGCGAACGGGTGAGTAACACGTGAGGAACCTACCCTGTAGTCCGGAATAA-CCGCTACAGGATGGCCTCGCGGCCTATCAGCTTGTTGGTGGGGTAACGGCCTACCAAGGCGACGACGGGTAGCTGGCGTGAGAGCGCGACCAGCCACACTGGGACTGAGACACGGCCCAG	0.0305312	0.0505988	0.0353315	0.0858302	0.0769724	0.050551	0.0805737	0.175362	0	0	0.0183217	0	0.0452591	0.0551369	0.0159566	0	0.0157381	0	0.0243487	0.0155642	0.0111321	0.0193667	0.0223914	0.0190006	0	0.0421733	0	0.0121197	0.0210283	0.0419404	0.0115367	0	Bacteria	Actinobacteria	Actinobacteria	un_Actinobacteria	un_Actinobacteria	un_Actinobacteria
395	GACGAACGCTGGCGGCGTGCTTAACACATGCAAGTCGAACGATGAAGCCGGGAGCTTGCTCCTGGTGGATTAGTGGCGAACGGGTGAGTAACACGTGAGTAACCTGCCCTTCACTCTGGA-TCGGTGAGGGATGGACTCGCGGCCTATCAGCTAGTTGGTGAGGTAATGGCTCACCAAGGCGACGACGGGTAGCCGGCCTGAGAGGGTGACCGGCCACACTGGGACTGAGACACGGCCCAG	0.0203542	0.0505988	0.0353315	0	0.0192431	0.0252755	0.00805737	0.0263043	0.08	0.0554734	0.0549652	0.0251636	0.0905182	0.128653	0.119674	0.0451365	0.0157381	0.061792	0.073046	0.0622568	0.0445286	0.0484168	0.0223914	0.0443347	0.042123	0.0913756	0.0592979	0.0242395	0.0420566	0.0559206	0.0288417	0.0589866	Bacteria	Actinobacteria	Actinobacteria	Actinomycetales	Microbacteriaceae	un_Microbacteriaceae
396	AATCAACGCTGGCGGCGTGCCTCAGACATGCAAGTCGAACGATTAAAGCTCTCTTCGGAGAGTGCATAGAGTGGCGCACGGGTGAGTAACACGTAAGTAATCTACCTTCGAGTGGGGAAT-TCGCTTGAAGAGGAGCTTGCGGCAGATTAGCTAGTTGGTAAGGTAATGGCTTACCAAGGCTACGATCTGTAACCGGTCTAAGAGGACGGTCGGTCACACTGACACTGAATAACGGGTCAG	0.0508854	0.0505988	0.0588859	0.0468165	0.0513149	0.0303306	0.0483442	0.0350723	0.124444	0.129438	0.0732869	0.0754907	0.113148	0.0918949	0.119674	0.101557	0.141643	0.061792	0.0973947	0.077821	0.111321	0.0968335	0.15674	0.0570017	0.0673968	0.0562311	0.0830171	0.0121197	0.0841131	0.0699007	0.0634518	0.035392	Bacteria	Acidobacteria	Acidobacteria_Gp4	Acidobacteria_Gp4	Acidobacteria_Gp4	Gp4
397	AACGAACGCTGGCGGCATGCCTAACACATGCAAGTCGAACGAGACCTTCGGGTCTAGTGGCGCACGGGTGCGTAACGCGTGGGAACCTGCCCTTAGGTTCGGAATAACTCCCCGAAAGGG-TCGCCTTTGGATGGGCCCGCGTTGGATTAGCTAGTTGGTGGGGTAATGGCCTACCAAGGCGACGATCCATAGCTGGTCTTAGAGGATGATCAGCCACACTGGGACTGAGACACGGCCCAG	0.0610625	0.101198	0.0235544	0.0156055	0.0192431	0.0101102	0.0161147	0	0.0177778	0.0369822	0.0916086	0.0251636	0.0226296	0.0918949	0.0319132	0.0677048	0.0472144	0.123584	0.0486973	0.0622568	0.0333964	0.0193667	0.0447828	0.0380011	0.0336984	0.0492022	0.0355787	0.048479	0.0210283	0.0489305	0.017305	0.017696	Bacteria	Proteobacteria	Alphaproteobacteria	Sphingomonadales	Erythrobacteraceae	Porphyrobacter
398	ATTGAACGCTGGCGGCATGCCTAACACATGCAAGTCGAACGGTAACAGGCCCTTCGGGGTGCTGACGAGTGGCGGACGGGTGAGTAATACGTAGGAATCTGCCTAGTAGTGGGGGATAAC-GCGCTATTAGATGAGCCTACGTCGGATTAGCTTGTTGGTGGGGTAAAGGCCTACCAAGGCGACGATCCGTAGCTGGTCTGAGAGGACGATCAGCCACACTGGGACTGAGACACGGCCCAG	0	0	0.0117772	0.00780275	0.109044	0.0252755	0.410926	0.210434	0	0	0	0	0	0	0.0159566	0.0338524	0.0314762	0.0205973	0.0243487	0	0.0445286	0.0677835	0	0.0316676	0.0168492	0.0140578	0.0948767	0.157557	0.136684	0.104851	0.0749885	0.0943786	Bacteria	Proteobacteria	Gammaproteobacteria	un_Gammaproteobacteria	un_Gammaproteobacteria	un_Gammaproteobacteria
399	GACGAACGCTGGCGGCGTGCTTAACACATGCAAGTCGAACGAGGTCCTACTGGTGGCAACACCAGGAAAGACCTAGTGGCGAACGGGTGAGTAACACGTGAGAAACCTGCCCCGAAGACT-CTGCTTCGGGAGGGTCTCGCGGCCTATCAGCTTGTTGGTGAGGTAACGGCTCACCAAGGCGACGACGGGTAGCTGGTCTGAGAGGACGATCAGCCACACTGGGACTGAGACACGGCCCAG	0.0101771	0	0.0353315	0.101436	0.0384862	0.101102	0.0322295	0.0350723	0.00888889	0.0184911	0.0183217	0	0	0.018379	0.0159566	0	0.0157381	0.0411946	0.0243487	0	0	0.0387334	0.0111957	0.00633352	0.042123	0.0351444	0.0118596	0.0363592	0.0210283	0.0489305	0.0576834	0.035392	Bacteria	Actinobacteria	Actinobacteria	Acidimicrobiales	un_Acidimicrobiales	un_Acidimicrobiales
400	ATTGAACGCTGGCGGCATGCTTTACACATGCAAGTCGAACGGGGGTGGGGGCAACTCCACTTCAGTGGCGAACGGGTGAGTAATGCATCGGAACGTGTCCCGTAGTGGGGGATAACGCCG-GTGCTAGGGGAGCGGCCGATGTCCGATTAGCTAGTTGGTGGGGTAATGGCTCACCAAGGCAACGATCGGTAGCTGGTCTGAGAGGATGATCAGCCACACTGGGACTGAGACACGGCCCAG	0	0.0168663	0	0.0234082	0.00641437	0.0050551	0.00805737	0.0350723	0.0266667	0.0184911	0.0183217	0.0503271	0.0226296	0.0367579	0.0398915	0.0225683	0.0472144	0.0411946	0.073046	0.077821	0.0556607	0.0484168	0.0447828	0.0380011	0.0168492	0.0773178	0.0118596	0.0605987	0.073599	0.0419404	0.0634518	0.0825813	Bacteria	Proteobacteria	Betaproteobacteria	un_Betaproteobacteria	un_Betaproteobacteria	un_Betaproteobacteria
401	AACGAACGTTAGCGGCGCGCCTAATACATGCAAGTCGTGCGAGAAAGGGCTTCGGCCCCGGTAAAGCGGCGCACGGGTGAGTAACACGTAGGTAATCTGCCCTCGAGTGGTGGATAACCC-GCGCTCGAGGATGAGCCTGCGGCCCATCAGCTAGTTGGTAGGGTAACGGCCTACCAAGGCGAAGACGGGTAGCTGGTCTGAGAGGATGAACAGCCACACTGGAACTGAGACACGGTCCAG	0.162833	0.354191	0.0471087	0.0468165	0.0320718	0.0202204	0.0322295	0.0438404	0.0177778	0.0184911	0.0366435	0.0754907	0.0905182	0.110274	0.0398915	0	0.0157381	0.0205973	0	0.0311284	0.0222643	0.0193667	0.0335871	0.00633352	0.0084246	0.0351444	0.0237192	0.0363592	0.0105141	0.0209702	0.00576834	0.017696	Bacteria	Proteobacteria	Deltaproteobacteria	Myxococcales	un_Myxococcales	un_Myxococcales
402	GATGAACGCTGGCGGCGTGCCTAATACATGCAAGTCGAACGCGAAAGGTCTGAAGCCTTCGGGCGGAGGGCCGAGTAGAGTGGCGAACGGGTGAGGAACACGTAGGTGACCTGCCCCGGA-GCGCTCCGGGAGGGGCCTGCGGCCCATCAGCTAGTTGGTAGGGTAAAGGCCTACCAAGGCGAAGACGGGTAGGGGGCCTGAGAGGGTGGTCCCCCACATGGGAACTGAGACACGGCCCAG	0.0814166	0.0168663	0.0235544	0.0468165	0.0320718	0.0050551	0.0241721	0.0263043	0.0622222	0.129438	0.0549652	0.0754907	0.113148	0.0551369	0.0718047	0.101557	0.0472144	0.061792	0.0973947	0.0466926	0.0667928	0.1162	0.0447828	0.0633352	0.0926706	0.0421733	0.0830171	0.0363592	0.0525707	0.0768908	0.0346101	0.0825813	Bacteria	Chloroflexi	Anaerolineae	Anaerolineales	Anaerolineaceae	un_Anaerolineaceae
403	ATTGAACGCTGGCGGCGTGCCTAACACATGCAAGTCGAGCGGCAGCGCGGGGGCAACCCTGGCGGCGAGCGGCGGACGGGTGAGCAATATTTGGGAATCTGCCTATTAGTGGGGGATAAC-GCGCTAATAGATGAGCCCAAACCGGATTAGCTAGTTGGTGAGGTAATGGCTCACCAAGGCGACGATCCGTAGCTGGTCTGAGAGGACGACCAGCCACACTGGGACTGAGACACGGCCCAG	0.0101771	0	0.0117772	0.0468165	0.0769724	0.111212	0.0402868	0.0438404	0.0177778	0.0369822	0.0549652	0	0.0226296	0.018379	0.0319132	0.0451365	0.0314762	0.0205973	0.0243487	0.0466926	0.0111321	0.0193667	0.0335871	0.0443347	0.0252738	0.0210867	0	0.0242395	0.0315424	0.0209702	0.0230734	0.0235946	Bacteria	Proteobacteria	Gammaproteobacteria	Xanthomonadales	Sinobacteraceae	Steroidobacter
404	AACGAACGTTAGCGGCGCGCCTAATACATGCAAGTCGCACGAGAAAGGGCTTCGGCCCCGGTACAGTGGCGCACGGGTGAGTAACACGTAGGCAATCTACCCTCGAGTGGTGGATAACCC-ACGCTTGAGGTTGAGCCTGCGGCCCATCAGGTAGTTGGTAGGGTAATGGCCTACCAAGCCTAAGACGGGTAGCTGGTCTGAGAGGATGAACAGCCACACTGGAACTGAGACACGGTCCAG	0	0	0.117772	0	0.0705581	0.0101102	0.0805737	0.0789128	0	0	0	0	0	0	0.0478698	0.0338524	0.0157381	0	0	0	0.0222643	0.0581001	0.0335871	0.0190006	0.0084246	0.00702889	0.0474383	0.0242395	0.0420566	0.0279603	0.0230734	0.0412906	Bacteria	Proteobacteria	Deltaproteobacteria	Myxococcales	un_Myxococcales	un_Myxococcales
405	AACGAACGCTGGCGGCAGGCTTAACACATGCAAGTCGAACGCGTGTAGCAATACACGAGTGGCGCACGGGTGAGTAACGCGTGGATATCTGCCTTTTGGTTCGGAATAACCTTGGGAAAC-TCGCCAAAAGATGAGTCCGCGTCCGATTAGCTAGTTGGTGAGGTAACGGCTCACCAAGGCGACGATCGGTAGCTGGTCTGAGAGGACGATCAGCCACACTGGGACTGAGACACGGCCCAG	0.0203542	0.0168663	0.0706631	0.00780275	0.121873	0.0657163	0.112803	0.0526085	0	0	0.0183217	0.0503271	0.0226296	0	0.0239349	0.0338524	0	0.0205973	0	0	0.0222643	0.00968335	0.0111957	0.012667	0.0168492	0.00702889	0.0118596	0.0121197	0.0210283	0.00699007	0.017305	0.0117973	Bacteria	Proteobacteria	Alphaproteobacteria	un_Alphaproteobacteria	un_Alphaproteobacteria	un_Alphaproteobacteria
406	AACGAACGCTGGCGGCATGCTTAACACATGCAAGTCGAACGATCCCTTCGGGGATAGTGGCGAACGGGTGAGTAACGCGTGGGGACCTGCCCTGGAGTGGGGGATAACCGCTGGAAACGG-GCGCTTTGGGAGGGGCCCGCGTCCGATTAGCTTGTTGGTGGGGTAACGGCCTACCAAGGCGACGATCGGTAGCTGGTCTGAGAGGATGATCAGCCACACTGGGACTGCGACACGGCCCAG	0.101771	0.067465	0.0471087	0.031211	0.0256575	0.0151653	0.0161147	0.0175362	0.0444444	0.0739645	0.0366435	0.0503271	0	0.0367579	0.0239349	0.0225683	0.0314762	0	0.0486973	0.0155642	0.0445286	0.0484168	0	0.012667	0.0336984	0.0281156	0.0830171	0.0242395	0.0105141	0.0209702	0.0115367	0	Bacteria	Proteobacteria	Alphaproteobacteria	Rhodospirillales	un_Rhodospirillales	un_Rhodospirillales
407	AATGAACGCTGGCGGCGTGCTTAACACATGCAAGTCGAGCGAGGCCAGGGGGGCAACTCCCTGAGTCGAGCGGCGGACGGGTGAGTAACACGTGGGTAACCTACCCGGAAGTGGGGAATA-GCGCTACCGGATGGGCCCGCGCCCGATTAGCTAGTTGGTGAGGTAACGGCTCACCAAGGCGACGATCGGTAACCGGCCTGAGAGGGCGATCGGTCACACCGGAACTGAGACACGGTCCGG	0.0101771	0	0.0117772	0.0234082	0	0.0050551	0.0161147	0.0263043	0.0266667	0.0184911	0.164896	0	0.0452591	0.018379	0.0319132	0.0338524	0.0314762	0.0205973	0	0.0311284	0.077925	0.0871502	0.0223914	0.0253341	0.0084246	0.00702889	0.0830171	0.0242395	0.0315424	0.0419404	0.017305	0.017696	Bacteria	Acidobacteria	Acidobacteria_Gp7	Acidobacteria_Gp7	Acidobacteria_Gp7	Gp7
408	GATGAACGCTGGCGGCGTGCTTAACACATGCAAGTCGAACGATGATCCCAGCTTGCTGGGGGATTAGTGGCGAACGGGTGAGTAACACGTGAGTAACCTGCCCTTAACTCTGGGATAAGC-GTGGTTTTGGATGGACTCGCGGCCTATCAGCTTGTTGGTGAGGTAATGGCTCACCAAGGCGACGACGGGTAGCCGGCCTGAGAGGGTGACCGGCCACACTGGGACTGAGACACGGCCCAG	0.0203542	0.0337325	0.0235544	0.0780275	0.0384862	0.0404408	0.0402868	0.0438404	0.0177778	0.0184911	0.0366435	0.0503271	0.0226296	0	0.0239349	0.0225683	0.0157381	0.0205973	0	0	0.0222643	0.00968335	0.0111957	0.0253341	0.042123	0.0492022	0.0355787	0.0242395	0	0.0419404	0.0403784	0.035392	Bacteria	Actinobacteria	Actinobacteria	Actinomycetales	Micrococcaceae	Arthrobacter
409	AGCGAACGCTGGCGGCAGGCTTAACACATGCAAGTCGAGCGCCCCGCAAGGGGAGCGGCAGACGGGTGAGTAACACGTGGGAACGTACCCTTCAGTTCGGAACAACCCAGGGAAACTTGG-TCGCTGAAGGATCGGCCCGCGTCTGATTAGCTAGTTGGTGAGGTAATGGCTCACCAAGGCTACGATCAGTAGCTGGTCTGAGAGGATGATCAGCCACATTGGGACTGAGACACGGCCCAA	0.0305312	0.0337325	0.0235544	0.0546192	0.0449006	0.0202204	0.0402868	0.0263043	0.0355556	0	0.0183217	0	0.0226296	0	0.0159566	0.0451365	0.0157381	0	0.0486973	0.0155642	0.0111321	0.0484168	0.0223914	0.0190006	0.042123	0.0210867	0.0474383	0.0363592	0.0210283	0.0419404	0.0230734	0.0235946	Bacteria	Proteobacteria	Alphaproteobacteria	Rhizobiales	Hyphomicrobiaceae	Rhodoplanes
410	GACGAACGCTGGCGGCGTGCTTAACACATGCAAGTCGAACGAGGTACGAGGAGCTTGCTCCTCGTAACCGAGTGGCGAACGGGTGAGTAACACGTGACCAACCTATCCCAGGGTGGGGGA-TCGCCCAGGGAGGGGGTCGCGACGTATCAGCTTGTTGGTGGGGTAATGGCCTACCAAGGCTACGACGCGTAGCGGGTCTGAGAGGACGACCCGTCACATTGGGACTGAGATACGGCCCAG	0.0203542	0.0168663	0.0588859	0.0156055	0.0513149	0.0454959	0.0966884	0.0350723	0.0177778	0	0	0	0	0.018379	0.0239349	0.0112841	0.0157381	0.0205973	0.0486973	0.0155642	0.0222643	0.00968335	0.0111957	0.0253341	0.0168492	0.0562311	0.0118596	0.0242395	0.0420566	0.0209702	0.017305	0.0235946	Bacteria	un_Bacteria	un_Bacteria	un_Bacteria	un_Bacteria	un_Bacteria
411	AATCAACGCTGGCGGCGTGCCTAACACATGCAAGTCGAACGCGAAAGGGGAGCAATCCCTGAGTAGAGTGGCAAACGGGTGAGTAACACGTGGGTGACCTGCCTTCGAGTGGGGGATAAC-GCGCTTGAAGAGGGGCCCGCGCCTGATTAGCTAGTTGGTGGGGTAATGGCTCACCAAGGCTACGATCAGTATCCGGCCTGAGAGGGCGGACGGACACACTGGGACTGAGACACGGCCCAG	0.0508854	0.0168663	0.0353315	0.062422	0.0128287	0.0454959	0.0161147	0.0613766	0.0355556	0	0	0.0251636	0.0226296	0	0.0239349	0.0225683	0.0157381	0.0411946	0	0	0.0222643	0.0193667	0.0111957	0.0316676	0.0252738	0.0281156	0.0118596	0.0242395	0.0105141	0.0279603	0.0634518	0.0707839	Bacteria	Acidobacteria	Acidobacteria_Gp6	Acidobacteria_Gp6	Acidobacteria_Gp6	Gp6
412	AACGAACGCTGGCGGCGTGGATAAGACATGCAAGTCGAGCGAGATTTTTTCTTGTAGCAATACAGGGAAAAGTCTAGCGGCGAACGGGTGCTTAACACGTGGGCAACCTGCCGTGAAGTG-ACGCTTCTTGTGGGGCCCGCGGCCTATCAGCTAGTTGGTGAGGTAACGGCTCACCAAGGCTTTGACGGGTAGCTGGTCTGAGAGGACGACCAGCCACACTGGGACTGAGACACGGCCCAG	0	0	0.0117772	0	0	0.0050551	0.00805737	0	0.0355556	0.0554734	0.0916086	0.0251636	0.0905182	0.0367579	0.0319132	0.0677048	0.0314762	0.0205973	0.0243487	0.0155642	0.0445286	0.0484168	0.0447828	0.0316676	0.0673968	0.0492022	0.0118596	0.0242395	0.0210283	0.0419404	0.0288417	0.0589866	Bacteria	Verrucomicrobia	Spartobacteria	Spartobacteria	Spartobacteria	Spartobacteria_g.i.s.
413	ATTGAACGCTGGCGGCAGGCCTAACACATGCAAGTCGAGCGCGAAAGTCTTCGGATGAGTAGAGCGGCGAACGGGTGAGTAACGCGTAGGAATTTGCCCAGTAGTGGGGGACAACATCTC-GCGCTATTGGAGAAGCCTGCGTTGGATTAGCTTGTTGGTGGGGTAATGGCCTACCAAGGCGACGATCCATAGCTGGTCTGAGAGGATGATCAGCCACACCGGAACTGAGACACGGTCCGG	0.0101771	0.067465	0.105995	0.031211	0.0513149	0.0404408	0.0644589	0.0701447	0	0.0184911	0.0183217	0.0251636	0.0226296	0	0.0239349	0.0225683	0	0.0411946	0	0.0622568	0	0.00968335	0.0447828	0.0443347	0	0.00702889	0	0.0242395	0.0210283	0.0279603	0.017305	0	Bacteria	Proteobacteria	Gammaproteobacteria	Alteromonadales	Alteromonadaceae	Haliea
414	AACGAACGCTGGCGGCATGCCTAACACATGCAAGTCGAACGATCCCTTCGGGGATAGTGGCGGACGGGTGAGTAACGCGTGGGAACCTGCCCTCAGGTACGGAATAACCTCGGGAAACTG-TCGCCTGGGGATGGGCCCGCGTCAGATTAGCTAGTTGGTGAGGTAACGGCTCACCAAGGCGACGATCTGTAGCTGGTTTGAGAAGATGATCAGCCACACTGGGACTGAGACACGGCCCAG	0.0915937	0.118064	0.0706631	0.0468165	0.0513149	0.0353857	0.0161147	0.0175362	0.0533333	0	0.0549652	0.0251636	0.0452591	0.0367579	0.0239349	0.0225683	0.0314762	0	0.0243487	0.0622568	0.0556607	0.0193667	0.0223914	0.00633352	0.0336984	0.00702889	0.0237192	0	0.0525707	0.0349504	0.0230734	0.0294933	Bacteria	Proteobacteria	Alphaproteobacteria	Rhodospirillales	Rhodospirillaceae	un_Rhodospirillaceae
415	AACGAACGCTGGCGGCAGGCCTAACACATGCAAGTCGAACGTGAAGCCACCTTCGGGTGGTGGAAAGTGGCAGACGGGTGAGTAACGCGTGGGAACGTGCCTTTCGGTTCGGGATAACCC-TTGCCGAAAGATCGGCCCGCGTCGGATTAGCTAGTTGGTGGGGTAAAAGCCTACCAAGGCGACGATCCGTAGCTGGTCTGAGAGGATGACCAGCCACACTGGGACTGAGACACGGCCCAG	0	0.0168663	0.0235544	0.00780275	0.0449006	0.0454959	0.0644589	0.0175362	0.0177778	0.0184911	0	0.0251636	0.0452591	0.0367579	0.0957396	0.0225683	0.0157381	0.0411946	0	0.0311284	0.0445286	0.0387334	0.0447828	0.0316676	0.0084246	0.0281156	0	0.0605987	0.0210283	0.0699007	0.0115367	0.0707839	Bacteria	Proteobacteria	Alphaproteobacteria	Rhizobiales	un_Rhizobiales	un_Rhizobiales
416	ATTGAACGCTGGCGGAATGCTTTACACATGCAAGTCGAGCGGCAGCGCGGGGCAACCTGGCGGCGAGCGGCGAACGGGTGAGTAATGCATCGGAACATGTCCATGTCGTGGGGGATAGCC-GCGCGATTGGGTTGGCCGATGTCCGATTAGCTAGTTGGCGGGGTAAGAGCCCACCAAGGCGATGATCGGTAGCTGGTCTGAGAGGATGATCAGCCACACTGGGACTGAGACACGGCCCAG	0.0305312	0.067465	0.0235544	0.00780275	0	0	0.0322295	0.00876808	0.0355556	0.0184911	0.0732869	0	0.0452591	0.0367579	0.0159566	0.0451365	0.0472144	0.0205973	0.073046	0.0466926	0.0445286	0.00968335	0.0671742	0.0316676	0.0252738	0.0281156	0.106736	0.109078	0.115656	0.0699007	0.0634518	0.0530879	Bacteria	Proteobacteria	Betaproteobacteria	un_Betaproteobacteria	un_Betaproteobacteria	un_Betaproteobacteria
417	AATCAACGCTGGCGGCGTGCCTAACACATGCAAGTCGAACGCGAAAGCCCCGCAAGGGGTAAGTAGAGTGGCAAACGGGTGAGTAACACGTGGGTGACCTGCCTCAGAGTGGGGGATAAC-GCGCTTGGAGAGGGGCCCGCGGCCGATTAGCTAGTTGGTGAGGTAACGGCTCACCAAGGCGACGATCGGTATCCGGCCTGAGAGGGCGGACGGACACACTGGGACTGAGACACGGCCCAG	0.0203542	0	0.0353315	0.0156055	0.0320718	0.0050551	0.0322295	0.0350723	0.0622222	0.0739645	0.0366435	0	0.0452591	0.0367579	0.0558481	0.0225683	0.141643	0.0411946	0.073046	0.0622568	0.0667928	0.0290501	0.0559785	0.0506682	0.0589722	0.0702889	0.0237192	0.0363592	0.0210283	0.0699007	0.017305	0.0117973	Bacteria	Acidobacteria	Acidobacteria_Gp6	Acidobacteria_Gp6	Acidobacteria_Gp6	Gp6
418	GATGAACGCTAGCGGCAGGCCTAACACATGCAAGTCGAGGGGCAGCGGGGTGCTTGCACCGCCGGCGACCGGCGCACGGGTGAGCAACGCGTACAGAACCTGCCCGTTACAGGGGGACAG-TCGGTAACGGATGGCTGTGCGTCCCATTAGTTAGTTGGCAGGGTAACGGCCTACCAAGACGTCGATGGGTAGGGGCCCTGAGAGGGGGATCCCCCACACTGGTACTGAGACACGGACCAG	0.0203542	0.0843313	0	0.00780275	0	0	0.00805737	0.0438404	0.0177778	0.0369822	0.0732869	0.0251636	0.158407	0.018379	0.0319132	0.0564207	0.0157381	0.061792	0	0.0466926	0.0333964	0.0193667	0.0335871	0.0316676	0.084246	0.0281156	0.0118596	0.0242395	0.0210283	0.0489305	0.0288417	0.035392	Bacteria	Bacteroidetes	Flavobacteria	Flavobacteriales	Flavobacteriaceae	Arenibacter
419	ATTGAACGCTGGCGGCATGCCTAACACATGCAAGTCGAACGGTAACGCGGGGGCAACCCTGGCGACGAGTGGCGGACGGGTGAGTAATACGTAGGAATCTGCCCATTAGTGGGGGACAAC-GCGCTAATGGATGAGCCTACGTCGGATTAGCTAGTTGGTAGGGTAAAAGCCTACCAAGGCGACGATCCGTAGCTGGTCTGAGAGGACGATCAGCCACACTGGGACTGAGACACGGCCCAG	0.0101771	0	0.0942174	0.031211	0.0577293	0.0101102	0.161147	0.0876808	0	0.0184911	0.0183217	0	0.0226296	0	0.0159566	0	0.0157381	0.0411946	0	0	0.0111321	0.00968335	0.0223914	0	0	0.00702889	0.0355787	0.0363592	0.0841131	0.0139801	0.0288417	0.035392	Bacteria	Proteobacteria	Gammaproteobacteria	un_Gammaproteobacteria	un_Gammaproteobacteria	un_Gammaproteobacteria
420	GACAAACGCTGGCGGCGTGCATAAAACATGCAAGTCGGACGAGCCAATCCCCGCAAGGGGAAAGGCTAGTGGCGAACGGCTGAGTAACACGTAGGTGACCTGCCCTGAAGTGGGGGATAA-ACGCTTTAGGAGGGGCCTGCGGCGGATTAGCTAGTTGGTGAGGTAATGGCCCACCAAGGCTTCGATCCGTAGCTGGTCTGAGAGGATGGCCAGCCAGACTGGGACTGAGACACGGCCCAG	0.0203542	0	0.0117772	0.00780275	0.0192431	0.0252755	0.0322295	0.00876808	0.00888889	0	0	0.0251636	0.0452591	0.0367579	0.0239349	0.0112841	0.0157381	0.0205973	0.0243487	0.0466926	0.0667928	0.0193667	0.0223914	0.0190006	0.0168492	0.0351444	0.0355787	0.0605987	0.0525707	0.0209702	0.0403784	0.0530879	Bacteria	un_Bacteria	un_Bacteria	un_Bacteria	un_Bacteria	un_Bacteria
421	AATCAACGCTGGCGGCGTGCCTCAGACATGCAAGTCGAACGATTAAGACTCCCTTCGGGGAGTGTATAAAGTGGCGCACGGGTGAGTAACACGTAAGTAATCTACCTTCGAGTGGGGAAT-TCGCTTGAAGAGGAGCTTGCGGCAGATTAGCTAGTTGGTAAGGTAATGGCTTACCAAGGCTACGATCTGTATCCGGTCTAAGAGGACGGTCGGACACACTGACACTGAATAACGGGTCAG	0.0101771	0.0168663	0.0235544	0.0156055	0.0256575	0.0202204	0.0241721	0.0701447	0	0.0184911	0.0366435	0	0.0678887	0.018379	0.0398915	0.0112841	0.0157381	0.0205973	0.0243487	0.0466926	0.077925	0.0290501	0.0335871	0.0633352	0.0673968	0.0140578	0.0118596	0.048479	0.0630848	0.0209702	0.0115367	0.0235946	Bacteria	Acidobacteria	Acidobacteria_Gp4	Acidobacteria_Gp4	Acidobacteria_Gp4	Gp4
422	AACGAACGCTGGCGGCAGGCTTAACACATGCAAGTCGAACGGATGTAGCAATACATCAGTGGCAGACGGGTGAGTAACACGTGGGAACCTTCCTCGTTGTACGGGACAACTCAGGGAAAC-TCGCAATGAGACGGGCCCGCGTCGGATTAGCTAGTTGGTGGGGTAACGGCCTACCAAGGCGACGATCCGTAGCTGATCTGAGAGGATGATCAGCCACACTGGGACTGAGACACGGCCCAG	0.0203542	0	0.0588859	0.0156055	0.0128287	0.0050551	0.0241721	0.0263043	0.0977778	0.0554734	0.0549652	0.0754907	0.0678887	0	0.0638264	0.0564207	0.125905	0.061792	0.073046	0.0622568	0.0445286	0.0387334	0.0559785	0.0316676	0.042123	0.0492022	0.0592979	0.121197	0.0946273	0.0629107	0.0922935	0.0648853	Bacteria	Proteobacteria	Alphaproteobacteria	Rhizobiales	un_Rhizobiales	un_Rhizobiales
423	GACGAACGCTGGCGGCGTGCTTAACACATGCAAGTCAAGGGGGCTCGTAGCAATACGGGCAACCGGCGAACGGGTGCGTAACACGTGAGCAACCTGCCGATCTGCGGGGGATAGCCGGCC-GGGCAGATCGAGGGGCTCGCGGCCTATCAGCTAGTTGGCGGGGTAATGGCCCACCAAGGCACCGACGGGTAGCTGGTCTGAGAGGATGGCCAGCCACATTGGGACTGAGAAACGGCCCAG	0.0101771	0.0337325	0.0117772	0	0.0128287	0.0050551	0	0.0175362	0.0444444	0.0554734	0.0549652	0.0503271	0.158407	0.0735159	0.0478698	0.0564207	0.0472144	0.0205973	0.073046	0.0622568	0.0222643	0.0193667	0.0559785	0.0570017	0	0.0421733	0.0118596	0.048479	0.0841131	0.0419404	0.017305	0.0412906	Bacteria	Gemmatimonadetes	Gemmatimonadetes	Gemmatimonadales	Gemmatimonadaceae	Gemmatimonas
424	GACGAACGCTGGCGGCGTGCTTAACACATGCAAGTCGAACGGAAAGGCTCCTTCGGGGGTACTCGAGTGGCGAACGGGTGAGTAACACGTGGGTGATCTGCCCTGCACTTTGGGATAAGC-GCGGTGTGGGATGGGCCCGCGGCCTATCAGCTTGTTGGTGGGGTGATGGCCTACCAAGGCGACGACGGGTAGCCGGCCTGAGAGGGTGTCCGGCCACACTGGGACTGAGATACGGCCCAG	0.0305312	0	0	0.031211	0.0192431	0.0050551	0.0564016	0.0175362	0.0444444	0.0184911	0	0.0503271	0.0226296	0.018379	0.0159566	0.0338524	0.0314762	0	0.0486973	0	0.0111321	0.0484168	0.0223914	0.0316676	0.0168492	0.0210867	0.0592979	0.0242395	0.0630848	0.0559206	0.0230734	0.0412906	Bacteria	Actinobacteria	Actinobacteria	Actinomycetales	Mycobacteriaceae	Mycobacterium
425	GATGAACGCTGGCGGCGTGCCTAACACATGCAAGTCGAACGGTGCCTTCGGGCACAGTGGCGAACGGGTGCGTAACACGTGGAGGACCTGCCCTGGAGACGGGGATAACCACTGGAAACG-GCGCTCCAGGAGGGCTCCGCGGCCTATCAGCTGGTTGGTGGGGTAACGGCTCACCAAGGCGATGACGGGTAGCTGGCCTGAGAGGGTGGTCAGCCACATGGGGACTGAGAGACGGCCCCA	0.0407083	0.0168663	0.0117772	0.031211	0.0192431	0.0101102	0.00805737	0.0526085	0.08	0.0924556	0.0916086	0.0754907	0.113148	0.110274	0.0319132	0.0338524	0	0.0205973	0.0973947	0.0622568	0.0445286	0.0290501	0	0.0380011	0.042123	0.0281156	0.0118596	0.048479	0	0.0419404	0.0461467	0.0530879	Bacteria	Chloroflexi	un_Chloroflexi	un_Chloroflexi	un_Chloroflexi	un_Chloroflexi
426	GACGAACGCTGGCGGCGTGCTTAACACATGCAAGTCGAACGATGAAGCCCTTCGGGGTGGATTAGTGGCGAACGGGTGAGTAACACGTGGGCAATCTGCCCTTCACTCTGGGACAAGCCC-GCGGTGAAGGATGAGCCCGCGGCCTATCAGCTTGTTGGTGGGGTAATGGCCTACCAAGGCGACGACGGGTAGCCGGCCTGAGAGGGCGACCGGCCACACTGGGACTGAGACACGGCCCAG	0.0712396	0.118064	0.141326	0.117041	0.0513149	0.0606612	0.0725163	0.113985	0.0444444	0.0924556	0.0732869	0.0251636	0.0452591	0	0.079783	0.0225683	0.0157381	0.123584	0.0486973	0.077821	0.0111321	0.0193667	0.0111957	0.0506682	0.042123	0.0913756	0	0.0121197	0.0210283	0.0419404	0.0807568	0.0294933	Bacteria	Actinobacteria	Actinobacteria	Actinomycetales	Streptomycetaceae	Streptomyces
427	AGCGAACGCTGGCGGCGTACTTAACACATGCAAGTCGAACGAGGATCATCGGTGTAGCAATACATTGTTGGTCCTAGTGGCGCACGGGTGAGTAACACGTGGGTGACCTGCCCTGGAGCT-CCGCTCTTGGAGGGGCTCGCGGCCTATCAGCTAGTTGGCGGGGTAACGGCCCACCAAGGCTATGACGGGTAGCTGGTCTGAGAGGACGACCAGCCACACGGGGACTGAGACACGGCCCCG	0	0	0.0588859	0.0234082	0	0.0151653	0.0241721	0.0613766	0.0355556	0.0369822	0.0183217	0.0503271	0.0452591	0.018379	0.0398915	0	0.0472144	0.0205973	0.0243487	0.0311284	0.0333964	0	0.0671742	0.0380011	0.0252738	0	0.0237192	0	0.073599	0.0419404	0.0230734	0.0294933	Bacteria	un_Bacteria	un_Bacteria	un_Bacteria	un_Bacteria	un_Bacteria
428	ATTGAACGCTGGCGGCATGCCTTACACATGCAAGTCGAACGCGAAAGCGGGGCAACCCGCAAGTAGAGTGGCGAACGGGTGAGTAATACATCGGAACGTATCCAGTAGCGGGGGATAACC-GCACTATTGGAGCGGCCGATGTCGGATTAGCTAGTTGGTGGGGTAAAAGCTTACCAAGGCGACGATCCGTAGCTGGTCTGAGAGGACGATCAGCCACACTGGAACTGAGACACGGTCCAG	0	0.0168663	0.0117772	0	0.0256575	0.0252755	0.0886311	0.0613766	0	0	0	0	0	0	0	0.0112841	0	0.0205973	0	0.0155642	0	0.00968335	0.0335871	0.0190006	0.0336984	0.0210867	0.106736	0.109078	0.0630848	0.0139801	0.0403784	0.0294933	Bacteria	Proteobacteria	Betaproteobacteria	un_Betaproteobacteria	un_Betaproteobacteria	un_Betaproteobacteria
429	GATGAACGCTGGCGGCGTGCCTAATACATGCAAGTCGTGCGGGATCTTCGGATCCAGCGGCGAACGGGTGAGTAACACGTGGGCAACCTGCCCCTAAGACTGGGATAACTTCGAGAAATC-CCACTTAGGGATGGGCCCGCGGCGCATTAGCTAGTTGGTGAGGTAACGGCTCACCAAGGCGACGATGCGTAGCCGACCTGAGAGGGTGATCGGCCACACTGGGACTGAGACACGGCCCAG	0.0101771	0	0	0	0.0256575	0.0202204	0.00805737	0.0263043	0.106667	0.0554734	0.10993	0.0503271	0.0452591	0.018379	0.0398915	0.0564207	0.0314762	0	0.0243487	0.0622568	0.0222643	0.0193667	0.0223914	0	0.0168492	0.06326	0.0474383	0.0605987	0.0105141	0.0838809	0.109599	0.0707839	Bacteria	Firmicutes	Bacilli	Bacillales	Thermoactinomycetaceae 1	Thermoflavimicrobium
430	ATTGAACGCTGGCGGAATGCTTTACACATGCAAGTCGAACGGCAGCACGGGAGCTTGCTCCTGGTGGCGAGTGGCGAACGGGTGAGTAACATATCGGAACGTACCTAGTAATGGGGGATA-GCGTTATTAGAGCGGCCGATATCTGATTAGCTAGTTGGTGGGGTAAAAGCCTACCAAGGCGACGATCAGTAGCTGGTCTGAGAGGACGACCAGCCACACTGGAACTGAGACACGGTCCAG	0.0203542	0.0337325	0.0588859	0.0234082	0.121873	0.0353857	0.0564016	0.0526085	0.00888889	0	0.0366435	0.0251636	0.0226296	0.0367579	0.0319132	0	0.0157381	0.0411946	0	0.0311284	0.0445286	0.0581001	0.0111957	0.00633352	0.0505476	0.0140578	0.0118596	0.0121197	0.0315424	0	0	0.017696	Bacteria	Proteobacteria	Betaproteobacteria	un_Betaproteobacteria	un_Betaproteobacteria	un_Betaproteobacteria
431	AGTGAACGCTGGCGGCAGGCCTAACACATGCAAGTCGAACGGCAGCACAGGAGAGCTTGCTCTCCGGGTGGCGAGTGGCGGACGGGTGAGGAATACATCGGAATCTGCCTATTTGTGGGG-GCGCAGATAGATGAGCCGATGTCGGATTAGCTAGTTGGAGGGGTAATGGCCCACCAAGGCGACGATCCGTAGCTGGTCTGAGAGGATGATCAGCCACACTGGGACTGAGACACGGCCCAG	0.0814166	0.0337325	0.0471087	0.109238	0.0769724	0.121322	0.0241721	0.0175362	0.00888889	0.0184911	0	0	0.0452591	0	0.0398915	0.0225683	0.0314762	0	0	0.0155642	0	0.0193667	0.0111957	0.0380011	0.0168492	0	0	0	0.0210283	0.0209702	0.017305	0.00589866	Bacteria	Proteobacteria	Gammaproteobacteria	Xanthomonadales	Xanthomonadaceae	Luteimonas
432	GGCGAACGCTGGCGGCGGGCCTAACACATGCAAGTCGTACGCGGGGTTCTCCTTCGGGAGAACTGCCGAGTGGCGAACGGGTGCGTAACGCGTAGGTAACCTGCCCTCGAGTGGGGGATA-GCGCTCGAGGATGGGCCTGCGTCGGATTAGCTAGTTGGTGGGGTAACGGCCCACCAAGGCGACGATCCGTAGCTGGTCTGAGAGGACGACCAGCCACACTGGCACTGAGACACGGGCCAG	0.0610625	0.0505988	0.0117772	0.0390137	0.00641437	0.0151653	0.0161147	0.00876808	0.0533333	0.0554734	0.10993	0.0503271	0.0678887	0.018379	0.0239349	0.0451365	0.110167	0	0	0.0311284	0	0.0484168	0.0223914	0.0380011	0.0252738	0.0140578	0.0118596	0.0363592	0.0105141	0.0139801	0.017305	0.00589866	Bacteria	Bacteroidetes	Sphingobacteria	Sphingobacteriales	Rhodothermaceae	Rhodothermus
433	AACGAACGTTAGCGGCGCGCCTAACACATGCAAGTCGAGCGAGAAAGGGCTTCGGCCCCAGTAAAGCGGCGCACGGGTGAGTAACACGTAGGTAATCTACCCCTGGGTGGTGGATAACTC-GCGCCTGGGGATGAGCCTGCGGCCCATCAGCTTGTTGGCGAGGTAAAAGCTCACCAAGGCTACGACGGGTAGCTGGTCTGAGAGGATGAACAGCCACACTGGAACTGAGACACGGTCCAG	0	0.0168663	0.0942174	0.031211	0.0898012	0.0960469	0.104746	0.0350723	0	0	0	0	0	0.018379	0	0.0112841	0	0	0	0	0.0111321	0.0193667	0.0223914	0.00633352	0	0.0140578	0.0118596	0.0121197	0.0210283	0.0279603	0.0115367	0.00589866	Bacteria	Proteobacteria	Deltaproteobacteria	Myxococcales	un_Myxococcales	un_Myxococcales
434	GATAAACGTTGGCGGCGTGCCTAATGCATGCAAGTCGCACGGAGCTTCGGCTCAGTGGCGGACGGGTGAGTAACACGTAGGAACCTGCCCAGAAGTGGGGGATAACTCCTCGAAAGAGGA-GCGCTTCTGGAGGGGCCTGCGGTGGATTAGCTAGTTGGTGGGGTAAAGGCCTACCAAGGCGACGATCCATAACTGGTCTGAGAGGACGGCCAGTCACACTGGGACTGAGACACGGCCCAG	0.0814166	0.0843313	0.141326	0.0546192	0.0384862	0.0606612	0.00805737	0.0350723	0	0.0369822	0.0183217	0.0251636	0.0226296	0	0.0159566	0.0112841	0	0.0411946	0.0243487	0.0155642	0.0111321	0.00968335	0.0111957	0.0190006	0.0168492	0.00702889	0.0237192	0.0242395	0.0315424	0.0139801	0.0288417	0.00589866	Bacteria	un_Bacteria	un_Bacteria	un_Bacteria	un_Bacteria	un_Bacteria
435	GATGAACGCTGGCGGCGTGCTTAACACATGCAAGTCGAACGATGAAGGGAGCTTGCTCCTGGATTAGTGGCGAACGGGTGAGTAACACGTGAGTAACCTGCCCTTGACTCTGGGATAAGC-GTGGTTTTGGATGGACTCGCGGCCTATCAGCTTGTTGGTGGGGTAATGGCCTACCAAGGCGACGACGGGTAGCCGGCCTGAGAGGGTGACCGGCCACACTGGGACTGAGACACGGCCCAG	0.0203542	0.0168663	0.0471087	0.031211	0.0192431	0.0657163	0.0402868	0.0613766	0.00888889	0	0.0183217	0.0251636	0	0.018379	0.0079783	0.0225683	0.0157381	0.0205973	0	0.0155642	0.0333964	0.00968335	0.0111957	0.0190006	0.042123	0.06326	0.0355787	0	0	0.0559206	0.0288417	0.0412906	Bacteria	Actinobacteria	Actinobacteria	Actinomycetales	Micrococcaceae	Arthrobacter
436	AACGAACGCTGGCGGCGTGCCTAACACATGCAAGTCGAACGTGATCAGGCCTTCGGGCCTGTGAAAGTGGCGCACGGGTGAGTAACACGTGGATAATCTGCCTGGTGATCGGGGATAACA-CTGTCATCAGATGAGTCCGCGTCCCATTAGCTAGTTGGTAGGGTAACGGCCTACCAAGGCGACGATGGGTAGCTGGTCTGAGAGGATGATCAGCCACACTGGAACTGAGACACGGTCCAG	0.0610625	0.067465	0.0235544	0.0468165	0.0192431	0.0202204	0.0241721	0.0438404	0.0533333	0.0184911	0.0732869	0.100654	0.0452591	0	0	0.0225683	0	0.0411946	0	0	0.0222643	0.0387334	0.0447828	0.012667	0.0252738	0.0351444	0.0118596	0.0242395	0.0105141	0.0139801	0.0230734	0.0235946	Bacteria	Proteobacteria	Deltaproteobacteria	Desulfuromonadales	Desulfuromonadaceae	Desulfuromonas
437	ATTGAACGCTAGCGGGATGCTTTACACATGCAAGTCGGACGGCAGCGCGAGGTAAGCTTGCTTACCTTGGCGGCGAGTGGCGAACGGGTGAGTAATGTATCGGAACGTGCCCAGTAGCGG-GCACTATTGGAGCGGCCGATATCGGATTAGCTAGTTGGTGGGGTAAAGGCCTACCAAGGCGTCGATCCGTAGCTGGTTTGAGAGGACGACCAGCCACACTGGGACTGAGACACGGCCCAG	0.17301	0.151796	0.0235544	0.0468165	0.0320718	0.0101102	0	0.00876808	0.151111	0.147929	0.0732869	0.100654	0.0226296	0.0735159	0.0398915	0.0225683	0.0472144	0.0823893	0	0.0155642	0.0222643	0.0290501	0.0111957	0.0380011	0.042123	0.0421733	0.0237192	0.0242395	0.0315424	0.0209702	0.0288417	0.0294933	Bacteria	Proteobacteria	Betaproteobacteria	Burkholderiales	Alcaligenaceae	un_Alcaligenaceae
438	ATTGAACGCTGGCGGCATGCCTTACACATGCAAGTCGAACGGCAGCACGAGGGCAACCTTGGTGGCGAGTGGCGAACGGGTGAGTAATACATCGGAACGTGTCTTGAAGTGGGGGATAAC-GTGCTTTTGGAGCGGCCGATGCCTGATTAGCTAGTTGGTAGGGTAAAAGCCTACCAAGGCTACGATCAGTAGCTGGTCTGAGAGGACGGCCAGCCACACTGGGACTGAGACACGGCCCAG	0.0508854	0	0.0353315	0.062422	0.0705581	0.136488	0.0644589	0.0701447	0	0	0	0.0251636	0	0	0.0079783	0.0338524	0.0629525	0.0411946	0.0243487	0.0155642	0.0445286	0.0193667	0	0.0316676	0.042123	0.0140578	0.0118596	0.0121197	0	0.0139801	0.0115367	0.017696	Bacteria	Proteobacteria	Betaproteobacteria	Nitrosomonadales	Nitrosomonadaceae	Nitrosomonas
439	GACGAACGCTGGCGGCGTGCTTAACACATGCAAGTGGAGCGACGAACCGGGCTTCGGCCCGGGGCAAAGCCGCGAACGGGTGAGTATCACGTGGGTAACCTGCCCCGATGACCGGGATAA-CCGCATTGGGATGGGCCCGCGGCCCATTAGCTTGTTGGTGAGGTAAAGGCTCACCAAGGCAACGATGGGTAGCTGGTCTGAGAGGACGATCAGCCACACTGGGACTGAGACACGGCCCAG	0.0101771	0	0	0.00780275	0.0192431	0.0050551	0	0.0175362	0.0444444	0.0184911	0.0732869	0.0251636	0.0226296	0.0551369	0.0478698	0.0112841	0.0314762	0.0205973	0.121743	0.0466926	0.0111321	0.0581001	0.0111957	0.0253341	0.0084246	0.0492022	0.0711575	0.0727185	0	0.0419404	0.115367	0.0412906	Bacteria	Actinobacteria	Actinobacteria	un_Actinobacteria	un_Actinobacteria	un_Actinobacteria
440	ATTGAACGCTGGCGGAATGCTTTACACATGCAAGTCGAGCGGCAGCGCGGGGCAACCTGGCGGCGAGCGGCGAACGGGTGAGTAATGCATCGGAACGTGTCCATGTCGTGGGGGATAGCC-ACGCGATTGGGTCGGCCGATGTCCGATTAGCTAGTTGGCGGGGTAAAGGCCCACCAAGGCGATGATCGGTAGCTGGTCTGAGAGGATGATCAGCCACACTGGGACTGAGACACGGCCCAG	0.0101771	0	0.0353315	0.00780275	0.0256575	0.0252755	0.0161147	0.0175362	0.16	0.0924556	0.0366435	0.176145	0.0226296	0.0551369	0.0239349	0.0677048	0.125905	0.061792	0.073046	0	0.0445286	0.0387334	0.0671742	0.0253341	0.0252738	0.0140578	0.0474383	0.0363592	0.0420566	0.0349504	0.0230734	0.0530879	Bacteria	Proteobacteria	Betaproteobacteria	un_Betaproteobacteria	un_Betaproteobacteria	un_Betaproteobacteria
441	GATGAACGCTAGCGGCAGGCCTAATACATGCAAGCTGAACGGTAAATATTGTAGCAATACGATATGAGAGTAGCGTAAGGGTGCGTAACACGTATGCAATCTGCCCTGTACAGGGGGATA-GCGGTACAGGATGAGCATGCGTCTGATTAGCTAGTTGGTGGTGTAACGGACCACCAAGGCGATGATCAGTAGGGGAACTGAGAGGTTGATCCCCCACACTGGCACTGAGACACGGGCCAG	0	0.0505988	0.0117772	0.00780275	0.00641437	0.0101102	0	0	0.0711111	0.0369822	0.0549652	0.0503271	0.0905182	0.018379	0.0159566	0.0338524	0.0472144	0.0411946	0.0243487	0.0466926	0.0333964	0.0387334	0.0111957	0.0570017	0.0168492	0.0210867	0.0592979	0	0.0315424	0.0279603	0.0230734	0.0235946	Bacteria	Bacteroidetes	Bacteroidetes_i.s.	Bacteroidetes_i.s.	Bacteroidetes_i.s.	Ohtaekwangia
442	GACGAACGCTGGCGGCGCGCCTAACACATGCAAGTCGAACGGTGAACGGAGCTTCGGCTCCGGGATCAGTGGCGAACGGGTGCGTAACACGTGGGCAACCTGCCCCAGACCCTGGGATAA-CCGGTCTGGGATGGGCCCGCGGCCTATCAGCTTGTTGGTGAGGTAACGGCTCACCAAGGCGACGACGGGTAGCTGGTCTGAGAGGACGACCAGCCACACTGGGACTGAGATACGGCCCAG	0.0305312	0	0	0.00780275	0	0	0.00805737	0.00876808	0.0355556	0.0924556	0.0549652	0.0503271	0.0452591	0.0735159	0.0478698	0.0112841	0.0157381	0.0823893	0.0243487	0.0155642	0.0333964	0.0290501	0	0.0253341	0.0252738	0.0140578	0.0474383	0.0121197	0	0.0209702	0.0634518	0.0235946	Bacteria	Actinobacteria	Actinobacteria	un_Actinobacteria	un_Actinobacteria	un_Actinobacteria
443	AGTGAACGCTGGCGGCAGGCCTAACACATGCAAGTCGAACGGCAGCACAGCCCCGCAAGGGGTGGGTGGCGAGTGGCGGACGGGTGAGGAATACATGGGAATCTACCCTGTCGTGGGGGA-GCGCGACTGGATGAGCCCATGTCGGATTAGCTAGTTGGCGGGGTAAAGGCCCACCAAGGCGACGATCCGTAGCTGGTCTGAGAGGATGATCAGCCACACTGGAACTGAGACACGGTCCAG	0.0203542	0.0337325	0.117772	0.0702247	0.109044	0.050551	0.0644589	0.0701447	0.00888889	0.0369822	0	0	0	0	0.0159566	0.0225683	0.0629525	0.0205973	0.0243487	0.0311284	0.0111321	0.0484168	0.0223914	0.012667	0.0252738	0.0140578	0.0355787	0.0121197	0.0105141	0.0209702	0.0288417	0.0235946	Bacteria	Proteobacteria	Gammaproteobacteria	Xanthomonadales	Xanthomonadaceae	Lysobacter
444	AACGAACGCTGGCGGCATGCCTAACACATGCAAGTCGAACGAGACCTTCGGGTCTAGTGGCGCACGGGTGCGTAACGCGTGGGAATCTGCCCTTGGGTTCGGAATAACAGTTAGAAATGA-TCGCCCAGGGATGAGCCCGCGTAGGATTAGGTAGTTGGTGGGGTAATGGCTCACCAAGCCGACGATCCTTAGCTGGTCTGAGAGGATGATCAGCCACACTGGGACTGAGACACGGCCCAG	0.0203542	0.0168663	0	0.0546192	0.0449006	0.0252755	0.0241721	0.00876808	0.00888889	0.0184911	0.0183217	0	0.0226296	0	0.0319132	0.0112841	0.0314762	0.0205973	0.0243487	0.0622568	0.0333964	0.0290501	0.0559785	0.0190006	0.0252738	0.0140578	0.0237192	0.0363592	0.0210283	0.0209702	0.017305	0.00589866	Bacteria	Proteobacteria	Alphaproteobacteria	Sphingomonadales	Sphingomonadaceae	Novosphingobium
445	AGCGAACGCTGGCGGCAGGCTTAACACATGCAAGTCGAGCGGGCGTAGCAATACGTCAGCGGCAGACGGGTGAGTAACGCGTGGGAACGTACCTTTTGGTTCGGGATAACCCAGGGAAAC-TCGCCGAAAGATCGGCCCGCGTCTGATTAGCTAGTTGGTGAGGTAATGGCTCACCAAGGCGACGATCAGTAGCTGGTCTGAGAGGATGATCAGCCACATTGGGACTGAGACACGGCCCAA	0.0203542	0.0843313	0.0235544	0.0858302	0.0705581	0.0556061	0.0483442	0.113985	0.0177778	0	0	0.0251636	0.0226296	0.018379	0.0319132	0.0112841	0	0	0	0.0155642	0.0111321	0.0290501	0	0.00633352	0	0.0281156	0	0	0.0105141	0.00699007	0.00576834	0.0117973	Bacteria	Proteobacteria	Alphaproteobacteria	Rhizobiales	Bradyrhizobiaceae	un_Bradyrhizobiaceae
446	ATTGAACGCTGGCGGCATGCTTTACACATGCAAGTCGAGCGGCAGCGCGGGGCTCAGGCAACTGGGTCCTGGCGGCGAGCGGCGAACGGGTGAGTAATGCATCGGAACGTGTCCCGTAAT-ATGTTAGGGGAGCGGCCGATGTCCGATTAGCTTGTTGGTGGGGTAACGGCCCACCAAGGCTGCGATCGGTAGCTGGTCTGAGAGGATGATCAGCCACACTGGGACTGAGACACGGCCCAG	0.0203542	0.0168663	0.0117772	0.0156055	0.0192431	0.0151653	0	0.0438404	0.0711111	0.0184911	0.0366435	0	0.0226296	0.0367579	0.079783	0.0789889	0.0786906	0.102987	0.0973947	0.0622568	0.133586	0.0677835	0.0783699	0.101336	0.0252738	0.0913756	0.106736	0.0242395	0.12617	0.0629107	0.0692201	0.0825813	Bacteria	Proteobacteria	Betaproteobacteria	un_Betaproteobacteria	un_Betaproteobacteria	un_Betaproteobacteria
447	AACGAACGCTGGCGGCAGGCTTAACACATGCAAGTCGAACGGTCTCTTCGGAGGCAGTGGCAGACGGGTGAGTAACGCGTGGGAATCTACCTAGTTCTACGGAACAACAGAGGGAAACTT-TCGGAATTAGATGAGCCCGCGTAAGATTAGCTAGTTGGTGGGGTAATGGCCTACCAAGGCGACGATCTTTAGCTGGTCTGAGAGGATGATCAGCCACACTGGGACTGAGACACGGCCCAG	0.0101771	0.0337325	0	0.0234082	0.0128287	0.0252755	0.0241721	0.00876808	0.0355556	0	0	0.0503271	0.0452591	0.018379	0.0398915	0.0112841	0.0314762	0.0823893	0.073046	0.0466926	0.0222643	0.0387334	0	0.0190006	0.0673968	0.0351444	0	0	0.0525707	0.0279603	0.0115367	0.017696	Bacteria	Proteobacteria	Alphaproteobacteria	Rhizobiales	Hyphomicrobiaceae	Devosia
448	GACGAACGCTGGCGGCGTGCTTAACACATGCAAGTGGAGCGACGAACCGGGCTTCGGCCCGGGGCAAAGCCGCGAACGGGTGAGTAACACGTGGGTAACCTGCCCCGATGATTGGGACAA-CCGCATCGGGATGGGCCCGCGGCGCATTAGCTTGTTGGTGAGGTAACGGCTCACCAAGGCGACGATGCGTAGCTGGTCTGAGAGGACGATCAGCCACACTGGGACTGAGACACGGCCCAG	0.0508854	0	0.0117772	0.062422	0.0577293	0.0303306	0.0241721	0.113985	0.00888889	0	0.0183217	0.0503271	0.0452591	0.018379	0.0159566	0.0225683	0	0.0205973	0	0.0311284	0.0111321	0.0387334	0	0.00633352	0.0084246	0.0210867	0	0.109078	0	0.0419404	0.0403784	0.0117973	Bacteria	Actinobacteria	Actinobacteria	Solirubrobacterales	un_Solirubrobacterales	un_Solirubrobacterales
449	ATTGAACGCTGGCGGCAGGCCTAACACATGCAAGTCGCACGAGAAAGCCCTTCGGGGTGAGTAGAGTGGCGGACGGGTGAGTAAAGCGAAGGAATTTGCCCAGTAGTGGGGGATAACTCG-GCGCTATTGGAGAAGCCTTCGTCGGATTAGCTAGTTGGTGGGGTAAAGGCCTACCAAGGCGACGATCCGTAGCTGGTCTGAGAGGATGATCAGCCACACCGGAACTGAGACACGGTCCGG	0.0508854	0.067465	0.0588859	0.0468165	0.0320718	0.0454959	0.0402868	0.00876808	0.08	0.0739645	0.0183217	0.0251636	0.0678887	0.0735159	0.0398915	0.0338524	0.0157381	0	0.0243487	0.0155642	0.0222643	0.0677835	0.0783699	0.012667	0.0084246	0.0492022	0.0237192	0.0121197	0	0.0279603	0.0288417	0.0117973	Bacteria	Proteobacteria	Gammaproteobacteria	Gammaproteobacteria_i.s.	Gammaproteobacteria_i.s.	Porticoccus
450	AACGAACGCTGGCGGCGTGCTTAACACATGCAAGTCGAACGTGAAGGGGACTTCGGTCCCTGGAAAGTGGCGCACGGGTGAGTAACACGTGGATAATCTACCCGACGATCCGGGATAACA-CCGTCATCGGATGAGTCCGCGGCCCATTAGCTAGTTGGTGGGGTAATGGCCCACCAAGGCTACGATGGGTAGCTGGTCTGAGAGGATGATCAGCCACACTGGAACTGAGACACGGTCCAG	0.0610625	0.0337325	0.0471087	0.0468165	0.0449006	0.0101102	0.00805737	0.0175362	0.0355556	0.0554734	0.0183217	0.0503271	0.0678887	0.128653	0.0478698	0.0677048	0.0629525	0	0.0243487	0	0.0111321	0.00968335	0.0447828	0.0506682	0.042123	0.0210867	0.0237192	0.0121197	0.0210283	0.0419404	0.0346101	0.0471893	Bacteria	Proteobacteria	Deltaproteobacteria	Desulfuromonadales	Desulfuromonadaceae	Desulfuromonas
451	AACGAACGCTGGCGGCAGGCCTAACACATGCAAGTCGAACGCCCACTTCGGTGGGAGTGGCAGACGGGTGAGTAACACGTGGGAACCTACCTGATGGTACGGAATAACACAGGGAAACTT-TCGCCATCAGATGGGCCCGCGTCGGATTAGCTAGTTGGTGGGGTAATGGCCTACCAAGGCGACGATCCGTAGCTGGTCTGAGAGGATGATCAGCCACACTGGGACTGAGACACGGCCCAG	0	0.0168663	0.0235544	0.0390137	0.0320718	0.0353857	0.0564016	0.0263043	0	0.0184911	0	0	0	0.018379	0.0239349	0.0112841	0	0.0205973	0.0486973	0.0311284	0.0333964	0.0193667	0.0111957	0.012667	0.0252738	0.0140578	0.0118596	0.048479	0.073599	0.0279603	0.00576834	0.0235946	Bacteria	Proteobacteria	Alphaproteobacteria	Rhizobiales	un_Rhizobiales	un_Rhizobiales
452	AATGAACGCTGGCGGCGTGCTTAACACATGCAAGTCGAACGAGGCTGAGGGGGCAACTCCTCAGTTTAGTGGCGGACGGGTGAGTAACACGTGGGTAACCTGCCCGGAAGTGGGGAATAC-GCGCTACCGGATGGGCCCGCGCCCGATTAGCTAGTTGGTGGGGTAACGGCTCACCAAGGCTTCGATCGGTAACCGGCCTGAGAGGGCGATCGGTCACACCGGAACTGAGACACGGTCCGG	0.0203542	0	0	0.00780275	0	0.0202204	0	0	0.0533333	0	0.0366435	0.0503271	0.0452591	0.018379	0.0398915	0.0451365	0.0314762	0.0411946	0.073046	0.0466926	0.0222643	0.0581001	0.0783699	0.0443347	0.0589722	0.0421733	0.0118596	0.0727185	0.0315424	0.0419404	0.0519151	0.0471893	Bacteria	Acidobacteria	Acidobacteria_Gp7	Acidobacteria_Gp7	Acidobacteria_Gp7	Gp7
453	GACGAACGCTGGCGGCGTGCTTAACACATGCAAGTCGAACGGTGATCCGGGTACTTGTACCTGGTGATCAGTGGCGAACGGGTGAGTAACACGTGAGTAACCTGCCCTCCACTCTGGGAT-TCGGTGGAGGATGGACTCGCGGCCTATCAGCTTGTTGGTGAGGTAATGGCTCACCAAGGCGACGACGGGTAGCCGGCCTGAGAGGGCGACCGGCCACACTGGGACTGAGACACGGCCCAG	0.0305312	0.0505988	0.0471087	0.0390137	0.0192431	0.0606612	0.0161147	0.0350723	0.0177778	0	0.0183217	0	0.0226296	0	0.0159566	0.0112841	0.0157381	0	0.073046	0.0155642	0	0.0193667	0	0.00633352	0.042123	0.0281156	0	0.0242395	0	0.0279603	0.0403784	0.017696	Bacteria	Actinobacteria	Actinobacteria	Actinomycetales	un_Actinomycetales	un_Actinomycetales
454	GACGAACGCTGGCGGCGTGCTTAACACATGCAAGTCGAACGGTGAACCAGGGCTTGCCCTGGGGATCAGTGGCGAACGGGTGAGTAACACGTGACCAACCTGCCCCTTGCTCTGGGATAA-TCGGCAAGGGATGGGGTCGCGGCCTATCAGCTTGTTGGTGGGGTAATGGCCTACCAAGGCGACGACGGGTAGCCGGCCTGAGAGGGCGACCGGCCACACTGGGACTGAGACACGGCCCAG	0.0407083	0.118064	0.0706631	0.0780275	0.0320718	0.0758265	0.0402868	0.105217	0.00888889	0.0184911	0.0366435	0.0754907	0	0.018379	0.0159566	0.0112841	0.0157381	0.0205973	0.0973947	0.0466926	0.0333964	0.0387334	0.0223914	0.012667	0	0.0562311	0.0355787	0.0242395	0	0.0279603	0.0403784	0.0884799	Bacteria	Actinobacteria	Actinobacteria	Actinomycetales	un_Actinomycetales	un_Actinomycetales
455	GATAAACGTTGGCGGCGTGCCTAACGCATGCAAGTCGCACGAGAGCTTCGGCTCTAGTGGCGGACGGGTGAGTAACACGTAGGAACCTGCCCGGAAGTGGGGGACAACTCTCCGAAAGGG-GCGCTTCCGGAGGGGCCTGCGGTGGATTAGCTAGTTGGTGGGGTAATGGCCTACCAAGGCGACGATCCATAGCTGGTCTGAGAGGATGGTCAGCCACACTGGGACTGAGACACGGCCCAG	0.0915937	0.101198	0.0235544	0.031211	0.0769724	0.0606612	0.177262	0.0789128	0.00888889	0.0184911	0	0	0	0	0.0079783	0	0.0157381	0.0205973	0	0.0311284	0.0222643	0.0193667	0.0447828	0	0.0084246	0	0.0474383	0.0363592	0.0210283	0.0419404	0.0230734	0.0117973	Bacteria	Chloroflexi	un_Chloroflexi	un_Chloroflexi	un_Chloroflexi	un_Chloroflexi
456	ATTGAACGCTGGCGGCATGCCTTACACATGCAAGTCGAACGGCAGCACGGGGGCAACCCTGGTGGCGAGTGGCGAACGGGTGAGTAATACATCGGAACGTGTCCTGTTGTGGGGGATAAC-GCGCGATTGGAGCGGCCGATGTCCGATTAGCTAGTTGGCGGGGTAAAGGCCCACCAAGGCGACGATCGGTAGCTGGTCTGAGAGGATGATCAGCCACACTGGGACTGAGACACGGCCCAG	0.0101771	0.0337325	0.0353315	0.0234082	0.0256575	0.0303306	0.0241721	0	0.0266667	0.0184911	0.0366435	0.0503271	0.0452591	0.018379	0.0079783	0.0225683	0.0157381	0.0205973	0.0243487	0	0.0222643	0.0193667	0.0447828	0.012667	0.0252738	0.0140578	0.0118596	0	0.0105141	0.0419404	0.0288417	0.035392	Bacteria	Proteobacteria	Betaproteobacteria	un_Betaproteobacteria	un_Betaproteobacteria	un_Betaproteobacteria
457	GATGAACGCTAGCGGCAGGCTTAACACATGCAAGTCGAGGGGCAGCACGGGTAGCAATACCTGGTGGCGACCGGCGCACGGGTGAGTAACGCGTATGCAACCTACCTTCAACTGGGGGAT-GCGGTTGAAGATGGGCATGCGTGCCATTAGTTAGTTGGTGAGGTAACGGCTCACCAAGACAGCGATGGCTACGGGGTCTAAAAGGATGGTCCCGCACACTGGTACTGAGACACGGACCAG	0.17301	0.320459	0.0588859	0.0234082	0.0192431	0.050551	0.0322295	0.0350723	0.0355556	0	0.0366435	0.0251636	0.0226296	0.0551369	0.0398915	0.0225683	0.0157381	0	0	0.0311284	0.0111321	0.00968335	0	0.0190006	0.0084246	0.0140578	0.0118596	0	0.0105141	0	0	0.0117973	Bacteria	Bacteroidetes	un_Bacteroidetes	un_Bacteroidetes	un_Bacteroidetes	un_Bacteroidetes
459	GACGAACGCTGGCGGCGTGCTTAACACATGCAAGTCAAGGGGGCCCAGCAATGGGCAACCGGCGAACGGGTGCGTAACACGTGAGCAACCTACCGAACTGTGGGGGATAGCCGGCCTAAC-GGACAGATCGAGGGGCTCGCGGCCTATCAGCTAGTTGGCGAGGTAACGGCTCACCAAGGCAACGACGGGTAGCTGGTCTGAGAGGATGGCCAGCCACATTGGGACTGAGATACGGCCCAG	0.0203542	0	0.0235544	0.00780275	0	0.0050551	0.0241721	0	0.0622222	0.0369822	0.10993	0.150981	0.0678887	0.0918949	0.0239349	0.0789889	0.0786906	0.061792	0.0486973	0.0466926	0.0667928	0.0290501	0.0111957	0.0316676	0.0084246	0.0140578	0	0.0121197	0.0210283	0.0279603	0.0115367	0.0235946	Bacteria	Gemmatimonadetes	Gemmatimonadetes	Gemmatimonadales	Gemmatimonadaceae	Gemmatimonas
460	GATGAACGCTGGCGGCGTGCTTAACACATGCAAGTCGAACGATGAACCTCACTTGTGGGGGGATTAGTGGCGAACGGGTGAGTAACACGTGAGTAACCTGCCCTTGACTCTGGGATAAGC-GTGGTTTTGGATGGACTCGCGGCCTATCAGCTTGTTGGTGGGGTAATGGCCTACCAAGGCGACGACGGGTAGCCGGCCTGAGAGGGTGACCGGCCACACTGGGACTGAGACACGGCCCAG	0.0101771	0.0337325	0.0117772	0.062422	0.0128287	0.0454959	0.00805737	0.0263043	0.00888889	0	0.0366435	0.0251636	0.0226296	0	0.0319132	0	0.0157381	0.061792	0.073046	0.0466926	0.0111321	0.00968335	0.0223914	0.0316676	0.0168492	0.0421733	0.0118596	0.0242395	0	0.0419404	0.0288417	0.0294933	Bacteria	Actinobacteria	Actinobacteria	Actinomycetales	Micrococcaceae	Arthrobacter
461	GATCAACGCTGGCGGCGTGCCTAATGCATGCAAGTCGAACGGGCTCGCCTTCGGGCGAGTCACGTGGCGGACGGGTGAGGAACACGTGGGCGACCTACCCCGGGGCGGGGGATAGCCGCG-CCACCCTGGGCGGGGCCTGCGGCCGATTAGCTAGTTGGGGGGGTAACGGCTTCCCAAGGCGATGATCGGTAGCTGGTCTGAGAGGACGGCCAGCCACACGGGGACTGAGACACGGCCCCG	0.0508854	0.0337325	0.0117772	0.031211	0.00641437	0.0050551	0.0241721	0.0613766	0.0266667	0	0.0366435	0	0.0226296	0	0.0159566	0.0225683	0.0157381	0.0205973	0.0973947	0.0466926	0.0222643	0	0.0447828	0.0316676	0.0168492	0.0351444	0.0474383	0.133317	0	0.0699007	0.10383	0.0707839	Bacteria	Chloroflexi	Thermomicrobia	Sphaerobacterales	Sphaerobacteraceae	Sphaerobacter
462	AATCAACGCTGGCGGCGTGCCTCAGACATGCAAGTCGAACGCGAAAGTTCCCTTCGGGGGGCAAGTAGAGTGGCGCACGGGTGAGTAACACGTAGGTAATCTACCTTTGGATTGGGAATA-GCGTCTGAAGAGGAGCCTGCGGCAGATTAGCTAGTTGGTAAGGTAACGGCTTACCAAGGCGATGATCTGTAGCCGGCCTGAGAGGGCGGTCGGCCACACTGACACTGACATACGGGTCAG	0.132302	0.067465	0.200212	0.109238	0.153945	0.0960469	0.136975	0.131521	0.124444	0.0369822	0.0732869	0.150981	0.113148	0.110274	0.111696	0.0564207	0.0786906	0.0823893	0.073046	0.077821	0.0890571	0.0581001	0.0671742	0.0886693	0.042123	0.06326	0.0830171	0.0969579	0.0420566	0.0559206	0.0634518	0.0235946	Bacteria	Acidobacteria	Acidobacteria_Gp4	Acidobacteria_Gp4	Acidobacteria_Gp4	Gp4
463	AATCAACGCTGGCGGCGCGCTTAACACATGCAAGTCGGACGAGAAAGCCGGGGCAACCTGGTGAGTACAGTGGCGTACGGGTGAGTAACACGTGGGTGATCTACCCTTGAGTGGGGAATA-GCGCTGAAGGAGGAGCCCGCGGCCGATTAGCTGGTTGGTAGGGTAACGGCCTACCAAGGCTGAGATCGGTAGCCGGCCTGAGAGGGCACACGGCCACACTGGCACTGAAACACGGGCCAG	0.0814166	0.0505988	0.0235544	0.0156055	0.0128287	0.0101102	0.0483442	0.0613766	0.0355556	0.0184911	0.0183217	0	0.0452591	0.018379	0.0239349	0	0.0629525	0	0.0243487	0.0155642	0	0.0193667	0	0.012667	0.0084246	0.0210867	0.0711575	0.0363592	0.0105141	0.00699007	0.0230734	0.0235946	Bacteria	Acidobacteria	Acidobacteria_Gp3	Acidobacteria_Gp3	Acidobacteria_Gp3	Gp3
464	AATCAACGCTGGCGGCGCGCTTAACACATGCAAGTCGAACGAGAAAGTGGAGCAATCCATGAGTAAAGTGGCGTACGGGTGAGTAACACGTGGGTAATCTACCTTTTGGTGGGGAATAAC-TCGCCGAAAGAGGAGCCCGCGGCTGATTAGCTAGTTGGTGAGGTAATGGCTCACCAAGGCTTTGATCGGTAGCCGGCCTGAGAGGGCACACGGCCACACTGGCACTGAAACACGGGCCAG	0.0203542	0	0.0824402	0.0546192	0.0128287	0.0252755	0.0402868	0.0876808	0.0177778	0	0.0549652	0	0.0226296	0	0.0319132	0.0338524	0	0.0205973	0.0243487	0.0622568	0.0445286	0.0484168	0.0223914	0.0316676	0.0252738	0.0421733	0.0474383	0.0242395	0.0210283	0.0629107	0.0461467	0.0530879	Bacteria	Acidobacteria	Acidobacteria_Gp3	Acidobacteria_Gp3	Acidobacteria_Gp3	Gp3
465	ATTGAACGCTGGCGGCAGGCCTAACACATGCAAGTCGAGCGCGAAAGGTCTTCGGGCCGAGTAGAGCGGCGGACGGGTGAGTAATGCGCAGGAATTTGCCCAGTAGTGGGGGATAACGTT-ATGCTATTGGAGGAGCCTGCGTCGGATTAGCTAGTTGGTGGGGTAAAGGCCTACCAAGGCGACGATCCGTAGCTGGTCTGAGAGGATGATCAGCCACACTGGGACTGAGACACGGCCCAG	0.0610625	0.118064	0.0235544	0.0234082	0.0320718	0.0252755	0.0402868	0	0.08	0.0369822	0	0	0.0678887	0.018379	0.0079783	0.0225683	0.0314762	0	0	0.0311284	0	0	0.0111957	0.00633352	0.0336984	0.0140578	0.0237192	0	0	0.0209702	0.0115367	0.0235946	Bacteria	Proteobacteria	Gammaproteobacteria	Gammaproteobacteria_i.s.	Gammaproteobacteria_i.s.	Porticoccus
466	GACGAACGCTGGCGGCGTGCCTAATACATGCAAGTCGAGCGAACCGATAGATTAGCTTGCTATTCTTAAGGTTAGCGGCGGACGGGTGAGTAACACGTGGGCAACCTGCCCTATAGACTG-TCACTATAGGATGGGCCCGCGGCGCATTAGCTAGTTGGTGGGGTAACGGCCTACCAAGGCGACGATGCGTAGCCGACCTGAGAGGGTGATCGGCCACACTGGGACTGAGACACGGCCCAG	0.0101771	0	0	0.00780275	0.0192431	0	0.0322295	0	0.0622222	0.0554734	0.0366435	0.0251636	0.0905182	0.018379	0.0478698	0.0564207	0.0157381	0.0411946	0.0486973	0.0311284	0	0.0387334	0	0.012667	0.0084246	0.0281156	0.0118596	0.0242395	0	0.0209702	0.0634518	0.0412906	Bacteria	Firmicutes	Bacilli	Bacillales	Planococcaceae	Ureibacillus
467	ATTGAACGCTGGCGGAATGCTTTACACATGCAAGTCGAGCGGCAGCGCGGGGCAACCTGGCGGCGAGCGGCGAACGGGTGAGTAATACATCGGAACATGTCCATTTGTGGGGGATAGCCC-GCGCGAATGGTTTGGCCGATGTCCGATTAGCTAGTTGGTGGGGTAAAGGCCTACCAAGGCGATGATCGGTAGCTGGTCTGAGAGGATGATCAGCCACACTGGGACTGAGACACGGCCCAG	0.0508854	0.0168663	0.0235544	0	0.0128287	0.0050551	0.0161147	0	0.0355556	0.0369822	0.10993	0.0754907	0.0452591	0.110274	0.0159566	0.0677048	0	0	0.0243487	0.0311284	0.0222643	0.0290501	0.0447828	0.0190006	0.0252738	0.0140578	0.0118596	0.0121197	0.0630848	0.0209702	0.0346101	0.00589866	Bacteria	Proteobacteria	Betaproteobacteria	un_Betaproteobacteria	un_Betaproteobacteria	un_Betaproteobacteria
468	AATGAACGCTGGTAATATGCCTTAGACATGCAAGTTTAATTTAGGTTAAACAATTTTATTATATTTTTTAAGTATAAAAAATTTGTTTGCTTTGATAGCGTACGGGTGAGTAATATGTAG-TTGCTCATAAAAAGACTTATATCTGATTAGCTAGTTGGTGAGATAAAAGCCCACCAAGGCGATGATCAGTAGCTGGTCTGAGAGGATGAACAGCCACACTGGAATTGAAAAACGGTTCAG	0	0	0	0	0	0	0	0.00876808	0.0444444	0.0184911	0.0183217	0.0251636	0.0452591	0.018379	0.0239349	0.0338524	0	0	0.0243487	0.0311284	0.0111321	0.0290501	0	0.0316676	0.0168492	0.0702889	0	0.048479	0	0.0699007	0.0403784	0.0471893	Bacteria	Proteobacteria	un_Proteobacteria	un_Proteobacteria	un_Proteobacteria	un_Proteobacteria
469	AACGAACGCTGGCGGCATGCCTAACACATGCAAGTCGAACGAGACCTTCGGGTCTAGTGGCGCACGGGTGCGTAACGCGTGGGAATCTGCCCTTCGGTTCGGAATAACAGTTAGAAATGA-TCGCCGAGGGATGAGCCCGCGTAGGATTAGCTAGTTGGTGAGGTAAAGGCTCACCAAGGCGACGATCCTTAGCTGGTCTGAGAGGATGATCAGCCACACTGGGACTGAGACACGGCCCAG	0	0.0168663	0	0.0234082	0.0256575	0.0252755	0.0241721	0.00876808	0.0266667	0.0184911	0	0.0251636	0	0	0.0558481	0.0338524	0	0.061792	0.0486973	0.0155642	0.0222643	0.0290501	0.0447828	0.0380011	0.0168492	0.0281156	0.0237192	0.048479	0.0210283	0.0139801	0.017305	0.017696	Bacteria	Proteobacteria	Alphaproteobacteria	Sphingomonadales	Sphingomonadaceae	Sphingomonas
470	AGTGAACGCTGGCGGCAGGCCTAACACATGCAAGTCGAACGGCAGCACGAGAGAGCTTGCTCTCTTGGTGGCGAGTGGCGGACGGGTGAGGAATACATCGGAATCTGCCCAGTCGTGGGG-GCGCGATTGGATGAGCCGATGTCGGATTAGCTAGTTGGAGGGGTAACGGCCCACCAAGGCGACGATCCGTAGCTGGTCTGAGAGGATGATCAGCCACACTGGGACTGAGACACGGCCCAG	0.0305312	0	0.0353315	0.0234082	0.0192431	0.0151653	0	0.00876808	0	0	0.0183217	0.0754907	0	0.0367579	0	0.0338524	0.0314762	0.0205973	0.0486973	0.0466926	0.0445286	0.0677835	0.0111957	0.012667	0.0168492	0.0562311	0.0118596	0	0.0420566	0.0279603	0	0.0235946	Bacteria	Proteobacteria	Gammaproteobacteria	Xanthomonadales	Xanthomonadaceae	un_Xanthomonadaceae
471	AATCAACGCTGGCGGCGTGCCTAACACATGCAAGTCGAACGCGAAAGTGGAGCAATCCATGAGTAGAGTGGCAAACGGGTGAGTAACACGTGGGTGACCTGCCTTCGAGCGGGGGATAAC-GCACTTGAAGAGGGGCCCGCGCCTGATTAGCTAGTTGGTGGGGTAATGGCTCACCAAGGCAACGATCAGTATCCGGCCTGAGAGGGCGGACGGACACACTGGGACTGAGACACGGCCCAG	0.0610625	0.0168663	0.0117772	0.031211	0.00641437	0.0050551	0	0.00876808	0.08	0.0369822	0.0183217	0	0.0452591	0.0551369	0.0638264	0.0338524	0.0786906	0.0205973	0	0.0155642	0.0222643	0.00968335	0.0223914	0.0316676	0.0084246	0.0492022	0.0237192	0.0242395	0.0420566	0.0209702	0.0288417	0.0117973	Bacteria	Acidobacteria	Acidobacteria_Gp6	Acidobacteria_Gp6	Acidobacteria_Gp6	Gp6
472	GATGAACGCTAGCGGCAGGCCTAATACATGCAAGTCGAACGGCAGCACGAGTAGCAATACTTGGTGGCGAGTGGCGCACGGGTGCGTAACACGTATGCAATCTACCCATAACATGGGGAT-TTGGTTATGGATGAGCATGCGCATGATTAGCTAGTTGGTGAGGTAATGGCTCACCAAGGCGACGATCATTAGGGGGTCTGAGAGGATGATCCCCCACACTGGTACTGAGATACGGACCAG	0.0814166	0.118064	0.0117772	0.0234082	0.0320718	0.0050551	0	0.00876808	0.0444444	0.147929	0.0916086	0.0503271	0.0678887	0.0367579	0.0398915	0.0338524	0.0157381	0	0	0.0466926	0.0222643	0.00968335	0.0111957	0.0253341	0.0336984	0.0351444	0	0.0121197	0	0.0139801	0.017305	0.0235946	Bacteria	Bacteroidetes	Sphingobacteria	Sphingobacteriales	Cytophagaceae	un_Cytophagaceae
473	AATCAACGCTGGCGGCGTGCCTAACACATGCAAGTCGAACGCGAAAGGGGCTTCGGCCCTGAGTAGAGTGGCAAACGGGTGAGTAACACGTGGGTGACCTGCCTCAGAGTGGGGGATAAC-GCGCTTGGAGAGGGGCCCGCGGCCGATTAGCTAGTTGGTGGGGTAATGGCTCACCAAGGCAACGATCGGTATCCGGCCTGAGAGGGCGGACGGACACACTGGGACTGAGACACGGCCCAG	0.0203542	0	0.0117772	0.0156055	0.0128287	0.0303306	0.00805737	0.0263043	0.0266667	0.0184911	0.0183217	0	0	0	0.0079783	0.0225683	0.0314762	0.0205973	0.0243487	0.0311284	0.0222643	0.0193667	0.0111957	0.0253341	0	0.0281156	0.0237192	0.0242395	0.0105141	0.0629107	0.0461467	0.0412906	Bacteria	Acidobacteria	Acidobacteria_Gp6	Acidobacteria_Gp6	Acidobacteria_Gp6	Gp6
474	ATTGAACGCTGGCGGCATGCCTAACACATGCAAGTCGAACGGTAACGCGGGGGCAACCCTGGCGACGAGTGGCGGACGGGTGAGTAATACGTAGGAATCTGCCCATTTGTGGGGGATAAC-GCGCTAATGGATGAGCCTACGTCGGATTAGCTAGTTGGTAGGGTAACGGCCTACCAAGGCGACGATCCGTAGCTGGTCTGAGAGGACGATCAGCCACACTGGGACTGAGACACGGCCCAG	0	0	0	0.0156055	0.0256575	0.0101102	0.0725163	0.0350723	0.00888889	0	0	0	0	0.018379	0.0079783	0	0	0	0	0.0311284	0.0111321	0.00968335	0.0223914	0.00633352	0.0084246	0.00702889	0.0474383	0.0727185	0.157712	0.0349504	0.0403784	0.0294933	Bacteria	Proteobacteria	Gammaproteobacteria	un_Gammaproteobacteria	un_Gammaproteobacteria	un_Gammaproteobacteria
475	GATGAACGCTAGCGGCAGGCCTAACACATGCAAGTCGAGGGGTATACGGTGCTTGCACTGTAGAGACCGGCGCACGGGTGAGTAACGCGTATGGAATCTGCCTTGTACAGGGGAATAGCC-TCGGTACAAGATGATCATGCGTCCCATTAGCTAGTTGGTGTGGTAACGGCACACCAAGGCTACGATGGGTAGGGGCCCTGAGAGGGGGATCCCCCACACTGGTACTGAGACACGGACCAG	0.0915937	0.0337325	0.0235544	0.0546192	0.0256575	0.0252755	0.00805737	0.0263043	0.00888889	0.0184911	0	0.0251636	0.0678887	0.018379	0.0159566	0.0225683	0.0314762	0.0205973	0.0243487	0.0155642	0.0111321	0.0290501	0.0223914	0.0316676	0.0168492	0.0140578	0	0.0121197	0.0210283	0.0209702	0	0.0117973	Bacteria	Bacteroidetes	Flavobacteria	Flavobacteriales	Flavobacteriaceae	Aequorivita
476	GACGAACGCTGGCGGCGTGCTTAACACATGCAAGTCGAGCGAGAAAGCTCCTTCGGGAGTGAGTACAGCGGCGAACGGGTGAGTAACACGTGGGCAACCTGCCCCAAGGAGCGGGACAAC-CCGCCTTGGGATGGGCCCGCGGCGCATTAGCTTGTTGGTGGGGTAACGGCTCACCAAGGCGACGATGCGTAGCTGGTCTGAGAGGACGATCAGCCACACTGGGACTGAGACACGGCCCAG	0.0407083	0.118064	0.0588859	0.093633	0.0128287	0.0454959	0.0161147	0.0964489	0.00888889	0	0.0183217	0.0251636	0.0226296	0	0.0079783	0	0	0.061792	0	0	0	0.00968335	0.0111957	0	0.0168492	0	0	0.0242395	0	0.0209702	0.0115367	0.035392	Bacteria	Actinobacteria	Actinobacteria	Solirubrobacterales	un_Solirubrobacterales	un_Solirubrobacterales
477	GACGAACGCTGGCGGTGCGCCTAACACATGCAAGTCGAACGGTGAACCGGGCTTCGGCCCGGGGATCAGTGGCGAACGGGTGCGTAACACGTGGGCAACCTGCCCCCGACCCTGGGATAA-CCGGTCGGGGATGGGCCCGCGGCCTATCAGCTTGTTGGTGGGGTAACGGCCTACCAAGGCGACGACGGGTAGCTGGTCTGAGAGGACGACCAGCCACACTGGGACTGAGACACGGCCCAG	0	0	0.0117772	0.00780275	0.00641437	0.0050551	0.00805737	0.00876808	0.0266667	0.0369822	0	0	0.0226296	0.110274	0.0159566	0.0564207	0.0629525	0	0.0243487	0.0311284	0.0445286	0.0387334	0.0559785	0.0190006	0	0.0210867	0.0237192	0.048479	0.0105141	0.0349504	0.0576834	0.0294933	Bacteria	Actinobacteria	Actinobacteria	un_Actinobacteria	un_Actinobacteria	un_Actinobacteria
478	AATCAACGCTGGCGGCGTGCCTAACACATGCAAGTCGAACGCGAAAGTCCCGCAAGGGATCAGTAGAGTGGCAAACGGGTGAGTAACACGTGGGTGACCTGCCTTCGAGTGGGGGATAAC-GCGCTCAAAGAGGGGCCCGCGCCTGATTAGCTAGTTGGTGGGGTAACGGCTCACCAAGGCGACGATCAGTATCCGGCCTGAGAGGGCGGACGGACACACTGGGACTGAGACACGGCCCAG	0.0101771	0.0168663	0.0235544	0	0.00641437	0	0.00805737	0	0.0622222	0.0369822	0.0366435	0.0251636	0.0905182	0.018379	0.0478698	0.0225683	0.0786906	0.0411946	0.0486973	0.0155642	0.0333964	0.0193667	0.0447828	0.0443347	0.0168492	0.0281156	0.0474383	0.0363592	0.0210283	0.0349504	0.0230734	0.0235946	Bacteria	Acidobacteria	Acidobacteria_Gp6	Acidobacteria_Gp6	Acidobacteria_Gp6	Gp6
479	GATGAACGCTGGCGGCGTGCTTAACACATGCAAGTCGAACGATGAACCCGGAGCTTGCTCTGGGGGATTAGTGGCGAACGGGTGAGTAACACGTGAGCAACCTGCCCCTGACTCTGGGAT-TCGGTTGGGGATGGGCTCGCGGCCTATCAGCTTGTTGGTGAGGTAATGGCTCACCAAGGCGTCGACGGGTAGCCGGCCTGAGAGGGTGACCGGCCACACTGGGACTGAGACACGGCCCAG	0.0508854	0.0843313	0.0353315	0.0546192	0.0320718	0.111212	0.00805737	0.0876808	0.0355556	0	0.0183217	0.100654	0.0452591	0.0735159	0.0239349	0	0.0314762	0	0.0486973	0.0311284	0.0222643	0.0193667	0.0223914	0.0190006	0.0168492	0.0702889	0.0118596	0.048479	0.0105141	0.0559206	0.0461467	0.0294933	Bacteria	Actinobacteria	Actinobacteria	Actinomycetales	Microbacteriaceae	Microbacterium
480	GATGAACGTTGGCGGCGTGCCTAACACATGCAAGTCGAACGGGAGTCCGATTTCGATCGGATGAGAGTGGCGGACGGGTGCGTAACACGTAGCTCACCTGCCCCGGAGTGCGGGATAACG-TCGCTTCGGGATGGGGCTGCGGCCCATCAGCTAGTTGGTGAGGTAACGGCTTACCAAGGCGACGACGGGTAGGGGGCCTGAGAGGGTGGCCCCCCACACTGGGACTGAGACACGGCCCAG	0.0407083	0.0505988	0.0588859	0.0234082	0.0320718	0.0101102	0.00805737	0.0526085	0.0266667	0.0554734	0.0183217	0	0.0226296	0	0.0239349	0.0451365	0.0157381	0.0205973	0	0	0.0222643	0.00968335	0.0223914	0.00633352	0.0168492	0.00702889	0.0237192	0.048479	0	0.0139801	0.0230734	0.0412906	Bacteria	Chloroflexi	Anaerolineae	Anaerolineales	Anaerolineaceae	un_Anaerolineaceae
481	GACGAACGCTGGCGGCGTGCCTAATGCATGCAAGTCGAACGCGGGGAGCTTGCTCCGCCGCGTGGCGCACGGCTGAGGAACACGTGGGTACCAACCCCGGAGTGGGGGATACCCCATCGA-GCGCTCCGGGACGGGCCTGCGGCCCATCAGGTAGTTGGTGAGGTAATGGCTCACCAAGCCTCTGACGGGTCCCTGGTCTGAGAGGACGACCAGGCAGACTGGGACTGAGACACGGCCCAG	0.0407083	0	0.0353315	0.031211	0.0192431	0.0151653	0.0402868	0.0438404	0.0177778	0.0554734	0.0549652	0.0754907	0.0452591	0.018379	0.0319132	0.0112841	0.0157381	0.0205973	0	0	0.0222643	0.00968335	0	0	0.0252738	0.00702889	0	0.0242395	0	0	0.017305	0.0235946	Bacteria	Chloroflexi	Chloroflexi	Chloroflexales	Chloroflexaceae	un_Chloroflexaceae
482	ATTGAACGCTGGCGGCATGCCTAACACATGCAAGTCGAACGGTAACAGGCCCTTCGGGGTGCTGACGAGTGGCGGACGGGTGAGTAATACGTAGGAATCTGCCCAGTAGTGGGGGATAAC-GCGCTATTGGATGAGCCTACGTCGGATTAGCTAGTTGGTGGGGTAAAGGCCCACCAAGGCGACGATCCGTAGCTGGTCTGAGAGGACGATCAGCCACACTGGGACTGAGACACGGCCCAG	0.0508854	0.101198	0.0117772	0.0546192	0	0.050551	0.0161147	0.0175362	0.0266667	0	0.0183217	0.0251636	0.0452591	0.018379	0.0478698	0	0.0157381	0	0	0	0.0111321	0.00968335	0.0111957	0.012667	0.0084246	0.0140578	0.0355787	0.0242395	0.0105141	0.00699007	0.0346101	0.00589866	Bacteria	Proteobacteria	Gammaproteobacteria	Chromatiales	Ectothiorhodospiraceae	un_Ectothiorhodospiraceae
483	GATGAACGCTAGCGGCAGGCCTAACACATGCAAGTCGAGGGGCATCACGGAAAAGCTTGCTTTTCCGGTGGCGACCGGCGCACGGGTGAGGAGCACGTATGGAACCTGCCCCTGTCAGGG-ATCGGACAGGGATGGCCATGCGCACCATTAGCTTGTTGGGGGGTAACGGCCCACCAAGGCTACGATGGTTAGGGGCCCTGAGAGGGGGATCCCCCACACTGGTACTGAGACACGGACCAG	0	0	0	0.0156055	0.0256575	0.0353857	0.0241721	0.0438404	0.00888889	0	0	0	0	0.018379	0.0478698	0.0225683	0.0157381	0.0205973	0	0.0466926	0.0445286	0.0387334	0.0111957	0.0443347	0	0.0281156	0.0355787	0.0242395	0.0315424	0.0279603	0.0576834	0.00589866	Bacteria	Bacteroidetes	Flavobacteria	Flavobacteriales	Flavobacteriaceae	Muricauda
484	GATGAACGCTAGCGGCAGGCTTAATACATGCAAGTCGAGGGGCAGCACGAATAGCAATATTTGGTGGCGACCGGCAAACGGGTGCGGAACACGTACGCAACCTTCCTTTAAGTGGGGAAT-TCGCTTAAAGATGGGCGTGCGCCTGATTAGGTAGTTGGCGGGGTAACGGCCCACCAAGCCAGCGATCAGTAACTGGTGTGAGAGCACGACCAGTCACACGGGCACTGAGACACGGGCCCG	0.0203542	0	0.0471087	0.0156055	0.0128287	0.0252755	0.00805737	0.0263043	0.0266667	0.0369822	0.0183217	0.0503271	0.0226296	0	0.0239349	0.0225683	0.0157381	0	0.073046	0.0311284	0.0333964	0	0.0223914	0.0190006	0.0336984	0.0281156	0.0355787	0.0242395	0	0.0139801	0.0288417	0.0235946	Bacteria	Bacteroidetes	Sphingobacteria	Sphingobacteriales	Chitinophagaceae	un_Chitinophagaceae
485	GACGAACGCTGGCGGCGTGCTTAACACATGCAAGTCACGGGGGCTCGCAAGAGCAACCGGCGAACGGGTGCGTAACACGTGAGCAATCTGCCGATTTCTGGGGGATAGCCGGCCCAACGG-GGGGAAATCGAGGAGCTCGCGGCCTATCAGCTAGTTGGCGGTGTAATGGACCACCAAGGCTATGACGGGTAGCTGGTCTGAGAGGATGGCCAGCCACATTGGGACTGAGAGACGGCCCAG	0.0101771	0.0168663	0.0117772	0	0.00641437	0	0.00805737	0	0.0533333	0.0184911	0.0549652	0.100654	0.0452591	0.0367579	0.0478698	0.0225683	0.0629525	0.0411946	0.0243487	0.0311284	0	0.00968335	0.0559785	0.0190006	0.0168492	0.0210867	0.0237192	0	0.0315424	0.0279603	0.00576834	0.017696	Bacteria	Gemmatimonadetes	Gemmatimonadetes	Gemmatimonadales	Gemmatimonadaceae	Gemmatimonas
486	AACGAACGCTGGCGGCAGGCTTAACACATGCAAGTCGAGCGGACCCTTCGGGGTCAGCGGCAGACGGGTGAGTAACGCGTGGGAATCTACCCAGCTCTACGGAATAACTCAGGGAAACCT-TCGGAGTTGGATGAGCCCGCGTCGGATTAGCTAGTTGGTGGGGTAATGGCCTACCAAGGCTACGATCCGTAGCTGGTCTGAGAGGATGATCAGCCACACTGGGACTGAGACACGGCCCAG	0	0.0337325	0	0.00780275	0.0192431	0	0	0.0175362	0.0533333	0.129438	0.0916086	0.0503271	0.113148	0.0367579	0.0478698	0.0451365	0.0157381	0.061792	0.0243487	0.0311284	0.0111321	0.0387334	0.0335871	0	0.042123	0.00702889	0.0237192	0.0121197	0.0420566	0.0209702	0.0230734	0.017696	Bacteria	Proteobacteria	Alphaproteobacteria	Rhizobiales	Phyllobacteriaceae	un_Phyllobacteriaceae
487	AACGAACGCTGGCGGCATGCCTAACACATGCAAGTCGAACGAAGCCTTCGGGCTTAGTGGCGCACGGGTGCGTAACGCGTGGGAATCTGCCCTTGGGTACGGAACAACAGTTAGAAATGA-TCGCCCAGGGATGAGCCCGCGTCGGATTAGCTAGTTGGTGAGGTAAAAGCTCACCAAGGCGACGATCCGTAGCTGGTCTGAGAGGATGATCAGCCACACTGGGACTGAGACACGGCCCAG	0	0.0505988	0.0706631	0.093633	0.0705581	0.0454959	0.0402868	0.0438404	0.0444444	0.0369822	0	0.0251636	0.0452591	0.110274	0.0478698	0.0564207	0.0472144	0.0205973	0.0243487	0.0933852	0.0667928	0.0484168	0.0671742	0.0570017	0.0252738	0.0210867	0.0474383	0	0.0630848	0.00699007	0.0346101	0.0648853	Bacteria	Proteobacteria	Alphaproteobacteria	Sphingomonadales	Sphingomonadaceae	un_Sphingomonadaceae
488	AATCAACGCTGGCGGCGTGCCTAACACATGCAAGTCGAACGCGAAAACCCCGCAAGGGGTTAGTAGAGTGGCGAACGGGTGAGTAACACGTGGGTGACCTACCTTCGAATGGGGGATAAC-GCGTTTGAAGAGGGGCCCGCGTCTGATTAGCTAGTTGGTGAGGTAACGGCTCACCAAGGCGACGATCAGTATCCGGCCTGAGAGGGCGGACGGACACACTGGGACTGAGACACGGCCCAG	0.0610625	0.0168663	0.0235544	0.00780275	0.00641437	0.0050551	0.00805737	0	0.0977778	0.0369822	0.0183217	0.0503271	0.0226296	0.018379	0.0478698	0.0564207	0.0314762	0	0.0486973	0.0311284	0.0333964	0.0581001	0.0895656	0.0443347	0.084246	0.0492022	0.0474383	0.048479	0.0630848	0.00699007	0.0519151	0.035392	Bacteria	Acidobacteria	Acidobacteria_Gp6	Acidobacteria_Gp6	Acidobacteria_Gp6	Gp6
489	GATGAACGCTAGCGGCAGGCCTAACACATGCAAGTCGAGGGGCATCACGGAAGAGCTTGCTCTTTTGGTGGCGACCGGCGCACGGGTGAGGAGCACGTATGGAACCTGCCCCTGTCAGGG-TCGGACAGGGATGGCCATGCGCACCATTAGTTAGTTGGCGGGGTAACGGCCCACCAAGGCCACGATGGTTAGGGGCCCTGAGAGGGGGATCCCCCACACTGGTACTGAGACACGGACCAG	0.0203542	0	0.0117772	0.00780275	0.0384862	0.0151653	0.0402868	0.0175362	0	0	0	0	0	0	0.0558481	0.0225683	0.0157381	0	0.0243487	0	0.0111321	0.0387334	0.0111957	0.0190006	0.0084246	0	0.0592979	0.0242395	0.0630848	0.0419404	0.017305	0.017696	Bacteria	Bacteroidetes	Flavobacteria	Flavobacteriales	Flavobacteriaceae	Muricauda
490	GACGAACGCTGGCGGCGCGCTTAACACATGCAAGTCGTACGGGGTCCTTCGGGGCCCAGTGGCGAACGGGTGCGTAACACGTGAGTGACCTGCCCCTGTGCGGGGGATAACCCGGGGAAA-CTGTGCAGGGAGGGGCTCGCGGCGTATCAGGTAGTTGGTGGGGTAATGGCTCACCAAGCCGATGACGCGTAGGGGGTCTGAGAGGATGGCCCCCCACATTGGGACTGAGATACGGCCCAG	0	0	0	0	0.00641437	0	0.0322295	0.0613766	0	0	0.0183217	0	0.0226296	0.018379	0.0319132	0.0338524	0	0.0205973	0	0.0311284	0.0333964	0.0193667	0.0111957	0.0380011	0.0252738	0.0281156	0.106736	0.0848382	0.0841131	0.0559206	0.017305	0.0471893	Bacteria	un_Bacteria	un_Bacteria	un_Bacteria	un_Bacteria	un_Bacteria
491	GACGAACGCTGGCGGCGGGCTTAACACATGCAAGTCGAACGAGAAGCCCCCTTCGGGGGGTGGAAAGTGGCGCACGGGTGAGTAACGCGTAGGCAATCTACCCTTAGCTGGGGGATAACC-GCGGCTAAGGATGAGCCTGCGTTGGATTAGCTAGTTGGTAGGGTAACGGCCTACCAAGGCGATGATCCATAGCGGGTCTGAGAGGATGATCCGCCACACTGGCACTGAGACACGGGCCAG	0	0.0168663	0.0471087	0.0156055	0.00641437	0	0.00805737	0.0263043	0	0	0.0549652	0	0	0	0.0239349	0.0112841	0.0314762	0	0	0	0.0111321	0.0387334	0.0335871	0.0380011	0.0252738	0.0351444	0.0237192	0.0848382	0.0420566	0.0489305	0.0346101	0.0412906	Bacteria	Bacteroidetes	Sphingobacteria	Sphingobacteriales	Rhodothermaceae	un_Rhodothermaceae
492	AACGAACGCTGGCGGCATGCCTAACACATGCAAGTCGAACGGATGGCTTCGGCCATCAGTGGCGCACGGGTGAGTAACGCGTGGGAATCTGCCCAGCAGTGGGGGATAACCTTGGGAAAC-CCGCTGCTGGAGGAGCCCGCGTCGGATTAGGTAGTTGGTGGGGTAATGGCCTACCAAGCCTGTGATCCGTAGCTGGTCTGAGAGGATGATCAGCCACACTGGGACTGAGACACGGCCCAG	0	0.0168663	0	0.00780275	0.0513149	0.0252755	0.0241721	0.0175362	0	0	0.0183217	0	0.0226296	0	0.0239349	0.0338524	0.0314762	0.0411946	0	0	0.0222643	0	0.0223914	0.0253341	0.0168492	0.0210867	0.0474383	0.048479	0.0525707	0.0209702	0.017305	0.0117973	Bacteria	Proteobacteria	Alphaproteobacteria	Rhodospirillales	Acetobacteraceae	Stella
493	GACGAACGCTGGCGGCGTGCTTAACACATGCAAGTCGAGGGCGGGGAGCAATCCCCGACCGGCGAACGGGTGCGTAACACGTGAGCGACCTACCTCCCCGCGGGGGATAGCCGGCCCAAC-GGGCGGGGAGAGGGGCTCGCGGCCTATCAGCTAGTTGGCGGGGTAACGGCCCACCAAGGCGGTGACGGGTAGCTGGTCTGAGAGGATGGCCAGCCACATTGGGACTGAGAGACGGCCCAG	0	0.0337325	0	0.0156055	0	0	0	0.0263043	0.00888889	0	0.0183217	0.0251636	0	0	0.0239349	0.0451365	0.0314762	0	0.0243487	0.0466926	0.0445286	0	0.0335871	0.0633352	0.0589722	0.0281156	0.0355787	0.0121197	0.0525707	0.0209702	0.0230734	0.017696	Bacteria	Gemmatimonadetes	Gemmatimonadetes	Gemmatimonadales	Gemmatimonadaceae	Gemmatimonas
494	ATTGAACGCTGGCGGCATGCCTAACACATGCAAGTCGAACGGTAACAGGCCCTTCGGGGTGCTGACGAGTGGCGGACGGGTGAGTAATACGTAGGAATCTGCCCAATAGTGGGGGACAAC-GCGCTATTGGATGAGCCTACGTCGGATTAGCTAGTTGGTAGGGTAAAAGCCTACCAAGGCGACGATCCGTAGCTGGTCTGAGAGGACGATCAGCCACACTGGGACTGAGACACGGCCCAG	0.0203542	0.0337325	0.0235544	0	0.0192431	0.0303306	0.0564016	0.0701447	0	0	0	0	0	0	0.0319132	0.0225683	0.0157381	0.0205973	0	0.0155642	0.0222643	0.0193667	0.0223914	0.012667	0.0168492	0.0210867	0.0118596	0.048479	0.0420566	0	0.0230734	0.017696	Bacteria	Proteobacteria	Gammaproteobacteria	Chromatiales	Ectothiorhodospiraceae	un_Ectothiorhodospiraceae
495	AATCAACGCTGGCGGCGTGCCTAACACATGCAAGTCGAACGCGAAAGCCCCGCAAGGGGTTAGTAGAGTGGCAAACGGGTGAGTAACACGTGGGTGACCTGCCTCGAAGTGGGGGATAAC-GCGCTTTAAGAGGGGCCCGCGGCCGATTAGCTAGTTGGTGAGGTAACGGCTCACCAAGGCGACGATCGGTATCCGGCCTGAGAGGGCGGACGGACACACTGGGACTGAGACACGGCCCAG	0.0610625	0	0.0117772	0.031211	0	0.0151653	0.00805737	0.00876808	0.0266667	0.0554734	0	0	0.0452591	0.0735159	0.0159566	0	0.0944287	0	0.0243487	0.0155642	0.0222643	0.0193667	0.0447828	0.00633352	0.0252738	0.0210867	0.0474383	0.0121197	0.0315424	0.0209702	0.0346101	0.017696	Bacteria	Acidobacteria	Acidobacteria_Gp6	Acidobacteria_Gp6	Acidobacteria_Gp6	Gp6
496	ATTGAACGCTGGCGGAATGCTTTACACATGCAAGTCGAACGGCAGCACGGGAGCTTGCTCCTGGTGGCGAGTGGCGAACGGGTGAGTAATATATCGGAACATGTCCAATAATGGGGGATA-GCGTTAATGGAGTGGCCGATATCTGATTAGCTAGTTGGTGAGGTAAAGGCTCACCAAGGCGACGATCAGTAGCTGGTCTGAGAGGACGACCAGCCACACTGGAACTGAGACACGGTCCAG	0.0610625	0.067465	0.0117772	0.0390137	0.0513149	0.0151653	0.0241721	0.0263043	0.0177778	0.0369822	0	0.0251636	0.0452591	0.018379	0.0079783	0.0451365	0	0	0	0.0466926	0	0	0	0.00633352	0.0084246	0.00702889	0	0.0242395	0.0210283	0.00699007	0.0115367	0	Bacteria	Proteobacteria	Betaproteobacteria	un_Betaproteobacteria	un_Betaproteobacteria	un_Betaproteobacteria
497	GACGAACGCTGGCGGCGTGCTTAACACATGCAAGTCGAACGATGAACCACCTTCGGGTGGGGATTAGTGGCGAACGGGTGAGTAACACGTGGGCAATCTGCCCTGCACTCTGGGACAAGC-GCGGTGCAGGATGAGCCCGCGGCCTATCAGCTTGTTGGTGAGGTAACGGCTCACCAAGGCGACGACGGGTAGCCGGCCTGAGAGGGCGACCGGCCACACTGGGACTGAGACACGGCCCAG	0.0101771	0.0168663	0	0.0156055	0.00641437	0.0050551	0	0.00876808	0.0177778	0.0184911	0.0183217	0	0	0.018379	0	0.0112841	0.0157381	0.0823893	0.0243487	0.0622568	0	0.0290501	0	0.0570017	0.0336984	0.0773178	0.0237192	0.0121197	0	0.0838809	0.0634518	0.0589866	Bacteria	Actinobacteria	Actinobacteria	Actinomycetales	Streptomycetaceae	Streptomyces
498	GATGAACGCTGGCGGCGTGCTTAACACATGCAAGTCGAACGGTGAAGCAGGAGCTTGCTCTTGTGGATCAGTGGCGAACGGGTGAGTAACACGTGAGCAACCTGCCCCTGACTCTGGGAT-TTGGTTGGGGATGGGCTCGCGGCCTATCAGCTTGTTGGTGAGGTAATGGCTCACCAAGGCGTCGACGGGTAGCCGGCCTGAGAGGGTGACCGGCCACACTGGGACTGAGACACGGCCCAG	0.0610625	0.067465	0.0353315	0.0234082	0.0384862	0.0808816	0.0161147	0.0175362	0.0177778	0.0184911	0.0366435	0	0	0.018379	0.0079783	0.0112841	0.0157381	0.0411946	0	0.0466926	0.0111321	0.0387334	0.0111957	0.012667	0.0084246	0.0140578	0.0118596	0.0121197	0.0105141	0.0279603	0.0230734	0.00589866	Bacteria	Actinobacteria	Actinobacteria	Actinomycetales	Microbacteriaceae	Microbacterium
499	GGTAAACGCTGGCGGCGTGCCTAAAACATGCAAGTCGAACGGATTGTCGCAAGACAGTCAGTGGCAGACGGCTGAGTAACGCGTGGGTGACGTACCTATTGGTGGGGAATAACTGCCCGA-GCGCCGATGGAGCGGCCCGCGTTCGATTAGCTGGTTGGTGGGGTAACGGCCTACCAAGGCGACGATCGATAGCTGGTCTCAGAGGATGATCAGCCAGACTGGGACTGAGACACGGCCCAG	0.0203542	0.0168663	0.0117772	0.00780275	0.00641437	0.0151653	0.0241721	0.00876808	0.00888889	0.0184911	0.0916086	0.0503271	0.0452591	0.0367579	0.0079783	0.0112841	0.0472144	0.061792	0.0243487	0.0155642	0	0.0193667	0.0111957	0.0316676	0.0084246	0.0421733	0	0.0121197	0.0105141	0.0139801	0.017305	0.017696	Bacteria	un_Bacteria	un_Bacteria	un_Bacteria	un_Bacteria	un_Bacteria
500	ATTGAACGCTGGCGGCAGGCCTAACACATGCAAGTCGAGCGGTAACAGGGGAGCTTGCTCCCGCTGACGAGCGGCGGACGGGTGAGTAACGCGCAGGAATCTACCTGGTAGCGGGGGATA-GCACTATCAGATGAGCCTGCGTTGGATTAGCTTGTTGGTGGGGTAAAGGCCCACCAAGGCGACGATCCATAACTGGTCTGAGAGGATGATCAGTCACACCGGAACTGAGACACGGTCCGG	0.0305312	0.0505988	0.0235544	0.00780275	0.0320718	0.0050551	0.0644589	0.00876808	0.0177778	0	0	0	0	0.018379	0.0159566	0.0112841	0.0472144	0.0411946	0.0243487	0.0155642	0.0445286	0.0290501	0.0111957	0.00633352	0	0.00702889	0.0474383	0.0363592	0.0315424	0.0279603	0.017305	0.0235946	Bacteria	Proteobacteria	Gammaproteobacteria	un_Gammaproteobacteria	un_Gammaproteobacteria	un_Gammaproteobacteria
501	ATTGAACGCTGGCGGCGTGCTTAACACATGCAAGTCGATCGGTAACGCGGGGGCAACCCTGGCGACGAGAGGCGGACGGGTGAGGAACGCTTGGGAATCTGCCCTTCAGCGGGGGACAAC-GCACTGAAGGATGAGCCCAAGTCGGATTAGCTAGTTGGCGGGGTAACGGCCCACCAAGGCGACGATCCGTAGCTGGTCTGAGAGGACGATCAGCCACACCGGAACTGAGACACGGTCCGG	0.0101771	0.0168663	0.0353315	0.031211	0.0320718	0.0404408	0.0161147	0	0	0.0184911	0	0.0251636	0	0	0.0319132	0.0112841	0.0314762	0	0	0.0155642	0.0222643	0.0290501	0.0111957	0.0253341	0.0252738	0	0.0474383	0	0.0105141	0.0279603	0.0346101	0.0117973	Bacteria	Proteobacteria	Gammaproteobacteria	Xanthomonadales	Sinobacteraceae	Steroidobacter
502	GACGAACGCTGGCGGCGTGCTTAACACATGCAAGTCGAGCGAGACCCCTTCTTCGGGAGGGTGTTCTAGCGGCGAACGGGTGAGTAACACGTGGGCAACCTGCCCTCAGCTCTGGGATAA-TCGGCTGGGGATGGGCCCGCGGCCTATCAGCTTGTTGGTGGGGTAGTGGCCTACCAAGGCGACGACGGGTAGCCGGCCTGAGAGGGTGACCGGCCACACTGGGACTGAGACACGGCCCAG	0.0712396	0.0843313	0.0353315	0.062422	0.0449006	0.0758265	0.0564016	0.0701447	0.0355556	0.0184911	0.0549652	0.0251636	0.0226296	0	0.0398915	0.0225683	0.0472144	0.0411946	0	0.0311284	0.0222643	0.0387334	0	0.0253341	0.0168492	0.0351444	0.0474383	0.0363592	0	0.0349504	0.0346101	0.0235946	Bacteria	Actinobacteria	Actinobacteria	Actinomycetales	Geodermatophilaceae	Blastococcus
503	GACGAACGCTGGCGGCGCGCTTAACACATGCAAGTCGAGCGAGAACCAGTCCTTCGGGACTGGGGACAGCGGCGAACGGGTGAGTAACACGTGGGTAATCTGCCCTCGATTCTGGGATAG-CCGATCGAGGATGAGCCCGCGGCGGATTAGCTTGTTGGTGGGGTAATGGCCTACCAAGGCGACGATCCGTAGCTGGTCTGAGAGGACGATCAGCCACACTGGGACTGAGACACGGCCCAG	0.0203542	0.0337325	0.0235544	0	0.0128287	0.0050551	0.00805737	0.00876808	0.0177778	0	0.0183217	0.0503271	0.0452591	0.0367579	0.0319132	0.0564207	0.0314762	0.0205973	0	0.0311284	0.0333964	0.0387334	0.0111957	0.0380011	0.0168492	0.0492022	0.0711575	0.0363592	0	0.0768908	0.017305	0.0235946	Bacteria	un_Bacteria	un_Bacteria	un_Bacteria	un_Bacteria	un_Bacteria
504	ATTGAACGCTAGCGGGATGCTTTACACATGCAAGTCGAACGGCAGCGCAAGAGAAGCTTGCTTTTCTTGGCGGCGAGTGGCGAACGGGTGAGTAATATATCGGAACGTGCCCAGTAGCGG-TCACTATTGGAGCGGCCGATATCAGATTAGCTAGTTGGTGGGGTAAAGGCCTACCAAGGCAACGATCTGTAGCTGGTTTGAGAGGACGACCAGCCACACTGGGACTGAGACACGGCCCAG	0.0203542	0.0505988	0.0588859	0.062422	0.0192431	0.0606612	0.0402868	0.0175362	0.0355556	0	0	0	0	0	0.0079783	0	0.0157381	0	0.073046	0.0311284	0.0333964	0.00968335	0.0223914	0	0.0168492	0.0210867	0.0118596	0.0121197	0.0105141	0.00699007	0.017305	0.0117973	Bacteria	Proteobacteria	Betaproteobacteria	Burkholderiales	Alcaligenaceae	Pusillimonas
505	GACGAACGCTGGCGGCGTGCCTAACACATGCAAGTCGAGCGGGGTCCAACTGGGGGCAACCCCAGGGAAGACCTAGCGGCGAACGGGTGAGTAACACGTGAGGAACCTGCCCTGGAGTGC-TCGCTCTGGGAGGGTCTCGCGGCCTATCAGCTAGTTGGTGGGGTAACGGCCCACCAAGGCTACGACGGGTAGCTGGTCTGAGAGGACGATCAGCCACACTGGGACTGAGACACGGCCCAG	0.0305312	0.0168663	0.0588859	0.0468165	0.0577293	0.0454959	0.0241721	0.0789128	0	0	0	0	0	0.018379	0.0159566	0	0	0	0	0.0155642	0	0	0	0.00633352	0	0.0281156	0.0118596	0.0121197	0.0105141	0	0.0115367	0.017696	Bacteria	Actinobacteria	Actinobacteria	Acidimicrobiales	un_Acidimicrobiales	un_Acidimicrobiales
506	AACGAACGCTGGCGGCATGCCTAACACATGCAAGTCGAACGGGATCCGGACTTCGGTCCGGTGAGAGTGGCGGACGGGTGAGTAACACGTGGGAACCTGCCCTTGGGTTCGGGATAACCG-TCGCCTGAGGAGGGGCCCGCGTCCGATTAGGTAGTTGGTGGGGTAAAGGCCTACCAAGCCGACGATCGGTAGCTGGTCTGAGAGGATGATCAGCCACACTGGGACTGAGATACGGCCCAG	0.0101771	0.0337325	0.0471087	0.0390137	0.0256575	0.0252755	0.0886311	0.113985	0	0	0	0.0503271	0	0	0.0159566	0.0112841	0	0.0205973	0.0243487	0.0155642	0.0222643	0.0193667	0.0111957	0.012667	0.0168492	0.0351444	0.0118596	0.0121197	0.0630848	0.0349504	0.0115367	0.035392	Bacteria	Proteobacteria	Alphaproteobacteria	Rhodospirillales	Rhodospirillaceae	Dongia
507	GATTAACGCTAGCGACGTGCCTAAGGTATGCAAGTCGAACGATGAAATTTGCGTAGCAATACAAGAATTTCATAGTGGCAGACGGCTGAGTAACACGTGGGAATCTCCCTCAAACTCGAG-GCGGTTTGAGATGAGCCCGCGTCCTATCAGGTTGTTGGTGGGGTAATGGCCTACCAAGCCTATAACGGGTAACTGGTCTGAGAGGATGGCCAGTCAGACTGGGACTGAGACACGGCCCAG	0.0101771	0	0	0	0.0128287	0	0	0	0.0888889	0.203402	0.0732869	0.0251636	0.0905182	0.0551369	0.0398915	0.0225683	0.0472144	0.0205973	0	0.0311284	0.0333964	0.0387334	0.0111957	0.0380011	0.0084246	0.0210867	0.0118596	0	0.0105141	0.0139801	0.00576834	0.0235946	Bacteria	un_Bacteria	un_Bacteria	un_Bacteria	un_Bacteria	un_Bacteria
508	ATTGAACGCTGGCGGCATGCTTAACACATGCAAGTCGAACGGCAGCACAGTGTGTAGCAATACACATGGGTGGCGAGTGGCGGACGGGTGAGTAATGAGTAGGAATCTGCCCTGTAGTGG-GCGCTATAGGATGAGCCTACTTCCGATTAGCTAGTTGGCGGGGTAATGGCCCACCAAGGCGACGATCGGTAGCTGGTCTGAGAGGGCGACCAGCCACACTGGGACTGAGACACGGCCCAG	0.122125	0.0505988	0	0.0156055	0.0192431	0.0303306	0.00805737	0.0175362	0.106667	0.0369822	0.0366435	0.0251636	0	0.0551369	0.0239349	0.0225683	0	0.0205973	0	0.0622568	0.0111321	0.00968335	0.0111957	0.012667	0	0.0281156	0.0118596	0	0.0210283	0.0209702	0.017305	0.00589866	Bacteria	Proteobacteria	Gammaproteobacteria	un_Gammaproteobacteria	un_Gammaproteobacteria	un_Gammaproteobacteria
509	GACGAACGCTGGCGGCGTGCTTAACACATGCAAGTCGAACGGTGAACCAGGGCTTGCCCTGGGGATCAGTGGCGAACGGGTGAGTAACACGTGACCAACCTGCCCTTGGCTCTGGGATAA-TCGGCCAAGGATGGGGTCGCGGCCTATCAGCTTGTTGGTGGGGTAATGGCCTACCAAGGCGACGACGGGTAGCCGGCCTGAGAGGGCGACCGGCCACACTGGGACTGAGACACGGCCCAG	0.0203542	0.0505988	0.0235544	0.031211	0.0320718	0.0303306	0.0241721	0.0263043	0	0	0	0	0	0	0.0159566	0	0	0.0205973	0	0.0311284	0.0111321	0.0193667	0.0223914	0.012667	0.0168492	0.0351444	0	0.0242395	0.0105141	0.0349504	0.017305	0.0235946	Bacteria	Actinobacteria	Actinobacteria	Actinomycetales	un_Actinomycetales	un_Actinomycetales
510	GATGAACGCTGGCGGCGTGCCTAATACATGCAAGTCGAACGGGGAGTTCGCAAGGGCTTCCAGTGGCGAACGGGTGAGTAACGCGTGGGTGACCTGCCCCAAAGCGGGGGATAACAGCTC-CCGCTTTGGGAGGGGCCTGCGTCCCATCAGCTAGTTGGTCGGGTAACGGCTGACCAAGGCGATGACGGGTAGGGGACCTGAGAGGGTGATCCCCCACACTGGCACTGAAACACGGGCCAG	0	0.0168663	0	0.031211	0.00641437	0.0050551	0.00805737	0.0350723	0.0977778	0.0739645	0.183217	0.150981	0.0905182	0.0918949	0.0478698	0.0338524	0.0157381	0.0411946	0.0486973	0.0933852	0.0222643	0.0581001	0.0111957	0.0380011	0.0505476	0.0421733	0.0592979	0.048479	0.0210283	0.0419404	0.0403784	0.0825813	Bacteria	Chloroflexi	Anaerolineae	Anaerolineales	Anaerolineaceae	Bellilinea
511	GACGAACGCTGGCGGCGTGCTTAACACATGCAAGTCGAACGATGAACCACTTCGGTGGGGATTAGTGGCGAACGGGTGAGTAACACGTGGGCAATCTGCCCTGCACTCTGGGACAAGCCC-GCGGTGCAGGATGAGCCCGCGGCCTATCAGCTAGTTGGTGAGGTAATGGCTCACCAAGGCGACGACGGGTAGCCGGCCTGAGAGGGCGACCGGCCACACTGGGACTGAGACACGGCCCAG	0.0203542	0	0.141326	0.0156055	0.0192431	0.0707714	0.0241721	0.0175362	0.00888889	0	0.0183217	0	0	0	0.239349	0	0	0.0205973	0.0243487	0.0155642	0.0111321	0.00968335	0	0.0316676	0.042123	0.06326	0	0.0363592	0.0210283	0.0559206	0.0461467	0.0471893	Bacteria	Actinobacteria	Actinobacteria	Actinomycetales	Streptomycetaceae	Streptomyces
512	AACGAACGCTGGCGGCATGCCTAACACATGCAAGTCGAACGAGCTCTTCGGAGCTAGTGGCGCACGGGTGCGTAACGCGTGGGAATCTGCCCTTGGGTTCGGAATAACAGTTAGAAATGA-TCGCCCAGGGATGAGCCCGCGTAGGATTAGCTAGTTGGTGAGGTAAAAGCTCACCAAGGCGACGATCCTTAGCTGGTCTGAGAGGATGATCAGCCACACTGGGACTGAGACACGGCCCAG	0.0101771	0.0337325	0.0235544	0.0156055	0.0192431	0.0202204	0.0402868	0.00876808	0.0177778	0.0184911	0.0549652	0	0.0226296	0.0551369	0.0079783	0.0112841	0.0629525	0.0411946	0.0486973	0.0155642	0.0445286	0.0193667	0.0223914	0.012667	0.0168492	0.0140578	0	0.0121197	0.0105141	0.0139801	0.0115367	0.0117973	Bacteria	Proteobacteria	Alphaproteobacteria	Sphingomonadales	Sphingomonadaceae	Sphingomonas
513	GACGAACGCTGGCGGCGTGCTTAACACATGCAAGTCGAGCGGTAAGGCCTCTTCGGGGGTACACGAGCGGCGAACGGGTGAGTAACACGTGGGTGACCTGCCCTCAGCTCTGGGATAAGC-TCGGCTGGGGATGGGCCCGCGGCCTATCAGCTTGTTGGTGGGGTGATGGCCTACCAAGGCGACGACGGGTAGCCGGCCTGAGAGGGCGTCCGGCCACACTGGGACTGAGACACGGCCCAG	0.0508854	0.0168663	0.0942174	0.132647	0.0705581	0.126378	0.0161147	0.0613766	0	0.0184911	0.0732869	0	0	0	0.0239349	0.0112841	0	0	0	0.0155642	0.0111321	0.0193667	0	0.00633352	0	0.0210867	0.0237192	0.0242395	0.0105141	0.00699007	0.0346101	0.017696	Bacteria	Actinobacteria	Actinobacteria	Actinomycetales	Pseudonocardiaceae	Pseudonocardia
514	GATGAACGCTAGCGACAGGCCTAACACATGCAAGTCGAGGGGTAACAGGGGCTTCGGCCCGCTGACGACCGGCGCACGGGTGAGTAACGCGTATGCAACCTACCTGTAACTGGGGGATAG-TAGGTTACAGATGGGCATGCGTGACATTAGTTAGTTGGCGGGGTAACGGCCCACCAAGACTACGATGTCTAGGGGTTCTGAGAGGAAGGTCCCCCACACTGGTACTGAGACACGGACCAG	0.0712396	0.0505988	0	0.00780275	0.0256575	0.0050551	0	0	0.115556	0.0739645	0.0732869	0.0754907	0.203666	0.128653	0.0079783	0	0.0157381	0	0	0.0155642	0.0111321	0	0	0.0190006	0.0084246	0.0210867	0	0	0.0105141	0.00699007	0.0115367	0	Bacteria	Bacteroidetes	Bacteroidia	Bacteroidales	Marinilabiaceae	Alkaliflexus
515	GATGAACGCTGGCGGCGTGCTTAACACATGCAAGTCGAACGATGAAGCTGGTGCTTGCACTGGTGGATTAGTGGCGAACGGGTGAGTAACACGTGAGCAACCTGCCCCTGACTCTGGGAT-TCGGTTGGGGATGGGCTCGCGGCCTATCAGCTTGTTGGTGAGGTAATGGCTCACCAAGGCGTCGACGGGTAGCCGGCCTGAGAGGGTGACCGGCCACACTGGGACTGAGACACGGCCCAG	0.0610625	0.0843313	0.0235544	0.0780275	0	0.0202204	0.0241721	0.0526085	0.0533333	0.0184911	0.10993	0.0503271	0.0226296	0.018379	0.0159566	0.0225683	0.0157381	0.0205973	0	0.0155642	0.0111321	0	0.0111957	0.00633352	0.0084246	0.0210867	0	0	0	0.00699007	0.0115367	0.017696	Bacteria	Actinobacteria	Actinobacteria	Actinomycetales	Microbacteriaceae	Microbacterium
516	GACGAACGCTGGCGGCGTGCTTAACACATGCAAGTCACGGGGGTCCAGCAATGGGCAACCGGCGAACGGGTGCGTAACACGTGAGCGACCTGCCTCCCTGCGGGGGATAGCCGGCCCAAC-GGGCGGGGAGAGGGGCTCGCGGCCTATCAGCTAGTTGGCGGGGTAACGGCCCACCAAGGCGGTGACGGGTAGCTGGTCTGAGAGGATGGCCAGCCACATTGGGACTGAGAGACGGCCCAG	0	0	0	0	0.00641437	0.0101102	0.00805737	0.00876808	0.00888889	0	0.0549652	0	0.0226296	0.0551369	0.0079783	0.0112841	0.0944287	0.061792	0.0243487	0.0155642	0.0333964	0.0193667	0.0335871	0.0316676	0.0252738	0.0140578	0.0474383	0.0121197	0.0420566	0.0209702	0.0403784	0.017696	Bacteria	Gemmatimonadetes	Gemmatimonadetes	Gemmatimonadales	Gemmatimonadaceae	Gemmatimonas
517	AACGAACGCTGGCGGCGCGCTTAACACATGCAAGTCGAACGAGAAGGCGTAGCAATACGCTTGTAAAGTGGCGAACGGGTGAGGAATACATGGGTAACCTACCCTCGAGTGGGGGATAAC-GCGCTCAAGGATGGGCTCATGTCCTATCAGCTTGTTGGTAGGGTAATGGCCTACCAAGGCATCGACGGGTAGCTGGTCTGAGAGGACGATCAGCCACACTGGCACTGCGACACGGGCCAG	0	0	0.0353315	0.0390137	0.0192431	0.0202204	0.0644589	0.0438404	0.0266667	0.0184911	0.0183217	0	0.0678887	0.0367579	0.0239349	0.0564207	0.0629525	0.0205973	0	0	0.0333964	0.0677835	0.0223914	0.0506682	0.0252738	0.0351444	0.0355787	0.0605987	0.073599	0.0419404	0.0403784	0.0471893	Bacteria	Nitrospira	Nitrospira	Nitrospirales	Nitrospiraceae	Nitrospira
518	GACGAACGCTGGCGGCGTGCTTAACACATGCAAGTGGAGCGACGAACCAGGGCTTGCCCTGGGGCAGAGCCGCGAACGGGTGAGTAACACGTGGGTAACGTGCCCCAATGATCGGGACAA-CCGCATTGGGATCGGCCCGCGGCCCATTAGCTTGTTGGTGAGGTAACGGCTCACCAAGGCTGCGATGGGTAGCTGGTCTGAGAGGACGATCAGCCACACTGGGACTGAGACACGGCCCAG	0	0.0168663	0.0117772	0	0.0128287	0.0101102	0.0161147	0.0175362	0.00888889	0	0.0549652	0.0251636	0.0226296	0	0.0398915	0.0112841	0	0	0.0973947	0.0155642	0	0	0.0335871	0.0316676	0.0084246	0.0351444	0.0237192	0.0242395	0	0.0489305	0.0461467	0.0235946	Bacteria	Actinobacteria	Actinobacteria	Solirubrobacterales	un_Solirubrobacterales	un_Solirubrobacterales
519	AGCGAACGCTGGCGGCAGGCCTAACACATGCAAGTCGAGCGGCCGTAGCAATACGGCAGCGGCAGACGGGAGAGTAACACGTGGGAACGCGCCCTTCGGTTCGGGATAACTCAGGGAAAC-TTGCCGAAGGAACGGCCCGCGTCCGATTAGCTTGTTGGTGAGGTAACGGCTCACCAAGGCGACGATCGGTAGCTGGTCTGAGAGGATGACCAGCCTCACTGGGACTGAGACACGGCCCAG	0.0305312	0	0.0471087	0.0468165	0.0192431	0.0151653	0.0322295	0.0263043	0.0888889	0.0554734	0.0366435	0.125818	0.0678887	0.018379	0.0239349	0.0338524	0.0472144	0.061792	0.0243487	0.0155642	0.0222643	0.0871502	0.0447828	0.0316676	0.0084246	0.0210867	0.0830171	0.0242395	0.0630848	0.0349504	0.0346101	0.0294933	Bacteria	Proteobacteria	Alphaproteobacteria	Rhizobiales	un_Rhizobiales	un_Rhizobiales
520	ATTGAACGCTGGCGGAATGCTTTACACATGCAAGTCGAGCGGCAGCGCGGGGCAACCTGGCGGCGAGCGGCGAACGGGTGAGTAATGCATCGGAACATGTCCATGTCGTGGGGGATAGCC-ACGCGATTGGGTTGGCCGATGTCCGATTAGCTAGTTGGTGGGGTAAAGGCTTACCAAGGCGATGATCGGTAGCTGGTCTGAGAGGATGATCAGCCACACTGGGACTGAGACACGGCCCAG	0.0407083	0	0	0.0234082	0.0256575	0.0151653	0	0.0175362	0.0622222	0	0.0183217	0.0754907	0.0905182	0.0735159	0.0239349	0.0225683	0.0157381	0.061792	0.0243487	0	0.0333964	0.0387334	0.0335871	0.0316676	0.0336984	0.0140578	0.0237192	0	0.0105141	0.0139801	0.0230734	0.017696	Bacteria	Proteobacteria	Betaproteobacteria	un_Betaproteobacteria	un_Betaproteobacteria	un_Betaproteobacteria
521	AACGAACGCTGGCGGCATGCCTAACACATGCAAGTCGAACGGCTCTTCGGAGCAGTGGCGCACGGGTGAGTAACGCGTGGGAACCTACCCTGAGGTTCGGAATAACGGCTGGAAACGGCC-CCGCCTTGGGAGGGGCCCGCGTCCGATTAGCTTGTTGGTGAGGTAACGGCTCACCAAGGCGACGATCGGTAGCTGGTCTGAGAGGATGATCAGCCACACTGGGACTGAGACACGGCCCAG	0.0814166	0.0843313	0.0471087	0.062422	0.0320718	0.0353857	0.128918	0.0789128	0	0.0739645	0	0	0.0226296	0.018379	0.0398915	0.0225683	0	0	0	0.0155642	0.077925	0.0290501	0.0335871	0.0253341	0.042123	0.0210867	0.0355787	0.0363592	0.0420566	0.0419404	0.017305	0.017696	Bacteria	Proteobacteria	Alphaproteobacteria	Rhodospirillales	Rhodospirillaceae	Thalassobaculum
522	ATTGAACGCTGGCGGCAGGCCTAACACATGCAAGTCGAGCGGATGAAGAGAGCTTGCTCTCTGATTCAGCGGCGGACGGGTGAGTAATGCCTAGGAATCTGCCTGGTAGTGGGGGACAAC-GCGCTATCAGATGAGCCTAGGTCGGATTAGCTAGTTGGTGAGGTAATGGCTCACCAAGGCGACGATCCGTAACTGGTCTGAGAGGATGATCAGTCACACTGGAACTGAGACACGGTCCAG	0.0610625	0.0168663	0.0471087	0.0780275	0.0577293	0.0808816	0.0161147	0	0.0177778	0	0.0183217	0	0	0	0.0079783	0	0	0	0	0.0155642	0.0445286	0.00968335	0	0	0	0.0140578	0.0118596	0.0121197	0.0105141	0.0139801	0.00576834	0.017696	Bacteria	Proteobacteria	Gammaproteobacteria	Pseudomonadales	Pseudomonadaceae	Pseudomonas
523	AATCAACGCTGGCGGCGTGCCTAACACATGCAAGTCGAGCGAGAAAAGGGGAGCAATCCTCTGAGTAAAGCGGCGCACGGGTGAGTAACACGTGGGTAATCTGCCCTGAAGTGGGGAATA-TCGCTTCAGGAGGAGCCCGCGGCTGATTAGCTAGTTGGTGAGGTAATGGCCCACCAAGGCTACGATCAGTATCCGGTCTGAGAGGACGGTCGGACACACTGGAACTGAGACACGGTCCAG	0.0610625	0.0505988	0.0117772	0.031211	0.00641437	0	0.0241721	0.0175362	0.0444444	0.0184911	0.0549652	0.0251636	0.0226296	0.0367579	0.0239349	0.0451365	0.110167	0	0	0	0.0111321	0.00968335	0	0.00633352	0.0168492	0.0210867	0.0355787	0.0242395	0.0210283	0.00699007	0.017305	0.0117973	Bacteria	Acidobacteria	Acidobacteria_Gp5	Acidobacteria_Gp5	Acidobacteria_Gp5	Gp5
524	GACGAACGCTGGCGGCGTGCTTAACACATGCAAGTCGAACGGAAAGGCCCCTTCGGGGGTACTCGAGTGGCGAACGGGTGAGTAACACGTGGGTGATCTGCCCTGCACTTTGGGATAAGC-GCGGTGTGGGATGGGCCCGCGGCCTATCAGCTTGTTGGTGAGGTTACGGCTCACCAAGGCGACGACGGGTAGCCGGCCTGAGAGGGTGTCCGGCCACACTGGGACTGAGATACGGCCCAG	0	0	0	0.0234082	0	0.0657163	0	0.0350723	0	0	0	0	0	0	0	0	0	0	0.0243487	0.0155642	0	0	0	0.0253341	0.042123	0.0984044	0	0	0	0.0279603	0.0288417	0.035392	Bacteria	Actinobacteria	Actinobacteria	Actinomycetales	Mycobacteriaceae	Mycobacterium
525	GACGAACGCTGGCGGCGTGCCTAATACATGCAAGTCGAACGCGAAAGGCTTGAAGCCTTCGGGCGGAGGGCCGAGTAGAGTGGCGAACGGGTGAGGAACACGTAGGTGACCTGCCCCGGA-GCGCTCCGGGAGGGGCCTGCGGCCCATCAGCTAGTTGGTAGGGTAAAGGCCTACCAAGGCGAAGACGGGTAGGGGGCCTGAGAGGGTGGTCCCCCACATGGGAACTGAGACACGGTCCCA	0.132302	0.26986	0.200212	0.148252	0.128287	0.0758265	0.0644589	0.0964489	0.488889	0.628698	0.677904	0.603926	0.701516	0.588127	0.295197	0.383661	0.440667	0.267765	0.316533	0.29572	0.222643	0.445434	0.291088	0.32301	0.320135	0.414704	0.260911	0.351473	0.136684	0.328533	0.346101	0.294933	Bacteria	Chloroflexi	un_Chloroflexi	un_Chloroflexi	un_Chloroflexi	un_Chloroflexi
526	AGCGAACGTTAGCGGCGCGCCTAACACATGCAAGTCGCACGAGAAGGGGGCAACCCTGGACAGTGGCGCACGGGTGCGTAACACGTAGATAACCTGCCCTTCGAAGGGGGATAACGTTCC-TCGTCGGAGGAGGGGTCTGCGGCCCATCAGCTAGTTGGTGAGGTAATGGCTCACCAAGGCAAAGACGGGTAGCTGGTCTGAGAGGATGATCAGCCACACTGGTACTGGAACACGGACCAG	0.0101771	0	0.0353315	0.0156055	0.0384862	0.106157	0.0483442	0.0438404	0	0	0	0	0	0	0	0	0.0157381	0.0205973	0	0	0.0222643	0	0	0.0380011	0.0084246	0.00702889	0.0237192	0.0121197	0	0	0.0115367	0.017696	Bacteria	Proteobacteria	Deltaproteobacteria	Myxococcales	Polyangiaceae	un_Polyangiaceae
527	AACGAACGCTGGCGGCGTGGATAAGACATGCAAGTCGAGCGGGGTGCTATTAGTAGCAATACTGGTAGTACTCAGCGGCGCAAGGGTGCGTAACACGTGGGCAACCTGCCCGGAAATGGG-ACGTTTCTGGATGGGCCCGCGGCCTATCAGCTAGTTGGAGAGGTAACGGCTCCCCAAGGCTATGACGGGTAGCTGGTCTGAGAGGACGACCAGCCACACTGGAACTGAGACACGGTCCAG	0.0508854	0.0168663	0	0.0390137	0.0128287	0.0202204	0.0402868	0.0613766	0.0533333	0.0184911	0.0732869	0.0251636	0	0.018379	0.0398915	0.0564207	0.0157381	0.144181	0.0486973	0.077821	0.0556607	0.0387334	0.0335871	0.0380011	0.0589722	0.0351444	0.0118596	0	0.0315424	0.0209702	0.0288417	0.0471893	Bacteria	Verrucomicrobia	Spartobacteria	Spartobacteria	Spartobacteria	Spartobacteria_g.i.s.
528	GAACAACGCTGGCGGCGTGCCTAATGCATGCAAGTCGGACGGGAACCCCTTCGGGGGTCGACCGTGGCGGACGGGTGAGGAACACGTGGGCAACCTGCCCGCGCGCGGGGGATAACCGCG-CTGCGCGCGGAGGGGCCTGCGGCCTATCAGCTAGACGGTGGGGTAACGGCCTACCGTGGCGATGACGGGTAGCTGGTCTGAGAGGACGATCAGCCACACGGGGACTGAGACACGGCCCCG	0.0101771	0.0168663	0	0	0	0.0101102	0	0	0.0622222	0.0369822	0.0549652	0.0503271	0.0226296	0.0367579	0.0558481	0.0677048	0.0157381	0.0411946	0.0243487	0.0155642	0.0445286	0.0193667	0	0	0.0252738	0.00702889	0	0.0242395	0	0.0209702	0.00576834	0.035392	Bacteria	Chloroflexi	Thermomicrobia	Sphaerobacterales	Sphaerobacteraceae	Sphaerobacter
529	GACGAACGCTGGCGGCGTGCCTAATGCATGCAAGTCGAACGCTGCTCCTTCGGGAGCGGCGTGGCGCACGGCTGAGGAACACGTGGCTACCTGCCCCGCGGTGGGGGATAACGGCGCGAA-GCGCCGTGGGAGGGGGCTGCGGCCCATCAGGTGGTTGGCGGGGTAACGGCCCACCAAGCCGATGACGGGTTGCTGGTCTGTGAGGACAACCAGCCAGACTGGGACTGAGAGACGGCCCAG	0.0203542	0.0168663	0	0	0.00641437	0	0.0161147	0.0175362	0.0177778	0.0739645	0.0183217	0	0	0.018379	0.0558481	0.0225683	0.0786906	0.0205973	0.0243487	0.0311284	0.0333964	0.0677835	0.0223914	0.0190006	0.0336984	0.0210867	0.0711575	0.0242395	0.0210283	0.0349504	0.0519151	0.0412906	Bacteria	Chloroflexi	Chloroflexi	Chloroflexales	Chloroflexaceae	Roseiflexus
530	ATTGAACGCTAGCGGAATGCTTTACACATGCAAGTCGAACGGCAGCGCGGGTCTTCGGACCTGGCGGCGAGTGGCGAACGGGTGAGTAATGCATCGGAACGTACCCAGTAGTGGGGGATA-GCGCTATTGGAGCGGCCGATGTCGGATTAGCTAGTTGGTGGGGTAAAGGCCTACCAAGGCGACGATCCGTAGCTGGTTTGAGAGGACGACCAGCCACACTGGGACTGAGACACGGCCCAG	0.0814166	0.0843313	0.0117772	0.00780275	0.0192431	0.0404408	0.00805737	0.0175362	0.0444444	0.0739645	0.0549652	0	0	0.0551369	0	0.0225683	0.0157381	0	0	0.0155642	0	0.0484168	0.0223914	0.00633352	0.0168492	0.0210867	0.0118596	0	0.0105141	0.0209702	0.017305	0.0235946	Bacteria	Proteobacteria	Betaproteobacteria	Burkholderiales	Alcaligenaceae	un_Alcaligenaceae
531	AACGAACGCTGGCGGCGTGGATTAGGCATGCAAGTCGTACGCGAAAGTTCCCTTCGGGGGGCGAGTAGAGTGGCGAACTGGTGAGTACAAGGTGACTAACCTGCCCTTGAGTGGGGGATA-GCGCTCGAGGATGGGGTCACCCCCCATTAGCTTGTTGGTAGGGTAACGGCCTACCAAGGCTGCGATGGGTAGCTGGACTGAGAGGTTGGCCAGCCACACTGGGACTGAGATACGGCCCAG	0	0	0	0.031211	0.0128287	0.0050551	0.0241721	0.0175362	0.0177778	0	0	0	0	0	0.0558481	0.0338524	0	0.0411946	0.073046	0.0466926	0.0222643	0.0387334	0.0223914	0.0570017	0.0589722	0.0492022	0	0.0363592	0	0.0209702	0.0230734	0.035392	Bacteria	BRC1	BRC1	BRC1	BRC1	BRC1_g.i.s.
532	GATGAACGCTAGCGGCAGGCTTAATACATGCAAGTCGAGGGGCAGCATGGTTGTAGCAATACAACTGATGGCGACCGGCAAACGGGTGCGGAACACGTACGCAACCTACCCAAAACTGGG-CGGTTTTGGATGGGCGTGCGCCTGATTAGGTAGTTGGTGAGGGTAACGGCCCACCAAGCCTGCGATCAGTAACTGGTGTGAGAGCACGACCAGTCACACGGGCACTGAGACACGGGCCCG	0	0	0.0235544	0.00780275	0.0384862	0.0252755	0.0241721	0.0175362	0.00888889	0	0	0	0	0.018379	0.0159566	0.0225683	0.0157381	0	0	0.0622568	0.0445286	0.00968335	0.0335871	0.0253341	0.0084246	0.0210867	0.0237192	0.0242395	0.0525707	0	0.0115367	0.0117973	Bacteria	Bacteroidetes	Sphingobacteria	Sphingobacteriales	Chitinophagaceae	Flavisolibacter
533	GACGAACGCTGGCGGCGTGCCTAACACATGCAAGTCGAACGGGACCGGGGGCAACTCCGGTTCAGTGGCGGACGGGTGCGTAACACGTGAGGAACATGACTTTCGGTGGGGGATAGCCGG-GCGCCGAAAGAGTGCCTCGCGGCCTATCAGCTAGTTGGTGGGGTAATGGCCCACCAAGGCGACGACGGGTAGCTGGTCTGAGAGGATGGCCAGCCACATTGGGACTGAGACACGGCCCAG	0.0101771	0	0.0235544	0.0156055	0.00641437	0.0151653	0.0241721	0.0263043	0.00888889	0.0184911	0.0732869	0	0	0.018379	0.0558481	0.0112841	0	0	0	0	0.0111321	0.0193667	0.0111957	0.0316676	0.0084246	0.0702889	0.0237192	0.0605987	0.0105141	0.00699007	0.0346101	0.0471893	Bacteria	Gemmatimonadetes	Gemmatimonadetes	Gemmatimonadales	Gemmatimonadaceae	Gemmatimonas
534	GATAAACGCTGGCGGCGTGCCTAATGCATGCAAGTCGAACGGGAGCCCCTTCGGGGGTCGACCGTGGCGGACGGGTGAGGAACACGTAGCTAACCTGCCCAGGCGTGGGGGATATCCACC-TCGCGCTTGGAGGGGGCTGCGTCCGATTAGCTGGTTGGTGGGGTAACGGCCTACCAAGGCGATGATCGGTCGCTGGTCTGAGAGGACGACCAGCCACACGGGGACTGAGACACGGCCCCG	0.0101771	0.0337325	0.0117772	0	0	0	0	0.00876808	0.0266667	0	0.0183217	0.0251636	0	0.018379	0.0398915	0.0451365	0.0629525	0	0.0243487	0	0.0222643	0.0290501	0.0111957	0.0316676	0.0168492	0.0492022	0.0474383	0.0242395	0.0210283	0.0279603	0.017305	0.0117973	Bacteria	Chloroflexi	Thermomicrobia	Sphaerobacterales	Sphaerobacteraceae	Sphaerobacter
535	GACGAACGCTGGCGGCGTGCTTAACACATGCAAGTCACGGGGGCTCCGCAAGGAGCAACCGGCGAACGGGTGCGTAACACGTGAACAACCTGCCCTCGTGTGGGGGATAGCCGGGCTAAC-GCGCACGGGGAGGGGTTCGCGGCCTATCAGCTTGTTGGCGGGGTAATGGCCCACCAAGGCGACGACGGGTAGCTGGTCTGAGAGGATGGCCAGCCACATTGGGACTGAGAGACGGCCCAG	0.0101771	0	0	0	0	0	0	0	0.0444444	0	0	0.0251636	0.0226296	0.018379	0.0239349	0.0225683	0	0.0205973	0.0973947	0.0311284	0.0556607	0.0484168	0.0671742	0.0443347	0.0673968	0.0210867	0.0118596	0.0121197	0	0.0139801	0.0461467	0.017696	Bacteria	Gemmatimonadetes	Gemmatimonadetes	Gemmatimonadales	Gemmatimonadaceae	Gemmatimonas
536	GATGAACGCTGGCGGCGTGCCTAATACATGCAAGTCGGACGCGGGACTTCATTTCGGTGGAGTTCTGAGTGGCGGACGGGTGAGTAACACGTGGCTGACCTGCCCTTCAGAGGGGGACAA-GTGCTGAAGGAGGGGGCTGCGGCCCATCAGCTAGTTGGTAGGGTAAGGGCCTACCAAGGCGAGGACGGGTAGGGGGCCTGAGAGGGTGACCCCCCACACTGGGACTGAGACACGGCCCAG	0.0305312	0.0337325	0	0.031211	0	0.0202204	0.0241721	0.0263043	0.0444444	0	0.0549652	0.100654	0.0678887	0.018379	0.0159566	0.0225683	0	0	0.0243487	0	0	0.0290501	0	0.0190006	0.0336984	0.0210867	0.0118596	0.0121197	0	0.0139801	0.0288417	0.017696	Bacteria	Chloroflexi	Anaerolineae	Anaerolineales	Anaerolineaceae	un_Anaerolineaceae
537	GACGAACGCTGGCGGCGCGCTTAACACATGCAAGTCGAGCGAGAACCAGACCTTCGGGTCTGGGGACAGCGGCGAACGGGTGAGTAACACGTGGGTAATCAACCCTTGACACTGGGATAG-CCGGTCAAGGACGAGCCCGCGGCGGATTAGCTTGTTGGTGAGGTAACGGCTCACCAAGGCGACGATCCGTAGCTGGTCTGAGAGGACGATCAGCCACACTGGGACTGAGACACGGCCCAG	0	0.0168663	0.0117772	0	0.00641437	0.0050551	0.00805737	0	0.0177778	0.0184911	0.0916086	0	0	0.0367579	0.0398915	0.0564207	0.0472144	0.0411946	0.0243487	0	0.0222643	0.0193667	0.0671742	0.0253341	0	0.0562311	0.0355787	0.0121197	0.0210283	0.0279603	0.0519151	0.0589866	Bacteria	un_Bacteria	un_Bacteria	un_Bacteria	un_Bacteria	un_Bacteria
538	GACGAACGCTGGCGGCGTGCTTAACACATGCAAGTGGAGCGACGAACCAGGGCTTGCCCTGGGGCAGAGCCGCGAACGGGTGAGTAACACGTGGGTAACCTACCTCGATGACCGGGACAA-TCGCATCGAGACGGGCCCGCGGCCCATTAGCTTGTTGGTGAGGTAACGGCTCACCAAGGCTGCGATGGGTAGCTGGTCTGAGAGGACGATCAGCCACACTGGGACTGAGACACGGCCCAG	0.0305312	0.067465	0.0824402	0.00780275	0.0256575	0.0454959	0.0322295	0.105217	0.0266667	0	0.0549652	0	0	0.018379	0	0	0	0	0	0.0311284	0.0222643	0.00968335	0.0111957	0	0	0.00702889	0	0.0121197	0	0.0139801	0.0230734	0.0117973	Bacteria	Actinobacteria	Actinobacteria	Solirubrobacterales	Solirubrobacteraceae	Solirubrobacter
539	GACGAACGCTGGCGGCGTGCTTAACACATGCAAGTCGTGCGGAAAGGCCCCTTCGGGGGTACTCGAGCGGCGAACGGGTGAGTAACACGTGAGTGACCTGCCCTTCACTCTGGGATAACC-CTGGTGAGGGATGGGCTCGCGGCCTATCAGCTTGTTGGTGGGGTAATGGCCTACCAAGGCGATGACGGGTAGCCGGCCTGAGAGGGCGACCGGCCACACTGGGACTGAGACACGGCCCAG	0.0203542	0	0.0235544	0.0156055	0	0	0.0161147	0.0263043	0.0177778	0.0184911	0.0183217	0	0	0.0551369	0.0558481	0.0225683	0	0	0	0.0155642	0	0.0193667	0.0111957	0.0190006	0	0.0492022	0	0.0605987	0	0.0139801	0.0288417	0.0412906	Bacteria	Actinobacteria	Actinobacteria	Actinomycetales	Micromonosporaceae	un_Micromonosporaceae
540	GATGAACGCTGGCGGCGTGCTTAACACATGCAAGTCGAACGATGATGCCAGCTTGCTGGTGGATTAGTGGCGAACGGGTGAGTAACACGTGAGTAACCTGCCCTTGACTCTGGGATAAGC-GTGGTTTTGGATGGACTCGCGGCCTATCAGCTTGTTGGTGGGGTAATGGCCTACCAAGGCGACGACGGGTAGCCGGCCTGAGAGGGTGACCGGCCACACTGGGACTGAGACACGGCCCAG	0.0407083	0.0168663	0.0235544	0.031211	0.0256575	0.0758265	0.00805737	0.0526085	0.0177778	0.0369822	0.0366435	0.0251636	0.0226296	0	0	0.0112841	0.0314762	0.0205973	0.0243487	0.0311284	0	0.00968335	0.0111957	0.0190006	0.042123	0.0492022	0	0.0363592	0.0105141	0.0349504	0.0346101	0.0412906	Bacteria	Actinobacteria	Actinobacteria	Actinomycetales	Micrococcaceae	Arthrobacter
541	GATGAACGCTAGCGGCAGGCATAATACATGCAAGTTGAACGGGATTAGTTGGGTTTACTCGACTATGAGAGTGGCGCACGGGTGCGTAACACGTATGCAACCTGCCTTGAACTGGGGGAT-GCGGTTCAAGATGGGCATGCGCGTCATTAGCTAGATGGAGAGGTAACGGCTCACCATGGCAACGATGACTAGGGGGTCTGAGAGGATGTCCCCCCACACTGGTACTGAGACACGGACCAG	0.0101771	0	0.0235544	0	0.00641437	0.0101102	0.0644589	0.0175362	0.00888889	0	0	0.0251636	0	0	0.0478698	0.0112841	0.0157381	0	0	0.0155642	0.0111321	0.00968335	0.0223914	0.0380011	0.0084246	0.0281156	0	0.048479	0.0210283	0.0489305	0.0230734	0.0294933	Bacteria	Bacteroidetes	un_Bacteroidetes	un_Bacteroidetes	un_Bacteroidetes	un_Bacteroidetes
542	GACGAACGCTGGCGGCGTGCCTAATACATGCAAGTCGAACGAGTGACCCCTTGGTGGCAACACCTTGGGCGATCTAGTGGCGAACGGGTGAGTAACACGTGAGGAACCTGCCCCGAAGAC-CCGCTTCGGGAGGGCCTCGCGGCCTATCAGCTTGTTGGTGGGGTAACGGCCCACCAAGGCAGCGACGGGTAGCTGGTCTGAGAGGACGATCAGCCACACTGGGACTGAGACACGGCCCAG	0.0712396	0.0505988	0	0.0468165	0.0449006	0.0404408	0.0322295	0.0175362	0.0444444	0.0369822	0.0366435	0.0503271	0.0226296	0.0551369	0.0239349	0.0112841	0.0157381	0	0.0243487	0.0311284	0.0111321	0.0290501	0	0.0316676	0.0168492	0.0492022	0	0.0121197	0	0.0279603	0.017305	0.035392	Bacteria	Actinobacteria	Actinobacteria	Acidimicrobiales	un_Acidimicrobiales	un_Acidimicrobiales
543	GATGAACGCTAGCGGCAGGCCTAACACATGCAAGTCGAACGGGATCCATCAGCTTGCTGATGGTGAGAGTGGCGCACGGGTGAGTAACGCGTATGCAACCTACCTTTTACTGTGGGATAG-TGGGTAAGAGATGGGCATGCGTTCTATTAGTTAGTTGGAGTGGTAACGGCACCCCAAGACAGCGATAGATAGGGGCCCTGAGAGGGGGACCCCCCACACTGGTACTGAGACACGGACCAG	0.0508854	0.067465	0.0117772	0.0858302	0.0577293	0.0252755	0.0161147	0.00876808	0.0266667	0.0184911	0.0183217	0	0.0226296	0.0551369	0.0319132	0.0112841	0	0.0411946	0.073046	0.0311284	0.0222643	0	0.0223914	0.0506682	0.0505476	0.0210867	0	0.0242395	0.0210283	0.0349504	0.017305	0.035392	Bacteria	Bacteroidetes	Flavobacteria	Flavobacteriales	Flavobacteriaceae	Gelidibacter
544	GATAAACGCTGGCGGCGTGCCTAATGCATGCAAGTCGAACGTCCCCTCGGGGACGTGGCAAACGGGTGAGTAACGCGTAGGTGACCTGCCGTCGAGTGGGGCATAACCCGGGGAAACTCG-GCGCTCGGCGAGGGGCCTGCGTCCGATTAGCTGGTTGGTGGGGTAACGGCCTACCAAGGCGATGATCGGTAGCCGGTCTGAGAGGACGGCCGGCCACACTGGAACTGCGACACGGTCCAG	0.0407083	0.067465	0.0117772	0.031211	0.0192431	0	0.00805737	0.0175362	0.0355556	0.0924556	0	0	0.0678887	0.0367579	0.0159566	0.0112841	0.0157381	0.0411946	0	0	0.0111321	0.0193667	0	0.0190006	0.0252738	0.00702889	0.0118596	0	0.0105141	0.0209702	0.017305	0.0235946	Bacteria	Chloroflexi	un_Chloroflexi	un_Chloroflexi	un_Chloroflexi	un_Chloroflexi
545	ATTGAACGCTAGCGGGATGCTTTACACATGCAAGTCGAACGGCAGCGCGAAGAGAGCTTGCTCTTTTTGGCGGCGAGTGGCGAACGGGTGAGTAATATATCGGAACGTGCCCAGTAGCGG-TCACTATTGGAGCGGCCGATATCAGATTAGCTTGTTGGTGAGGTAAAGGCTCACCAAGGCCGCGATCTGTAGCTGGTTTGAGAGGACGACCAGCCACACTGGGACTGAGACACGGCCCAG	0.101771	0.067465	0.0235544	0.0234082	0.0192431	0.050551	0.00805737	0.0175362	0.00888889	0	0.0366435	0	0.0452591	0	0.0319132	0.0225683	0.0157381	0	0	0.0155642	0.0222643	0.00968335	0.0223914	0.0380011	0.0084246	0.0210867	0.0118596	0.0242395	0	0	0.0230734	0.017696	Bacteria	Proteobacteria	Betaproteobacteria	Burkholderiales	Alcaligenaceae	Pusillimonas
546	GATAAACGCTGGCGGCGTGCTTCAGGCATGCAAGTCGAACGGACCTTCGGGTCAGTGGCGGACGGGTGAGTAACACGTAAGCAACCTGCCCAGAAGTGGGGAATAACTTGCCGAAAGGTG-CCGCTTCTGGAGGGGCTTGCGGTCGATTAGCTAGTTGGTGGGGTAATGGCCTACCAAGGCAACGATCGATAGCTGGTCTGAGAGGACGGTCAGCCACACGGGGACTGAGATACGGCCCCG	0.0101771	0	0	0	0.0320718	0.0101102	0.0805737	0.0876808	0	0	0	0	0	0	0	0	0	0.0205973	0	0	0	0	0	0.00633352	0.0168492	0	0.0474383	0.0242395	0.0630848	0.0279603	0.0230734	0.0471893	Bacteria	Chloroflexi	un_Chloroflexi	un_Chloroflexi	un_Chloroflexi	un_Chloroflexi
547	ATTGAACGCTGGCGGCATGCCTTACACATGCAAGTCGAGCGGCAGCGCGGGGGCAACCCTGGCGGCGAGCGGCGCACGGGTGAGTAATGCATCGGAACGTGTCCTCTTGTGGGGGATAAC-GCGCGAGAGGAGCGGCCGATGCCGGATTAGCTAGTTGGTGGGGTAAAAGCCTACCAAGGCGACGATCCGTAGCTGGTTTGAGAGAACGACCAGCCACACTGGGACTGAGACACGGCCCAG	0	0	0.0117772	0.0156055	0.00641437	0.0303306	0.0402868	0.0263043	0.00888889	0	0.0366435	0	0	0	0.0079783	0.0112841	0	0.0205973	0	0.0311284	0.0111321	0.0387334	0.0111957	0.00633352	0.0336984	0.0210867	0.0474383	0.0242395	0.115656	0.0279603	0.0461467	0.0412906	Bacteria	Proteobacteria	Betaproteobacteria	un_Betaproteobacteria	un_Betaproteobacteria	un_Betaproteobacteria
548	AACGAACGTTGGCGGCGTGGATGAGGCATGCAAGTCGAACGTGAAAGCTACTTCGGTAGTGAGTAAAGTGGCGAACGGGTGAGTAACACGTAACCAAGCTACCCTCGAGATCGGGATAAC-TTGCTCGAGGAGGCGGTTGCGGCCTATCAGCTAGTTGGTGGTGTAATAGACCACCAAGGCGACGACGGGTAGCGGGCCTGAGAGGGTGGCCCGTCACACTGGGACTGAGACACTGCCCAG	0	0	0.0117772	0	0.0256575	0.0050551	0.161147	0.0526085	0	0	0	0	0	0	0	0	0	0	0	0	0	0	0	0	0	0.00702889	0.0592979	0.0242395	0.0210283	0.00699007	0.0230734	0.035392	Bacteria	Planctomycetes	un_Planctomycetes	un_Planctomycetes	un_Planctomycetes	un_Planctomycetes
549	AACGAACGCTGGCGGCGCGCCTAATACATGCAAGTCGAGCGAGAAGGTGTAGCAATACACTTGTAAAGCGGCGAACGGGTGAGGAATACATGGGTGACCTACCATCGAGTGGGGAATAAC-GCGCTCTTTGATGGGCTCATGTCCTATCAGCTTGTTGGTAGGGTAACGGCCTACCAAGGCTTTGACGGGTAGCTGGTCTGAGAGGACGATCAGCCACACTGGCACTGCGACACGGGCCAG	0.0203542	0	0.0942174	0.0390137	0.0256575	0.0101102	0.0402868	0.0789128	0.0177778	0.0184911	0.0366435	0	0	0.0367579	0.0398915	0.0451365	0.0314762	0.061792	0	0.0311284	0.0445286	0.0581001	0.0671742	0.0570017	0.0505476	0.105433	0.0592979	0.048479	0.0420566	0.0699007	0.0865251	0.0825813	Bacteria	Nitrospira	Nitrospira	Nitrospirales	Nitrospiraceae	Nitrospira
550	AACGAACGCTGGCGGCATGCCTAACACATGCAAGTCGAACGAGACCTTCGGGTCTAGTGGCGCACGGGTGCGTAACGCGTGGGAACCTGCCCTTAGGTTCGGAATAACAGTGAGAAATCG-TCGCCTTTGGATGGGCCCGCGTTGGATTAGCTAGTTGGTGGGGTAAAGGCTCACCAAGGCGACGATCCATAGCTGGTCTGAGAGGATGATCAGCCACACTGGGACTGAGACACGGCCCAG	0.0101771	0.0168663	0	0.0156055	0.0192431	0.0101102	0.00805737	0.00876808	0.00888889	0.0184911	0	0.0251636	0	0.018379	0.0478698	0.0112841	0	0	0	0.0622568	0.0445286	0.0387334	0	0.012667	0.0168492	0.0210867	0.0118596	0.0363592	0.0105141	0.0139801	0.0115367	0.035392	Bacteria	Proteobacteria	Alphaproteobacteria	Sphingomonadales	Erythrobacteraceae	Altererythrobacter
551	GATGAACGCTAGCGGCAGGCCTAACACATGCAAGTCGAGGGGCAGCGCGGTGTAGCAATACACTGGCGGCGACCGGCGCACGGGTGAGTAACACGTATGGAACCTGCCCTTTACTGGGGA-GCGGTAAAGGATGGCCATGCGTCCCATTAGCTAGTTGGTGAGGTAACGGCTCACCAAGGCGATGATGGGTAGGGGGCCTGAGAGGGTTATCCCCCACACTGGAACTGAGACACGGACCAG	0.0305312	0	0	0.0156055	0.0128287	0	0	0	0.0266667	0.129438	0.0549652	0.0754907	0.0678887	0.128653	0.0159566	0.0225683	0.0786906	0.0411946	0	0	0.0111321	0.00968335	0.0223914	0.0253341	0.0168492	0.0140578	0.0237192	0.0242395	0.0105141	0.00699007	0.0115367	0.017696	Bacteria	Bacteroidetes	Flavobacteria	Flavobacteriales	un_Flavobacteriales	un_Flavobacteriales
552	AACGAACGCTGGCGGCAGGCTTAACACATGCAAGTCGAACGAACGTAGCAATACGTTAGTGGCGCACGGGTGAGTAACGCGTGGATATCTGCCTTTTGGTTCGGGATAACCTTGGGAAAC-TCGCCAAAAGATGAGTCCGCGTCCGATTAGCTAGTTGGTGGGGTAATGGCCCACCAAGGCGACGATCGGTAGCTGGTCTGAGAGGACGATCAGCCACACTGGGACTGAGACACGGCCCAG	0.0101771	0.0337325	0.0235544	0.0156055	0.0320718	0.0454959	0.0322295	0.0526085	0.0266667	0	0.0183217	0	0.0226296	0.018379	0.0319132	0	0.0157381	0.0411946	0.0243487	0.0311284	0.0111321	0.00968335	0	0	0	0	0.0355787	0	0.0420566	0.0349504	0.00576834	0.017696	Bacteria	Proteobacteria	Alphaproteobacteria	Rhodospirillales	un_Rhodospirillales	un_Rhodospirillales
553	GATGAACGCTAGCGGCAGGCTTAATACATGCAAGTCGAGGGGCAGCAGGGTGTAGCAATACATCGCTGGCGACCGGCAAACGGGTGAGGAACACGTGCGCAACCTCCCTTCAAGTGAGGA-ACGCTTGAAGATGGGCGTGCGTCTGATTAGGTAGTTGGCGGAGTAACAGCCCACCAAGCCTGCGATCAGTAACTGGTGTGAGAGCACGACCAGTCACACGGGCACTGAGACACGGGCCCG	0.0407083	0.0168663	0.0471087	0.0156055	0.0192431	0.0252755	0.0241721	0.0175362	0.0266667	0.0739645	0.0549652	0.150981	0.0226296	0.0367579	0.0319132	0.0338524	0.0314762	0	0.073046	0.0466926	0	0.0290501	0.0223914	0.0316676	0.042123	0.0351444	0.0118596	0	0.0315424	0.0209702	0.0230734	0.0412906	Bacteria	Bacteroidetes	Sphingobacteria	Sphingobacteriales	Chitinophagaceae	Flavitalea
554	GACGAACGCTGGCGGCGTGCTTAAAACATGCAAGTCGAACGAGAGCTTCGGCTCTAGTGGCAAACGGCTGAGTAACGCGTGGGTGACCTACCTGGAAGTGGGGAATAACTGCCCGAAAGG-ACGCTTCGAGAGGGGCCCGCGTTCGATTAGCTAGTTGGTGGGGTAACGGCTTACCAAGGCGACGATCGATAGCTGGTCTAAGAGGATGATCAGCCAGACTGGGACTGCGACACGGCCCAG	0.0203542	0.118064	0.0588859	0.0546192	0.0320718	0.0252755	0.0402868	0.0613766	0.0533333	0.0554734	0.0366435	0.0251636	0.0226296	0.0551369	0.0239349	0.0112841	0.0314762	0.061792	0.0243487	0.0311284	0.0222643	0.0484168	0.0111957	0.0316676	0.0084246	0.00702889	0.0355787	0	0.0105141	0.0209702	0.0230734	0.0412906	Bacteria	un_Bacteria	un_Bacteria	un_Bacteria	un_Bacteria	un_Bacteria
555	ATTGAACGCTGGCGGCATGCCTTACACATGCAAGTCGAACGGCAGCACGGGAGCAATCCTGGTGGCGAGTGGCGAACGGGTGAGTAATACATCGGAACGTGCCCAGTAGTGGGGGATAGC-GCGCTATTGGAGCGGCCGATGTCAGATTAGCTAGTTGGTGGGGTAAAAGCCTACCAAGGCGACGATCTGTAGCTGGTCTGAGAGGACGACCAGCCACACTGGGACTGAGACACGGCCCAG	0.0407083	0.0843313	0.141326	0.109238	0.0513149	0.0454959	0.0241721	0.0263043	0.00888889	0.0739645	0.0183217	0	0.0226296	0	0.0079783	0.0225683	0	0.0205973	0.0243487	0.0311284	0.0333964	0.0290501	0.0335871	0.0506682	0.0336984	0.0210867	0.0118596	0.0121197	0.0315424	0	0.017305	0.035392	Bacteria	Proteobacteria	un_Proteobacteria	un_Proteobacteria	un_Proteobacteria	un_Proteobacteria
556	AATCAACGCTGGCGGCGTGCCTAACACATGCAAGTCGAACGCGAAAGGGGCTTCGGCCCTGAGTAGAGTGGCGAACGGGTGAGTAACACGTGGGTGACCTGCCTTCGAGTGGGGGATAAC-GCGCTTGAAGAGGGGCCCGCGCCCGATTAGCTAGTTGGTGGGGTAATGGCCTACCAAGGCTTCGATCGGTAGCCGGCCTGAGAGGGCGGACGGCCACACTGGGACTGAGACACGGCCCAG	0.0101771	0	0.0353315	0.031211	0.0320718	0.0606612	0.0241721	0.0350723	0.00888889	0	0.0183217	0	0	0.018379	0	0.0112841	0.0157381	0	0	0	0.0111321	0.00968335	0	0.00633352	0.0084246	0.0210867	0.0118596	0.0121197	0	0.0209702	0.0115367	0.017696	Bacteria	Acidobacteria	Acidobacteria_Gp6	Acidobacteria_Gp6	Acidobacteria_Gp6	Gp6
557	ATTGAACGCTGGCGGCATGCCTTACACATGCAAGTCGAGCGGCAGCGCGGGGGCAACCCTGGCGGCGAGCGGCGCACGGGTGAGTAATGCATCGGAACGTGTCCTCTTGTGGGGGATAAC-GCGCGAGAGGAGCGGCCGATGCCGGATTAGCTAGTTGGTGGGGTAATGGCCCACCAAGGCGACGATCCGTAGCTGGTTTGAGAGAACGACCAGCCACACTGGGACTGAGACACGGCCCAG	0.0203542	0	0.0235544	0	0.0128287	0.0303306	0.0322295	0.0350723	0.0177778	0.0184911	0.10993	0.0251636	0.0678887	0.0551369	0.0159566	0	0.0157381	0	0	0	0.0333964	0	0.0447828	0.0190006	0.0252738	0.0210867	0.0237192	0.0242395	0.0210283	0.00699007	0.0403784	0.0235946	Bacteria	Proteobacteria	Betaproteobacteria	Burkholderiales	un_Burkholderiales	un_Burkholderiales
558	GACGAACGCTGGCGGCGTGCCTAACACATGCAAGTCGAACGGGACCGGGGGCAACTTCGGTTCAGTGGCGGACGGGTGCGTAACACGTGAGGAACATGACCTTCGGCGGGGGATAGCCGG-GCGCCGATGGAGTGCCTCGCGGCCTATCAGCTAGTTGGTGGGGTAACGGCCTACCAAGGCAACGACGGGTAGCTGGTCTGAGAGGATGGCCAGCCACATTGGGACTGAGACACGGCCCAG	0.0101771	0.0168663	0.0117772	0.0156055	0.0128287	0.0151653	0.0161147	0.0438404	0.0355556	0.0184911	0.0366435	0	0.0452591	0.018379	0.0239349	0.0789889	0.0472144	0.0411946	0.0243487	0.0622568	0.0111321	0.0290501	0.0671742	0.0316676	0.0252738	0.0140578	0.0355787	0.0242395	0.0315424	0.0419404	0.0634518	0.0530879	Bacteria	Gemmatimonadetes	Gemmatimonadetes	Gemmatimonadales	Gemmatimonadaceae	Gemmatimonas
559	GACGAACGCTGGCGGCGTGCTTAACACATGCAAGTCGAACGATGAAGCCGCTTCGGTGGTGGATTAGTGGCGAACGGGTGAGTAACACGTGGGCAATCTGCCCTTCACTCTGGGACAAGC-GCGGTGAAGGATGAGCCCGCGGCCTATCAGCTTGTTGGTGGGGTAATGGCCTACCAAGGCGACGACGGGTAGCCGGCCTGAGAGGGCGACCGGCCACACTGGGACTGAGACACGGCCCAG	0.0101771	0.0168663	0.0471087	0.062422	0.00641437	0.0252755	0	0.0350723	0.00888889	0.0184911	0	0	0	0	0.0159566	0.0112841	0	0.0823893	0.0243487	0	0	0.00968335	0.0111957	0.0253341	0.0336984	0.0492022	0	0	0	0.00699007	0.0230734	0.017696	Bacteria	Actinobacteria	Actinobacteria	Actinomycetales	Streptomycetaceae	Streptomyces
560	AACGAACGCTGGCGGCAGGCTTAACACATGCAAGTCGAACGCACCGCAAGGTGAGTGGCAGACGGGTGAGTAACGCGTGGGAACCTACCCAGTTCTACGGAACAACTGAGGGAAACTTCA-TCGGAATTGGATGGGCCCGCGTTGGATTAGCTAGTTGGTGGGGTAATGGCCTACCAAGGCGACGATCCATAGCTGGTCTGAGAGGATGATCAGCCACACTGGGACTGAGACACGGCCCAG	0.0203542	0.0505988	0.0117772	0.0234082	0.0384862	0.0151653	0.0161147	0.0263043	0.0177778	0	0	0.0503271	0.0226296	0	0.0079783	0.0225683	0.0157381	0.0411946	0.0243487	0.0622568	0.0111321	0.0290501	0	0.0190006	0.0168492	0.00702889	0.0237192	0.0242395	0.0105141	0	0.00576834	0.017696	Bacteria	Proteobacteria	Alphaproteobacteria	Rhizobiales	un_Rhizobiales	un_Rhizobiales
561	AATCAACGCTGGCGGCGCGCCTAACACATGCAAGTCGCACGAGAAAGCGGGAGCAATCCCGCAAGTACAGTGGCGTACGGGTGAGTAACACGTGGATCATCTGCCCTGGAGTGGGGAATA-GCGCTCGAGGAGGAGTCCGCGGCCGATTAGCTAGTTGGCAGGGTAAAAGCCTACCAAGGCTATGATCGGTAGCCGGCCTGAGAGGGCACACGGCCACACTGGCACTGAAACACGGGCCAG	0.0508854	0.067465	0.0353315	0	0.0192431	0.0050551	0.0161147	0.0175362	0.0355556	0	0.0183217	0.0251636	0.0678887	0.0367579	0.0159566	0.0225683	0.0157381	0	0	0.0155642	0.0111321	0.0193667	0.0111957	0.0190006	0.0168492	0	0	0.0242395	0	0	0	0.0294933	Bacteria	Acidobacteria	Acidobacteria_Gp3	Acidobacteria_Gp3	Acidobacteria_Gp3	Gp3
562	AATCAACGCTGGCGGCGTGCCTAACACATGCAAGTCGAACGCGAAAGCCCCGCAAGGGGTCAGTAGAGTGGCAAACGGGTGAGTAACACGTGGGTGACCTGCCTTCGAGTGGGGGATAAC-GCGCTCAAAGAGGGGCCCGCGCCTGATTAGCTAGTTGGTGGGGTAATGGCTCACCAAGGCATCGATCAGTATCCGGCCTGAGAGGGCGGACGGACACACTGGGACTGAGACACGGCCCAG	0.0610625	0.0505988	0.0235544	0.0156055	0.00641437	0.0101102	0.0161147	0	0.0444444	0.0369822	0.0549652	0	0.0452591	0.0551369	0.0478698	0.0112841	0	0.0205973	0	0.0622568	0	0.0290501	0.0111957	0.0253341	0.0084246	0.0140578	0.0118596	0.0363592	0.0210283	0.0349504	0.0403784	0.017696	Bacteria	Acidobacteria	Acidobacteria_Gp6	Acidobacteria_Gp6	Acidobacteria_Gp6	Gp6
563	GACGAACGCTGGCGGCGTGCCTAACACATGCAAGTCGAACGGGACCCGCAAGGGTTCAGTGGCGGACGGGTGCGTAACACGTGAAGAACATGTCTTTCGGTGGGGGATAGCCGGCCCAAC-GCGCCGATCGAGTGCTTCGCGGCCTATCAGCTAGTTGGTGAGGTAATGGCTCACCAAGGCGACGACGGGTAGCTGGTCTGAGAGGATGGCCAGCCACATTGGGACTGAGACACGGCCCAG	0	0	0.0353315	0.0156055	0.0449006	0.0101102	0.0161147	0.0263043	0	0.0369822	0.0732869	0	0.0226296	0.018379	0.0319132	0.0451365	0.0472144	0.0205973	0.0243487	0.0155642	0.0111321	0.0193667	0	0.0190006	0.0168492	0	0.0355787	0.0121197	0.0105141	0.00699007	0.0288417	0.0117973	Bacteria	Gemmatimonadetes	Gemmatimonadetes	Gemmatimonadales	Gemmatimonadaceae	Gemmatimonas
564	AACGAACGCTGGCGGCAGGCCTAACACATGCAAGTCGAACGTGAAGCCACCTTCGGGTGGTGGAAAGTGGCAGACGGGTGAGTAACGCGTGGGAACGTGCCTTTCGGTTCGGAATAACCC-TCGCCGAAAGATCGGCCCGCGTCGGATTAGCTAGTTGGTAGGGTAATGGCCTACCAAGGCGACGATCCGTAGCTGGTCTGAGAGGATGACCAGCCACACTGGGACTGAGACACGGCCCAG	0.0101771	0	0.0117772	0	0.0256575	0.0303306	0.0402868	0.0175362	0	0	0.0366435	0.0251636	0	0	0.0079783	0.0338524	0.0157381	0	0	0	0.0333964	0.0193667	0.0223914	0.0190006	0	0.00702889	0.0118596	0.0363592	0	0.0279603	0.0288417	0.0471893	Bacteria	Proteobacteria	Alphaproteobacteria	Rhizobiales	un_Rhizobiales	un_Rhizobiales
565	GATAAACGCTGGCGGCGTGCTTCAGGCATGCAAGTCGAACGGGTGTCTACCTTCGGGTAGCCACTAGTGGCGGACGGGTGAGTAACGCGTTAGCAACCTGCCCAAAGGTGGGGAATAACT-TCGCCTTTGGAGGGGCTTGCGTCAGATTAGCTTGTTGGTGGGGTAATGGCCTACCAAGGCGACGATCTGTAGCTGGTCTGAGAGGATGGTCAGCCACACGGGGACTGAGATACGGCCCCG	0.0305312	0.0168663	0.0588859	0.0156055	0.0128287	0.0050551	0.0805737	0.0526085	0.0177778	0	0.0366435	0.0251636	0.0226296	0.0367579	0.0079783	0.0451365	0.0157381	0.0205973	0	0.0155642	0.0333964	0.0193667	0.0335871	0.00633352	0.0252738	0.0210867	0.0118596	0.0121197	0	0.0279603	0.0115367	0.035392	Bacteria	Chloroflexi	un_Chloroflexi	un_Chloroflexi	un_Chloroflexi	un_Chloroflexi
566	GACGAACGCTGGCGGCGTGCCTAATACATGCAAGTCGAGCGGGGATGCTTCCGGAAGCCCTTCGGGGCGGAAGGCTGCATCCTAGCGGCGGACGGGTGAGTAACGCGTAGGGAACCTGCC-CCGGTTGGGGATGGCCCTGCGTCCCATTAGCTAGTTGGTGAGGTAACGGCTCACCAAGGCGACGATGGGTAGCCGGCCTGAGAGGGTGACCGGCCACACTGGCACTGAGACACGGGCCAG	0.0407083	0.0168663	0	0	0	0	0.00805737	0	0.0622222	0.0554734	0.128252	0.0754907	0.0678887	0.0735159	0.0159566	0.0677048	0	0	0.0243487	0	0	0.0484168	0.0223914	0.012667	0.0084246	0.00702889	0	0.0121197	0.0105141	0.0279603	0	0.00589866	Bacteria	Firmicutes	un_Firmicutes	un_Firmicutes	un_Firmicutes	un_Firmicutes
567	GACGAACGCTGGCGGCGTGCCTAATACATGCAAGTCGAGCGCGGGAAGCAGGCAGACCTCCTTCGGGAGAGACGCTTGTGGAACGAGCGGCGGACGGGTGAGTAACACGTAGGCAACCTA-CCGCTTACAGATGGGCCTGCGGCGCATTAGCTAGTTGGTGAGGTAACGGCTCACCAAGGCGACGATGCGTAGCCGACCTGAGAGGGTGACCGGCCACACTGGGACTGAGACACGGCCCAG	0	0	0	0.00780275	0	0	0	0	0.0533333	0.0184911	0.0549652	0	0	0.0367579	0.0558481	0.0451365	0.0157381	0.0205973	0.0243487	0.0311284	0	0.0290501	0.0111957	0.00633352	0	0.0351444	0	0.0363592	0	0.0209702	0.0346101	0.0235946	Bacteria	Firmicutes	Bacilli	Bacillales	un_Bacillales	un_Bacillales
568	AACGAACGCTGGCGGCATGCCTAACACATGCAAGTCGAACGCCCTGGGCAACTGGGGAGTGGCGGACGGGTGAGTAACGCGTGGGGACCTGCCTCGAAGTTCGGAATAACCGCGGGAAAC-TCGCTTCGAGAGGGGCCCGCGTCCGATTAGCTAGTTGGCGGGGTAACGGCCCACCAAGGCGACGATCGGTAGCTGGTCTGAGAGGATGATCAGCCACACTGGGACTGAGACACGGCCCAG	0	0	0.0235544	0.0468165	0.0384862	0.0454959	0.0241721	0.00876808	0	0.0184911	0.0183217	0	0	0	0.0159566	0.0225683	0.0629525	0.0205973	0.0486973	0.0311284	0.0222643	0.0193667	0.0223914	0.0253341	0.0505476	0.0351444	0.0474383	0.0121197	0.0105141	0.0838809	0.0403784	0.035392	Bacteria	Proteobacteria	Alphaproteobacteria	Rhodospirillales	Rhodospirillaceae	Dongia
569	ATTGAACGCTGGCGGCATGCCTAACACATGCAAGTCGAACGGTAGCAGGAGCTAGCTTGCTAGCTTGCTGACGAGTGGCGGACGGGTGAGTAATGCGTAGGAATCTGCCCTTAAGTGGGG-GCGCTTGAGGATGAGCCTACGTCGGATTAGCTAGTTGGTGGGGTAAAGGCCTACCAAGGCGACGATCCGTAGCTGGTCTGAGAGGATGACCAGCCACACTGGGACTGAGACACGGCCCAG	0	0	0.0117772	0.031211	0.0513149	0.0353857	0.0161147	0.00876808	0.00888889	0.0184911	0	0	0	0	0.0159566	0.0225683	0	0.061792	0.0486973	0	0.0222643	0	0.0559785	0.0253341	0.0336984	0.00702889	0.0237192	0.0727185	0.0315424	0.0279603	0.0288417	0.0294933	Bacteria	Proteobacteria	Gammaproteobacteria	un_Gammaproteobacteria	un_Gammaproteobacteria	un_Gammaproteobacteria
570	GACGAACGCTGGCGGCGCGCTTAACACATGCAAGTCGAGCGAGAACCAGACCTTCGGGTCTGGGGAAAGCGGCGAACGGGTGAGTAACACGTGGGTAACCCACCCTTGGTACCGGGATAG-CCGACCAAGGACGGGCCCGCGGCGGATTAGCTTGTTGGTGAGGTAACGGCTCACCAAGGCTTCGATCCGTAGCTGGTCTGAGAGGACGATCAGCCACACTGGGACTGAGACACGGCCCAG	0.0305312	0.0337325	0	0	0.00641437	0.0101102	0	0	0.0355556	0.0554734	0.0183217	0.0251636	0.0905182	0.018379	0.0558481	0.0225683	0	0.0205973	0.0243487	0.0155642	0	0.0193667	0	0.0316676	0	0.0351444	0.0355787	0.0121197	0	0.0209702	0.017305	0.0235946	Bacteria	Actinobacteria	Actinobacteria	Solirubrobacterales	un_Solirubrobacterales	un_Solirubrobacterales
571	GACGAACGCTGGCGGCGTGCTTAACACATGCAAGTCGAGCGGTAAGGCCCCTTCGGGGGTACACGAGCGGCGAACGGGTGAGTAACACGTGAGTAACCTGCCCCTGACTCTGGGATAAGC-CCGGTTGGGGATGGGCTCGCGGCCTATCAGCTTGTTGGTGGGGTGATGGCCTACCAAGGCGATGACGGGTAGCCGGCCTGAGAGGGCGACCGGCCACACTGGGACTGAGACACGGCCCAG	0.0407083	0.0168663	0.0235544	0.00780275	0.00641437	0.0050551	0.0483442	0.0526085	0.0177778	0.0739645	0.0183217	0	0	0.0367579	0.0159566	0	0.0157381	0	0	0	0	0.0290501	0.0111957	0.00633352	0	0.00702889	0.0355787	0.0363592	0	0.0349504	0.0230734	0.0117973	Bacteria	Actinobacteria	Actinobacteria	Actinomycetales	Nocardiopsaceae	Thermobifida
572	ATTGAACGCTAGCGGGATGCTTTACACATGCAAGTCGAACGGCAGCGCGACAGAAAGCTTGCTTTCTGTTGGCGGCGAGTGGCGAACGGGTGAGTAATATATCGGAACGTGCCCAGTAGC-TCACTATTGGAGCGGCCGATATCGGATTAGCTGGTTGGTGGGGTAAAGGCCTACCAAGGCATCGATCCGTAGCTGGTTTGAGAGGACGACCAGCCACACTGGGACTGAGACACGGCCCAG	0.0305312	0.0168663	0.0353315	0.0234082	0.0320718	0.0252755	0.00805737	0.00876808	0.0177778	0.0369822	0	0	0	0.018379	0.0159566	0	0.0314762	0.0411946	0	0	0	0.00968335	0.0335871	0.00633352	0.0252738	0.0140578	0.0355787	0.0242395	0.0105141	0	0.0230734	0.017696	Bacteria	Proteobacteria	Betaproteobacteria	Burkholderiales	Alcaligenaceae	Castellaniella
573	ATTGAACGCTGGCGGCATGCTTTACACATGCAAGTCGAACGGCAGCGGGGGCTTCGGCCCGCCGGCGAGTGGCGAACGGGTGAGTAATACATCGGAACGTATCCTTGAGTGGGGAATAAC-GCGCTGAAGGAGCGGCCGATGTCTGATTAGCTTGTTGGTGAGGTAAAGGCTTACCAAGGCAACGATCAGTAGTTGGTCTGAGAGGACGGCCAACCACACTGGGACTGAGACACGGCCCAG	0.111948	0.0843313	0.0235544	0.031211	0.0384862	0.0151653	0.0161147	0	0.08	0	0.0183217	0.0503271	0.0678887	0.018379	0.0079783	0	0	0	0.0243487	0	0	0	0	0	0.0084246	0.00702889	0	0	0.0105141	0	0	0	Bacteria	Proteobacteria	Betaproteobacteria	Nitrosomonadales	Nitrosomonadaceae	Nitrosomonas
574	GACGAACGCTGGCGGCGTGCTTAACACATGCAAGTCGAACGGAAAGGCCCTGCTTGCAGGGTACTCGAGTGGCGAACGGGTGAGTAACACGTGGGTGATCTGCCCTGCACTTCGGGATAA-TCGGTGTAGGATGAGCTCGCGGCCTATCAGCTTGTTGGTGGGGTAATGGCCTACCAAGGCGGCGACGGGTAGCCGGCCTGAGAGGGTGTACGGCCACATTGGGACTGAGATACGGCCCAG	0.0203542	0.0168663	0.0117772	0.031211	0.0449006	0.0050551	0.00805737	0.0175362	0	0	0	0.201309	0	0	0.0079783	0	0.125905	0.185376	0	0.0155642	0.0222643	0.0290501	0.0111957	0	0	0.0702889	0.0118596	0.048479	0.0841131	0	0.0115367	0.0117973	Bacteria	Actinobacteria	Actinobacteria	Actinomycetales	Corynebacteriaceae	Corynebacterium
575	GACGAACGCTGGCGGCGTGCTTAACACATGCAAGTGGAGCGACGAACCAGGGCTTGCCCTGGGGCAAAGCCGCGAACGGGTGAGTAACACGTGGGTAACCTGCCCTGATGATTGGGACAA-CCGCATCAGGATGGGCCCGCGGCCCATTAGCTTGTTGGTGGGGTAACGGCCTACCAAGGCTTCGATGGGTAGCTGGTCTGAGAGGACGATCAGCCACACTGGGACTGAGACACGGCCCAG	0.0305312	0.0505988	0	0.00780275	0.0192431	0.0303306	0.0483442	0.0438404	0.0177778	0.0184911	0.0549652	0.0503271	0	0.018379	0.0159566	0.0112841	0.0157381	0.0205973	0	0.0155642	0.0222643	0.00968335	0	0.00633352	0.0084246	0.00702889	0.0118596	0.0242395	0	0.0419404	0.017305	0.0294933	Bacteria	Actinobacteria	Actinobacteria	Solirubrobacterales	Conexibacteraceae	Conexibacter
577	AACGAACGCTGGCGGCATGCCTAACACATGCAAGTCGAACGAGACCTTCGGGTCTAGTGGCGCACGGGTGCGTAACGCGTGGGAATCTGCCCTCAGGTACGGAACAACTCAGGGAAACTT-TCGCCTGAGGATGAGCCCGCGTCGGATTAGCTAGTTGGTGAGGTAAAGGCTCACCAAGGCGACGATCCGTAGCTGGTCTGAGAGGATGATCAGCCACACTGGGACTGAGACACGGCCCAG	0	0.0168663	0	0.0234082	0	0.0101102	0.0483442	0.0438404	0	0.0184911	0.0183217	0	0	0	0.0398915	0.0225683	0.0314762	0.0205973	0	0.0311284	0.0111321	0.00968335	0.0223914	0.012667	0.0252738	0.00702889	0	0.048479	0.0105141	0.0279603	0.017305	0.0117973	Bacteria	Proteobacteria	Alphaproteobacteria	Sphingomonadales	Sphingomonadaceae	un_Sphingomonadaceae
578	ATTGAACGCTGGCGGCATGCTTTACACATGCAAGTCGAACGGGGTGAGGGGGCAACTCCTCATTCAGTGGCGAACGGGTGAGTAATGCATCGGAACGTGTCCCGTAGTGGGGGATAACGC-GTGCTAGGGGGGCGGCCGATGTCCGATTAGCTAGTTGGTGGGGTAATGGCCCACCAAGGCTGCGATCGGTAGCTGGTCTGAGAGGATGATCAGCCACACTGGGACTGAGACACGGCCCAG	0	0.0168663	0	0.0156055	0.00641437	0	0	0.00876808	0.0355556	0	0.0366435	0.0251636	0.0226296	0	0.0159566	0.0451365	0	0	0.0243487	0.0155642	0.0111321	0.0290501	0.0335871	0.0443347	0.0168492	0.0281156	0.0474383	0.0605987	0.0420566	0	0.017305	0.0235946	Bacteria	Proteobacteria	Betaproteobacteria	un_Betaproteobacteria	un_Betaproteobacteria	un_Betaproteobacteria
579	AACGAACGCTGGCGGCAGGCTTAACACATGCAAGTCGAACGCCCGTAGCAATACGGGAGTGGCAGACGGGTGAGTAACGCGTGGGAATCTTCCCAAAGGTACGGAACAACTCAGGGAAAC-TCGCCTTTGGATGAGCCCGCGTTGGATTAGCTAGTTGGTGGGGTAACGGCCTACCAAGGCGACGATCCATAGCTGATCTGAGAGGATGATCAGCCACACTGGGACTGAGACACGGCCCAG	0.0203542	0	0.0235544	0.0234082	0.0192431	0.0101102	0.0402868	0.0350723	0.0266667	0.0184911	0.0549652	0.0251636	0.0678887	0.0735159	0.0159566	0.0338524	0.0629525	0.0205973	0.0243487	0.0311284	0.0111321	0.0387334	0.0223914	0.0380011	0.042123	0.0140578	0.0592979	0.0242395	0.0420566	0.0209702	0.0403784	0.0412906	Bacteria	Proteobacteria	Alphaproteobacteria	un_Alphaproteobacteria	un_Alphaproteobacteria	un_Alphaproteobacteria
580	AACGAACGCTGGCGGCAGGCCTAACACATGCAAGTCGAACGCCCCGCAAGGGGAGTGGCAGACGGGTGAGTAACGCGTGGGAACCTACCCAGTGGTACGGAATAGCCCAGGGAAACCTGG-TCGCCATTGGATGGGCCCGCGTCGGATTAGCTAGTTGGTGGGGTAATGGCTCACCAAGGCGACGATCCGTAGCTGGTCTGAGAGGATGATCAGCCACACTGGGACTGAGACACGGCCCAG	0.0101771	0.0168663	0.0117772	0.00780275	0.00641437	0	0	0.0175362	0.0355556	0	0	0	0.0226296	0.0551369	0.0159566	0.0338524	0.0629525	0.0411946	0.073046	0.0311284	0.0222643	0.0193667	0.0223914	0.012667	0.0252738	0.00702889	0	0.0242395	0.0105141	0.0279603	0.0403784	0.0235946	Bacteria	Proteobacteria	Alphaproteobacteria	Rhizobiales	Hyphomicrobiaceae	un_Hyphomicrobiaceae
581	AACGAACGCTGGCGGCGCGTCTTAAGCATGCAAGTCGAACGGCAGGCGGGTAGCAATACCTGCTGAGAGTGGCGAACGGGTGAGTAACGCGTAGGTGATCTGCCCTCAGGTCGGGGATAG-TCGCCTGGGGATGAGCCTGCGTCCGATTAGCTAGTTGGCGGGGTAAGGGCCCACCAAGGCAGTGATCGGTAGCCGGCCTGAGAGGGTGGACGGCCACACTGGAACTGAGACACGGTCCAG	0	0.0337325	0.0117772	0.00780275	0	0	0	0.00876808	0.0533333	0.0924556	0.0183217	0.0754907	0.0226296	0.0551369	0.0159566	0.0564207	0.0157381	0	0.0243487	0	0.0556607	0.00968335	0.0111957	0.012667	0.0252738	0.0210867	0.0118596	0.0363592	0.0210283	0.0139801	0.017305	0.0235946	Bacteria	un_Bacteria	un_Bacteria	un_Bacteria	un_Bacteria	un_Bacteria
582	AGCGAACGCTGGCGGCGTACTTAACACATGCAAGTCGAACGAGAATCGCCTGTGTAGCAATACATAGGTGGTTCTAGTGGCGCACGGGTGAGTAACACGTGGGCAACCTGCCCTTGAGTC-CCGCTCTTGGAGGGGCTCGCGGCCTATCAGCTAGTTGGTGAGGTAACGGCTCACCAAGGCTATGACGGGTAGCTGGTCTGAGAGGACGACCAGCCACACGGGAACTGAGACACGGTCCCG	0	0.0168663	0.0235544	0.00780275	0.00641437	0	0.0564016	0.00876808	0.0266667	0.0184911	0	0	0.0226296	0	0.0079783	0.0225683	0	0	0.0243487	0.0311284	0.0222643	0.0290501	0.0111957	0.012667	0.0084246	0.0210867	0.0474383	0.0242395	0.0210283	0	0.017305	0.0235946	Bacteria	un_Bacteria	un_Bacteria	un_Bacteria	un_Bacteria	un_Bacteria
583	GACGAACGCTGGCGGCGTGCTTAACACATGCAAGTGGTGCGACGAACCAGGGCTTGCCCTGGGGCAAAGCCGCGAACGGGTGAGTAACACGTGAGTAACCTGCCCCGATGACCGGGACAA-CCGCATTGGGAGGGGCTCGCGGCCCATTAGCTTGTTGGTGGGGTAACGGCCTACCAAGGCAACGATGGGTAGCTGGTCTGAGAGGACGATCAGCCACACTGGGACTGAGACACGGCCCAG	0.0203542	0	0.0588859	0	0.00641437	0.0101102	0.00805737	0.00876808	0.106667	0.0369822	0.0916086	0.0251636	0.0452591	0.018379	0.0398915	0.0225683	0.0629525	0.0205973	0.0973947	0.0311284	0.0222643	0.0290501	0.0559785	0.0316676	0.0168492	0.0421733	0.0830171	0.0363592	0.0210283	0.0349504	0.0634518	0.0471893	Bacteria	Actinobacteria	Actinobacteria	Solirubrobacterales	un_Solirubrobacterales	un_Solirubrobacterales
584	GATGAACGCTAGCGGCAGGCCTAATACATGCAAGTCGAACGGTAAGCCTTCCTTCGGGAAGGCACGAGTGGCGGACGGGTGCGTAACGCGTATGCAACCTGGCCCTTACTGGGGGATAGC-TCGGTAAGGGATGGGCATGCGTGCCATTAGCTAGTTGGTAGTGTAACGGACTACCAAGGCCACGATGGCTAGGGGGTCTGAGAGGATGATCCCCCACACTGGTACTGAGATACGGACCAG	0.0915937	0.101198	0.0824402	0.0780275	0.0192431	0.0151653	0.0241721	0.0876808	0.0355556	0.0184911	0	0.0251636	0.0226296	0.018379	0.0079783	0.0112841	0	0.0205973	0	0.0311284	0	0.00968335	0.0223914	0.012667	0.0168492	0	0	0	0	0	0.0230734	0.017696	Bacteria	Bacteroidetes	Sphingobacteria	Sphingobacteriales	Flammeovirgaceae	un_Flammeovirgaceae
585	AATCAACGCTGGCGGCGCGCTTAACACATGCAAGTCGCACGAGAAAGGGAGCAATCCTAAGTAAAGTGGCGCACGGGTGAGTAACACGTGGATCATCTACCTTTTAGTGGGGAATACCTC-GCGCTGAAAGAGGAGTCCGCGGCCGATTAGCTAGTTGGCGGGGTAACGGCCCACCAAGGCGAAGATCGGTAGCCGGCCTGAGAGGGCACACGGCCACACTGGCACTGAAACACGGGCCAG	0.0305312	0.0337325	0.0353315	0.00780275	0.0256575	0	0	0.00876808	0.0533333	0.0739645	0	0.0251636	0.135777	0	0	0.0564207	0.0472144	0.0205973	0.0243487	0	0.0111321	0.0193667	0.0223914	0.0316676	0.0168492	0.00702889	0.0118596	0.0121197	0.0105141	0.0139801	0.00576834	0.0235946	Bacteria	Acidobacteria	Acidobacteria_Gp3	Acidobacteria_Gp3	Acidobacteria_Gp3	Gp3
586	AGCGAACGCTGGCGGCAGGCCTAACACATGCAAGTCGAGCGGGCGCAGCAATGCGTCAGCGGCAGACGGGAGAGTAACACGTGGGAACGCGCCCTTCGGTTCGGAATAACCCAGGGAAAC-TCGCCGAAGGAACGGCCCGCGTCCGATTAGCTTGTTGGTGAGGTAATGGCTCACCAAGGCGACGATCGGTAGCTGGTCTAAGAGGATGATCAGCCTCACTGGGACTGAGACACGGCCCAG	0.0101771	0.0337325	0.0117772	0.00780275	0.0128287	0.0151653	0.0322295	0.0350723	0.0177778	0.0184911	0.0183217	0	0.0226296	0.018379	0	0.0225683	0.0314762	0	0	0	0.0445286	0.00968335	0	0	0	0.0140578	0.0118596	0.0242395	0.0210283	0.0279603	0.0115367	0.0117973	Bacteria	Proteobacteria	Alphaproteobacteria	Rhizobiales	Xanthobacteraceae	Pseudolabrys
587	ATTGAACGCTAGCGGGATGCTTTACACATGCAAGTCGAACGGCAGCGCAGACTTCGGTCTGGCGGCGAGTGGCGAACGGGTGAGTAATATATCGGAACGTGCCCAGTAGCGGGGGATAAC-TCACTATTGGAGCGGCCGATATCAGATTAGCTAGTTGGTGAGGTAAAGGCTCACCAAGGCGACGATCTGTAGCTGGTTTGAGAGGACGACCAGCCACACTGGGACTGAGACACGGCCCAG	0.0610625	0.0337325	0.0471087	0.117041	0.0769724	0.0606612	0.0483442	0.0789128	0.0355556	0	0	0.0251636	0.0452591	0	0.0239349	0.0112841	0.0314762	0.0205973	0.0243487	0.0155642	0.0556607	0.0677835	0	0.0253341	0.0505476	0.0140578	0.0118596	0.0363592	0.0210283	0.0209702	0.0288417	0.0235946	Bacteria	Proteobacteria	Betaproteobacteria	Burkholderiales	Alcaligenaceae	Pusillimonas
588	GACGAACGCTGGCGGCGCGCTTAACACATGCAAGTCGAACGGGTGCCTTCGGGCGCCAGTGGCGAACGGGTGCGTAACACGTGAGTGACCTGCCCCTGTGCGGGGGATAACCCGGGGAAA-GTGTGCAGGGAGGGGCTCGCGGCGTATCAGGTAGTTGGTGAGGTAACGGCTCACCAAGCCGACGACGCGTAGGGGGTCTGAGAGGATGGCCCCCCACATTGGGACTGAGATACGGCCCAG	0.0610625	0.151796	0.0235544	0.0156055	0.0513149	0.0101102	0.0322295	0.0350723	0.0622222	0.0739645	0.0549652	0	0.0678887	0.0551369	0.0239349	0.0225683	0	0.0205973	0	0	0.0111321	0.00968335	0	0.00633352	0	0	0.0237192	0.0121197	0.0105141	0.0139801	0.0403784	0.0235946	Bacteria	Gemmatimonadetes	Gemmatimonadetes	Gemmatimonadales	Gemmatimonadaceae	Gemmatimonas
589	ATTGAACGCTGGCGGCATGCTTTACACATGCAAGTCGAGCGGCAGCGCGGGGGCAACCCTGGCGGCGAGCGGCGAACGGGTGAGTAACACATCGGAACGTATCCCGTAGTGGGGGATAAC-ACGCTATGGGAGCGGCCGATGTCCGATTAGCTAGTTGGTGGGGTAAAGGCCTACCAAGGCGACGATCGGTAGCTGGTCTGAGAGGATGATCAGCCACACTGGGACTGAGACACGGCCCAG	0	0	0	0	0	0	0.00805737	0.00876808	0.0355556	0.0369822	0.146574	0.0251636	0	0.018379	0.0319132	0.0451365	0.0314762	0.061792	0	0.0466926	0.0222643	0.0581001	0.0447828	0.0253341	0.042123	0.0281156	0.0355787	0.0605987	0.0525707	0.0419404	0.0230734	0.035392	Bacteria	Proteobacteria	Betaproteobacteria	un_Betaproteobacteria	un_Betaproteobacteria	un_Betaproteobacteria
590	AATCAACGCTGGCGGCGTGCCTAACACATGCAAGTCGAACGCGAAAGCCCCGCAAGGGGTGAGTAGAGTGGCAAACGGGTGAGTAACACGTGGGTGATCTGCCTCAGAGTGGGGGATAAC-ACGCTTAGAGAGGAGCCCGCGGCCGATTAGCTAGTTGGTGAGGTAACGGCTCACCAAGGCAACGATCGGTATCCGGCCTGAGAGGGCGGACGGACACACTGGGACTGAGACACGGCCCAG	0	0	0.0117772	0	0.00641437	0.0101102	0	0	0.0266667	0	0	0.0251636	0.0452591	0.018379	0.0319132	0.0225683	0.0157381	0	0.073046	0	0.0222643	0.0290501	0.0447828	0.0316676	0.0168492	0.0140578	0.0118596	0.0121197	0.0315424	0.0209702	0.0346101	0.0235946	Bacteria	Acidobacteria	Acidobacteria_Gp6	Acidobacteria_Gp6	Acidobacteria_Gp6	Gp6
591	GACGAACGCTGGCGGCGTGCTTAACACATGCAAGTCACGGGGGGGTCGCAAGACTCAACCGGCGAACGGGTGCGTAACACGTGAGCGACCTGCCCCGGTCAGGGGGATAGCCGGCCCAAC-GCGGACTGGGAGGGGCTCGCGGCCTATCAGCTAGTTGGCGGGGTGACGGCCCACCAAGGCGGCGACGGGTAGCTGGTCTGAGAGGATGGCCAGCCACATTGGGACTGAGAGACGGCCCAG	0.0101771	0	0.0117772	0.00780275	0.0128287	0.0050551	0.0161147	0	0	0.0184911	0.0549652	0	0.0226296	0	0.0159566	0.0225683	0.0157381	0.0205973	0.0243487	0.0311284	0.0556607	0.0290501	0.0559785	0.0253341	0	0.0210867	0.0592979	0.0121197	0.0210283	0.0209702	0.017305	0.017696	Bacteria	Gemmatimonadetes	Gemmatimonadetes	Gemmatimonadales	Gemmatimonadaceae	Gemmatimonas
592	GACGAACGCTGGCGGCGTGCTTAACACATGCAAGTCGAACGGTGAACTCGGAGCTTGCTCCGGGGGATCAGTGGCGAACGGGTGAGTAACACGTGAGTAACCTGCCCCAGACTCTGGGAT-TCGGTCTGGGATGGACTCGCGGCCTATCAGCTTGTTGGTGAGGTAACGGCTCACCAAGGCGACGACGGGTAGCCGGCCTGAGAGGGCGACCGGCCACACTGGAACTGAGACACGGTCCAG	0	0	0	0	0.0192431	0	0.00805737	0.00876808	0.0444444	0.0739645	0.0183217	0.0503271	0.0678887	0.110274	0.0398915	0.0112841	0	0	0.0486973	0.0311284	0.0111321	0.0193667	0	0.012667	0	0.0281156	0.0355787	0	0	0.00699007	0	0.00589866	Bacteria	Actinobacteria	Actinobacteria	Actinomycetales	Demequinaceae	Demequina
593	ATTGAACGCTGGCGGCATGCCTTACACATGCAAGTCGAGCGGCAGCGCGGGGGCAACCCTGGCGGCGAGCGGCGGACGGGTGAGTAATGCATCGGAACGTGTCCTCTTGTGGGGGATAAC-GCGCGAGAGGAGCGGCCGATGCCCGATTAGCTAGTTGGTGGGGTAAAAGCTCACCAAGGCGACGATCGGTAGCTGGTCTGAGAGGACGACCAGCCACACTGGGACTGAGACACGGCCCAG	0.0101771	0	0.0235544	0.031211	0.0577293	0.0151653	0.0966884	0.0526085	0.00888889	0.0369822	0.0183217	0.0251636	0	0.018379	0.0638264	0.0338524	0.0472144	0	0.0243487	0.0155642	0.0445286	0.0484168	0.0335871	0.0506682	0.0084246	0.0210867	0.0592979	0.048479	0.0315424	0.0489305	0.0519151	0.0530879	Bacteria	Proteobacteria	Betaproteobacteria	un_Betaproteobacteria	un_Betaproteobacteria	un_Betaproteobacteria
594	ATTGAACGCTGGCGGCATGCCTAACACATGCAAGTCGAACGGTAACGCGGGGGCAACCCTGGCGACGAGTGGCGGACGGGTGAGTAATACGTAGGAATCTGCCCATTAGTGGGGGACAAC-GTGCTAATGGATGAGCCTACGTCGGATTAGCTAGTTGGTAGGGTAACGGCCTACCAAGGCGACGATCCGTAGCTGGTCTGAGAGGACGATCAGCCACACTGGGACTGAGACACGGCCCAG	0	0	0.0235544	0	0.00641437	0.0050551	0.0725163	0.0438404	0	0.0184911	0	0	0	0.018379	0.0239349	0	0	0.0205973	0	0.0155642	0.0222643	0.0387334	0.0223914	0.012667	0.0084246	0	0.0118596	0.048479	0.0315424	0.00699007	0.0115367	0.00589866	Bacteria	Proteobacteria	Gammaproteobacteria	un_Gammaproteobacteria	un_Gammaproteobacteria	un_Gammaproteobacteria
595	GACGAACGCTGGCGGCGTGCTTAACACATGCAAGTCACGGGGGCGGAGCAATCCGCAACCGGCGAACGGGTGCGTAACACGTGAGCGACCTGCCTCCCCGCGGGGGATAGCCGGCCCAAC-GGGCGGGGAGAGGGGCTCGCGGCCTATCAGCTAGTTGGCGGGGTGACGGCCCACCAAGGCGGTGACGGGTAGCTGGTCTGAGAGGATGGCCAGCCACATTGGGACTGAGAGACGGCCCAG	0	0	0.0117772	0	0	0	0	0.00876808	0.0266667	0.0369822	0	0	0	0.0367579	0.0079783	0.0225683	0	0.061792	0.0486973	0.0311284	0.0111321	0.0484168	0.0335871	0.0316676	0.0336984	0.0140578	0.0474383	0.0605987	0.0210283	0.0349504	0.0403784	0.017696	Bacteria	Gemmatimonadetes	Gemmatimonadetes	Gemmatimonadales	Gemmatimonadaceae	Gemmatimonas
596	AACGAACGCTGGCGGCATGCCTAACACATGCAAGTCGAACGGGATCCGGGGCTTCGGCTCCGGTGAGAGTGGCGCACGGGTGAGTAACGCGTGGGAACCTGCCCAGAGGTAGGGAATAAC-TCGCCTTTGGAGGGGCCCGCGTCGGATTAGGTAGTTGGTGGGGTAACGGCCTACCAAGCCGACGATCCGTAGCTGGTCTGAGAGGATGATCAGCCACACTGGGACTGAGACACGGCCCAG	0.0101771	0.0337325	0.0117772	0.0390137	0.00641437	0.0050551	0.0161147	0.0175362	0.0177778	0.0369822	0.0366435	0.100654	0.0678887	0.0551369	0.0159566	0	0.0157381	0	0.0243487	0.0311284	0.0222643	0.00968335	0	0.00633352	0	0.0351444	0.0118596	0.0242395	0.0105141	0	0.0346101	0.0117973	Bacteria	Proteobacteria	Alphaproteobacteria	Rhodospirillales	Rhodospirillaceae	un_Rhodospirillaceae
597	ATTGAACGCTGGCGGCATGCCTTACACATGCAAGTCGAACGGCAGCACGGGAGCAATCCTGGTGGCGAGTGGCGAACGGGTGAGTAATATATCGGAACGTGCCCAGTAATGGGGGATAGC-GCGTTATTGGAGCGGCCGATATCAGATTAGCTTGTTGGTGGGGTAAAAGCCTACCAAGGCGACGATCTGTAGCTGGTCTGAGAGGACGACCAGCCACACTGGGACTGAGACACGGCCCAG	0.0305312	0.0843313	0.0471087	0.0780275	0.0256575	0.0353857	0.0241721	0.0438404	0.0266667	0.0184911	0	0	0	0	0.0079783	0.0112841	0.0314762	0	0	0	0.0111321	0.00968335	0.0335871	0.0190006	0.0084246	0.0281156	0.0118596	0	0	0.0139801	0.0403784	0.00589866	Bacteria	Proteobacteria	Gammaproteobacteria	Pseudomonadales	Pseudomonadaceae	Rhizobacter
598	GACGAACGCTGGCGGCGTGCTTAACACATGCAAGTCGAGCGGTAAGGCCCCTTCGGGGGTACACGAGCGGCGAACGGGTGAGTAACACGTGAGCAATCTGCCCTTCACTTCGGGATAACT-GCGGTGGAGGATGAGCTCGCGGCCTATCAGCTTGTTGGTGGGGTAATGGCCCACCAAGGCAACGACGGGTAGCCGGCCTGAGAGGGTGACCGGCCACACTGGGACTGAGACACGGCCCAG	0.0203542	0.118064	0.0588859	0.0858302	0.0449006	0.101102	0.0886311	0.0964489	0.0355556	0	0.0366435	0	0.0226296	0.0735159	0.0079783	0.0112841	0.0157381	0	0.0243487	0.0311284	0	0.00968335	0	0.0316676	0.0336984	0.0210867	0.0118596	0.0121197	0	0.0279603	0.0461467	0.0412906	Bacteria	Actinobacteria	Actinobacteria	Actinomycetales	Nocardioidaceae	Marmoricola
599	AATCAACGCTGGCGGCGCGCTTAACACATGCAAGTCGAACGAGAAAGGGAGCAATCCTGAGTAAAGTGGCGCACGGGTGAGTAACACGTGGGTAATCTACCCTCTGGTGGGGAATAACTC-TCGCCGGAGGAGGAGCCCGCGGCCGATTAGCTGGATGGTAGGGTAACGGCCTACCATGGCTGAGATCGGTAGCCGGCCTGAGAGGGCACACGGCCACACTGGCACTGAAACACGGGCCAG	0.0101771	0	0.0471087	0.0156055	0.0256575	0.0050551	0.0966884	0.0438404	0.0177778	0	0	0	0	0	0.0159566	0	0.0157381	0	0.0243487	0	0	0.00968335	0.0223914	0.012667	0.0168492	0.00702889	0.0237192	0.0605987	0.0105141	0.00699007	0.017305	0.0235946	Bacteria	Acidobacteria	Acidobacteria_Gp3	Acidobacteria_Gp3	Acidobacteria_Gp3	Gp3
600	ATTGAACGCTGGCGGCATGCCTTACACATGCAAGTCGAACGGTAACGCGGGCTTCGGCCTGGCGACGAGTGGCGAACGGGTGAGTAATACATCGGAACGTACCCAGTAGTGGGGGATAAC-GCGCTATTGGAGCGGCCGATGTCCGATTAGCTAGTTGGTGGGGTAAAGGCCTACCAAGGCGACGATCGGTAGCTGGTCTGAGAGGATGATCAGCCACACTGGGACTGAGACACGGCCCAG	0.0203542	0.0168663	0.0117772	0	0.0128287	0.0101102	0.0161147	0	0.0444444	0.0554734	0.0183217	0.0754907	0	0.0367579	0.0079783	0	0.0472144	0	0	0.0311284	0.0111321	0	0.0223914	0.012667	0.0168492	0.0210867	0.0355787	0.0242395	0.0105141	0.0139801	0.0115367	0.017696	Bacteria	Proteobacteria	Betaproteobacteria	un_Betaproteobacteria	un_Betaproteobacteria	un_Betaproteobacteria
601	GATGAACGCTAGCGGCAGGCTTAACACATGCAAGTCGAGGGGTAACAGGGAGCTTGCTCCGCTGACGACCGGCGCACGGGTGCGTAACGCGTATGCAATCTACCTTTTACAGGGGGATAG-TCGGTAAAAGATGAGCATGCGTTCTATTAGCTAGATGGTAAGGTAACGGCTTACCATGGCAACGATAGATAGGGGCCCTGAGAGGGGGATCCCCCACACTGGTACTGAGACACGGACCAG	0.0203542	0.0168663	0.0588859	0.101436	0.0128287	0.0606612	0.0322295	0.0526085	0.0355556	0	0	0.0503271	0.0452591	0.0551369	0.0319132	0	0.0157381	0.0411946	0	0.0155642	0	0	0.0111957	0.012667	0.0168492	0.0281156	0	0.0121197	0	0	0.0230734	0.0412906	Bacteria	Bacteroidetes	Flavobacteria	Flavobacteriales	Flavobacteriaceae	un_Flavobacteriaceae
602	GATGAACGCTAGCGGCAGGCCTAATACATGCAAGTCGAGGGGCAGCGGGTCCAGCAATGGATGCCGGCGACCGGCGCACGGGTGCGTAACACGTATGAAACCTACCCATAACTTGGGAAT-TCGGTTATGGAAGGTCATGCGTACGATTAGCTAGTTGGTGAGGTAACGGCTCACCAAGGCGACGATCGTTAGGGGACCTGAGAGGGTGATCCCCCACACTGGTACTGAGATACGGACCAG	0	0	0.0235544	0.00780275	0.0256575	0.0202204	0.0483442	0.0175362	0	0	0	0	0	0	0.0319132	0	0.0314762	0	0.0243487	0.0155642	0.0222643	0.0193667	0.0335871	0.0316676	0	0.00702889	0.0355787	0.0121197	0.0315424	0.0279603	0.017305	0.00589866	Bacteria	Bacteroidetes	Sphingobacteria	Sphingobacteriales	Cytophagaceae	Sporocytophaga
603	AACGAACGCTGGCGGCATGCCTAACACATGCAAGTCGAACGATCCCTTCGGGGATAGTGGCGCACGGGTGCGTAACGCGTGGGAACCTGCCCTTAGGTTCGGAATAACTCCCCGAAAGGG-TCGCCTTTGGATGGGCCCGCGTTGGATTAGCTAGTTGGTGGGGTAAAGGCCTACCAAGGCGACGATCCATAGCTGGTCTTAGAGGATGATCAGCCACACTGGGACTGAGACACGGCCCAG	0	0.0168663	0	0	0.0192431	0.0101102	0	0	0.0177778	0.0184911	0	0.0251636	0.0226296	0.0367579	0.0159566	0.0112841	0	0	0.0243487	0.0311284	0.0222643	0	0.0111957	0.00633352	0.0084246	0.00702889	0.0474383	0.0121197	0.0105141	0.0279603	0.0288417	0.017696	Bacteria	Proteobacteria	Alphaproteobacteria	Sphingomonadales	Erythrobacteraceae	un_Erythrobacteraceae
604	AATCAACGCTGGCGGCGTGCCTAACACATGCAAGTCGAACGAGAAAGAAGGCTTCGGTCTTCGAGTAAAGTGGCGAACGGGTGAGTAACGCGTGGGTAATCTACCCTTTTGTGGGGGATA-TCGCAGAAGGAGGAGCCCGCGTCCGATTAGCTAGTTGGTGAGGTAAAGGCTCACCAAGGCAACGATGGGTAGCCGGTCTGAGAGGACGGACGGCCACACTGGGACTGAGACACGGCCCAG	0.0203542	0.0168663	0.0117772	0	0.00641437	0.0151653	0	0.0263043	0.0444444	0.0369822	0.0183217	0.0251636	0.0678887	0.018379	0.0159566	0.0225683	0	0	0.0243487	0.0155642	0	0	0.0111957	0.012667	0.0252738	0.0140578	0	0	0.0315424	0.00699007	0.00576834	0.0294933	Bacteria	Acidobacteria	Acidobacteria_Gp21	Acidobacteria_Gp21	Acidobacteria_Gp21	Gp21
605	GACGAACGCTGGCGGCGCGCTTAACACATGCAAGTCGAGCGAGAACCTAGGCTTCGGCCTAGGGGACAGCGGCGAACGGGTGAGTAACACGTGGGTAATCTGCCCTCGACATCGGGATAG-CCGGTCGAGGAGGAGCCCGCGGCGGATTAGCTTGTTGGTGAGGTAACGGCCCACCAAGGCGACGATCCGTAGCTGGTCTGAGAGGACGATCAGCCACACTGGGACTGAGACACGGCCCAG	0.0203542	0.0168663	0	0.0234082	0.0128287	0.0050551	0.0161147	0.00876808	0.0266667	0	0.0916086	0.0754907	0.0226296	0	0.0239349	0.0225683	0.0157381	0	0	0.0155642	0.0111321	0.0387334	0.0223914	0	0.0168492	0.0140578	0.0355787	0.0363592	0	0.0349504	0.0288417	0.0471893	Bacteria	un_Bacteria	un_Bacteria	un_Bacteria	un_Bacteria	un_Bacteria
606	GATGAACGCTGGCGGCGTGCCTAACACATGCAAGTCGAACGTGAAGATACCAACTGTTAGCAATAACAAGCGGTATCGGAAAGTGGCGAACGGGTGAGTAACACGTGGGTAACCTGCCGC-GTGCTGTGCGAGGGGCCTGCGTCCGATTAGTTAGTTGGTGAGGTAACGGCTCACCAAGACGATGATCGGTAGCTGGTCTGAGAGGATGATCAGCCACACGGGAACTGAGACACGGTCCCG	0.0203542	0.0337325	0	0.00780275	0	0.0050551	0.00805737	0.00876808	0.0355556	0.0369822	0.0549652	0.0503271	0.0452591	0.018379	0.0079783	0.0112841	0	0.0411946	0	0	0.0222643	0	0.0335871	0.0253341	0	0.0140578	0.0118596	0	0	0.0349504	0.0403784	0	Bacteria	Chloroflexi	Caldilineae	Caldilineales	Caldilineaceae	Caldilinea
607	AATCAACGCTGGCGGCGCGCTTAACACATGCAAGTCGGACGAGAAAGGGGAGCAATCCCTGAGTAAAGTGGCGTACGGGTGAGTAACACGTGGGTAATCTACCTTTTGGTGGGGAATAAC-TCGCCGAAAGAGGAGCCCGCGGCTGATTAGCTAGTTGGTGAGGTAAAGGCTCACCAAGGCAATGATCGGTAGCCGGCCTGAGAGGGCACACGGCCACACTGGCACTGAAACACGGGCCAG	0.0101771	0.0337325	0.0353315	0.0156055	0	0.0202204	0.0322295	0.00876808	0.0266667	0.0184911	0	0	0.0226296	0.018379	0.0478698	0.0112841	0	0	0	0	0.0111321	0.0387334	0.0223914	0.0190006	0.0168492	0.0351444	0.0118596	0.0242395	0.0420566	0.00699007	0.0288417	0.017696	Bacteria	Acidobacteria	Acidobacteria_Gp3	Acidobacteria_Gp3	Acidobacteria_Gp3	Gp3
608	ATTGAACGCTGGCGGCATGCCTTACACATGCAAGTCGAACGCGAAAGCGGGGGCAACCCTGCCGGTAGAGTGGCGAACGGGTGAGTAATACATCGGAACGTGCCCAGGAGTGGGGGATAG-GCGCTCATGGAGCGGCCGATGTCGGATTAGCTAGTTGGTGGGGTAAGAGCCTACCAAGGCGACGATCCGTAGCTGGTCTGAGAGGATGATCAGCCACACTGGGACTGAGACACGGCCCAG	0.0203542	0	0.0235544	0.0234082	0.0192431	0.0050551	0	0.0175362	0.0444444	0.0554734	0	0	0	0	0.0239349	0.0338524	0.0157381	0.0205973	0.0243487	0	0.0333964	0.0193667	0.0335871	0.012667	0.0084246	0.0140578	0.0237192	0.0242395	0.0105141	0.00699007	0.0115367	0.0117973	Bacteria	Proteobacteria	Betaproteobacteria	un_Betaproteobacteria	un_Betaproteobacteria	un_Betaproteobacteria
609	GACGAACGCTGGCGGCGTGCTTAACACATGCAAGTGGAGCGACGAACCAGGGCTTGCCCTGGGGCAGAGCCGCGAACGGGTGAGTAACACGTGGGTAACCTACCCCGATGACCGGGACAA-TCGCATCGGGACGGGCCCGCGGCCCATTAGCTTGTTGGTGGGGTAACGGCCTACCAAGGCGACGATGGGTAGCTGGTCTGAGAGGACGATCAGCCACACTGGGACTGAGACACGGCCCAG	0.0712396	0.0843313	0.0353315	0.0546192	0.0384862	0.0252755	0.0483442	0.105217	0	0.0184911	0.0183217	0.0251636	0	0	0.0159566	0	0.0157381	0	0	0	0	0.00968335	0.0111957	0	0	0.00702889	0	0.0121197	0.0315424	0.0139801	0.0288417	0.00589866	Bacteria	Actinobacteria	Actinobacteria	Solirubrobacterales	Solirubrobacteraceae	Solirubrobacter
610	ATTGAACGCTGGCGGCAGGCCTAACACATGCAAGTCGAGCGGCAGCACGGGTACTTGTACCTGGTGGCGAGCGGCGGACGGGTGAGTAATGCCTAGGAATCTGCCTGGTAGTGGGGGATA-GCGCTATCAGATGAGCCTAGGTCGGATTAGCTAGTTGGTGAGGTAATGGCTCACCAAGGCGACGATCCGTAACTGGTCTGAGAGGATGATCAGTCACACTGGAACTGAGACACGGTCCAG	0.0407083	0.0337325	0.0353315	0.0468165	0.0320718	0.050551	0.00805737	0.0350723	0.0444444	0.0184911	0.0183217	0.0754907	0	0	0.0159566	0.0338524	0	0	0	0.0155642	0.0111321	0	0.0111957	0	0.0084246	0.0140578	0.0118596	0	0	0.00699007	0	0.0117973	Bacteria	Proteobacteria	Gammaproteobacteria	Pseudomonadales	Pseudomonadaceae	Pseudomonas
611	GACGAACGCTGGCGGCGTGCCTAATACATGCAAGTCGTGCGGGGTCTTGAAGGGCTTGCCCTTTAAGACCCAGCGGCGAACGGGTGAGTAACACGTGGGTAACCTGCCCGCAAGACCGGG-CCACTTGCGGATGGGCCCGCGGCGCATTAGCTGGTTGGTGAGGTAACGGCTCACCAAGGCGACGATGCGTAGCCGACCTGAGAGGGTGATCGGCCACACTGGGACTGAGACACGGCCCAG	0	0	0	0	0.00641437	0	0	0.00876808	0.0355556	0.0184911	0.0366435	0	0.0226296	0.0367579	0.0239349	0.0451365	0	0	0	0	0	0.00968335	0.0111957	0.012667	0.0168492	0.0210867	0.0118596	0.0121197	0	0.0419404	0.0461467	0.0412906	Bacteria	Firmicutes	Bacilli	Bacillales	Thermoactinomycetaceae 2	Planifilum
612	GATGAACGCTAGCGGCAGGCTTAATACATGCAAGTCGTGGGGCAGCATGGGGTAGCAATACTCTGATGGCGACCGGCAAACGGGTGCGGAACACGTACGCAACCTTCCTTTAACTGGAGA-GCGGTTAAAGATGGGCGTGCGCCTGATTAGGTAGTTGGCGGGGTAACGGCCCACCAAGCCTGCGATCAGTAACTGGTGTGAGAGCACGACCAGTCACACGGGCACTGAGACACGGGCCCG	0	0	0.0117772	0.00780275	0.00641437	0.0050551	0.00805737	0.00876808	0.0177778	0.0369822	0.0366435	0.0503271	0.0226296	0.0367579	0.0239349	0.0451365	0.0157381	0.0205973	0	0.0155642	0.0111321	0.0484168	0.0335871	0.0443347	0.0505476	0.00702889	0.0237192	0.0363592	0.0210283	0.00699007	0.0230734	0.017696	Bacteria	Bacteroidetes	Sphingobacteria	Sphingobacteriales	Chitinophagaceae	un_Chitinophagaceae
613	GACGAACGCTGGCGGCGTGCTTAACACATGCAAGTGGAGCGACGAACCAGGCTTCGGCCTGGGGCAGAGCCGCGAACGGGTGAGTAACACGTGGGTAACCTGCCTCGATGACTGGGACAA-CCGCATCGAGATGGGCCCGCGGCCCATTAGCTTGTTGGTGAGGTAAAGGCTCACCAAGGCTGCGATGGGTAGCTGGTCTGAGAGGACGATCAGCCACACTGGGACTGAGACACGGCCCAG	0.0508854	0.0337325	0.0235544	0	0.0256575	0.0404408	0.0241721	0.0438404	0.0711111	0.0369822	0.164896	0.0754907	0.0452591	0.0367579	0.0478698	0.0338524	0	0.0411946	0.0486973	0.0466926	0.0111321	0.0387334	0.0223914	0.0253341	0.0336984	0.0421733	0.0711575	0.0242395	0.0105141	0.0559206	0.0865251	0.0766826	Bacteria	Actinobacteria	Actinobacteria	un_Actinobacteria	un_Actinobacteria	un_Actinobacteria
614	GACGAACGCTGGCGGCGTGCCTAATGCATGCAAGTCGCACGCAGCACCTTCGGGTGCTGAGTGGCGCACGGCTGAGGATCACGTGGGAACATGCCTCCTTGTGGGGGACAACACCGCGAA-GCGCAGGGAGAGTGGCCCGCGGCCCATCAGGTCGTTGGTGGGGTAATGGCCTACCAAGCCGGTGACGGGTAGCTGGTCTGTGAGGACAGACAGCCAGACTGGGACTGAGACACGGCCCAG	0.0508854	0.0337325	0.0471087	0.0468165	0.0384862	0.0151653	0.0241721	0.0526085	0.0177778	0.0184911	0.0732869	0.125818	0.0226296	0	0.0319132	0.0564207	0	0.0411946	0.0243487	0	0.0333964	0.0290501	0.0223914	0.00633352	0.0084246	0.0140578	0.0118596	0.0121197	0	0.0279603	0.0346101	0.0294933	Bacteria	Chloroflexi	Chloroflexi	Chloroflexales	Chloroflexaceae	un_Chloroflexaceae
615	GATCAACGCTGGCGGCGTGCCTAATGCATGCAAGTCGAACGTGGTCCCTTCGGGGATGCGCGTGGCGGACGGGTGAGGAACACGTGGGGAACCTGCCTTTTGGTGGGGGGTAGCCCTCGG-TCGCCGAAAGAGGGTCCTGCGGCCGATTAGCTAGACGGTGGGGTAACGGCCTACCGTGGCGATGATCGGTAGCTGGTCTGAGAGGACGGCCAGCCACAGGGGAACTGAGACACGGTCCCC	0.0101771	0	0	0	0.00641437	0.0050551	0.0161147	0.00876808	0.0266667	0	0	0	0	0	0.0079783	0	0	0	0	0.0311284	0	0.00968335	0	0.00633352	0.0084246	0.0210867	0.0118596	0.0363592	0.0105141	0.0489305	0.0576834	0.0412906	Bacteria	Chloroflexi	Thermomicrobia	Sphaerobacterales	Sphaerobacteraceae	Sphaerobacter
616	ATTGAACGCTGGCGGCATGCCTAACACATGCAAGTCGAACGGTAACAGGCCCTTCGGGGTGCTGACGAGTGGCGGACGGGTGAGTAATACGTAGGAATCTGCCCAGTAGTGGGGGATAAC-GCGCTATTGGATGAGCCTACGTCGGATTAGCTTGTTGGTGGGGTAATGGCTCACCAAGGCAACGATCCGTAGCTGGTCTGAGAGGACGATCAGCCACACTGGGACTGAGACACGGCCCAG	0.0203542	0.0505988	0	0.0390137	0.00641437	0.0202204	0	0.0350723	0.00888889	0.0554734	0.0366435	0	0.0226296	0.018379	0	0.0112841	0.0157381	0	0.0486973	0.0155642	0.0333964	0	0.0111957	0.0190006	0.0084246	0	0	0	0.0105141	0.0139801	0.0230734	0.017696	Bacteria	Proteobacteria	Gammaproteobacteria	un_Gammaproteobacteria	un_Gammaproteobacteria	un_Gammaproteobacteria
617	ATTGAACGCTGGCGGCATGCTTTACACATGCAAGTCGAGCGGCAGCGGGGGTGCTTGCACCTGCCGGCGAGCGGCGAACGGGTGAGTAATGCATCGGAACGTACCCATGTGGTGGGGGAT-GCGCCATTGGAGCGGCCGATGTCGGATTAGCTAGTAGGTGAGGTAATGGCTCACCTAGGCGACGATCCGTAGCTGGTCTGAGAGGATGATCAGCCACACTGGGACTGAGACACGGCCCAG	0.0101771	0.0843313	0.0588859	0.062422	0.0192431	0.0606612	0.0241721	0.00876808	0.00888889	0	0	0	0	0	0.0079783	0	0	0	0	0.0155642	0	0	0.0111957	0.00633352	0	0.0140578	0	0	0.0210283	0.00699007	0.00576834	0.0117973	Bacteria	Proteobacteria	Betaproteobacteria	Rhodocyclales	Rhodocyclaceae	Azoarcus
618	ATTGAACGCTGGCGGCATGCCTTACACATGCAAGTCGAACGCGAAAGCGGGGCAACCCGCAAGTAGAGTGGCGAACGGGTGAGTAATACATCGGAACATGTCCAGTAGCGGGGGATAACC-GCACTATTGGAGTGGCCGATGTCGGATTAGCTAGTTGGTGAGGTAAAGGCTTACCAAGGCGACGATCCGTAGCTGGTCTGAGAGGACGATCAGCCACACTGGAACTGAGACACGGTCCAG	0.0101771	0	0.0471087	0.00780275	0.0577293	0.0454959	0.0805737	0.0263043	0.00888889	0	0.0183217	0	0.0226296	0.018379	0.0079783	0.0112841	0	0	0.0486973	0	0.0111321	0.00968335	0.0111957	0.0253341	0.0252738	0.0210867	0.0118596	0.0363592	0.0525707	0.0349504	0	0.0294933	Bacteria	Proteobacteria	Betaproteobacteria	un_Betaproteobacteria	un_Betaproteobacteria	un_Betaproteobacteria
619	GACGAACGCTGGCGGCGTGCTTAACACATGCAAGTGGAGCGACGAACCAGGGCTTGCCCTGGGGCAGAGCCGCGAACGGGTGAGTAACACGTGGGTAACCCACCCCGATGATCGGGACAA-TCGCATCGGGACGGGCCCGCGGCCCATTAGCTTGTTGGTGAGGTAACGGCTCACCAAGGCGACGATGGGTAGCTGGTCTGAGAGGACGATCAGCCACACTGGGACTGAGACACGGCCCAG	0.0610625	0.0168663	0.0353315	0.062422	0.0128287	0.0353857	0.0402868	0.0789128	0.0177778	0.0369822	0.0183217	0.0754907	0.0452591	0	0.0239349	0	0	0.0205973	0.0243487	0	0.0222643	0.00968335	0.0111957	0.00633352	0.0084246	0.0140578	0.0592979	0.0242395	0	0.0279603	0.017305	0.0235946	Bacteria	Actinobacteria	Actinobacteria	Solirubrobacterales	Solirubrobacteraceae	Solirubrobacter
620	ATTGAACGCTGGCGGCAGGCCTAACACATGCAAGTCGCACGAGAAAGGGCTTCGGCCTGAGTAGAGTGGCGGACGGGTGAGTAATGCGTAGGAATCTGTCTGGTAGTGGGGGATAACGCG-GCGCTATCAGGTGAGCCTACGTCGGATTAGCTAGTTGGTAGGGTAAAGGCCTACCAAGGCGACGATCCGTAGCTGGTCTGAGAGGATGATCAGCCACACTGGGACTGAGACACGGCCCAG	0.0712396	0.0337325	0.129549	0.0390137	0.0513149	0.0353857	0.0483442	0.0438404	0.0177778	0.0554734	0	0.0251636	0.0226296	0.0551369	0.0558481	0	0	0.0205973	0.0243487	0.0311284	0.0111321	0	0.0111957	0.00633352	0.0252738	0.0210867	0.0237192	0	0.0105141	0.0209702	0.0115367	0.017696	Bacteria	Proteobacteria	Gammaproteobacteria	un_Gammaproteobacteria	un_Gammaproteobacteria	un_Gammaproteobacteria
621	AATCAACGCTGGCGGCGTGCCTAACACATGCAAGTCGTACGCGAAAGGGGCTTCGGCCCTGAGTAGAGTGGCGAACGGGTGAGTAACACGTGAGTGACCTACCTCCGAGTGGGGGATAAC-GCGCTTGGAGAGGGGCTCGCGGCTGATTAGCTAGTTGGTGGGGTAATGGCCCACCAAGGCGACGATCAGTAGCCGGCCTGAGAGGGCGGACGGCCACACTGGGACTGAGACACGGCCCAG	0.0203542	0.0168663	0	0.00780275	0	0.0101102	0.00805737	0.00876808	0.0444444	0.0554734	0.0366435	0.0251636	0.0452591	0	0.0159566	0.0338524	0.0157381	0	0.0243487	0.0155642	0	0	0.0335871	0.012667	0.0084246	0.0210867	0	0.0363592	0	0	0.0403784	0.017696	Bacteria	Acidobacteria	Acidobacteria_Gp6	Acidobacteria_Gp6	Acidobacteria_Gp6	Gp6
622	AACGAACGCTGGCGGCAGGCCTAACACATGCAAGTCGAACGAAGGCCCTCTTCGGAGGTGTCCTTAGTGGCGGACGGGTGAGTAACACGTGGGAACCTACCTAGCAGTACGGAATAACTG-TCGCTGTTGGATGGGCCCGCGGCTGATTAGCTTGTTGGTGAGGTAACGGCTCACCAAGGCGACGATCAGTAGCTGGTCTGAGAGGATGATCAGCCACACTGGGACTGAGACACGGCCCAG	0.0101771	0	0.0117772	0.0546192	0.0577293	0.0404408	0.0483442	0.0526085	0.00888889	0	0	0	0	0	0.0079783	0.0112841	0.0157381	0	0	0	0	0	0.0223914	0	0.0084246	0	0.0118596	0.0242395	0.0315424	0	0.0461467	0	Bacteria	Proteobacteria	Alphaproteobacteria	Rhodospirillales	Rhodospirillaceae	un_Rhodospirillaceae
623	AACGAACGCTGGCGGCATGCCTAACACATGCAAGTCGAACGAGACCTTCGGGTCTAGTGGCGCACGGGTGCGTAACGCGTGGGAATCTGCCCTTGGGTCTGGAATAACAGTTAGAAATGA-TCGCCCAGGGATGAGCCCGCGTAGGATTAGCTTGTTGGTGAGGTAAAAGCTCACCAAGGCGACGATCCTTAGCTGGTCTGAGAGGATGATCAGCCACACTGGGACTGAGACACGGCCCAG	0.0101771	0.0168663	0	0.0234082	0.0384862	0.0202204	0.0241721	0.00876808	0.0266667	0.0554734	0.0366435	0.0251636	0.0452591	0	0.0159566	0.0225683	0	0.0411946	0	0.0311284	0.0111321	0.0193667	0	0.0253341	0.0084246	0.0140578	0.0474383	0.0121197	0.0105141	0	0.017305	0.0117973	Bacteria	Proteobacteria	Alphaproteobacteria	Sphingomonadales	Sphingomonadaceae	Sphingomonas
624	GACGAACGCTGGCGGCGCGCCTAATACATGCAAGTCGAGCGAGAACCGGGGCTTCGGCCCCGGGGAGAGCGGCGAACGGGTGCGTATCACGTGAGCAACCTGCCTCGGAGACCGGAATAA-CCGCTCCGAGATGGGCTCGCGGCCTATCAGCTTGTTGGTGGGGTAACGGCCTACCAAGGCAACGACGGGTAGCTGGTCTGAGAGGACGATCAGCCACACTGGGACTGAGACACGGCCCAG	0.0203542	0.0168663	0.0117772	0.0234082	0	0.0101102	0	0.00876808	0.0533333	0.0369822	0.0732869	0	0.0452591	0.0367579	0.0319132	0.0564207	0	0.061792	0.0243487	0.0466926	0.0333964	0.0290501	0.0223914	0.0443347	0.0168492	0.0351444	0.0355787	0.0242395	0.0525707	0.0279603	0.017305	0.017696	Bacteria	Actinobacteria	Actinobacteria	un_Actinobacteria	un_Actinobacteria	un_Actinobacteria
625	AATCAACGCTGGCGGCGTGCCTAACACATGCAAGTCGAACGAGAAAGTGGAGCAATCCATGAGTAAAGTGGCGACCGGGTGAGTAACACGTGACTAACCTACCTTCAAGTGGGGGATAAC-TCGCTGGAAGAGGGGGTCGCGGCTGATTAGCTAGTTGGCGGGGTAATGGCCCACCAAGGCAGAGATCGGTAGCCGGCCTGAGAGGGCGCACGGCCACACTGGAACTGAAACACGGTCCAG	0.0305312	0	0	0	0.00641437	0	0	0	0.106667	0.0184911	0.0549652	0.0503271	0	0.018379	0.0239349	0.0338524	0.0157381	0	0.0486973	0.0155642	0.0333964	0.00968335	0.0447828	0.0253341	0.0758214	0.00702889	0.0118596	0.0242395	0	0.0139801	0.00576834	0.00589866	Bacteria	Acidobacteria	Acidobacteria_Gp1	Acidobacteria_Gp1	Acidobacteria_Gp1	Gp1
626	AACGAACGCTGGCGGCATGCCTAACACATGCAAGTCGAACGAAGCCTTCGGGCTTAGTGGCGCACGGGTGCGTAACGCGTGGGAATCTGCCCTTGGGTACGGAATAGCTCCGGGAAACTG-TCGCCCAAGGATGAGCCCGCGTCGGATTAGCTAGTTGGTGAGGTAAAAGCTCACCAAGGCGACGATCCGTAGCTGGTCTGAGAGGATGATCAGCCACACTGGGACTGAGACACGGCCCAG	0.0203542	0	0.0117772	0.031211	0.0192431	0.0454959	0.0161147	0.00876808	0.00888889	0.0369822	0.0183217	0.0251636	0	0	0	0.0112841	0.0157381	0.0205973	0	0.0155642	0	0.0387334	0	0	0	0.00702889	0.0118596	0.0242395	0.0105141	0.0279603	0	0.00589866	Bacteria	Proteobacteria	Alphaproteobacteria	Sphingomonadales	Sphingomonadaceae	un_Sphingomonadaceae
627	GATGAACGCTAGCGGCAGGCTTAATACATGCAAGTCGAGGGGCAGCGCAGTGTAGCAATACATGGGCGGCGACCGGCAAACGGGTGCGGAACACGTACGCAACCTACCCAAAACTGGGGA-CGGTTTTGGATGGGCGTGCGCCTGATTAGGTAGTTGGTGAGGGTAACGGCCCACCAAGCCTGCGATCAGTAACTGGTGTGAGAGCACGACCAGTCACACGGGCACTGAGACACGGGCCCG	0	0	0.0471087	0.0156055	0	0.0151653	0.0161147	0	0.0266667	0.0184911	0	0	0	0	0.0079783	0	0.0472144	0.0411946	0	0.0155642	0.0111321	0.00968335	0.0223914	0.0190006	0.0336984	0.0351444	0	0	0.0525707	0.00699007	0.00576834	0	Bacteria	Bacteroidetes	Sphingobacteria	Sphingobacteriales	Chitinophagaceae	Flavisolibacter
[truncated: 236 more rows]

## Sheet: Table S5
TABLE S5 Sequences and relative abundances of phylotypes based on 16S rDNA amplicons from extracted DNA and RNA (cDNA) of controls (C) and pyrene treatment (P) of fertilized soil (F) at day 46 and phylogenetic affiliations based on annotation, using the SeqMatch analysis tool of the Ribosomal Database Project (uncultured bacteria and isolates, only good quality sequences >1200 bases) (Cole et al.…
[truncated: 1,150 more rows]
